# Supplementary material for: microRNA-seq of cartilage reveals an overabundance of miR-140-3p which contains functional isomiRs
Source: RNA. 2020 Nov;26(11):1575–88. doi: 10.1261/rna.075176.120 (PMC7566571; doi:10.1261/rna.075176.120)
Supplement: Supplemental Material [file supp_075176.120_Supplemental_Tables.xlsx]

## Sheet: Contents
			Short title	Description
		Supplemental Table S1	Cartilage sRNA-seq	Cartilage sRNA-seq from 3 donors. All sequences including isomiRs aligning to 990 mature miRNAs are shown with read count.
		Supplemental Table S2	Predicted targets	Predicted targets of miR-140-5p miR-140-3p.1 and miR-140-3p.2 by TargetScanHuman 7.2. Gene lists correspond to venn diagram in figure 2B.
		Supplemental Table S3	Human chondrocyte gene expression	Human chondrocyte gene expression changes following transfection of miRNA mimics: miR-140-3p.1 vs CON, miR-140-3p.2 vs CON, miR-140-3p.1 vs miR-140-3p.2
		Supplemental Table S4	Human chondrocyte gene lists	Gene lists from human chondrocytes: Genes decreased with miR-140-3p.1 vs control, Genes decreased with miR-140-3p.2 vs control, Genes decreased with both miR-140-3p.1 and miR-140-3p.2 vs control, and genes significantly different between miR-140-3p.1 and miR-140-3p.2 whendirectly compared.
		Supplemental Table S5	Human chondrocyte pathway analysis	Pathway analysis using DAVID for genes decreased with miR-140-3p.1, genes decreased with miR-140-3p.2 genes significantly different between miR-140-3p.1 and miR-140-3p.2.
		Supplemental Table S6	MIR140 KO mice gene expression	RNAseq of mouse rib cartilage of MIR140 KO mice and WT control mice
		Supplemental Table S7	MIR140 KO mice gene lists	List of up and down regulated genes in MIR140 KO mice
		Supplemental Table S8	MIR140 KO mice pathway analysis	Pathway analysis using DAVID for genes up regulated in MIR140 KO mice
		Supplemental Table S9	Human vs mouse	Cross over between predicted targets, human chondrocyte data and mouse KO data
		Supplemental Table S10	Oligonucleotides	Table of oligonucleotides used in this study. Targets of miR-140-3p.1 and miR-140-3p.2 used for cloning into pMiR-GLO by InFusion. Primers used for the generation and genotyping of miR-140-/- mice.

## Sheet: Supplemental Table S1
seq	size	c15	c16	c17	mir	start	end	strand		average
AATGAGGTAGTAGGTTGTATAGTT	24	63.2832	6.40216	1.07562	hsa-let-7a	1	20	+		23.587
AATGAGGTAGTAGGTTGTATAGT	23	25.5734	1.96989	5.91588	hsa-let-7a	1	19	+		11.153
GTTGAGGTAGTAGGTTGTATGG	22	3.46758	3.44732	3.76465	hsa-let-7a	1	18	+		3.55985
ATTGAGGTAGTAGGTTGTATAGTT	24	6.06826	0.492474	3.22685	hsa-let-7a	1	20	+		3.26253
CATGAGGTAGTAGGTTGTATAGTT	24	5.63481	0.492474	2.68904	hsa-let-7a	1	20	+		2.93877
GTTGAGGTAGTAGGTTGTATAGTT	24	4.76792	1.47742	1.07562	hsa-let-7a	1	20	+		2.44032
AATGAGGTAGTAGGTTGTATAGTTA	25	5.20136	0.492474	0.537808	hsa-let-7a	1	21	+		2.07721
CTTGAGGTAGTAGGTTGTATAGTT	24	3.46758	0	2.68904	hsa-let-7a	1	20	+		2.0522
CCTGAGGTAGTAGGTTGTATAGTT	24	3.46758	2.46237	0	hsa-let-7a	1	20	+		1.97665
GCTGAGGTAGTAGGTTGTATAGTT	24	5.63481	0	0	hsa-let-7a	1	20	+		1.87827
GATGAGGTAGTAGGTTGTATAGT	23	2.16723	0	2.15123	hsa-let-7a	1	19	+		1.43949
TGTGAGGTAGTAGGTTGTATAGTT	24	2.60068	0	1.61342	hsa-let-7a	1	20	+		1.4047
AATGAGGTAGTAGGTTGTATAGA	23	3.03413	0	1.07562	hsa-let-7a	1	19	+		1.36991
ACTGAGGTAGTAGGTTGTATAGTT	24	3.90102	0	0	hsa-let-7a	1	20	+		1.30034
AATGAGGTAGTAGGTTGTATAG	22	1.73379	0.492474	1.61342	hsa-let-7a	1	18	+		1.27989
TATGAGGTAGTAGGTTGTATAGTT	24	3.46758	0	0	hsa-let-7a	1	20	+		1.15586
AATGAGGTAGTAGGTTGTATAGTA	24	2.60068	0.492474	0	hsa-let-7a	1	20	+		1.03105
CATGAGGTAGTAGGTTGTATAGT	23	1.73379	0.492474	0.537808	hsa-let-7a	1	19	+		0.921356
TTTGAGGTAGTAGGTTGTATAGTT	24	2.16723	0.492474	0	hsa-let-7a	1	20	+		0.886569
ACTGAGGTAGTAGGTTGTATAGT	23	2.60068	0	0	hsa-let-7a	1	19	+		0.866894
GATGAGGTAGTAGGTTGTATAGTT	24	0.866894	0.984947	0.537808	hsa-let-7a	1	20	+		0.796549
GATGAGGTAGTAGGTTGTATAG	22	2.16723	0	0	hsa-let-7a	1	18	+		0.722412
TATGAGGTAGTAGGTTGTATAGT	23	2.16723	0	0	hsa-let-7a	1	19	+		0.722412
TCTGAGGTAGTAGGTTGTATAGTT	24	2.16723	0	0	hsa-let-7a	1	20	+		0.722412
CTTGAGGTAGTAGGTTGTATAGTTA	25	1.30034	0.492474	0	hsa-let-7a	1	21	+		0.597605
TCTGAGGTAGTAGGTTGTATAGTTA	25	1.30034	0.492474	0	hsa-let-7a	1	21	+		0.597605
ATTGAGGTAGTAGGTTGTATAGT	23	1.73379	0	0	hsa-let-7a	1	19	+		0.577929
GTTGAGGTAGTAGGTTGTATAGTTG	25	1.73379	0	0	hsa-let-7a	1	21	+		0.577929
TCTGAGGTAGTAGGTTGTATAGT	23	0	0.492474	1.07562	hsa-let-7a	1	19	+		0.522696
GTTGAGGTAGTAGGTTGTATG	21	0	1.47742	0	hsa-let-7a	1	17	+		0.492474
GTTGAGGTAGTAGGTTGTATGA	22	0	1.47742	0	hsa-let-7a	1	18	+		0.492474
GTTGAGGTAGTAGGTTGTA	19	0.866894	0.492474	0	hsa-let-7a	1	15	+		0.453122
TTTGAGGTAGTAGGTTGTATAGT	23	0.866894	0.492474	0	hsa-let-7a	1	19	+		0.453122
AATGAGGTAGTAGGTTGTATAGTTT	25	0.866894	0.492474	0	hsa-let-7a	1	21	+		0.453122
AATGAGGTAGTAGGTTGTATA	21	1.30034	0	0	hsa-let-7a	1	17	+		0.433447
CTTGAGGTAGTAGGTTGTATAGT	23	1.30034	0	0	hsa-let-7a	1	19	+		0.433447
TTTGAGGTAGTAGGTTGTATAGA	23	1.30034	0	0	hsa-let-7a	1	19	+		0.433447
ACTGAGGTAGTAGGTTGTATAGAA	24	1.30034	0	0	hsa-let-7a	1	20	+		0.433447
AATGAGGTAGTAGGTTGTATAGTAA	25	1.30034	0	0	hsa-let-7a	1	21	+		0.433447
ATTGAGGTAGTAGGTTGTATAGTTAG	26	1.30034	0	0	hsa-let-7a	1	22	+		0.433447
CCTGAGGTAGTAGGTTGTATAGT	23	0	0	1.07562	hsa-let-7a	1	19	+		0.358538
CCTGAGGTAGTAGGTTGTATAG	22	0	0.984947	0	hsa-let-7a	1	18	+		0.328316
ACTGAGGTAGTAGGTTGTATAGTTA	25	0.433447	0	0.537808	hsa-let-7a	1	21	+		0.323751
AATGAGGTAGTAGGTTGTATGG	22	0.866894	0	0	hsa-let-7a	1	18	+		0.288965
CTTGAGGTAGTAGGTTGTATAA	22	0.866894	0	0	hsa-let-7a	1	18	+		0.288965
AATGAGGTAGTAGGTTGTATAAA	23	0.866894	0	0	hsa-let-7a	1	19	+		0.288965
ATTGAGGTAGTAGGTTGTATAGA	23	0.866894	0	0	hsa-let-7a	1	19	+		0.288965
CGTGAGGTAGTAGGTTGTATAGT	23	0.866894	0	0	hsa-let-7a	1	19	+		0.288965
GTTGAGGTAGTAGGTTGTATAGT	23	0.866894	0	0	hsa-let-7a	1	19	+		0.288965
CTTGAGGTAGTAGGTTGTATAGTA	24	0.866894	0	0	hsa-let-7a	1	20	+		0.288965
AATGAGGTAGTAGGTTGTATAGTGT	25	0.866894	0	0	hsa-let-7a	1	21	+		0.288965
ATTGAGGTAGTAGGTTGTATAGTTT	25	0.866894	0	0	hsa-let-7a	1	21	+		0.288965
ATTGAGGTAGTAGGTTGTATGG	22	0	0.492474	0	hsa-let-7a	1	18	+		0.164158
GGTGAGGTAGTAGGTTGTATAG	22	0	0.492474	0	hsa-let-7a	1	18	+		0.164158
AATGAGGTAGTAGGTT	16	0.433447	0	0	hsa-let-7a	1	12	+		0.144482
TTTGAGGTAGTAGGTTGTCT	20	0.433447	0	0	hsa-let-7a	1	16	+		0.144482
AATGAGGTAGTAGGTTGTATG	21	0.433447	0	0	hsa-let-7a	1	17	+		0.144482
GTTGAGGTAGTAGGTTGTATA	21	0.433447	0	0	hsa-let-7a	1	17	+		0.144482
TTTGAGGTAGTAGGTTGTATA	21	0.433447	0	0	hsa-let-7a	1	17	+		0.144482
AATGAGGTAGTAGGTTGTATAA	22	0.433447	0	0	hsa-let-7a	1	18	+		0.144482
CATGAGGTAGTAGGTTGTATAG	22	0.433447	0	0	hsa-let-7a	1	18	+		0.144482
CTTGAGGTAGTAGGTTGTATAG	22	0.433447	0	0	hsa-let-7a	1	18	+		0.144482
CTTGAGGTAGTAGGTTGTATGG	22	0.433447	0	0	hsa-let-7a	1	18	+		0.144482
TATGAGGTAGTAGGTTGTATAG	22	0.433447	0	0	hsa-let-7a	1	18	+		0.144482
AATGAGGTAGTAGGTTGTATAGC	23	0.433447	0	0	hsa-let-7a	1	19	+		0.144482
AGTGAGGTAGTAGGTTGTATAGT	23	0.433447	0	0	hsa-let-7a	1	19	+		0.144482
TGTGAGGTAGTAGGTTGTATAGT	23	0.433447	0	0	hsa-let-7a	1	19	+		0.144482
AATGAGGTAGTAGGTTGTATAGAA	24	0.433447	0	0	hsa-let-7a	1	20	+		0.144482
AGTGAGGTAGTAGGTTGTATAGTT	24	0.433447	0	0	hsa-let-7a	1	20	+		0.144482
GGTGAGGTAGTAGGTTGTATAGTT	24	0.433447	0	0	hsa-let-7a	1	20	+		0.144482
ACTGAGGTAGTAGGTTGTATAGTTT	25	0.433447	0	0	hsa-let-7a	1	21	+		0.144482
ATTGAGGTAGTAGGTTGTATAGTTA	25	0.433447	0	0	hsa-let-7a	1	21	+		0.144482
CGTGAGGTAGTAGGTTGTATAGTTG	25	0.433447	0	0	hsa-let-7a	1	21	+		0.144482
GATGAGGTAGTAGGTTGTATAGTTA	25	0.433447	0	0	hsa-let-7a	1	21	+		0.144482
GTTGAGGTAGTAGGTTGTATAGTTT	25	0.433447	0	0	hsa-let-7a	1	21	+		0.144482
TATGAGGTAGTAGGTTGTATAGTTA	25	0.433447	0	0	hsa-let-7a	1	21	+		0.144482
ATGAGGTAGTAGGTTGTATAGTT	23	383.601	38.4129	44.1002	hsa-let-7a	2	20	+		155.371
ATGAGGTAGTAGGTTGTATAGT	22	159.075	9.84947	17.7476	hsa-let-7a	2	19	+		62.224
GTGAGGTAGTAGGTTGTATAGT	22	39.4437	58.1119	35.4953	hsa-let-7a	2	19	+		44.3503
TTGAGGTAGTAGGTTGTATGG	21	27.3072	68.4538	32.8063	hsa-let-7a	2	18	+		42.8557
GTGAGGTAGTAGGTTGTATAGTT	23	32.0751	32.5033	29.0416	hsa-let-7a	2	20	+		31.2066
CTGAGGTAGTAGGTTGTATAGTT	23	42.4778	15.7592	15.5964	hsa-let-7a	2	20	+		24.6111
TTGAGGTAGTAGGTTGTATAGTT	23	41.6109	19.6989	11.8318	hsa-let-7a	2	20	+		24.3805
ATGAGGTAGTAGGTTGTATAGTTA	24	52.0136	2.46237	1.61342	hsa-let-7a	2	21	+		18.6965
TTGAGGTAGTAGGTTGTATAGT	22	23.8396	16.7441	14.5208	hsa-let-7a	2	19	+		18.3682
CTGAGGTAGTAGGTTGTATAGT	22	24.7065	8.86452	11.8318	hsa-let-7a	2	19	+		15.1343
ATGAGGTAGTAGGTTGTATAG	21	31.2082	4.43226	3.76465	hsa-let-7a	2	18	+		13.135
GTGAGGTAGTAGGTTGTATAG	21	11.2696	15.7592	4.84027	hsa-let-7a	2	18	+		10.623
ATGAGGTAGTAGGTTGTATAGTTT	24	26.8737	2.95484	1.07562	hsa-let-7a	2	21	+		10.3014
ATGAGGTAGTAGGTTGTATAGTA	23	21.6723	1.47742	1.07562	hsa-let-7a	2	20	+		8.07513
ATGAGGTAGTAGGTTGTATAGTAA	24	16.471	0.492474	1.07562	hsa-let-7a	2	21	+		6.01302
TTGAGGTAGTAGGTTGTATAG	21	3.46758	5.90968	3.76465	hsa-let-7a	2	18	+		4.38064
TTGAGGTAGTAGGTTGTATG	20	2.16723	4.92474	3.76465	hsa-let-7a	2	17	+		3.61887
ATGAGGTAGTAGGTTGTATAGA	22	5.63481	2.46237	1.61342	hsa-let-7a	2	19	+		3.23687
TTGAGGTAGTAGGTTGTATAGTTA	24	5.20136	1.96989	2.15123	hsa-let-7a	2	21	+		3.1075
CTGAGGTAGTAGGTTGTATAGTTT	24	3.90102	3.44732	1.61342	hsa-let-7a	2	21	+		2.98725
CTGAGGTAGTAGGTTGTATAGTA	23	4.33447	2.95484	1.07562	hsa-let-7a	2	20	+		2.78831
TTGAGGTAGTAGGTTGTATAGTA	23	6.93515	0.492474	0.537808	hsa-let-7a	2	20	+		2.65514
TTGAGGTAGTAGGTTGTATGA	21	0.433447	6.89463	0	hsa-let-7a	2	18	+		2.44269
GTGAGGTAGTAGGTTGTATAGA	22	1.30034	3.93979	1.61342	hsa-let-7a	2	19	+		2.28452
ATGAGGTAGTAGGTTGTATAA	21	2.60068	1.47742	2.15123	hsa-let-7a	2	18	+		2.07644
TTGAGGTAGTAGGTTGTATAGTTT	24	2.16723	1.47742	1.61342	hsa-let-7a	2	21	+		1.75269
GTGAGGTAGTAGGTTGTATA	20	1.30034	1.47742	2.15123	hsa-let-7a	2	17	+		1.643
ATGAGGTAGTAGGTTGTAAA	20	3.90102	0.984947	0	hsa-let-7a	2	17	+		1.62866
CTGAGGTAGTAGGTTGTATAG	21	1.30034	2.95484	0.537808	hsa-let-7a	2	18	+		1.59766
ATGAGGTAGTAGGTTGTAT	19	4.76792	0	0	hsa-let-7a	2	16	+		1.58931
TTGAGGTAGTAGGTTGTAT	19	0.433447	1.96989	2.15123	hsa-let-7a	2	16	+		1.51819
TTGAGGTAGTAGGTTGTA	18	0.866894	2.95484	0	hsa-let-7a	2	15	+		1.27391
ATGAGGTAGTAGGTTGTATAGTTG	24	1.73379	0.984947	1.07562	hsa-let-7a	2	21	+		1.26478
ATGAGGTAGTAGGTTGTATAGTTAA	25	3.03413	0	0.537808	hsa-let-7a	2	22	+		1.19065
TTGAGGTAGTAGGTTGTAA	19	0.866894	1.47742	1.07562	hsa-let-7a	2	16	+		1.13998
GTGAGGTAGTAGGTTGTATAGTTT	24	0.866894	1.47742	1.07562	hsa-let-7a	2	21	+		1.13998
ATGAGGTAGTAGGTTGTATGG	21	1.73379	1.47742	0	hsa-let-7a	2	18	+		1.0704
GTGAGGTAGTAGGTTGTATAGTA	23	1.73379	1.47742	0	hsa-let-7a	2	20	+		1.0704
CTGAGGTAGTAGGTTGTATAGTAA	24	2.60068	0	0.537808	hsa-let-7a	2	21	+		1.04616
TTGAGGTAGTAGGTTGTATAGA	22	1.30034	0.492474	1.07562	hsa-let-7a	2	19	+		0.956143
CTGAGGTAGTAGGTTGTATAGTTA	24	1.73379	0.984947	0	hsa-let-7a	2	21	+		0.906245
CTGAGGTAGTAGGTTGTATGG	21	2.16723	0.492474	0	hsa-let-7a	2	18	+		0.886569
GTGAGGTAGTAGGTTGTATAA	21	0.433447	0	2.15123	hsa-let-7a	2	18	+		0.861559
GTGAGGTAGTAGGTTGTAT	19	0	1.96989	0.537808	hsa-let-7a	2	16	+		0.835901
GTGAGGTAGTAGGTTGTATAGTAA	24	1.30034	0.492474	0.537808	hsa-let-7a	2	21	+		0.776874
ATGAGGTAGTAGGTTGTATAGAA	23	1.30034	0.984947	0	hsa-let-7a	2	20	+		0.761763
ATGAGGTAGTAGGTTGTATAGTAT	24	2.16723	0	0	hsa-let-7a	2	21	+		0.722412
TTGAGGTAGTAGGTTGTATAGTTG	24	2.16723	0	0	hsa-let-7a	2	21	+		0.722412
GTGAGGTAGTAGGTTGTATAGAA	23	0	0	2.15123	hsa-let-7a	2	20	+		0.717077
TTGAGGTAGTAGGTTGTAAA	20	0	1.96989	0	hsa-let-7a	2	17	+		0.656631
TTGAGGTAGTAGGTTGTATGT	21	0	1.96989	0	hsa-let-7a	2	18	+		0.656631
ATGAGGTAGTAGGTTGTATG	20	0.866894	0	1.07562	hsa-let-7a	2	17	+		0.647503
CTGAGGTAGTAGGTTGTATAGA	22	0.866894	0.492474	0.537808	hsa-let-7a	2	19	+		0.632392
ATGAGGTAGTAGGTTGTATAAA	22	1.73379	0	0	hsa-let-7a	2	19	+		0.577929
GTGAGGTAGTAGGTTGTATAGTTA	24	1.73379	0	0	hsa-let-7a	2	21	+		0.577929
GTGAGGTAGTAGGTTGTA	18	0	0.984947	0.537808	hsa-let-7a	2	15	+		0.507585
ATGAGGTAGTAGGTTGTATA	20	0.866894	0.492474	0	hsa-let-7a	2	17	+		0.453122
TTGAGGTAGTAGGTTGTATA	20	0.866894	0.492474	0	hsa-let-7a	2	17	+		0.453122
ATGAGGTAGTAGGTTGTAA	19	1.30034	0	0	hsa-let-7a	2	16	+		0.433447
CTGAGGTAGTAGGTTGTATAA	21	1.30034	0	0	hsa-let-7a	2	18	+		0.433447
TTGAGGTAGTAGGTTGTATAA	21	1.30034	0	0	hsa-let-7a	2	18	+		0.433447
ATGAGGTAGTAGGTTGTATAGTG	23	1.30034	0	0	hsa-let-7a	2	20	+		0.433447
AAGAGGTAGTAGGTTGTATAGTTA	24	1.30034	0	0	hsa-let-7a	2	21	+		0.433447
CTGAGGTAGTAGGTTGTATAGTG	23	0	0	1.07562	hsa-let-7a	2	20	+		0.358538
GTGAGGTAGTAGGTTGTAA	19	0	0.492474	0.537808	hsa-let-7a	2	16	+		0.343427
TTGAGGTAGTAGGTTGTAGA	20	0	0.492474	0.537808	hsa-let-7a	2	17	+		0.343427
TTGAGGTAGTAGGTTGTATAGAA	23	0	0.492474	0.537808	hsa-let-7a	2	20	+		0.343427
CTGAGGTAGTAGGTTGTATAGAA	23	0.433447	0	0.537808	hsa-let-7a	2	20	+		0.323751
CTGAGGTAGTAGGTTGTAAA	20	0.433447	0.492474	0	hsa-let-7a	2	17	+		0.30864
TCGAGGTAGTAGGTTGTATAGT	22	0.433447	0.492474	0	hsa-let-7a	2	19	+		0.30864
GTGAGGTAGTAGGTTGTATAGTG	23	0.433447	0.492474	0	hsa-let-7a	2	20	+		0.30864
CTGAGGTAGTAGGTTGTAT	19	0.866894	0	0	hsa-let-7a	2	16	+		0.288965
CTGAGGTAGTAGGTTGTATA	20	0.866894	0	0	hsa-let-7a	2	17	+		0.288965
ATGAGGTAGTAGGTTGTATAGTAG	24	0.866894	0	0	hsa-let-7a	2	21	+		0.288965
GTGAGGTAGTAGGTTGTATAGTTG	24	0.866894	0	0	hsa-let-7a	2	21	+		0.288965
ATGAGGTAGTAGGTTGTATAGTTGT	25	0.866894	0	0	hsa-let-7a	2	22	+		0.288965
GTGAGGTAGTAGGTTGTATAGTTAA	25	0.866894	0	0	hsa-let-7a	2	22	+		0.288965
GTGAGGTAGTAGGTTGTATAGTTGA	25	0.866894	0	0	hsa-let-7a	2	22	+		0.288965
GTGAGGTAGTAGGTTGT	17	0	0	0.537808	hsa-let-7a	2	14	+		0.179269
TTGAGGTAGTAGGTTGTG	18	0	0	0.537808	hsa-let-7a	2	15	+		0.179269
ATGAGGTAGTAGGTTGTGT	19	0	0	0.537808	hsa-let-7a	2	16	+		0.179269
CTGAGGTAGTAGGTTGTAGA	20	0	0	0.537808	hsa-let-7a	2	17	+		0.179269
ATGAGGTAGTAGGTTGTATGA	21	0	0	0.537808	hsa-let-7a	2	18	+		0.179269
GGGAGGTAGTAGGTTGTATAGTT	23	0	0	0.537808	hsa-let-7a	2	20	+		0.179269
CTGAGGTAGTAGGTTGT	17	0	0.492474	0	hsa-let-7a	2	14	+		0.164158
TTGAGGTAGTAGGTTGTAGT	20	0	0.492474	0	hsa-let-7a	2	17	+		0.164158
GTGAGGTAGTAGGTTGTATAT	21	0	0.492474	0	hsa-let-7a	2	18	+		0.164158
ATGAGGTAGTAGGTTGTATAGCT	23	0	0.492474	0	hsa-let-7a	2	20	+		0.164158
CTGAGGTAGTAGGTTGTATAGTAG	24	0	0.492474	0	hsa-let-7a	2	21	+		0.164158
TTGAGGTAGTAGGTTGT	17	0.433447	0	0	hsa-let-7a	2	14	+		0.144482
CTGAGGTAGTAGGTTGTA	18	0.433447	0	0	hsa-let-7a	2	15	+		0.144482
ATGAGGTAGTAGGTTGTAAG	20	0.433447	0	0	hsa-let-7a	2	17	+		0.144482
CTGAGGTAGTAGGTTGTAAG	20	0.433447	0	0	hsa-let-7a	2	17	+		0.144482
GTGAGGTAGTAGGTTGTAGT	20	0.433447	0	0	hsa-let-7a	2	17	+		0.144482
ACGAGGTAGTAGGTTGTATAGTT	23	0.433447	0	0	hsa-let-7a	2	20	+		0.144482
ATGAGGTAGTAGGTTGTATAGTC	23	0.433447	0	0	hsa-let-7a	2	20	+		0.144482
CTGAGGTAGTAGGTTGTATAGTC	23	0.433447	0	0	hsa-let-7a	2	20	+		0.144482
TGGAGGTAGTAGGTTGTATAGTA	23	0.433447	0	0	hsa-let-7a	2	20	+		0.144482
CTGAGGTAGTAGGTTGTATAGTTG	24	0.433447	0	0	hsa-let-7a	2	21	+		0.144482
TTGAGGTAGTAGGTTGTATAGTAA	24	0.433447	0	0	hsa-let-7a	2	21	+		0.144482
TTGAGGTAGTAGGTTGTATAGTAT	24	0.433447	0	0	hsa-let-7a	2	21	+		0.144482
ATGAGGTAGTAGGTTGTATAGTTAT	25	0.433447	0	0	hsa-let-7a	2	22	+		0.144482
ATGAGGTAGTAGGTTGTATAGTTGA	25	0.433447	0	0	hsa-let-7a	2	22	+		0.144482
CTGAGGTAGTAGGTTGTATAGTTGA	25	0.433447	0	0	hsa-let-7a	2	22	+		0.144482
TTGAGGTAGTAGGTTGTATAGTTAA	25	0.433447	0	0	hsa-let-7a	2	22	+		0.144482
TGAGGTAGTAGGTTGTATAGTT	22	26852.9	43781.4	26558.5	hsa-let-7a	3	20	+		32397.6
TGAGGTAGTAGGTTGTATAGT	21	12885.9	22322.8	15030.6	hsa-let-7a	3	19	+		16746.5
TGAGGTAGTAGGTTGTATAG	20	2756.72	5162.6	3861.46	hsa-let-7a	3	18	+		3926.93
TGAGGTAGTAGGTTGTATAGTTA	23	3623.62	5479.75	2575.56	hsa-let-7a	3	21	+		3892.98
TGAGGTAGTAGGTTGTATAGTA	22	1600.72	2615.53	1877.49	hsa-let-7a	3	20	+		2031.24
TGAGGTAGTAGGTTGTATAGTTT	23	1624.13	2505.71	1417.66	hsa-let-7a	3	21	+		1849.16
TGAGGTAGTAGGTTGTATAGA	21	905.471	1808.86	1524.15	hsa-let-7a	3	19	+		1412.82
TGAGGTAGTAGGTTGTATGG	20	887.699	2026.53	1149.29	hsa-let-7a	3	18	+		1354.51
TGAGGTAGTAGGTTGTATAGTAA	23	938.413	1234.14	698.074	hsa-let-7a	3	21	+		956.875
TGAGGTAGTAGGTTGTATAGAA	22	533.573	1075.07	1057.87	hsa-let-7a	3	20	+		888.837
TGAGGTAGTAGGTTGTATAGTTG	23	413.508	767.766	574.378	hsa-let-7a	3	21	+		585.218
TGAGGTAGTAGGTTGTATA	19	270.904	459.478	322.147	hsa-let-7a	3	17	+		350.843
TGAGGTAGTAGGTTGTGT	18	102.727	375.265	382.919	hsa-let-7a	3	16	+		286.97
TGAGGTAGTAGGTTGTAGA	19	159.075	355.073	314.617	hsa-let-7a	3	17	+		276.255
TGAGGTAGTAGGTTGTAAA	19	179.014	372.802	269.979	hsa-let-7a	3	17	+		273.932
TGAGGTAGTAGGTTGTAT	18	193.751	352.119	243.627	hsa-let-7a	3	16	+		263.165
TGAGGTAGTAGGTTGTATAA	20	238.829	305.826	231.257	hsa-let-7a	3	18	+		258.638
TGAGGTAGTAGGTTGTA	17	122.232	257.564	301.71	hsa-let-7a	3	15	+		227.169
TGAGGTAGTAGGTTGTATAGTAT	23	219.324	253.131	158.115	hsa-let-7a	3	21	+		210.19
TGAGGTAGTAGGTTGTGA	18	96.6587	283.665	235.022	hsa-let-7a	3	16	+		205.115
TGAGGTAGTAGGTTGTATAGTAG	23	126.133	258.549	186.081	hsa-let-7a	3	21	+		190.254
TGAGGTAGTAGGTTGTATAGTTAA	24	224.526	217.673	122.62	hsa-let-7a	3	22	+		188.273
TGAGGTAGTAGGTTGTATG	19	110.962	253.131	141.443	hsa-let-7a	3	17	+		168.512
TGAGGTAGTAGGTTGTAG	18	67.6177	191.08	171.023	hsa-let-7a	3	16	+		143.24
TGAGGTAGTAGGTTGTAA	18	87.1228	190.587	131.225	hsa-let-7a	3	16	+		136.312
TGAGGTAGTAGGTTGTATGA	20	81.488	194.527	122.62	hsa-let-7a	3	18	+		132.878
TGAGGTAGTAGGTTGT	16	33.8089	93.57	233.946	hsa-let-7a	3	14	+		120.442
TGAGGTAGTAGGTTGTATAAA	21	117.464	131.983	82.8224	hsa-let-7a	3	19	+		110.756
TGAGGTAGTAGGTTGTG	17	45.9454	123.611	157.04	hsa-let-7a	3	15	+		108.865
TGAGGTAGTAGGTTGTATAGTG	22	70.6518	142.325	107.024	hsa-let-7a	3	20	+		106.667
TGAGGTAGTAGGTTGTATAGTGA	23	46.3788	134.445	104.872	hsa-let-7a	3	21	+		95.2322
TGAGGTAGTAGGTTGTATAGTTAT	24	72.8191	71.4087	32.2685	hsa-let-7a	3	22	+		58.8321
TGAGGTAGTAGGTTGTATAGTTC	23	35.9761	57.6194	33.3441	hsa-let-7a	3	21	+		42.3132
TGAGGTAGTAGGTTGTAAG	19	31.6416	50.7248	38.7221	hsa-let-7a	3	17	+		40.3628
TGAGGTAGTAGGTTGTATAGTTGA	24	28.174	45.8	41.949	hsa-let-7a	3	22	+		38.641
TGAGGTAGTAGGTTGTATAGTC	22	16.0375	31.5183	20.4367	hsa-let-7a	3	20	+		22.6642
TGAGGTAGTAGGTTGTATAGTTAG	24	16.471	28.5635	22.0501	hsa-let-7a	3	22	+		22.3615
TGAGGTAGTAGGTTGTAGT	19	15.1706	24.6237	26.8904	hsa-let-7a	3	17	+		22.2282
TGAGGTAGTAGGTTGTATAGTTTT	24	20.372	27.086	13.983	hsa-let-7a	3	22	+		20.4803
TGAGGTAGTAGGTTGTATAGTGT	23	14.7372	23.6387	21.5123	hsa-let-7a	3	21	+		19.9627
TGAGGTAGTAGGTTGTATAT	20	20.8055	26.1011	10.7562	hsa-let-7a	3	18	+		19.2209
TGAGGTAGTAGGTTGTATAGTTTA	24	18.6382	27.5785	3.22685	hsa-let-7a	3	22	+		16.4812
TGAGGTAGTAGGTTGTATT	19	18.6382	21.1764	6.9915	hsa-let-7a	3	17	+		15.602
TGAGGTAGTAGGTTGTATAGTTGT	24	15.6041	17.729	13.4452	hsa-let-7a	3	22	+		15.5928
TGAGGTAGTAGGTTGTATAGG	21	7.80204	18.2215	19.8989	hsa-let-7a	3	19	+		15.3075
TGAGGTAGTAGGTTGTAAT	19	15.1706	20.1914	10.2183	hsa-let-7a	3	17	+		15.1935
GGAGGTAGTAGGTTGTATAGTT	22	4.33447	18.714	18.2855	hsa-let-7a	3	20	+		13.778
TGAGGTAGTAGGTTGTATGT	20	13.0034	16.2516	7.52931	hsa-let-7a	3	18	+		12.2614
CGAGGTAGTAGGTTGTATAGTT	22	9.10239	12.3118	13.4452	hsa-let-7a	3	20	+		11.6198
TGAGGTAGTAGGTTGTATAGAT	22	8.23549	12.8043	8.06711	hsa-let-7a	3	20	+		9.70231
TGAGGTAGTAGGTTGTATAGAG	22	6.93515	10.8344	8.06711	hsa-let-7a	3	20	+		8.61223
TGAGGTAGTAGGTTGTATATT	21	12.57	6.40216	4.84027	hsa-let-7a	3	19	+		7.93746
AGAGGTAGTAGGTTGTATAGTT	22	11.2696	8.86452	2.68904	hsa-let-7a	3	20	+		7.60773
CGAGGTAGTAGGTTGTATAGT	21	6.93515	9.357	6.45369	hsa-let-7a	3	19	+		7.58195
TGAGGTAGTAGGTTGTATAGC	21	4.33447	8.86452	6.9915	hsa-let-7a	3	19	+		6.73016
TGAGGTAGTAGGTTGTATAGGA	22	3.46758	8.86452	6.9915	hsa-let-7a	3	20	+		6.4412
TGAGGTAGTAGGTTGTATAGCT	22	5.20136	7.3871	4.84027	hsa-let-7a	3	20	+		5.80958
TGAGGTAGTAGGTTGTATAGTTAC	24	3.90102	11.3269	1.61342	hsa-let-7a	3	22	+		5.61378
TGAGGTAGTAGGTTGTATAAG	21	4.76792	6.40216	5.37808	hsa-let-7a	3	19	+		5.51605
GGAGGTAGTAGGTTGTATAGT	21	2.60068	7.3871	5.91588	hsa-let-7a	3	19	+		5.30122
TGAGGTAGTAGGTTGTATAGTAC	23	2.60068	9.357	3.22685	hsa-let-7a	3	21	+		5.06151
TGAGGTAGTAGGTTGTATAAT	21	5.63481	5.90968	2.68904	hsa-let-7a	3	19	+		4.74451
TGAGGTAGTAGGTTGTATTA	20	4.76792	8.37205	1.07562	hsa-let-7a	3	18	+		4.73853
TGAGGTAGTAGGTTGTATTT	20	6.06826	2.95484	3.76465	hsa-let-7a	3	18	+		4.26258
TGAGGTAGTAGGTTGTGG	18	0.866894	6.40216	4.84027	hsa-let-7a	3	16	+		4.03644
TGAGGTAGTAGGTTGAA	17	1.73379	5.41721	3.22685	hsa-let-7a	3	15	+		3.45928
TGAGGTAGTAGGTTGTATCG	20	0.866894	2.46237	6.45369	hsa-let-7a	3	18	+		3.26098
TGAGGTAGTAGGTTGA	16	3.90102	3.44732	2.15123	hsa-let-7a	3	14	+		3.16652
AGAGGTAGTAGGTTGTATAGT	21	1.73379	3.44732	4.30246	hsa-let-7a	3	19	+		3.16119
TGAGGTAGTAGGTTGTAGG	19	1.30034	5.90968	2.15123	hsa-let-7a	3	17	+		3.12042
TAAGGTAGTAGGTTGTATAGTT	22	0.433447	6.40216	1.61342	hsa-let-7a	3	20	+		2.81634
TGAGGTAGTAGGTTGTATAGGT	22	3.46758	0.984947	3.76465	hsa-let-7a	3	20	+		2.73906
TGAGGTAGTAGGTTGTATAGTTTG	24	0.433447	1.96989	4.30246	hsa-let-7a	3	22	+		2.23527
TTAGGTAGTAGGTTGTATAGTT	22	1.73379	4.43226	0.537808	hsa-let-7a	3	20	+		2.23462
GGAGGTAGTAGGTTGTATAG	20	2.16723	1.47742	2.15123	hsa-let-7a	3	18	+		1.93196
TGAGGTAGTAGGTTGTATATA	21	1.73379	3.44732	0.537808	hsa-let-7a	3	19	+		1.9063
TAAGGTAGTAGGTTGTATAGT	21	1.73379	2.46237	1.07562	hsa-let-7a	3	19	+		1.75726
TCAGGTAGTAGGTTGTATAGTT	22	0	2.95484	2.15123	hsa-let-7a	3	20	+		1.70202
GGAGGTAGTAGGTTGTATAGTTA	23	0.866894	1.47742	2.68904	hsa-let-7a	3	21	+		1.67778
TGAGGTAGTAGGTTGTATAGAC	22	1.30034	1.96989	1.61342	hsa-let-7a	3	20	+		1.62789
TGAGGTAGTAGGTTGTATAGTGG	23	1.30034	1.96989	1.61342	hsa-let-7a	3	21	+		1.62789
TGAGGTAGTAGGTTGTATAGTTCC	24	0	0.984947	3.76465	hsa-let-7a	3	22	+		1.5832
CGAGGTAGTAGGTTGTATAGTTA	23	2.16723	1.96989	0.537808	hsa-let-7a	3	21	+		1.55831
TGAGGTAGTAGGTTGTATAGCA	22	0.433447	0.984947	3.22685	hsa-let-7a	3	20	+		1.54841
TGAGGTAGTAGGTTGTATAGTCA	23	0.866894	2.95484	0.537808	hsa-let-7a	3	21	+		1.45318
TGAGGTAGTAGGTTGTATAAC	21	1.73379	0.984947	1.61342	hsa-let-7a	3	19	+		1.44405
TGAGGTAGTAGGTTGTATAGTCT	23	1.30034	2.46237	0.537808	hsa-let-7a	3	21	+		1.43351
TGAGGTAGTAGGTTGTTT	18	1.73379	2.46237	0	hsa-let-7a	3	16	+		1.39872
AGAGGTAGTAGGTTGCA	17	2.16723	1.47742	0.537808	hsa-let-7a	3	15	+		1.39415
TGAGGTAGTAGGTTGTATTG	20	0.433447	0.984947	2.68904	hsa-let-7a	3	18	+		1.36914
TGAGGTAGTAGGTTGTATAGTTGC	24	1.30034	0	2.68904	hsa-let-7a	3	22	+		1.32979
TTAGGTAGTAGGTTGTATAGT	21	1.30034	0.984947	1.61342	hsa-let-7a	3	19	+		1.29957
AGAGGTAGTAGGTTGTATAGTTA	23	2.16723	0.984947	0.537808	hsa-let-7a	3	21	+		1.23
GGAGGTAGTAGGTTGTATAGA	21	0.433447	1.47742	1.61342	hsa-let-7a	3	19	+		1.17476
AGAGGTAGTAGGTTGTATAGTTT	23	1.30034	1.47742	0.537808	hsa-let-7a	3	21	+		1.10519
TGAGGTAGTAGGTTGTATAGTTCA	24	0	0.492474	2.68904	hsa-let-7a	3	22	+		1.0605
TGAGGTAGTAGGTTGTTA	18	2.16723	0.984947	0	hsa-let-7a	3	16	+		1.05073
TGAGGTAGTAGGTTGTATAGTTTC	24	0.433447	1.96989	0.537808	hsa-let-7a	3	22	+		0.980383
TGAGGTAGTAGGTTGTATAGTTGG	24	0.433447	2.46237	0	hsa-let-7a	3	22	+		0.965272
CGAGGTAGTAGGTTGTATAGTA	22	0.866894	1.96989	0	hsa-let-7a	3	20	+		0.945596
TGAGGTAGTAGGTTGTATAGTTCT	24	0.866894	1.96989	0	hsa-let-7a	3	22	+		0.945596
TGAGGTAGTAGGTTGTATAC	20	2.16723	0	0.537808	hsa-let-7a	3	18	+		0.901681
CGAGGTAGTAGGTTGTATAG	20	0	1.47742	1.07562	hsa-let-7a	3	18	+		0.851012
GGAGGTAGTAGGTTGTATGG	20	0.433447	0.984947	1.07562	hsa-let-7a	3	18	+		0.831336
AGAGGTAGTAGGTTGTATAGA	21	0.433447	0.984947	1.07562	hsa-let-7a	3	19	+		0.831336
AGAGGTAGTAGGTTGTATAG	20	0.433447	1.47742	0.537808	hsa-let-7a	3	18	+		0.816225
TGAGGTAGTAGGTTGTATACT	21	0.433447	1.47742	0.537808	hsa-let-7a	3	19	+		0.816225
CGAGGTAGTAGGTTGTATAGTTT	23	0.433447	1.47742	0.537808	hsa-let-7a	3	21	+		0.816225
TGAGGTAGTAGGTTGTAAC	19	0.433447	1.96989	0	hsa-let-7a	3	17	+		0.801114
GGAGGTAGTAGGTTGTATAGTTT	23	0	0.984947	1.07562	hsa-let-7a	3	21	+		0.686854
GGAGGTAGTAGGTTGTA	17	0.433447	0.984947	0.537808	hsa-let-7a	3	15	+		0.652067
TAAGGTAGTAGGTTGTATAG	20	0.433447	1.47742	0	hsa-let-7a	3	18	+		0.636956
TGAGGTAGTAGGTTGTATC	19	0.866894	0.492474	0.537808	hsa-let-7a	3	17	+		0.632392
TGAGGTAGTAGGTTGTATTC	20	1.30034	0.492474	0	hsa-let-7a	3	18	+		0.597605
TGAGGTAGTAGGTTGTATAGGG	22	0	0.984947	0.537808	hsa-let-7a	3	20	+		0.507585
CGAGGTAGTAGGTTGTATAGAA	22	0	1.47742	0	hsa-let-7a	3	20	+		0.492474
AGAGGTAGTAGGTTGTATAGTA	22	0.433447	0.492474	0.537808	hsa-let-7a	3	20	+		0.487909
TCAGGTAGTAGGTTGTATAGTTA	23	0.866894	0	0.537808	hsa-let-7a	3	21	+		0.468234
AGAGGTAGTAGGTTGTATAA	20	1.30034	0	0	hsa-let-7a	3	18	+		0.433447
TCAGGTAGTAGGTTGTATAGT	21	1.30034	0	0	hsa-let-7a	3	19	+		0.433447
TGAGGTAGTAGGTTGAG	17	0	0	1.07562	hsa-let-7a	3	15	+		0.358538
TGAGGTAGTAGGTTGGG	17	0	0	1.07562	hsa-let-7a	3	15	+		0.358538
CGAGGTAGTAGGTTGTATGA	20	0	0	1.07562	hsa-let-7a	3	18	+		0.358538
GGAGGTAGTAGGTTGTATAGAA	22	0	0	1.07562	hsa-let-7a	3	20	+		0.358538
TGAGGTAGTAGGTTGTATAGTTCG	24	0	0	1.07562	hsa-let-7a	3	22	+		0.358538
GGAGGTAGTAGGTTGTATA	19	0	0.492474	0.537808	hsa-let-7a	3	17	+		0.343427
TGAGGTAGTAGGTTGTACG	19	0	0.492474	0.537808	hsa-let-7a	3	17	+		0.343427
CGAGGTAGTAGGTTGTATAA	20	0	0.492474	0.537808	hsa-let-7a	3	18	+		0.343427
AGAGGTAGTAGGTTGTATAGAA	22	0	0.492474	0.537808	hsa-let-7a	3	20	+		0.343427
AGAGGTAGTAGGTTGTATAGTAA	23	0	0.492474	0.537808	hsa-let-7a	3	21	+		0.343427
CGAGGTAGTAGGTTGTATAGTTG	23	0	0.492474	0.537808	hsa-let-7a	3	21	+		0.343427
TGAGGTAGTAGGTTGTATAGTCG	23	0	0.492474	0.537808	hsa-let-7a	3	21	+		0.343427
CGAGGTAGTAGGTTGTGA	18	0	0.984947	0	hsa-let-7a	3	16	+		0.328316
GGAGGTAGTAGGTTGTATAGTAA	23	0	0.984947	0	hsa-let-7a	3	21	+		0.328316
TTAGGTAGTAGGTTGTATAGTAT	23	0	0.984947	0	hsa-let-7a	3	21	+		0.328316
TGAGGTAGTAGGTTGG	16	0.433447	0	0.537808	hsa-let-7a	3	14	+		0.323751
TGAGGTAGTAGGTTGTGC	18	0.433447	0.492474	0	hsa-let-7a	3	16	+		0.30864
AGAGGTAGTAGGTTGTATA	19	0.433447	0.492474	0	hsa-let-7a	3	17	+		0.30864
CGAGGTAGTAGGTTGTATGG	20	0.433447	0.492474	0	hsa-let-7a	3	18	+		0.30864
GGAGGTAGTAGGTTGTATAGTTG	23	0.433447	0.492474	0	hsa-let-7a	3	21	+		0.30864
TAAGGTAGTAGGTTGTATAGTTA	23	0.433447	0.492474	0	hsa-let-7a	3	21	+		0.30864
TGAGGTAGTAGGTTGTT	17	0.866894	0	0	hsa-let-7a	3	15	+		0.288965
AGAGGTAGTAGGTTGC	16	0	0	0.537808	hsa-let-7a	3	14	+		0.179269
TGAGGTAGTAGGTTTT	16	0	0	0.537808	hsa-let-7a	3	14	+		0.179269
AGAGGTAGTAGGTTGAA	17	0	0	0.537808	hsa-let-7a	3	15	+		0.179269
GGAGGTAGTAGGTTGTAA	18	0	0	0.537808	hsa-let-7a	3	16	+		0.179269
TGAGGTAGTAGGTTGTTG	18	0	0	0.537808	hsa-let-7a	3	16	+		0.179269
CGAGGTAGTAGGTTGTATG	19	0	0	0.537808	hsa-let-7a	3	17	+		0.179269
TGAGGTAGTAGGTTGTATCA	20	0	0	0.537808	hsa-let-7a	3	18	+		0.179269
TGAGGTAGTAGGTTGTATGC	20	0	0	0.537808	hsa-let-7a	3	18	+		0.179269
GGAGGTAGTAGGTTGTATAGG	21	0	0	0.537808	hsa-let-7a	3	19	+		0.179269
TCAGGTAGTAGGTTGTATAGG	21	0	0	0.537808	hsa-let-7a	3	19	+		0.179269
CGAGGTAGTAGGTTGTATAGTAA	23	0	0	0.537808	hsa-let-7a	3	21	+		0.179269
GGAGGTAGTAGGTTGTATAGTGA	23	0	0	0.537808	hsa-let-7a	3	21	+		0.179269
TAAGGTAGTAGGTTGTATAGTAA	23	0	0	0.537808	hsa-let-7a	3	21	+		0.179269
TAAGGTAGTAGGTTGTATAGTGT	23	0	0	0.537808	hsa-let-7a	3	21	+		0.179269
CGAGGTAGTAGGTTGTATAGTTTT	24	0	0	0.537808	hsa-let-7a	3	22	+		0.179269
TGAGGTAGTAGGTTTA	16	0	0.492474	0	hsa-let-7a	3	14	+		0.164158
CGAGGTAGTAGGTTGTGT	18	0	0.492474	0	hsa-let-7a	3	16	+		0.164158
GGAGGTAGTAGGTTGTGT	18	0	0.492474	0	hsa-let-7a	3	16	+		0.164158
CGAGGTAGTAGGTTGTAAA	19	0	0.492474	0	hsa-let-7a	3	17	+		0.164158
TAAGGTAGTAGGTTGTATG	19	0	0.492474	0	hsa-let-7a	3	17	+		0.164158
GGAGGTAGTAGGTTGTATGA	20	0	0.492474	0	hsa-let-7a	3	18	+		0.164158
TAAGGTAGTAGGTTGTATGG	20	0	0.492474	0	hsa-let-7a	3	18	+		0.164158
TAAGGTAGTAGGTTGTATAGA	21	0	0.492474	0	hsa-let-7a	3	19	+		0.164158
TCAGGTAGTAGGTTGTATAGA	21	0	0.492474	0	hsa-let-7a	3	19	+		0.164158
TGAGGTAGTAGGTTGTATATC	21	0	0.492474	0	hsa-let-7a	3	19	+		0.164158
AGAGGTAGTAGGTTGTATAGTG	22	0	0.492474	0	hsa-let-7a	3	20	+		0.164158
GGAGGTAGTAGGTTGTATAGTA	22	0	0.492474	0	hsa-let-7a	3	20	+		0.164158
TCAGGTAGTAGGTTGTATAGGA	22	0	0.492474	0	hsa-let-7a	3	20	+		0.164158
TCAGGTAGTAGGTTGTATAGTA	22	0	0.492474	0	hsa-let-7a	3	20	+		0.164158
TGAGGTAGTAGGTTGTATAGGC	22	0	0.492474	0	hsa-let-7a	3	20	+		0.164158
AGAGGTAGTAGGTTGTATAGTAT	23	0	0.492474	0	hsa-let-7a	3	21	+		0.164158
CGAGGTAGTAGGTTGTATAGTAT	23	0	0.492474	0	hsa-let-7a	3	21	+		0.164158
TGAGGTAGTAGGTTGTATAGTCC	23	0	0.492474	0	hsa-let-7a	3	21	+		0.164158
CGAGGTAGTAGGTTGTAA	18	0.433447	0	0	hsa-let-7a	3	16	+		0.144482
TAAGGTAGTAGGTTGTAT	18	0.433447	0	0	hsa-let-7a	3	16	+		0.144482
TGAGGTAGTAGGTTGTCT	18	0.433447	0	0	hsa-let-7a	3	16	+		0.144482
GGAGGTAGTAGGTTGTATG	19	0.433447	0	0	hsa-let-7a	3	17	+		0.144482
TAAGGTAGTAGGTTGTAAA	19	0.433447	0	0	hsa-let-7a	3	17	+		0.144482
TGAGGTAGTAGGTTGTACT	19	0.433447	0	0	hsa-let-7a	3	17	+		0.144482
AGAGGTAGTAGGTTGTATGG	20	0.433447	0	0	hsa-let-7a	3	18	+		0.144482
TGAGGTAGTAGGTTGTATATG	21	0.433447	0	0	hsa-let-7a	3	19	+		0.144482
CGAGGTAGTAGGTTGTATAGTC	22	0.433447	0	0	hsa-let-7a	3	20	+		0.144482
TAAGGTAGTAGGTTGTATAGTA	22	0.433447	0	0	hsa-let-7a	3	20	+		0.144482
GGAGGTAGTAGGTTGTATAGTAG	23	0.433447	0	0	hsa-let-7a	3	21	+		0.144482
GGAGGTAGTAGGTTGTATAGTAT	23	0.433447	0	0	hsa-let-7a	3	21	+		0.144482
GGAGGTAGTAGGTTGTATAGTCA	23	0.433447	0	0	hsa-let-7a	3	21	+		0.144482
TCAGGTAGTAGGTTGTATAGTAA	23	0.433447	0	0	hsa-let-7a	3	21	+		0.144482
TCAGGTAGTAGGTTGTATAGTTT	23	0.433447	0	0	hsa-let-7a	3	21	+		0.144482
TGAGGTAGTAGGTTGTATAGTGC	23	0.433447	0	0	hsa-let-7a	3	21	+		0.144482
TTAGGTAGTAGGTTGTATAGTAA	23	0.433447	0	0	hsa-let-7a	3	21	+		0.144482
TTAGGTAGTAGGTTGTATAGTTA	23	0.433447	0	0	hsa-let-7a	3	21	+		0.144482
GAGGTAGTAGGTTGTATAGTT	21	364.529	537.289	360.869	hsa-let-7a	4	20	+		420.895
GAGGTAGTAGGTTGTATAGT	20	154.307	250.669	157.04	hsa-let-7a	4	19	+		187.339
GAGGTAGTAGGTTGTATAG	19	35.5426	64.0216	48.9405	hsa-let-7a	4	18	+		49.5016
GAGGTAGTAGGTTGTATAGTTA	22	45.9454	65.499	35.4953	hsa-let-7a	4	21	+		48.9799
GAGGTAGTAGGTTGTATAGTTT	22	31.2082	27.086	13.983	hsa-let-7a	4	21	+		24.0924
GAGGTAGTAGGTTGTATAGTA	21	18.6382	17.729	22.0501	hsa-let-7a	4	20	+		19.4725
GAGGTAGTAGGTTGTATGG	19	17.7713	18.714	12.9074	hsa-let-7a	4	18	+		16.4642
GAGGTAGTAGGTTGTATAGTAA	22	15.1706	13.2968	16.672	hsa-let-7a	4	21	+		15.0465
GAGGTAGTAGGTTGTATAGA	20	6.93515	14.2817	10.2183	hsa-let-7a	4	19	+		10.4784
GAGGTAGTAGGTTGTATAGTTG	22	5.63481	12.3118	9.14273	hsa-let-7a	4	21	+		9.02979
GAGGTAGTAGGTTGTATAGAA	21	4.76792	11.3269	6.9915	hsa-let-7a	4	20	+		7.69544
GAGGTAGTAGGTTGTATAA	19	3.03413	3.93979	3.22685	hsa-let-7a	4	18	+		3.40025
GAGGTAGTAGGTTGTAT	17	1.30034	4.43226	3.76465	hsa-let-7a	4	16	+		3.16575
GAGGTAGTAGGTTGTATAGTG	21	2.16723	2.46237	2.68904	hsa-let-7a	4	20	+		2.43955
GAGGTAGTAGGTTGTAAA	18	1.73379	4.92474	0.537808	hsa-let-7a	4	17	+		2.39878
GAGGTAGTAGGTTGTA	16	1.73379	3.93979	1.07562	hsa-let-7a	4	15	+		2.24973
GAGGTAGTAGGTTGTATAGTAT	22	3.46758	2.46237	0.537808	hsa-let-7a	4	21	+		2.15592
GAGGTAGTAGGTTGTATA	18	2.60068	2.46237	1.07562	hsa-let-7a	4	17	+		2.04622
GAGGTAGTAGGTTGTGT	17	1.30034	2.95484	1.61342	hsa-let-7a	4	16	+		1.9562
GAGGTAGTAGGTTGTGA	17	0	3.44732	2.15123	hsa-let-7a	4	16	+		1.86618
GAGGTAGTAGGTTGTATG	18	0.866894	0.984947	3.22685	hsa-let-7a	4	17	+		1.6929
GAGGTAGTAGGTTGTATAGTGA	22	0	0.984947	3.22685	hsa-let-7a	4	21	+		1.40393
GAGGTAGTAGGTTGTAA	17	0	1.47742	2.15123	hsa-let-7a	4	16	+		1.20955
GAGGTAGTAGGTTGTATAGTTAA	23	0	2.95484	0.537808	hsa-let-7a	4	22	+		1.16422
GAGGTAGTAGGTTGTATGA	19	0	0.984947	2.15123	hsa-let-7a	4	18	+		1.04539
GAGGTAGTAGGTTGTAGA	18	0	1.96989	1.07562	hsa-let-7a	4	17	+		1.01517
TAGGTAGTAGGTTGTATAGTT	21	0.433447	0.984947	1.61342	hsa-let-7a	4	20	+		1.01061
GAGGTAGTAGGTTGTATAGTAG	22	0.866894	0.984947	1.07562	hsa-let-7a	4	21	+		0.975819
GAGGTAGTAGGTTGTATAGTTTA	23	1.30034	0.492474	1.07562	hsa-let-7a	4	22	+		0.956143
GAGGTAGTAGGTTGTATAGTTAT	23	0	0.492474	1.61342	hsa-let-7a	4	22	+		0.701965
GAGGTAGTAGGTTGTAAG	18	0.433447	1.47742	0	hsa-let-7a	4	17	+		0.636956
AAGGTAGTAGGTTGTATAGTT	21	1.30034	0	0.537808	hsa-let-7a	4	20	+		0.612716
GAGGTAGTAGGTTGTATAT	19	1.73379	0	0	hsa-let-7a	4	18	+		0.577929
GGGGTAGTAGGTTGTATAGT	20	0	0.492474	1.07562	hsa-let-7a	4	19	+		0.522696
GAGGTAGTAGGTTGTG	16	0	0.984947	0.537808	hsa-let-7a	4	15	+		0.507585
GAGGTAGTAGGTTGTAG	17	0.433447	0.492474	0.537808	hsa-let-7a	4	16	+		0.487909
GAGGTAGTAGGTTGTATAGTTC	22	0.433447	0.984947	0	hsa-let-7a	4	21	+		0.472798
GGGGTAGTAGGTTGTATAGTT	21	0.866894	0	0.537808	hsa-let-7a	4	20	+		0.468234
AAGGTAGTAGGTTGTATAGT	20	0.866894	0.492474	0	hsa-let-7a	4	19	+		0.453122
GAGGTAGTAGGTTGTATAGAT	21	0.866894	0.492474	0	hsa-let-7a	4	20	+		0.453122
GAGGTAGTAGGTTGTATAGG	20	0	0.492474	0.537808	hsa-let-7a	4	19	+		0.343427
GAGGTAGTAGGTTGTATAGAG	21	0	0.984947	0	hsa-let-7a	4	20	+		0.328316
GAGGTAGTAGGTTGTAAT	18	0.866894	0	0	hsa-let-7a	4	17	+		0.288965
GAGGTAGTAGGTTGTATAAA	20	0.866894	0	0	hsa-let-7a	4	19	+		0.288965
GAGGTAGTAGGTTGTATAGTAC	22	0.866894	0	0	hsa-let-7a	4	21	+		0.288965
GCGGTAGTAGGTTGTATAGTTA	22	0	0	0.537808	hsa-let-7a	4	21	+		0.179269
TAGGTAGTAGGTTGTATAGTTT	22	0	0	0.537808	hsa-let-7a	4	21	+		0.179269
GAGGTAGTAGGTTGTATAGGT	21	0	0.492474	0	hsa-let-7a	4	20	+		0.164158
GAGGTAGTAGGTTGTATAGTGC	22	0	0.492474	0	hsa-let-7a	4	21	+		0.164158
GAGGTAGTAGGTTGTATAGTGT	22	0	0.492474	0	hsa-let-7a	4	21	+		0.164158
GAGGTAGTAGGTTGTATAGTTTT	23	0	0.492474	0	hsa-let-7a	4	22	+		0.164158
GAGGTAGTAGGTTGTATTG	19	0.433447	0	0	hsa-let-7a	4	18	+		0.144482
GAGGTAGTAGGTTGTATAGTC	21	0.433447	0	0	hsa-let-7a	4	20	+		0.144482
GCGGTAGTAGGTTGTATAGTT	21	0.433447	0	0	hsa-let-7a	4	20	+		0.144482
AAGGTAGTAGGTTGTATAGTAA	22	0.433447	0	0	hsa-let-7a	4	21	+		0.144482
AAGGTAGTAGGTTGTATAGTTA	22	0.433447	0	0	hsa-let-7a	4	21	+		0.144482
AGGTAGTAGGTTGTATAGTT	20	49.4129	71.9011	55.932	hsa-let-7a	5	20	+		59.082
AGGTAGTAGGTTGTATAGT	19	24.7065	28.5635	26.8904	hsa-let-7a	5	19	+		26.7201
AGGTAGTAGGTTGTATAGTTA	21	4.33447	8.37205	3.22685	hsa-let-7a	5	21	+		5.31112
AGGTAGTAGGTTGTATAG	18	2.16723	6.89463	6.45369	hsa-let-7a	5	18	+		5.17185
AGGTAGTAGGTTGTATAGTA	20	3.46758	2.46237	4.30246	hsa-let-7a	5	20	+		3.4108
AGGTAGTAGGTTGTATAGTTT	21	2.60068	5.41721	1.61342	hsa-let-7a	5	21	+		3.21044
AGGTAGTAGGTTGTATAGTAA	21	4.76792	2.46237	0.537808	hsa-let-7a	5	21	+		2.58936
AGGTAGTAGGTTGTATAGA	19	0.866894	2.95484	3.76465	hsa-let-7a	5	19	+		2.5288
AGGTAGTAGGTTGTATAGAA	20	1.73379	2.46237	3.22685	hsa-let-7a	5	20	+		2.47433
AGGTAGTAGGTTGTATGG	18	2.16723	2.95484	0.537808	hsa-let-7a	5	18	+		1.88663
AGGTAGTAGGTTGTATAGTTAA	22	3.46758	0.492474	0.537808	hsa-let-7a	5	22	+		1.49929
AGGTAGTAGGTTGTATAGTGA	21	0	1.47742	1.61342	hsa-let-7a	5	21	+		1.03028
AGGTAGTAGGTTGTATAGTTG	21	1.30034	0.492474	1.07562	hsa-let-7a	5	21	+		0.956143
AGGTAGTAGGTTGTATAGAG	20	0.433447	0	1.61342	hsa-let-7a	5	20	+		0.68229
TGGTAGTAGGTTGTATAGTT	20	0.433447	0.492474	1.07562	hsa-let-7a	5	20	+		0.667179
AGGTAGTAGGTTGTAAA	17	0.866894	0.984947	0	hsa-let-7a	5	17	+		0.61728
AGGTAGTAGGTTGTATGA	18	0	0.492474	1.07562	hsa-let-7a	5	18	+		0.522696
AGGTAGTAGGTTGTAA	16	0	0	1.07562	hsa-let-7a	5	16	+		0.358538
AGGTAGTAGGTTGTGA	16	0	0	1.07562	hsa-let-7a	5	16	+		0.358538
AGGTAGTAGGTTGTAT	16	0	0.492474	0.537808	hsa-let-7a	5	16	+		0.343427
TGGTAGTAGGTTGTATAGTA	20	0	0.492474	0.537808	hsa-let-7a	5	20	+		0.343427
AGGTAGTAGGTTGTGT	16	0.433447	0.492474	0	hsa-let-7a	5	16	+		0.30864
AGGTAGTAGGTTGTATA	17	0.433447	0.492474	0	hsa-let-7a	5	17	+		0.30864
AGGTAGTAGGTTGTAGA	17	0	0	0.537808	hsa-let-7a	5	17	+		0.179269
TGGTAGTAGGTTGTAAA	17	0	0	0.537808	hsa-let-7a	5	17	+		0.179269
AGGTAGTAGGTTGTATAA	18	0	0	0.537808	hsa-let-7a	5	18	+		0.179269
AGGTAGTAGGTTGTATAGGT	20	0	0	0.537808	hsa-let-7a	5	20	+		0.179269
AGGTAGTAGGTTGTAC	16	0	0.492474	0	hsa-let-7a	5	16	+		0.164158
AGGTAGTAGGTTGTAGT	17	0	0.492474	0	hsa-let-7a	5	17	+		0.164158
TGGTAGTAGGTTGTATAGT	19	0	0.492474	0	hsa-let-7a	5	19	+		0.164158
TTGTAGTAGGTTGTATAGTTA	21	0	0.492474	0	hsa-let-7a	5	21	+		0.164158
AGGTAGTAGGTTGTAG	16	0.433447	0	0	hsa-let-7a	5	16	+		0.144482
AGGTAGTAGGTTGTATGT	18	0.433447	0	0	hsa-let-7a	5	18	+		0.144482
AGGTAGTAGGTTGTATAAA	19	0.433447	0	0	hsa-let-7a	5	19	+		0.144482
AAGTAGTAGGTTGTATAGTT	20	0.433447	0	0	hsa-let-7a	5	20	+		0.144482
AGGTAGTAGGTTGTATAGAT	20	0.433447	0	0	hsa-let-7a	5	20	+		0.144482
AGGTAGTAGGTTGTATAGTG	20	0.433447	0	0	hsa-let-7a	5	20	+		0.144482
AGGTAGTAGGTTGTATAGTTAT	22	0.433447	0	0	hsa-let-7a	5	22	+		0.144482
AGGTAGTAGGTTGTATAGTTGA	22	0.433447	0	0	hsa-let-7a	5	22	+		0.144482
GGTAGTAGGTTGTATAGTT	19	15.1706	20.6839	19.8989	hsa-let-7a	6	20	+		18.5845
GGTAGTAGGTTGTATAGT	18	3.46758	4.43226	6.9915	hsa-let-7a	6	19	+		4.96378
GGTAGTAGGTTGTATAGTTA	20	0	3.44732	1.61342	hsa-let-7a	6	21	+		1.68691
GGTAGTAGGTTGTATAG	17	0.433447	1.96989	1.61342	hsa-let-7a	6	18	+		1.33892
TGTAGTAGGTTGTATAGT	18	0	1.96989	0.537808	hsa-let-7a	6	19	+		0.835901
GGTAGTAGGTTGTATAGTTT	20	0.866894	1.47742	0	hsa-let-7a	6	21	+		0.781438
GGTAGTAGGTTGTATAGTTG	20	1.73379	0	0	hsa-let-7a	6	21	+		0.577929
GGTAGTAGGTTGTATAGTTAA	21	1.73379	0	0	hsa-let-7a	6	22	+		0.577929
GGTAGTAGGTTGTATAGTAA	20	0	0.492474	1.07562	hsa-let-7a	6	21	+		0.522696
GGTAGTAGGTTGTATAGTTAT	21	0.433447	0	1.07562	hsa-let-7a	6	22	+		0.503021
GGTAGTAGGTTGTATAGAA	19	0.433447	0.492474	0.537808	hsa-let-7a	6	20	+		0.487909
TGTAGTAGGTTGTATAGTT	19	0.866894	0.492474	0	hsa-let-7a	6	20	+		0.453122
TCTAGTAGGTTGTATAGTA	19	1.30034	0	0	hsa-let-7a	6	20	+		0.433447
AGTAGTAGGTTGTATAGTTAA	21	1.30034	0	0	hsa-let-7a	6	22	+		0.433447
GGTAGTAGGTTGTAAA	16	0	0	1.07562	hsa-let-7a	6	17	+		0.358538
GGTAGTAGGTTGTATA	16	0	0.492474	0.537808	hsa-let-7a	6	17	+		0.343427
AGTAGTAGGTTGTATAGT	18	0.866894	0	0	hsa-let-7a	6	19	+		0.288965
GGTAGTAGGTTGTAGA	16	0	0	0.537808	hsa-let-7a	6	17	+		0.179269
GGTAGTAGGTTGTATGA	17	0	0	0.537808	hsa-let-7a	6	18	+		0.179269
GGTAGTAGGTTGTATAA	17	0	0.492474	0	hsa-let-7a	6	18	+		0.164158
GGTAGTAGGTTGTATAGA	18	0	0.492474	0	hsa-let-7a	6	19	+		0.164158
GGTAGTAGGTTGTATAGTA	19	0	0.492474	0	hsa-let-7a	6	20	+		0.164158
GGTAGTAGGTTGTATGG	17	0.433447	0	0	hsa-let-7a	6	18	+		0.144482
ACTAGTAGGTTGTATAGTT	19	0.433447	0	0	hsa-let-7a	6	20	+		0.144482
AGTAGTAGGTTGTATAGTT	19	0.433447	0	0	hsa-let-7a	6	20	+		0.144482
CGTAGTAGGTTGTATAGTT	19	0.433447	0	0	hsa-let-7a	6	20	+		0.144482
AGTAGTAGGTTGTATAGTAT	20	0.433447	0	0	hsa-let-7a	6	21	+		0.144482
AGTAGTAGGTTGTATAGTTA	20	0.433447	0	0	hsa-let-7a	6	21	+		0.144482
GTAGTAGGTTGTATAGTT	18	17.7713	35.4581	39.2599	hsa-let-7a	7	20	+		30.8298
GTAGTAGGTTGTATAGT	17	7.3686	9.357	8.06711	hsa-let-7a	7	19	+		8.26424
GTAGTAGGTTGTATAGTTA	19	3.90102	2.95484	4.30246	hsa-let-7a	7	21	+		3.71944
GTAGTAGGTTGTATAG	16	0	2.46237	0.537808	hsa-let-7a	7	18	+		1.00006
GTAGTAGGTTGTATAGTAA	19	0.433447	0.492474	1.61342	hsa-let-7a	7	21	+		0.846448
GTAGTAGGTTGTATAGA	17	0.433447	1.96989	0	hsa-let-7a	7	19	+		0.801114
GTAGTAGGTTGTATAGTTT	19	0	0.984947	1.07562	hsa-let-7a	7	21	+		0.686854
GTAGTAGGTTGTATAGTTGC	20	0	0	1.61342	hsa-let-7a	7	22	+		0.537808
GTAGTAGGTTGTATAGTA	18	0	0.492474	0.537808	hsa-let-7a	7	20	+		0.343427
GTAGTAGGTTGTATGG	16	0.433447	0.492474	0	hsa-let-7a	7	18	+		0.30864
AAAGTAGGTTGTATAGT	17	0.866894	0	0	hsa-let-7a	7	19	+		0.288965
ATAGTAGGTTGTATAGT	17	0.866894	0	0	hsa-let-7a	7	19	+		0.288965
GGAGTAGGTTGTATAGT	17	0	0	0.537808	hsa-let-7a	7	19	+		0.179269
GGAGTAGGTTGTATAGTT	18	0	0	0.537808	hsa-let-7a	7	20	+		0.179269
GTAGTAGGTTGTATAGTAG	19	0	0	0.537808	hsa-let-7a	7	21	+		0.179269
GTAGTAGGTTGTATAAT	17	0	0.492474	0	hsa-let-7a	7	19	+		0.164158
GTAGTAGGTTGTATAGAT	18	0	0.492474	0	hsa-let-7a	7	20	+		0.164158
GTAGTAGGTTGTATAGTTG	19	0	0.492474	0	hsa-let-7a	7	21	+		0.164158
GTAGTAGGTTGTATAGTTAA	20	0	0.492474	0	hsa-let-7a	7	22	+		0.164158
ATAGTAGGTTGTATAGTT	18	0.433447	0	0	hsa-let-7a	7	20	+		0.144482
TTAGTAGGTTGTATAGTT	18	0.433447	0	0	hsa-let-7a	7	20	+		0.144482
GTAGTAGGTTGTATAGTAT	19	0.433447	0	0	hsa-let-7a	7	21	+		0.144482
TGAGTAGGTTGTATAGTTA	19	0.433447	0	0	hsa-let-7a	7	21	+		0.144482
TAGTAGGTTGTATAGTT	17	4.33447	4.92474	12.9074	hsa-let-7a	8	20	+		7.38886
TAGTAGGTTGTATAGT	16	2.60068	1.96989	3.76465	hsa-let-7a	8	19	+		2.77841
TAGTAGGTTGTATAGTTT	18	0	0.984947	1.07562	hsa-let-7a	8	21	+		0.686854
TAGTAGGTTGTATAGTAT	18	0	0.492474	0.537808	hsa-let-7a	8	21	+		0.343427
TAGTAGGTTGTATAGA	16	0	0	0.537808	hsa-let-7a	8	19	+		0.179269
TAGTAGGTTGTATAGAA	17	0	0	0.537808	hsa-let-7a	8	20	+		0.179269
TAGTAGGTTGTATAGTTG	18	0	0	0.537808	hsa-let-7a	8	21	+		0.179269
TAGTAGGTTGTATAGTTAG	19	0	0	0.537808	hsa-let-7a	8	22	+		0.179269
GAGTAGGTTGTATAGTT	17	0	0.492474	0	hsa-let-7a	8	20	+		0.164158
TAGTAGGTTGTATAGTA	17	0	0.492474	0	hsa-let-7a	8	20	+		0.164158
TAGTAGGTTGTATAGTAA	18	0	0.492474	0	hsa-let-7a	8	21	+		0.164158
CAGTAGGTTGTATAGTT	17	0.433447	0	0	hsa-let-7a	8	20	+		0.144482
TAGTAGGTTGTATAGTTA	18	0.433447	0	0	hsa-let-7a	8	21	+		0.144482
AGTAGGTTGTATAGTT	16	2.16723	0.984947	3.76465	hsa-let-7a	9	20	+		2.30561
AGTAGGTTGTATAGTTA	17	2.16723	0	0.537808	hsa-let-7a	9	21	+		0.901681
AGTAGGTTGTATAGTTT	17	0.433447	0	0.537808	hsa-let-7a	9	21	+		0.323751
AGTAGGTTGTATAGTA	16	0	0.492474	0	hsa-let-7a	9	20	+		0.164158
AGTAGGTTGTATAGTG	16	0.433447	0	0	hsa-let-7a	9	20	+		0.144482
GGAGGTTGTATAGTTA	16	0.866894	1.96989	1.61342	hsa-let-7a	10	21	+		1.4834
GTAGGTTGTATAGTTA	16	1.73379	1.47742	0.537808	hsa-let-7a	10	21	+		1.24967
GTAGGTTGTATAGTTT	16	0.433447	0.984947	0	hsa-let-7a	10	21	+		0.472798
GGAGGTTGTATAGTTG	16	0	0	1.07562	hsa-let-7a	10	21	+		0.358538
GTAGGTTGTATAGTAA	16	0.433447	0.492474	0	hsa-let-7a	10	21	+		0.30864
GTAGGTTGTATAGTAT	16	0.866894	0	0	hsa-let-7a	10	21	+		0.288965
GGAGGTTGTATAGTAA	16	0	0	0.537808	hsa-let-7a	10	21	+		0.179269
GGAGGTTGTATAGTAT	16	0	0	0.537808	hsa-let-7a	10	21	+		0.179269
GTAGGTTGTATAGTTTT	17	0	0.492474	0	hsa-let-7a	10	22	+		0.164158
CTAGGTTGTATAGTTC	16	0.433447	0	0	hsa-let-7a	10	21	+		0.144482
GTAGTAGATTGTATAGTT	18	6.5017	12.3118	9.14273	hsa-let-7a*	1	14	-		9.31876
TAGTAGATTGTATAGTT	17	1.73379	1.47742	2.15123	hsa-let-7a*	1	13	-		1.78748
AGTAGATTGTATAGTT	16	0.866894	1.47742	2.15123	hsa-let-7a*	1	12	-		1.49851
AACTATACAATCTACTGTCTTT	22	0	1.47742	0	hsa-let-7a*	1	18	+		0.492474
AAGTAGATTGTATAGTA	17	0.866894	0	0	hsa-let-7a*	1	13	-		0.288965
ATAGTAGATTGTATAGTT	18	0	0	0.537808	hsa-let-7a*	1	14	-		0.179269
GTAGTAGATTGTATAGTA	18	0	0	0.537808	hsa-let-7a*	1	14	-		0.179269
GGAGTAGATTGTATAGTT	18	0	0.492474	0	hsa-let-7a*	1	14	-		0.164158
AACTATACAATCTACTGTCTTTC	23	0	0.492474	0	hsa-let-7a*	1	19	+		0.164158
AAGTAGATTGTATAGTT	17	0.433447	0	0	hsa-let-7a*	1	13	-		0.144482
CAGTAGATTGTATAGTT	17	0.433447	0	0	hsa-let-7a*	1	13	-		0.144482
CTCTATACAATCTACTGTCTTTC	23	0.433447	0	0	hsa-let-7a*	1	19	+		0.144482
GTAGTAGATTGTATAGT	17	4.76792	5.90968	2.15123	hsa-let-7a*	2	14	-		4.27628
TAGTAGATTGTATAGT	16	0	0.492474	0.537808	hsa-let-7a*	2	13	-		0.343427
ACTATACAATCTACTGTCTTTCT	23	0	0.984947	0	hsa-let-7a*	2	20	+		0.328316
ACTATACAATCTACTGTCTTTC	22	0	0	0.537808	hsa-let-7a*	2	19	+		0.179269
TCTATACAATCTACTGTCTTTC	22	0	0.492474	0	hsa-let-7a*	2	19	+		0.164158
CAGTAGATTGTATAGT	16	0.433447	0	0	hsa-let-7a*	2	13	-		0.144482
GTAGTAGATTGTATAAA	17	0.433447	0	0	hsa-let-7a*	2	14	-		0.144482
CTATACAATCTACTGTCTTTCT	22	115.73	227.523	229.106	hsa-let-7a*	3	20	+		190.786
CTATACAATCTACTGTCTTTC	21	60.2491	128.043	181.779	hsa-let-7a*	3	19	+		123.357
CTATACAATCTACTGTCTTTCC	22	51.1467	55.157	61.3101	hsa-let-7a*	3	20	+		55.8713
CTATACAATCTACTGTCTTT	20	24.273	36.443	50.5539	hsa-let-7a*	3	18	+		37.09
CTATACAATCTACTGTCTTTCA	22	8.66894	17.2366	14.5208	hsa-let-7a*	3	20	+		13.4754
CTATACAATCTACTGTCTTTCCA	23	8.23549	16.7441	8.06711	hsa-let-7a*	3	21	+		11.0156
CTATACAATCTACTGTCTTTTT	22	3.03413	3.93979	4.30246	hsa-let-7a*	3	20	+		3.75879
CTATACAATCTACTGTCTTTCCT	23	0.866894	3.44732	3.76465	hsa-let-7a*	3	21	+		2.69295
CTATACAATCTACTGTCTT	19	0	2.95484	2.15123	hsa-let-7a*	3	17	+		1.70202
CTATACAATCTACTGTCTTTT	21	1.30034	0.984947	2.15123	hsa-let-7a*	3	19	+		1.47884
CTATACAATCTACTGTCT	18	0	0.984947	3.22685	hsa-let-7a*	3	16	+		1.40393
CTATACAATCTACTGTCTTTCTA	23	1.73379	1.96989	0	hsa-let-7a*	3	21	+		1.23456
CTATACAATCTACTGTCTTTCTT	23	0	2.46237	0.537808	hsa-let-7a*	3	21	+		1.00006
CTATACAATCTACTGTCTTTCG	22	0	1.96989	0.537808	hsa-let-7a*	3	20	+		0.835901
CTATACAATCTACTGTCTTTA	21	0.866894	0	1.07562	hsa-let-7a*	3	19	+		0.647503
CTATACAATCTACTGTCTTTCCC	23	1.30034	0	0	hsa-let-7a*	3	21	+		0.433447
CTATACAATCTACTGTC	17	0	0.492474	0.537808	hsa-let-7a*	3	15	+		0.343427
CTATACAATCTACTGTCTTTCTC	23	0	0.492474	0.537808	hsa-let-7a*	3	21	+		0.343427
CTATACAATCTACTGTCTTA	20	0	0.984947	0	hsa-let-7a*	3	18	+		0.328316
CTATACAATCTACTGTCTTTAA	22	0	0.984947	0	hsa-let-7a*	3	20	+		0.328316
GTAGTAGATTGTATAG	16	0.866894	0	0	hsa-let-7a*	3	14	-		0.288965
CTATACAATCTACTGTCTA	19	0.866894	0	0	hsa-let-7a*	3	17	+		0.288965
CTATACAATCTACTGTCTTC	20	0.866894	0	0	hsa-let-7a*	3	18	+		0.288965
CTATACAATCTACTGTCTTAA	21	0	0	0.537808	hsa-let-7a*	3	19	+		0.179269
CTATACAATCTACTGTCTTCC	21	0	0	0.537808	hsa-let-7a*	3	19	+		0.179269
CCATACAATCTACTGTCTTTCT	22	0	0	0.537808	hsa-let-7a*	3	20	+		0.179269
CTATACAATCTACTGTCTTTAT	22	0	0	0.537808	hsa-let-7a*	3	20	+		0.179269
CTATACAATCTACTGTCTTTCAA	23	0	0	0.537808	hsa-let-7a*	3	21	+		0.179269
TATACAATCTACTGTCTTTCCT	22	7.3686	12.3118	13.983	hsa-let-7a*	4	21	+		11.2211
TATACAATCTACTGTCTTTC	20	1.73379	6.40216	9.68054	hsa-let-7a*	4	19	+		5.93883
TATACAATCTACTGTCTTTCC	21	3.03413	5.41721	9.14273	hsa-let-7a*	4	20	+		5.86469
TATACAATCTACTGTCTTTCCA	22	1.30034	6.89463	1.07562	hsa-let-7a*	4	21	+		3.0902
TATACAATCTACTGTCTTTCT	21	0	4.92474	1.61342	hsa-let-7a*	4	20	+		2.17939
TATACAATCTACTGTCTTT	19	0	0.984947	2.68904	hsa-let-7a*	4	18	+		1.22466
TATACAATCTACTGTCTT	18	0	0.492474	1.07562	hsa-let-7a*	4	17	+		0.522696
TATACAATCTACTGTCTTTCA	21	0.433447	0	0.537808	hsa-let-7a*	4	20	+		0.323751
TATACAATCTACTGTCTTTA	20	0	0.492474	0	hsa-let-7a*	4	19	+		0.164158
TATACAATCTACTGTCTTTT	20	0	0.492474	0	hsa-let-7a*	4	19	+		0.164158
TATACAATCTACTGTC	16	0.433447	0	0	hsa-let-7a*	4	15	+		0.144482
TATACAATCTACTGTCTTTCTT	22	0.433447	0	0	hsa-let-7a*	4	21	+		0.144482
ATACAATCTACTGTCTTTCCT	21	0	1.47742	2.68904	hsa-let-7a*	5	21	+		1.38882
ATACAATCTACTGTCTTTCC	20	0	0.492474	0.537808	hsa-let-7a*	5	20	+		0.343427
ATACAATCTACTGTCTTTCCA	21	0	0	0.537808	hsa-let-7a*	5	21	+		0.179269
ATACAATCTACTGTCTTTCCC	21	0	0	0.537808	hsa-let-7a*	5	21	+		0.179269
ATACAATCTACTGTCTTTCT	20	0.433447	0	0	hsa-let-7a*	5	20	+		0.144482
TACAATCTACTGTCTTTCCT	20	0	0	0.537808	hsa-let-7a*	6	21	+		0.179269
TACAATCTACTGTCTTTC	18	0	0.492474	0	hsa-let-7a*	6	19	+		0.164158
ACTGTACAGCCTCCTAGCTTTC	22	1.73379	2.46237	0.537808	hsa-let-7a-2*	2	19	+		1.57799
ACTGTACAGCCTCCTAGCTTT	21	0	0.984947	0	hsa-let-7a-2*	2	18	+		0.328316
CTGTACAGCCTCCTAGCTTTCC	22	6.93515	7.3871	10.2183	hsa-let-7a-2*	3	20	+		8.1802
CTGTACAGCCTCCTAGCTTTC	21	4.76792	4.92474	7.52931	hsa-let-7a-2*	3	19	+		5.74065
CTGTACAGCCTCCTAGCTTT	20	1.73379	2.46237	4.84027	hsa-let-7a-2*	3	18	+		3.01214
CTGTACAGCCTCCTAGCTTTCCA	23	0	0	2.68904	hsa-let-7a-2*	3	21	+		0.896346
CTGTACAGCCTCCTAGCTTTCA	22	0	0.492474	1.61342	hsa-let-7a-2*	3	20	+		0.701965
CTGTACAGCCTCCTAGCTTTCT	22	0.433447	0.492474	1.07562	hsa-let-7a-2*	3	20	+		0.667179
CTGTACAGCCTCCTAGCT	18	0	0	1.07562	hsa-let-7a-2*	3	16	+		0.358538
CTGTACAGCCTCCTAGCTTTAG	22	0	0	1.07562	hsa-let-7a-2*	3	20	+		0.358538
CTGTACAGCCTCCTAGCTT	19	0	0.984947	0	hsa-let-7a-2*	3	17	+		0.328316
CTGTACAGCCTCCTAG	16	0	0	0.537808	hsa-let-7a-2*	3	14	+		0.179269
CTGTACAGCCTCCTAGCTTTA	21	0	0.492474	0	hsa-let-7a-2*	3	19	+		0.164158
CTGTACAGCCTCCTAGCTAA	20	0.433447	0	0	hsa-let-7a-2*	3	18	+		0.144482
GTACAGCCTCCTAGCTTTCC	20	0	0.492474	0	hsa-let-7a-2*	5	20	+		0.164158
AATGAGGTAGTAGGTTGTGTGGTT	24	17.3379	0.984947	0	hsa-let-7b	1	20	+		6.10761
AATGAGGTAGTAGGTTGTGTGGTTA	25	3.46758	1.47742	1.61342	hsa-let-7b	1	21	+		2.18614
AATGAGGTAGTAGGTTGTGTGGTAA	25	5.20136	0	0.537808	hsa-let-7b	1	21	+		1.91306
AATGAGGTAGTAGGTTGTGTGGTTT	25	4.33447	0	0.537808	hsa-let-7b	1	21	+		1.62409
AATGAGGTAGTAGGTTGTGTGGT	23	0.433447	1.96989	1.07562	hsa-let-7b	1	19	+		1.15965
ATTGAGGTAGTAGGTTGTGTGGTTT	25	3.46758	0	0	hsa-let-7b	1	21	+		1.15586
AATGAGGTAGTAGGTTGTGTGG	22	3.03413	0	0	hsa-let-7b	1	18	+		1.01138
TCTGAGGTAGTAGGTTGTGTGGTT	24	1.30034	0	1.61342	hsa-let-7b	1	20	+		0.971254
AATGAGGTAGTAGGTTGTGTGGTTAA	26	2.16723	0	0	hsa-let-7b	1	22	+		0.722412
AATGAGGTAGTAGGTTGTGTGGTTAT	26	2.16723	0	0	hsa-let-7b	1	22	+		0.722412
CCTGAGGTAGTAGGTTGTGTGGTT	24	1.30034	0	0.537808	hsa-let-7b	1	20	+		0.612716
CATGAGGTAGTAGGTTGTGTGGTT	24	1.30034	0.492474	0	hsa-let-7b	1	20	+		0.597605
TATGAGGTAGTAGGTTGTGTGGTT	24	1.73379	0	0	hsa-let-7b	1	20	+		0.577929
ACTGAGGTAGTAGGTTGTGTGGTTT	25	1.73379	0	0	hsa-let-7b	1	21	+		0.577929
CATGAGGTAGTAGGTTGTGTGGTAA	25	1.73379	0	0	hsa-let-7b	1	21	+		0.577929
CCTGAGGTAGTAGGTTGTGTGGTAG	25	1.73379	0	0	hsa-let-7b	1	21	+		0.577929
GTTGAGGTAGTAGGTTGTGTGGTAA	25	1.73379	0	0	hsa-let-7b	1	21	+		0.577929
ATTGAGGTAGTAGGTTGTGTGGTA	24	0	0	1.61342	hsa-let-7b	1	20	+		0.537808
GTTGAGGTAGTAGGTTGTGTGGTTA	25	0	1.47742	0	hsa-let-7b	1	21	+		0.492474
CCTGAGGTAGTAGGTTGTGTGGT	23	0.433447	0.984947	0	hsa-let-7b	1	19	+		0.472798
CTTGAGGTAGTAGGTTGTGTGGTTT	25	0.866894	0	0.537808	hsa-let-7b	1	21	+		0.468234
GTTGAGGTAGTAGGTTGTA	19	0.866894	0.492474	0	hsa-let-7b	1	15	+		0.453122
ATTGAGGTAGTAGGTTGTGTGGTT	24	1.30034	0	0	hsa-let-7b	1	20	+		0.433447
CATGAGGTAGTAGGTTGTGTGGTA	24	1.30034	0	0	hsa-let-7b	1	20	+		0.433447
AATGAGGTAGTAGGTTGTGTGGTAT	25	1.30034	0	0	hsa-let-7b	1	21	+		0.433447
CTTGAGGTAGTAGGTTGTGTGGTAT	25	1.30034	0	0	hsa-let-7b	1	21	+		0.433447
GATGAGGTAGTAGGTTGTGTGGTTA	25	1.30034	0	0	hsa-let-7b	1	21	+		0.433447
GCTGAGGTAGTAGGTTGTGTGGTTA	25	1.30034	0	0	hsa-let-7b	1	21	+		0.433447
CCTGAGGTAGTAGGTTGTGTGGTTT	25	0	0	1.07562	hsa-let-7b	1	21	+		0.358538
CATGAGGTAGTAGGTTGTGTGGT	23	0.866894	0	0	hsa-let-7b	1	19	+		0.288965
AATGAGGTAGTAGGTTGTGTGGAA	24	0.866894	0	0	hsa-let-7b	1	20	+		0.288965
AATGAGGTAGTAGGTTGTGTGGTA	24	0.866894	0	0	hsa-let-7b	1	20	+		0.288965
ACTGAGGTAGTAGGTTGTGTGGTT	24	0.866894	0	0	hsa-let-7b	1	20	+		0.288965
CTTGAGGTAGTAGGTTGTGTGGTA	24	0.866894	0	0	hsa-let-7b	1	20	+		0.288965
GATGAGGTAGTAGGTTGTGTGGTT	24	0.866894	0	0	hsa-let-7b	1	20	+		0.288965
TTTGAGGTAGTAGGTTGTGTGGTT	24	0.866894	0	0	hsa-let-7b	1	20	+		0.288965
AGTGAGGTAGTAGGTTGTGTGGTTA	25	0.866894	0	0	hsa-let-7b	1	21	+		0.288965
CTTGAGGTAGTAGGTTGTGTGGTTA	25	0.866894	0	0	hsa-let-7b	1	21	+		0.288965
AATGAGGTAGTAGGTTGTGTGGTTTT	26	0.866894	0	0	hsa-let-7b	1	22	+		0.288965
AGTGAGGTAGTAGGTTGTGTGGTTAA	26	0.866894	0	0	hsa-let-7b	1	22	+		0.288965
CATGAGGTAGTAGGTTGTGTGGTTAT	26	0.866894	0	0	hsa-let-7b	1	22	+		0.288965
GGTGAGGTAGTAGGTTGTGTGG	22	0	0	0.537808	hsa-let-7b	1	18	+		0.179269
ACTGAGGTAGTAGGTTGTGTGGA	23	0	0	0.537808	hsa-let-7b	1	19	+		0.179269
TTTGAGGTAGTAGGTTGTGTGGT	23	0	0	0.537808	hsa-let-7b	1	19	+		0.179269
CATGAGGTAGTAGGTTGTGTGG	22	0	0.492474	0	hsa-let-7b	1	18	+		0.164158
GCTGAGGTAGTAGGTTGTGTGGT	23	0	0.492474	0	hsa-let-7b	1	19	+		0.164158
AATGAGGTAGTAGGTTGTGTGGTGA	25	0	0.492474	0	hsa-let-7b	1	21	+		0.164158
AATGAGGTAGTAGGTT	16	0.433447	0	0	hsa-let-7b	1	12	+		0.144482
TTTGAGGTAGTAGGTTGTCT	20	0.433447	0	0	hsa-let-7b	1	16	+		0.144482
CCTGAGGTAGTAGGTTGTGTGG	22	0.433447	0	0	hsa-let-7b	1	18	+		0.144482
TTTGAGGTAGTAGGTTGTGTGG	22	0.433447	0	0	hsa-let-7b	1	18	+		0.144482
ACTGAGGTAGTAGGTTGTGTGGT	23	0.433447	0	0	hsa-let-7b	1	19	+		0.144482
TATGAGGTAGTAGGTTGTGTGGA	23	0.433447	0	0	hsa-let-7b	1	19	+		0.144482
CCTGAGGTAGTAGGTTGTGTGGTA	24	0.433447	0	0	hsa-let-7b	1	20	+		0.144482
CGTGAGGTAGTAGGTTGTGTGGTT	24	0.433447	0	0	hsa-let-7b	1	20	+		0.144482
GTTGAGGTAGTAGGTTGTGTGGTT	24	0.433447	0	0	hsa-let-7b	1	20	+		0.144482
ATTGAGGTAGTAGGTTGTGTGGTAT	25	0.433447	0	0	hsa-let-7b	1	21	+		0.144482
ATTGAGGTAGTAGGTTGTGTGGTTA	25	0.433447	0	0	hsa-let-7b	1	21	+		0.144482
GCTGAGGTAGTAGGTTGTGTGGTTT	25	0.433447	0	0	hsa-let-7b	1	21	+		0.144482
TATGAGGTAGTAGGTTGTGTGGTTT	25	0.433447	0	0	hsa-let-7b	1	21	+		0.144482
AATGAGGTAGTAGGTTGTGTGGTTGA	26	0.433447	0	0	hsa-let-7b	1	22	+		0.144482
AATGAGGTAGTAGGTTGTGTGGTTTA	26	0.433447	0	0	hsa-let-7b	1	22	+		0.144482
ACTGAGGTAGTAGGTTGTGTGGTTGT	26	0.433447	0	0	hsa-let-7b	1	22	+		0.144482
ATTGAGGTAGTAGGTTGTGTGGTTAG	26	0.433447	0	0	hsa-let-7b	1	22	+		0.144482
ATGAGGTAGTAGGTTGTGTGGTT	23	86.6894	12.8043	11.8318	hsa-let-7b	2	20	+		37.1085
ATGAGGTAGTAGGTTGTGTGGTTT	24	42.0444	3.44732	1.07562	hsa-let-7b	2	21	+		15.5224
CTGAGGTAGTAGGTTGTGTGGTT	23	16.471	15.7592	13.4452	hsa-let-7b	2	20	+		15.2251
ATGAGGTAGTAGGTTGTGTGGTTA	24	23.4061	3.93979	8.60492	hsa-let-7b	2	21	+		11.9836
ATGAGGTAGTAGGTTGTGTGGT	22	23.8396	3.93979	4.84027	hsa-let-7b	2	19	+		10.8732
TTGAGGTAGTAGGTTGTGTGGTT	23	9.10239	6.89463	8.06711	hsa-let-7b	2	20	+		8.02138
ATGAGGTAGTAGGTTGTGTGG	21	13.0034	6.89463	1.61342	hsa-let-7b	2	18	+		7.17049
GTGAGGTAGTAGGTTGTGTGGTT	23	4.76792	6.40216	6.9915	hsa-let-7b	2	20	+		6.05386
CTGAGGTAGTAGGTTGTGTGGTTT	24	6.5017	3.93979	4.84027	hsa-let-7b	2	21	+		5.09392
ATGAGGTAGTAGGTTGTGTGGTAA	24	12.57	1.47742	1.07562	hsa-let-7b	2	21	+		5.041
CTGAGGTAGTAGGTTGTGTGGT	22	2.60068	4.43226	6.9915	hsa-let-7b	2	19	+		4.67481
TTGAGGTAGTAGGTTGTGTGGT	22	6.06826	3.93979	2.68904	hsa-let-7b	2	19	+		4.23236
ATGAGGTAGTAGGTTGTGTGGTAT	24	8.66894	0.492474	2.68904	hsa-let-7b	2	21	+		3.95015
ATGAGGTAGTAGGTTGTGTGGTTAT	25	9.10239	0.492474	2.15123	hsa-let-7b	2	22	+		3.91536
ATGAGGTAGTAGGTTGTGTGGTA	23	6.93515	1.47742	2.15123	hsa-let-7b	2	20	+		3.52127
ATGAGGTAGTAGGTTGTGTGGTTAA	25	10.4027	0	0	hsa-let-7b	2	22	+		3.46758
TTGAGGTAGTAGGTTGTGTGGTTT	24	5.20136	2.95484	1.61342	hsa-let-7b	2	21	+		3.25654
CTGAGGTAGTAGGTTGTGTGG	21	3.90102	2.95484	2.15123	hsa-let-7b	2	18	+		3.00236
CTGAGGTAGTAGGTTGTGTGGTTA	24	3.90102	3.44732	1.07562	hsa-let-7b	2	21	+		2.80798
TTGAGGTAGTAGGTTGTGTGGTAA	24	3.90102	3.44732	1.07562	hsa-let-7b	2	21	+		2.80798
ATGAGGTAGTAGGTTGTGTGGTTTT	25	7.3686	0	0	hsa-let-7b	2	22	+		2.4562
TTGAGGTAGTAGGTTGTGTGG	21	2.60068	2.46237	2.15123	hsa-let-7b	2	18	+		2.40476
GTGAGGTAGTAGGTTGTGTGGT	22	2.16723	2.95484	1.61342	hsa-let-7b	2	19	+		2.24517
TTGAGGTAGTAGGTTGTGTGGTTA	24	3.46758	2.46237	0.537808	hsa-let-7b	2	21	+		2.15592
GTGAGGTAGTAGGTTGTGTGGTTT	24	1.73379	1.96989	2.68904	hsa-let-7b	2	21	+		2.13091
CTGAGGTAGTAGGTTGTGTGGTAT	24	3.03413	1.47742	1.07562	hsa-let-7b	2	21	+		1.86239
CTGAGGTAGTAGGTTGTGTGGTA	23	3.90102	0	1.61342	hsa-let-7b	2	20	+		1.83815
ATGAGGTAGTAGGTTGTAT	19	4.76792	0	0	hsa-let-7b	2	16	+		1.58931
TTGAGGTAGTAGGTTGTAT	19	0.433447	1.96989	2.15123	hsa-let-7b	2	16	+		1.51819
CTGAGGTAGTAGGTTGTGTGGTAA	24	1.30034	1.96989	1.07562	hsa-let-7b	2	21	+		1.44862
TTGAGGTAGTAGGTTGTGTGGTTTT	25	0	0	4.30246	hsa-let-7b	2	22	+		1.43415
TTGAGGTAGTAGGTTGTGTGGTTAT	25	1.73379	2.46237	0	hsa-let-7b	2	22	+		1.39872
ATGAGGTAGTAGGTTGTGTGGTTG	24	3.90102	0	0	hsa-let-7b	2	21	+		1.30034
TTGAGGTAGTAGGTTGTA	18	0.866894	2.95484	0	hsa-let-7b	2	15	+		1.27391
TTGAGGTAGTAGGTTGTAA	19	0.866894	1.47742	1.07562	hsa-let-7b	2	16	+		1.13998
GTGAGGTAGTAGGTTGTGTGGTTA	24	1.30034	1.96989	0	hsa-let-7b	2	21	+		1.09008
ATGAGGTAGTAGGTTGTGTGGTTTA	25	0.866894	1.96989	0	hsa-let-7b	2	22	+		0.945596
ATGAGGTAGTAGGTTGTGTAA	21	1.73379	0.492474	0.537808	hsa-let-7b	2	18	+		0.921356
TTGAGGTAGTAGGTTGTGTGGTTG	24	1.73379	0.492474	0.537808	hsa-let-7b	2	21	+		0.921356
ATGAGGTAGTAGGTTGTGTGA	21	2.16723	0.492474	0	hsa-let-7b	2	18	+		0.886569
ATGAGGTAGTAGGTTGTGTGGA	22	0.433447	0.492474	1.61342	hsa-let-7b	2	19	+		0.846448
GTGAGGTAGTAGGTTGTAT	19	0	1.96989	0.537808	hsa-let-7b	2	16	+		0.835901
GTGAGGTAGTAGGTTGTGTGGTA	23	0.433447	1.96989	0	hsa-let-7b	2	20	+		0.801114
ATGAGGTAGTAGGTTGTGTGGAA	23	1.30034	0	1.07562	hsa-let-7b	2	20	+		0.791985
CTGAGGTAGTAGGTTGTGTGGTAG	24	1.73379	0.492474	0	hsa-let-7b	2	21	+		0.742087
ATGAGGTAGTAGGTTGTGTGGAT	23	0.433447	0	1.61342	hsa-let-7b	2	20	+		0.68229
CTGAGGTAGTAGGTTGTGTGGTTAA	25	0	1.96989	0	hsa-let-7b	2	22	+		0.656631
CTGAGGTAGTAGGTTGTGTGGTTAT	25	0	1.96989	0	hsa-let-7b	2	22	+		0.656631
ATGAGGTAGTAGGTTGTGTG	20	0.866894	0	1.07562	hsa-let-7b	2	17	+		0.647503
GTGAGGTAGTAGGTTGTGTGGTAA	24	0.866894	0.984947	0	hsa-let-7b	2	21	+		0.61728
ATGAGGTAGTAGGTTGTGTGGTTAG	25	1.73379	0	0	hsa-let-7b	2	22	+		0.577929
ATGAGGTAGTAGGTTGTGTGGTTGT	25	1.73379	0	0	hsa-let-7b	2	22	+		0.577929
TTGAGGTAGTAGGTTGTGTGAA	22	0	0.492474	1.07562	hsa-let-7b	2	19	+		0.522696
TTGAGGTAGTAGGTTGTGTGGAA	23	0	0.492474	1.07562	hsa-let-7b	2	20	+		0.522696
GTGAGGTAGTAGGTTGTA	18	0	0.984947	0.537808	hsa-let-7b	2	15	+		0.507585
CTGAGGTAGTAGGTTGTGTGGTTG	24	0	0.984947	0.537808	hsa-let-7b	2	21	+		0.507585
GTGAGGTAGTAGGTTGTGTGG	21	0.433447	0.984947	0	hsa-let-7b	2	18	+		0.472798
TTGAGGTAGTAGGTTGTGTGGTAT	24	0.866894	0	0.537808	hsa-let-7b	2	21	+		0.468234
ATGAGGTAGTAGGTTGTGTGGTTGA	25	0.866894	0	0.537808	hsa-let-7b	2	22	+		0.468234
GTGAGGTAGTAGGTTGTGTGGTTAT	25	0.866894	0.492474	0	hsa-let-7b	2	22	+		0.453122
ATGAGGTAGTAGGTTGTAA	19	1.30034	0	0	hsa-let-7b	2	16	+		0.433447
ATGAGGTAGTAGGTTGTGTGGTGA	24	1.30034	0	0	hsa-let-7b	2	21	+		0.433447
GTGAGGTAGTAGGTTGTAA	19	0	0.492474	0.537808	hsa-let-7b	2	16	+		0.343427
CTGAGGTAGTAGGTTGTGTGGA	22	0	0.492474	0.537808	hsa-let-7b	2	19	+		0.343427
ATGAGGTAGTAGGTTGTGTGAA	22	0	0.984947	0	hsa-let-7b	2	19	+		0.328316
GTGAGGTAGTAGGTTGTGTGGAA	23	0.433447	0.492474	0	hsa-let-7b	2	20	+		0.30864
TTGAGGTAGTAGGTTGTGTGGTA	23	0.433447	0.492474	0	hsa-let-7b	2	20	+		0.30864
CTGAGGTAGTAGGTTGTAT	19	0.866894	0	0	hsa-let-7b	2	16	+		0.288965
TTGAGGTAGTAGGTTGTGTGA	21	0.866894	0	0	hsa-let-7b	2	18	+		0.288965
GTGAGGTAGTAGGTTGTGTGGTAT	24	0.866894	0	0	hsa-let-7b	2	21	+		0.288965
GTGAGGTAGTAGGTTGTGTGGTGA	24	0.866894	0	0	hsa-let-7b	2	21	+		0.288965
GTGAGGTAGTAGGTTGT	17	0	0	0.537808	hsa-let-7b	2	14	+		0.179269
TTGAGGTAGTAGGTTGTG	18	0	0	0.537808	hsa-let-7b	2	15	+		0.179269
ATGAGGTAGTAGGTTGTGT	19	0	0	0.537808	hsa-let-7b	2	16	+		0.179269
GCGAGGTAGTAGGTTGTGTGGT	22	0	0	0.537808	hsa-let-7b	2	19	+		0.179269
GTGAGGTAGTAGGTTGTGTGGTTC	24	0	0	0.537808	hsa-let-7b	2	21	+		0.179269
TTGAGGTAGTAGGTTGTGTGGTTGT	25	0	0	0.537808	hsa-let-7b	2	22	+		0.179269
CTGAGGTAGTAGGTTGT	17	0	0.492474	0	hsa-let-7b	2	14	+		0.164158
CTGAGGTAGTAGGTTGTGTGA	21	0	0.492474	0	hsa-let-7b	2	18	+		0.164158
CTGAGGTAGTAGGTTGTGTGT	21	0	0.492474	0	hsa-let-7b	2	18	+		0.164158
TTGAGGTAGTAGGTTGTGTGTT	22	0	0.492474	0	hsa-let-7b	2	19	+		0.164158
GTGAGGTAGTAGGTTGTGTGGTTG	24	0	0.492474	0	hsa-let-7b	2	21	+		0.164158
GTGAGGTAGTAGGTTGTGTGGTTTG	25	0	0.492474	0	hsa-let-7b	2	22	+		0.164158
TTGAGGTAGTAGGTTGT	17	0.433447	0	0	hsa-let-7b	2	14	+		0.144482
CTGAGGTAGTAGGTTGTA	18	0.433447	0	0	hsa-let-7b	2	15	+		0.144482
GTGAGGTAGTAGGTTGTGTG	20	0.433447	0	0	hsa-let-7b	2	17	+		0.144482
CTGAGGTAGTAGGTTGTGTGGTG	23	0.433447	0	0	hsa-let-7b	2	20	+		0.144482
ATGAGGTAGTAGGTTGTGTGGTAG	24	0.433447	0	0	hsa-let-7b	2	21	+		0.144482
CTGAGGTAGTAGGTTGTGTGGTCA	24	0.433447	0	0	hsa-let-7b	2	21	+		0.144482
CTGAGGTAGTAGGTTGTGTGGTTTT	25	0.433447	0	0	hsa-let-7b	2	22	+		0.144482
GTGAGGTAGTAGGTTGTGTGGTTAA	25	0.433447	0	0	hsa-let-7b	2	22	+		0.144482
TGAGGTAGTAGGTTGTGTGGTT	22	23047.2	39986.4	31496.2	hsa-let-7b	3	20	+		31509.9
TGAGGTAGTAGGTTGTGTGGT	21	7157.51	15348.4	12601.9	hsa-let-7b	3	19	+		11702.6
TGAGGTAGTAGGTTGTGTGGTTT	23	7713.19	14782.6	10495.9	hsa-let-7b	3	21	+		10997.2
TGAGGTAGTAGGTTGTGTGG	20	4237.38	12358.1	9906.41	hsa-let-7b	3	18	+		8833.97
TGAGGTAGTAGGTTGTGTGGTTA	23	5607.94	10709.8	6533.82	hsa-let-7b	3	21	+		7617.19
TGAGGTAGTAGGTTGTGTGGTAA	23	2847.31	5449.71	3740.99	hsa-let-7b	3	21	+		4012.67
TGAGGTAGTAGGTTGTGTGGTA	22	2514.43	4693.27	3788.32	hsa-let-7b	3	20	+		3665.34
TGAGGTAGTAGGTTGTGTGGTAT	23	2320.24	3612.29	2432.5	hsa-let-7b	3	21	+		2788.35
TGAGGTAGTAGGTTGTGTGGTTAT	24	1742.89	2892.79	1678.5	hsa-let-7b	3	22	+		2104.73
TGAGGTAGTAGGTTGTGTGGTTAA	24	1291.67	2133.4	1290.74	hsa-let-7b	3	22	+		1571.94
TGAGGTAGTAGGTTGTGTGGAA	22	674.877	1949.21	1582.23	hsa-let-7b	3	20	+		1402.11
TGAGGTAGTAGGTTGTGTGGTTG	23	883.798	1329.68	1481.66	hsa-let-7b	3	21	+		1231.71
TGAGGTAGTAGGTTGTGTGA	20	548.31	1597.58	1254.17	hsa-let-7b	3	18	+		1133.35
TGAGGTAGTAGGTTGTGTGGA	21	494.129	1484.81	1348.82	hsa-let-7b	3	19	+		1109.25
TGAGGTAGTAGGTTGTGTGGTAG	23	658.839	1320.81	1253.09	hsa-let-7b	3	21	+		1077.58
TGAGGTAGTAGGTTGTGTGGTTTT	24	729.925	1525.68	753.468	hsa-let-7b	3	22	+		1003.03
TGAGGTAGTAGGTTGTGTG	19	295.177	894.824	791.115	hsa-let-7b	3	17	+		660.372
TGAGGTAGTAGGTTGTGTGAA	21	275.672	846.07	716.897	hsa-let-7b	3	19	+		612.88
TGAGGTAGTAGGTTGTGAA	19	260.068	629.874	578.681	hsa-let-7b	3	17	+		489.541
TGAGGTAGTAGGTTGTGTGGTTGT	24	344.59	536.796	485.64	hsa-let-7b	3	22	+		455.676
TGAGGTAGTAGGTTGTGTGGTTAG	24	286.508	566.345	415.725	hsa-let-7b	3	22	+		422.859
TGAGGTAGTAGGTTGTGTAA	20	234.061	487.549	365.709	hsa-let-7b	3	18	+		362.44
TGAGGTAGTAGGTTGTGTGGTTTA	24	279.14	516.112	229.106	hsa-let-7b	3	22	+		341.453
TGAGGTAGTAGGTTGTGTGGTTGA	24	225.392	413.185	317.306	hsa-let-7b	3	22	+		318.628
TGAGGTAGTAGGTTGTGT	18	102.727	375.265	382.919	hsa-let-7b	3	16	+		286.97
TGAGGTAGTAGGTTGTAT	18	193.751	352.119	243.627	hsa-let-7b	3	16	+		263.165
TGAGGTAGTAGGTTGTA	17	122.232	257.564	301.71	hsa-let-7b	3	15	+		227.169
TGAGGTAGTAGGTTGTGA	18	96.6587	283.665	235.022	hsa-let-7b	3	16	+		205.115
TGAGGTAGTAGGTTGTGTGGTGA	23	133.068	243.282	216.199	hsa-let-7b	3	21	+		197.516
TGAGGTAGTAGGTTGTAG	18	67.6177	191.08	171.023	hsa-let-7b	3	16	+		143.24
TGAGGTAGTAGGTTGTGTGGTG	22	96.2252	179.26	148.435	hsa-let-7b	3	20	+		141.307
TGAGGTAGTAGGTTGTAA	18	87.1228	190.587	131.225	hsa-let-7b	3	16	+		136.312
TGAGGTAGTAGGTTGT	16	33.8089	93.57	233.946	hsa-let-7b	3	14	+		120.442
TGAGGTAGTAGGTTGTG	17	45.9454	123.611	157.04	hsa-let-7b	3	15	+		108.865
TGAGGTAGTAGGTTGTGTGT	20	44.2116	154.637	116.166	hsa-let-7b	3	18	+		105.005
TGAGGTAGTAGGTTGTGTGGTTTG	24	52.8805	96.5248	63.9991	hsa-let-7b	3	22	+		71.1348
TGAGGTAGTAGGTTGTGTGGAT	22	45.9454	73.871	67.2259	hsa-let-7b	3	20	+		62.3474
TGAGGTAGTAGGTTGTGTGGTGT	23	43.7781	67.9614	72.0662	hsa-let-7b	3	21	+		61.2686
TGAGGTAGTAGGTTGTGTGGTTC	23	45.0785	57.6194	49.4783	hsa-let-7b	3	21	+		50.7254
TGAGGTAGTAGGTTGTGTGGAG	22	17.3379	54.1721	56.4698	hsa-let-7b	3	20	+		42.6599
TGAGGTAGTAGGTTGTGTA	19	30.3413	52.2022	40.8734	hsa-let-7b	3	17	+		41.139
TGAGGTAGTAGGTTGTGTGGG	21	12.1365	31.0258	32.8063	hsa-let-7b	3	19	+		25.3229
TGAGGTAGTAGGTTGTGTAG	20	14.3037	33.9807	25.277	hsa-let-7b	3	18	+		24.5205
TGAGGTAGTAGGTTGTGTGGTAC	23	14.7372	26.5936	18.8233	hsa-let-7b	3	21	+		20.0513
TGAGGTAGTAGGTTGTGAG	19	9.96928	26.5936	20.4367	hsa-let-7b	3	17	+		18.9998
TGAGGTAGTAGGTTGTGTGGTTAC	24	11.7031	28.071	13.983	hsa-let-7b	3	22	+		17.919
TGAGGTAGTAGGTTGTGTGGTC	22	14.3037	22.6538	15.0586	hsa-let-7b	3	20	+		17.3387
TGAGGTAGTAGGTTGTGTGGTTTC	24	10.8362	21.1764	17.7476	hsa-let-7b	3	22	+		16.5867
TGAGGTAGTAGGTTGTGTGTT	21	12.57	21.6688	10.7562	hsa-let-7b	3	19	+		14.9983
CGAGGTAGTAGGTTGTGTGGTT	22	9.10239	16.7441	16.1342	hsa-let-7b	3	20	+		13.9936
GGAGGTAGTAGGTTGTGTGGTT	22	7.3686	14.7742	17.2098	hsa-let-7b	3	20	+		13.1175
TGAGGTAGTAGGTTGTGTAT	20	7.80204	17.2366	6.45369	hsa-let-7b	3	18	+		10.4974
TGAGGTAGTAGGTTGTGTGAG	21	4.76792	20.1914	5.91588	hsa-let-7b	3	19	+		10.2917
TGAGGTAGTAGGTTGTGTGGTTCA	24	4.33447	7.87958	11.8318	hsa-let-7b	3	22	+		8.01527
TGAGGTAGTAGGTTGTGTGGC	21	6.5017	9.84947	7.52931	hsa-let-7b	3	19	+		7.96016
TGAGGTAGTAGGTTGTGAT	19	1.73379	8.86452	12.9074	hsa-let-7b	3	17	+		7.83523
AGAGGTAGTAGGTTGTGTGGTT	22	6.06826	8.37205	6.9915	hsa-let-7b	3	20	+		7.14394
TGAGGTAGTAGGTTGTGTGGTTCT	24	4.33447	10.3419	6.45369	hsa-let-7b	3	22	+		7.04337
TGAGGTAGTAGGTTGTGTGGGT	22	6.06826	8.37205	5.91588	hsa-let-7b	3	20	+		6.7854
TGAGGTAGTAGGTTGTGTGAT	21	4.76792	9.357	4.30246	hsa-let-7b	3	19	+		6.14246
TGAGGTAGTAGGTTGTGTGTA	21	2.16723	7.3871	8.06711	hsa-let-7b	3	19	+		5.87382
CGAGGTAGTAGGTTGTGTGGT	21	2.60068	7.3871	5.91588	hsa-let-7b	3	19	+		5.30122
TGAGGTAGTAGGTTGTGTGGGA	22	0.866894	7.3871	6.45369	hsa-let-7b	3	20	+		4.90256
TGAGGTAGTAGGTTGTGTTA	20	5.20136	5.90968	3.22685	hsa-let-7b	3	18	+		4.7793
TGAGGTAGTAGGTTGTGGT	19	3.46758	4.92474	5.91588	hsa-let-7b	3	17	+		4.7694
TGAGGTAGTAGGTTGTGTGGTTGG	24	2.16723	8.86452	3.22685	hsa-let-7b	3	22	+		4.75287
GGAGGTAGTAGGTTGTGTGGT	21	0.433447	5.90968	6.45369	hsa-let-7b	3	19	+		4.26561
CGAGGTAGTAGGTTGTGTGGTTA	23	3.46758	4.92474	4.30246	hsa-let-7b	3	21	+		4.23159
TGAGGTAGTAGGTTGTGTGGTCA	23	2.16723	4.92474	5.37808	hsa-let-7b	3	21	+		4.15668
TGAGGTAGTAGGTTGTGG	18	0.866894	6.40216	4.84027	hsa-let-7b	3	16	+		4.03644
TGAGGTAGTAGGTTGTGTT	19	0.433447	6.40216	4.84027	hsa-let-7b	3	17	+		3.89196
CGAGGTAGTAGGTTGTGTGGTTT	23	3.90102	3.44732	4.30246	hsa-let-7b	3	21	+		3.8836
CGAGGTAGTAGGTTGTGTGG	20	1.73379	4.43226	5.37808	hsa-let-7b	3	18	+		3.84804
TGAGGTAGTAGGTTGTGTGGAC	22	2.16723	4.92474	4.30246	hsa-let-7b	3	20	+		3.79814
GGAGGTAGTAGGTTGTGTGGTTT	23	2.60068	5.41721	3.22685	hsa-let-7b	3	21	+		3.74825
GGAGGTAGTAGGTTGTGTGG	20	0.866894	4.43226	5.91588	hsa-let-7b	3	18	+		3.73835
TGAGGTAGTAGGTTGTGTGGCT	22	2.60068	3.93979	4.30246	hsa-let-7b	3	20	+		3.61431
TAAGGTAGTAGGTTGTGTGGTT	22	2.60068	4.92474	3.22685	hsa-let-7b	3	20	+		3.58409
TGAGGTAGTAGGTTGAA	17	1.73379	5.41721	3.22685	hsa-let-7b	3	15	+		3.45928
GGAGGTAGTAGGTTGTGTGGTTA	23	1.30034	4.92474	3.76465	hsa-let-7b	3	21	+		3.32991
TGAGGTAGTAGGTTGA	16	3.90102	3.44732	2.15123	hsa-let-7b	3	14	+		3.16652
TGAGGTAGTAGGTTGTGTGGTCT	23	1.73379	3.93979	3.76465	hsa-let-7b	3	21	+		3.14608
AGAGGTAGTAGGTTGTGTGGTTT	23	3.03413	3.93979	2.15123	hsa-let-7b	3	21	+		3.04172
TGAGGTAGTAGGTTGTGGA	19	1.30034	3.93979	2.68904	hsa-let-7b	3	17	+		2.64306
TGAGGTAGTAGGTTGTGTTT	20	0	3.93979	3.76465	hsa-let-7b	3	18	+		2.56815
TGAGGTAGTAGGTTGTGTGGTTGC	24	0.866894	3.44732	3.22685	hsa-let-7b	3	22	+		2.51368
CGAGGTAGTAGGTTGTGTGGTA	22	1.73379	2.95484	1.61342	hsa-let-7b	3	20	+		2.10068
TGAGGTAGTAGGTTGTGTGGCA	22	0.433447	1.96989	3.76465	hsa-let-7b	3	20	+		2.056
CGAGGTAGTAGGTTGTGTGGTAA	23	0.866894	3.44732	1.61342	hsa-let-7b	3	21	+		1.97588
AGAGGTAGTAGGTTGTGTGGT	21	0.866894	2.95484	1.61342	hsa-let-7b	3	19	+		1.81172
GGAGGTAGTAGGTTGTGTGGTAA	23	1.73379	1.96989	1.07562	hsa-let-7b	3	21	+		1.5931
GGAGGTAGTAGGTTGTGTGGTA	22	0.433447	1.96989	2.15123	hsa-let-7b	3	20	+		1.51819
CGAGGTAGTAGGTTGTGTGGTAT	23	1.73379	0.984947	1.61342	hsa-let-7b	3	21	+		1.44405
TCAGGTAGTAGGTTGTGTGGTT	22	2.16723	0.492474	1.61342	hsa-let-7b	3	20	+		1.42438
TGAGGTAGTAGGTTGTGTGC	20	0	0.984947	3.22685	hsa-let-7b	3	18	+		1.40393
TGAGGTAGTAGGTTGTTT	18	1.73379	2.46237	0	hsa-let-7b	3	16	+		1.39872
AGAGGTAGTAGGTTGCA	17	2.16723	1.47742	0.537808	hsa-let-7b	3	15	+		1.39415
TGAGGTAGTAGGTTGTGTGGTGG	23	0.866894	1.47742	1.61342	hsa-let-7b	3	21	+		1.31925
TAAGGTAGTAGGTTGTGTGGTTT	23	1.30034	1.47742	1.07562	hsa-let-7b	3	21	+		1.28446
TGAGGTAGTAGGTTGTGTGCT	21	0	1.96989	1.61342	hsa-let-7b	3	19	+		1.19444
TGAGGTAGTAGGTTGTGTGAC	21	0.433447	1.96989	1.07562	hsa-let-7b	3	19	+		1.15965
TTAGGTAGTAGGTTGTGTGGTT	22	0.433447	1.96989	1.07562	hsa-let-7b	3	20	+		1.15965
TTAGGTAGTAGGTTGTGTGGTTT	23	0.866894	1.47742	1.07562	hsa-let-7b	3	21	+		1.13998
AGAGGTAGTAGGTTGTGTGGTTA	23	0.866894	1.96989	0.537808	hsa-let-7b	3	21	+		1.12487
TGAGGTAGTAGGTTGTGTGGTCG	23	0.866894	2.46237	0	hsa-let-7b	3	21	+		1.10975
TGAGGTAGTAGGTTGTTA	18	2.16723	0.984947	0	hsa-let-7b	3	16	+		1.05073
TAAGGTAGTAGGTTGTGTGGT	21	0.433447	1.96989	0.537808	hsa-let-7b	3	19	+		0.980383
TGAGGTAGTAGGTTGTGGG	19	1.30034	0	1.61342	hsa-let-7b	3	17	+		0.971254
AGAGGTAGTAGGTTGTGTGGTAT	23	0.866894	1.47742	0.537808	hsa-let-7b	3	21	+		0.960707
TGAGGTAGTAGGTTGTGAC	19	0.433447	0.492474	1.61342	hsa-let-7b	3	17	+		0.846448
AGAGGTAGTAGGTTGTGTGG	20	0.433447	0.984947	1.07562	hsa-let-7b	3	18	+		0.831336
AGAGGTAGTAGGTTGTGTGGTA	22	0.433447	0.984947	1.07562	hsa-let-7b	3	20	+		0.831336
TAAGGTAGTAGGTTGTGTGG	20	0.433447	1.47742	0.537808	hsa-let-7b	3	18	+		0.816225
GGAGGTAGTAGGTTGTGTGGTAT	23	1.30034	0.984947	0	hsa-let-7b	3	21	+		0.761763
TTAGGTAGTAGGTTGTGTGGTA	22	0	0.984947	1.07562	hsa-let-7b	3	20	+		0.686854
CGAGGTAGTAGGTTGTGTGGA	21	0	1.47742	0.537808	hsa-let-7b	3	19	+		0.671743
CGAGGTAGTAGGTTGTGTGGTAG	23	0.433447	0.492474	1.07562	hsa-let-7b	3	21	+		0.667179
GGAGGTAGTAGGTTGTGTGGTTTT	24	0.433447	0.492474	1.07562	hsa-let-7b	3	22	+		0.667179
TAAGGTAGTAGGTTGTGTGGTA	22	0	1.96989	0	hsa-let-7b	3	20	+		0.656631
GGAGGTAGTAGGTTGTA	17	0.433447	0.984947	0.537808	hsa-let-7b	3	15	+		0.652067
AGAGGTAGTAGGTTGTGTGGTAA	23	0.433447	0.984947	0.537808	hsa-let-7b	3	21	+		0.652067
CGAGGTAGTAGGTTGTGTGGTTAA	24	1.73379	0	0	hsa-let-7b	3	22	+		0.577929
TGAGGTAGTAGGTTGTGTGTG	21	0	0.492474	1.07562	hsa-let-7b	3	19	+		0.522696
AGAGGTAGTAGGTTGTGTGGAA	22	0	0.492474	1.07562	hsa-let-7b	3	20	+		0.522696
GGAGGTAGTAGGTTGTGTGGTTG	23	0	0.492474	1.07562	hsa-let-7b	3	21	+		0.522696
GGAGGTAGTAGGTTGTGTGGAA	22	0	0.984947	0.537808	hsa-let-7b	3	20	+		0.507585
TGAGGTAGTAGGTTGTGTTG	20	0.433447	0.492474	0.537808	hsa-let-7b	3	18	+		0.487909
AGAGGTAGTAGGTTGTGTGGTTG	23	0.433447	0.492474	0.537808	hsa-let-7b	3	21	+		0.487909
CGAGGTAGTAGGTTGTGTGGTTAT	24	0.433447	0.492474	0.537808	hsa-let-7b	3	22	+		0.487909
GGAGGTAGTAGGTTGTGTGGTTAT	24	0.433447	0.492474	0.537808	hsa-let-7b	3	22	+		0.487909
CGAGGTAGTAGGTTGTGTGA	20	0.433447	0.984947	0	hsa-let-7b	3	18	+		0.472798
TGAGGTAGTAGGTTGTGTCG	20	0.433447	0.984947	0	hsa-let-7b	3	18	+		0.472798
AGAGGTAGTAGGTTGTGTGGTTAA	24	0.433447	0.984947	0	hsa-let-7b	3	22	+		0.472798
CGAGGTAGTAGGTTGTGTGGTTTT	24	0.433447	0.984947	0	hsa-let-7b	3	22	+		0.472798
TCAGGTAGTAGGTTGTGTGGT	21	0.866894	0	0.537808	hsa-let-7b	3	19	+		0.468234
TGAGGTAGTAGGTTGAG	17	0	0	1.07562	hsa-let-7b	3	15	+		0.358538
TGAGGTAGTAGGTTGGG	17	0	0	1.07562	hsa-let-7b	3	15	+		0.358538
TAAGGTAGTAGGTTGTGTGGTAA	23	0	0	1.07562	hsa-let-7b	3	21	+		0.358538
TCAGGTAGTAGGTTGTGTGGTTAA	24	0	0	1.07562	hsa-let-7b	3	22	+		0.358538
TAAGGTAGTAGGTTGTGTGA	20	0	0.492474	0.537808	hsa-let-7b	3	18	+		0.343427
TGAGGTAGTAGGTTGTGTAC	20	0	0.492474	0.537808	hsa-let-7b	3	18	+		0.343427
TGAGGTAGTAGGTTGTGTTC	20	0	0.492474	0.537808	hsa-let-7b	3	18	+		0.343427
TCAGGTAGTAGGTTGTGTGGTTA	23	0	0.492474	0.537808	hsa-let-7b	3	21	+		0.343427
CGAGGTAGTAGGTTGTGA	18	0	0.984947	0	hsa-let-7b	3	16	+		0.328316
TGAGGTAGTAGGTTGTGCA	19	0	0.984947	0	hsa-let-7b	3	17	+		0.328316
TGAGGTAGTAGGTTGTGTCA	20	0	0.984947	0	hsa-let-7b	3	18	+		0.328316
TTAGGTAGTAGGTTGTGTAA	20	0	0.984947	0	hsa-let-7b	3	18	+		0.328316
TTAGGTAGTAGGTTGTGTGGT	21	0	0.984947	0	hsa-let-7b	3	19	+		0.328316
CGAGGTAGTAGGTTGTGTGGAA	22	0	0.984947	0	hsa-let-7b	3	20	+		0.328316
TCAGGTAGTAGGTTGTGTGGTAG	23	0	0.984947	0	hsa-let-7b	3	21	+		0.328316
TCAGGTAGTAGGTTGTGTGGTTT	23	0	0.984947	0	hsa-let-7b	3	21	+		0.328316
TTAGGTAGTAGGTTGTGTGGTAT	23	0	0.984947	0	hsa-let-7b	3	21	+		0.328316
GGAGGTAGTAGGTTGTGTGGTTAA	24	0	0.984947	0	hsa-let-7b	3	22	+		0.328316
TGAGGTAGTAGGTTGG	16	0.433447	0	0.537808	hsa-let-7b	3	14	+		0.323751
GGAGGTAGTAGGTTGTGTGGTAG	23	0.433447	0	0.537808	hsa-let-7b	3	21	+		0.323751
TAAGGTAGTAGGTTGTGTGGTAT	23	0.433447	0	0.537808	hsa-let-7b	3	21	+		0.323751
TGAGGTAGTAGGTTGTGC	18	0.433447	0.492474	0	hsa-let-7b	3	16	+		0.30864
AGAGGTAGTAGGTTGTGTGGA	21	0.433447	0.492474	0	hsa-let-7b	3	19	+		0.30864
TCAGGTAGTAGGTTGTGTGGTA	22	0.433447	0.492474	0	hsa-let-7b	3	20	+		0.30864
CGAGGTAGTAGGTTGTGTGGTTGA	24	0.433447	0.492474	0	hsa-let-7b	3	22	+		0.30864
TGAGGTAGTAGGTTGTGTGGTTCG	24	0.433447	0.492474	0	hsa-let-7b	3	22	+		0.30864
TGAGGTAGTAGGTTGTT	17	0.866894	0	0	hsa-let-7b	3	15	+		0.288965
CGAGGTAGTAGGTTGTGTGAA	21	0.866894	0	0	hsa-let-7b	3	19	+		0.288965
AGAGGTAGTAGGTTGC	16	0	0	0.537808	hsa-let-7b	3	14	+		0.179269
TGAGGTAGTAGGTTTT	16	0	0	0.537808	hsa-let-7b	3	14	+		0.179269
AGAGGTAGTAGGTTGAA	17	0	0	0.537808	hsa-let-7b	3	15	+		0.179269
GGAGGTAGTAGGTTGTAA	18	0	0	0.537808	hsa-let-7b	3	16	+		0.179269
TGAGGTAGTAGGTTGTTG	18	0	0	0.537808	hsa-let-7b	3	16	+		0.179269
GGAGGTAGTAGGTTGTGTAA	20	0	0	0.537808	hsa-let-7b	3	18	+		0.179269
TTAGGTAGTAGGTTGTGTGG	20	0	0	0.537808	hsa-let-7b	3	18	+		0.179269
GGAGGTAGTAGGTTGTGTGAA	21	0	0	0.537808	hsa-let-7b	3	19	+		0.179269
TAAGGTAGTAGGTTGTGTGGA	21	0	0	0.537808	hsa-let-7b	3	19	+		0.179269
TGAGGTAGTAGGTTGTGTGCA	21	0	0	0.537808	hsa-let-7b	3	19	+		0.179269
CGAGGTAGTAGGTTGTGTGGCA	22	0	0	0.537808	hsa-let-7b	3	20	+		0.179269
GGAGGTAGTAGGTTGTGTGGTG	22	0	0	0.537808	hsa-let-7b	3	20	+		0.179269
TGAGGTAGTAGGTTGTGTGGGG	22	0	0	0.537808	hsa-let-7b	3	20	+		0.179269
AGAGGTAGTAGGTTGTGTGGTAG	23	0	0	0.537808	hsa-let-7b	3	21	+		0.179269
GGAGGTAGTAGGTTGTGTGGTAC	23	0	0	0.537808	hsa-let-7b	3	21	+		0.179269
TTAGGTAGTAGGTTGTGTGGTTA	23	0	0	0.537808	hsa-let-7b	3	21	+		0.179269
GGAGGTAGTAGGTTGTGTGGTTAG	24	0	0	0.537808	hsa-let-7b	3	22	+		0.179269
TAAGGTAGTAGGTTGTGTGGTTAT	24	0	0	0.537808	hsa-let-7b	3	22	+		0.179269
TAAGGTAGTAGGTTGTGTGGTTGA	24	0	0	0.537808	hsa-let-7b	3	22	+		0.179269
TGAGGTAGTAGGTTTA	16	0	0.492474	0	hsa-let-7b	3	14	+		0.164158
CGAGGTAGTAGGTTGTGT	18	0	0.492474	0	hsa-let-7b	3	16	+		0.164158
GGAGGTAGTAGGTTGTGT	18	0	0.492474	0	hsa-let-7b	3	16	+		0.164158
CGAGGTAGTAGGTTGTGTG	19	0	0.492474	0	hsa-let-7b	3	17	+		0.164158
GGAGGTAGTAGGTTGTGTG	19	0	0.492474	0	hsa-let-7b	3	17	+		0.164158
TAAGGTAGTAGGTTGTGAA	19	0	0.492474	0	hsa-let-7b	3	17	+		0.164158
TGAGGTAGTAGGTTGTGCG	19	0	0.492474	0	hsa-let-7b	3	17	+		0.164158
TGAGGTAGTAGGTTGTGTC	19	0	0.492474	0	hsa-let-7b	3	17	+		0.164158
TTAGGTAGTAGGTTGTGTGA	20	0	0.492474	0	hsa-let-7b	3	18	+		0.164158
AGAGGTAGTAGGTTGTGTGAA	21	0	0.492474	0	hsa-let-7b	3	19	+		0.164158
GGAGGTAGTAGGTTGTGTGGA	21	0	0.492474	0	hsa-let-7b	3	19	+		0.164158
TAAGGTAGTAGGTTGTGTGAA	21	0	0.492474	0	hsa-let-7b	3	19	+		0.164158
TAAGGTAGTAGGTTGTGTGGTTA	23	0	0.492474	0	hsa-let-7b	3	21	+		0.164158
TCAGGTAGTAGGTTGTGTGGTAA	23	0	0.492474	0	hsa-let-7b	3	21	+		0.164158
CGAGGTAGTAGGTTGTGTGGTTTA	24	0	0.492474	0	hsa-let-7b	3	22	+		0.164158
TAAGGTAGTAGGTTGTGTGGTTTT	24	0	0.492474	0	hsa-let-7b	3	22	+		0.164158
TTAGGTAGTAGGTTGTGTGGTTAA	24	0	0.492474	0	hsa-let-7b	3	22	+		0.164158
CGAGGTAGTAGGTTGTAA	18	0.433447	0	0	hsa-let-7b	3	16	+		0.144482
TAAGGTAGTAGGTTGTAT	18	0.433447	0	0	hsa-let-7b	3	16	+		0.144482
TGAGGTAGTAGGTTGTCT	18	0.433447	0	0	hsa-let-7b	3	16	+		0.144482
GGAGGTAGTAGGTTGTGAA	19	0.433447	0	0	hsa-let-7b	3	17	+		0.144482
AGAGGTAGTAGGTTGTGTGA	20	0.433447	0	0	hsa-let-7b	3	18	+		0.144482
GGAGGTAGTAGGTTGTGTGT	20	0.433447	0	0	hsa-let-7b	3	18	+		0.144482
AGAGGTAGTAGGTTGTGTGGG	21	0.433447	0	0	hsa-let-7b	3	19	+		0.144482
TAAGGTAGTAGGTTGTGTGGAA	22	0.433447	0	0	hsa-let-7b	3	20	+		0.144482
TAAGGTAGTAGGTTGTGTGGTC	22	0.433447	0	0	hsa-let-7b	3	20	+		0.144482
CGAGGTAGTAGGTTGTGTGGTTG	23	0.433447	0	0	hsa-let-7b	3	21	+		0.144482
TCAGGTAGTAGGTTGTGTGGTGA	23	0.433447	0	0	hsa-let-7b	3	21	+		0.144482
TTAGGTAGTAGGTTGTGTGGTAA	23	0.433447	0	0	hsa-let-7b	3	21	+		0.144482
AGAGGTAGTAGGTTGTGTGGTTGA	24	0.433447	0	0	hsa-let-7b	3	22	+		0.144482
AGAGGTAGTAGGTTGTGTGGTTTA	24	0.433447	0	0	hsa-let-7b	3	22	+		0.144482
AGAGGTAGTAGGTTGTGTGGTTTT	24	0.433447	0	0	hsa-let-7b	3	22	+		0.144482
CGAGGTAGTAGGTTGTGTGGTTGT	24	0.433447	0	0	hsa-let-7b	3	22	+		0.144482
TAAGGTAGTAGGTTGTGTGGTTAA	24	0.433447	0	0	hsa-let-7b	3	22	+		0.144482
TTAGGTAGTAGGTTGTGTGGTTAG	24	0.433447	0	0	hsa-let-7b	3	22	+		0.144482
GAGGTAGTAGGTTGTGTGGTT	21	293.877	552.555	431.322	hsa-let-7b	4	20	+		425.918
GAGGTAGTAGGTTGTGTGGTTT	22	102.293	211.764	160.804	hsa-let-7b	4	21	+		158.287
GAGGTAGTAGGTTGTGTGGT	20	75.8532	214.718	163.493	hsa-let-7b	4	19	+		151.355
GAGGTAGTAGGTTGTGTGG	19	59.3822	165.964	132.301	hsa-let-7b	4	18	+		119.215
GAGGTAGTAGGTTGTGTGGTTA	22	74.9863	163.501	104.335	hsa-let-7b	4	21	+		114.274
GAGGTAGTAGGTTGTGTGGTA	21	31.2082	77.3184	53.2429	hsa-let-7b	4	20	+		53.9232
GAGGTAGTAGGTTGTGTGGTAA	22	32.5085	79.2882	41.949	hsa-let-7b	4	21	+		51.2486
GAGGTAGTAGGTTGTGTGGTAT	22	28.174	59.5893	39.2599	hsa-let-7b	4	21	+		42.3411
GAGGTAGTAGGTTGTGTGGTTAT	23	27.3072	39.8904	28.5038	hsa-let-7b	4	22	+		31.9004
GAGGTAGTAGGTTGTGTGGTTAA	23	14.3037	34.9656	14.5208	hsa-let-7b	4	22	+		21.2634
GAGGTAGTAGGTTGTGTGGAA	21	5.63481	30.5334	22.5879	hsa-let-7b	4	20	+		19.5854
GAGGTAGTAGGTTGTGTGGTAG	22	13.4369	23.6387	19.8989	hsa-let-7b	4	21	+		18.9915
GAGGTAGTAGGTTGTGTGGTTG	22	8.23549	18.714	24.7391	hsa-let-7b	4	21	+		17.2295
GAGGTAGTAGGTTGTGTGGA	20	6.5017	21.6688	15.5964	hsa-let-7b	4	19	+		14.589
GAGGTAGTAGGTTGTGTGA	19	9.10239	15.2667	12.9074	hsa-let-7b	4	18	+		12.4255
GAGGTAGTAGGTTGTGTGGTTTT	23	8.66894	15.7592	6.45369	hsa-let-7b	4	22	+		10.2939
GAGGTAGTAGGTTGTGTGAA	20	3.46758	8.37205	10.2183	hsa-let-7b	4	19	+		7.35266
GAGGTAGTAGGTTGTGTGGTTAG	23	1.30034	11.3269	8.60492	hsa-let-7b	4	22	+		7.07738
GAGGTAGTAGGTTGTGTGGTTGT	23	6.5017	6.40216	6.9915	hsa-let-7b	4	22	+		6.63179
GAGGTAGTAGGTTGTGTAA	19	6.06826	7.87958	5.37808	hsa-let-7b	4	18	+		6.44197
GAGGTAGTAGGTTGTGTGGTTTA	23	5.20136	7.3871	5.37808	hsa-let-7b	4	22	+		5.98885
GAGGTAGTAGGTTGTGAA	18	1.73379	6.40216	9.14273	hsa-let-7b	4	17	+		5.75956
GAGGTAGTAGGTTGTGTGGTTGA	23	2.16723	3.93979	10.7562	hsa-let-7b	4	22	+		5.62106
GAGGTAGTAGGTTGTGTG	18	1.73379	7.87958	6.45369	hsa-let-7b	4	17	+		5.35569
GAGGTAGTAGGTTGTGTGGTGA	22	2.60068	7.3871	3.76465	hsa-let-7b	4	21	+		4.58415
GAGGTAGTAGGTTGTAT	17	1.30034	4.43226	3.76465	hsa-let-7b	4	16	+		3.16575
GAGGTAGTAGGTTGTA	16	1.73379	3.93979	1.07562	hsa-let-7b	4	15	+		2.24973
GAGGTAGTAGGTTGTGT	17	1.30034	2.95484	1.61342	hsa-let-7b	4	16	+		1.9562
GAGGTAGTAGGTTGTGA	17	0	3.44732	2.15123	hsa-let-7b	4	16	+		1.86618
GAGGTAGTAGGTTGTGTGGTG	21	0	3.93979	1.61342	hsa-let-7b	4	20	+		1.85107
GAGGTAGTAGGTTGTGTGT	19	0.433447	3.93979	1.07562	hsa-let-7b	4	18	+		1.81628
GAGGTAGTAGGTTGTAA	17	0	1.47742	2.15123	hsa-let-7b	4	16	+		1.20955
GTGGTAGTAGGTTGTGTGGTT	21	0.866894	0.984947	1.61342	hsa-let-7b	4	20	+		1.15509
GAGGTAGTAGGTTGTGTGGAT	21	0	1.47742	1.61342	hsa-let-7b	4	20	+		1.03028
GAGGTAGTAGGTTGTGTGGTGT	22	0	1.96989	1.07562	hsa-let-7b	4	21	+		1.01517
GAGGTAGTAGGTTGTGTAG	19	0	0.492474	2.15123	hsa-let-7b	4	18	+		0.881235
TAGGTAGTAGGTTGTGTGGTT	21	0	1.47742	1.07562	hsa-let-7b	4	20	+		0.851012
GAGGTAGTAGGTTGTGTGGG	20	0.866894	0.492474	1.07562	hsa-let-7b	4	19	+		0.811661
TGGGTAGTAGGTTGTGTGGTT	21	0	0	2.15123	hsa-let-7b	4	20	+		0.717077
TAGGTAGTAGGTTGTGTGGTTAT	23	0	0	2.15123	hsa-let-7b	4	22	+		0.717077
GCGGTAGTAGGTTGTGTGGTT	21	0	0.984947	1.07562	hsa-let-7b	4	20	+		0.686854
GAGGTAGTAGGTTGTGTGGTAC	22	0	0.984947	1.07562	hsa-let-7b	4	21	+		0.686854
GCGGTAGTAGGTTGTGTGGTTT	22	0.433447	0.984947	0.537808	hsa-let-7b	4	21	+		0.652067
GAGGTAGTAGGTTGTGTGGTTTC	23	0	0	1.61342	hsa-let-7b	4	22	+		0.537808
GAGGTAGTAGGTTGTG	16	0	0.984947	0.537808	hsa-let-7b	4	15	+		0.507585
TAGGTAGTAGGTTGTGTGGTTT	22	0	1.47742	0	hsa-let-7b	4	21	+		0.492474
GAGGTAGTAGGTTGTGTGGTTTG	23	0	1.47742	0	hsa-let-7b	4	22	+		0.492474
GAGGTAGTAGGTTGTAG	17	0.433447	0.492474	0.537808	hsa-let-7b	4	16	+		0.487909
GAGGTAGTAGGTTGTGTGGTTC	22	0.433447	0.984947	0	hsa-let-7b	4	21	+		0.472798
GAGGTAGTAGGTTGTGTGGAG	21	0	0.492474	0.537808	hsa-let-7b	4	20	+		0.343427
GAGGTAGTAGGTTGTGTGGGA	21	0	0.492474	0.537808	hsa-let-7b	4	20	+		0.343427
GGGGTAGTAGGTTGTGTGGTTT	22	0	0.492474	0.537808	hsa-let-7b	4	21	+		0.343427
GGGGTAGTAGGTTGTGTGG	19	0	0.984947	0	hsa-let-7b	4	18	+		0.328316
GTGGTAGTAGGTTGTGTGGT	20	0.433447	0.492474	0	hsa-let-7b	4	19	+		0.30864
GTGGTAGTAGGTTGTGTGG	19	0	0	0.537808	hsa-let-7b	4	18	+		0.179269
GAGGTAGTAGGTTGTGTGGC	20	0	0	0.537808	hsa-let-7b	4	19	+		0.179269
GCGGTAGTAGGTTGTGTGGA	20	0	0	0.537808	hsa-let-7b	4	19	+		0.179269
GAGGTAGTAGGTTGTGTGGCT	21	0	0	0.537808	hsa-let-7b	4	20	+		0.179269
CAGGTAGTAGGTTGTGTGGTTT	22	0	0	0.537808	hsa-let-7b	4	21	+		0.179269
GGGGTAGTAGGTTGTGTGGTAA	22	0	0	0.537808	hsa-let-7b	4	21	+		0.179269
TGGGTAGTAGGTTGTGTGGTTT	22	0	0	0.537808	hsa-let-7b	4	21	+		0.179269
GAGGTAGTAGGTTGTGAG	18	0	0.492474	0	hsa-let-7b	4	17	+		0.164158
GTGGTAGTAGGTTGTGTGAA	20	0	0.492474	0	hsa-let-7b	4	19	+		0.164158
GAGGTAGTAGGTTGTGTGGGG	21	0	0.492474	0	hsa-let-7b	4	20	+		0.164158
GAGGTAGTAGGTTGTGTGGTCA	22	0	0.492474	0	hsa-let-7b	4	21	+		0.164158
GGGGTAGTAGGTTGTGTGGTAT	22	0	0.492474	0	hsa-let-7b	4	21	+		0.164158
GTGGTAGTAGGTTGTGTGGTAA	22	0	0.492474	0	hsa-let-7b	4	21	+		0.164158
TGGGTAGTAGGTTGTGTGGTTA	22	0	0.492474	0	hsa-let-7b	4	21	+		0.164158
GCGGTAGTAGGTTGTGTGGTTTT	23	0	0.492474	0	hsa-let-7b	4	22	+		0.164158
GAGGTAGTAGGTTGTGAT	18	0.433447	0	0	hsa-let-7b	4	17	+		0.144482
GAGGTAGTAGGTTGTGTGAT	20	0.433447	0	0	hsa-let-7b	4	19	+		0.144482
GGGGTAGTAGGTTGTGTGGT	20	0.433447	0	0	hsa-let-7b	4	19	+		0.144482
GAGGTAGTAGGTTGTGTGGGT	21	0.433447	0	0	hsa-let-7b	4	20	+		0.144482
TAGGTAGTAGGTTGTGTGGTA	21	0.433447	0	0	hsa-let-7b	4	20	+		0.144482
GTGGTAGTAGGTTGTGTGGTTAT	23	0.433447	0	0	hsa-let-7b	4	22	+		0.144482
AGGTAGTAGGTTGTGTGGTT	20	62.4164	108.837	98.9566	hsa-let-7b	5	20	+		90.0699
AGGTAGTAGGTTGTGTGGTTT	21	22.1058	44.8151	34.9575	hsa-let-7b	5	21	+		33.9595
AGGTAGTAGGTTGTGTGGT	19	19.5051	36.9355	37.6465	hsa-let-7b	5	19	+		31.3624
AGGTAGTAGGTTGTGTGG	18	7.80204	29.0559	30.655	hsa-let-7b	5	18	+		22.5043
AGGTAGTAGGTTGTGTGGTTA	21	16.471	33.9807	13.983	hsa-let-7b	5	21	+		21.4782
AGGTAGTAGGTTGTGTGGTAA	21	10.8362	17.2366	16.1342	hsa-let-7b	5	21	+		14.7357
AGGTAGTAGGTTGTGTGGTA	20	12.57	9.84947	9.14273	hsa-let-7b	5	20	+		10.5207
AGGTAGTAGGTTGTGTGGTAT	21	9.10239	13.2968	7.52931	hsa-let-7b	5	21	+		9.97616
AGGTAGTAGGTTGTGTGGTTAT	22	0.866894	10.3419	8.06711	hsa-let-7b	5	22	+		6.42532
AGGTAGTAGGTTGTGTGGA	19	3.46758	7.3871	6.9915	hsa-let-7b	5	19	+		5.94873
AGGTAGTAGGTTGTGTGGAA	20	4.33447	7.87958	3.76465	hsa-let-7b	5	20	+		5.32623
AGGTAGTAGGTTGTGTGGTTAA	22	3.03413	6.40216	6.45369	hsa-let-7b	5	22	+		5.29666
AGGTAGTAGGTTGTGTGGTTG	21	3.46758	4.92474	5.37808	hsa-let-7b	5	21	+		4.59013
AGGTAGTAGGTTGTGTGGTAG	21	1.73379	3.44732	6.9915	hsa-let-7b	5	21	+		4.05753
AGGTAGTAGGTTGTGTGAA	19	2.16723	2.95484	4.84027	hsa-let-7b	5	19	+		3.32078
AGGTAGTAGGTTGTGTGGTTTT	22	3.46758	3.44732	1.07562	hsa-let-7b	5	22	+		2.6635
AGGTAGTAGGTTGTGTGA	18	2.16723	2.95484	2.68904	hsa-let-7b	5	18	+		2.6037
AGGTAGTAGGTTGTGTAA	18	2.16723	1.96989	2.15123	hsa-let-7b	5	18	+		2.09612
AGGTAGTAGGTTGTGTGGTTAG	22	2.60068	0.984947	2.68904	hsa-let-7b	5	22	+		2.09156
AGGTAGTAGGTTGTGTGGTTGA	22	0.866894	1.96989	1.07562	hsa-let-7b	5	22	+		1.30413
AGGTAGTAGGTTGTGTGGTTTA	22	0.866894	1.96989	1.07562	hsa-let-7b	5	22	+		1.30413
AGGTAGTAGGTTGTGTG	17	0.433447	1.47742	1.61342	hsa-let-7b	5	17	+		1.17476
AGGTAGTAGGTTGTGAA	17	2.16723	0.492474	0.537808	hsa-let-7b	5	17	+		1.06584
AGGTAGTAGGTTGTGTGT	18	1.30034	0	0.537808	hsa-let-7b	5	18	+		0.612716
AGGTAGTAGGTTGTGTGGTGA	21	0	0.984947	0.537808	hsa-let-7b	5	21	+		0.507585
AGGTAGTAGGTTGTGTGGTTGT	22	0.866894	0	0.537808	hsa-let-7b	5	22	+		0.468234
AGGTAGTAGGTTGTAA	16	0	0	1.07562	hsa-let-7b	5	16	+		0.358538
AGGTAGTAGGTTGTGA	16	0	0	1.07562	hsa-let-7b	5	16	+		0.358538
AGGTAGTAGGTTGTAT	16	0	0.492474	0.537808	hsa-let-7b	5	16	+		0.343427
TGGTAGTAGGTTGTGTGGT	19	0	0.492474	0.537808	hsa-let-7b	5	19	+		0.343427
AGGTAGTAGGTTGTGT	16	0.433447	0.492474	0	hsa-let-7b	5	16	+		0.30864
AGGTAGTAGGTTGTGTGGTTTG	22	0.866894	0	0	hsa-let-7b	5	22	+		0.288965
AGGTAGTAGGTTGTGTGGG	19	0	0	0.537808	hsa-let-7b	5	19	+		0.179269
AGGTAGTAGGTTGTGTGTT	19	0	0	0.537808	hsa-let-7b	5	19	+		0.179269
AGGTAGTAGGTTGTGTGGTG	20	0	0	0.537808	hsa-let-7b	5	20	+		0.179269
CGGTAGTAGGTTGTGTGGAA	20	0	0	0.537808	hsa-let-7b	5	20	+		0.179269
GGGTAGTAGGTTGTGTGGTT	20	0	0	0.537808	hsa-let-7b	5	20	+		0.179269
TGGTAGTAGGTTGTGTGGCA	20	0	0	0.537808	hsa-let-7b	5	20	+		0.179269
AGGTAGTAGGTTGTGTGGTGT	21	0	0	0.537808	hsa-let-7b	5	21	+		0.179269
AGGTAGTAGGTTGTAC	16	0	0.492474	0	hsa-let-7b	5	16	+		0.164158
AGGTAGTAGGTTGTGTA	17	0	0.492474	0	hsa-let-7b	5	17	+		0.164158
AGGTAGTAGGTTGTGTAT	18	0	0.492474	0	hsa-let-7b	5	18	+		0.164158
AGGTAGTAGGTTGTGTGGCT	20	0	0.492474	0	hsa-let-7b	5	20	+		0.164158
AGGTAGTAGGTTGTGTGGTC	20	0	0.492474	0	hsa-let-7b	5	20	+		0.164158
TGGTAGTAGGTTGTGTGGTT	20	0	0.492474	0	hsa-let-7b	5	20	+		0.164158
AGGTAGTAGGTTGTGTGGTAC	21	0	0.492474	0	hsa-let-7b	5	21	+		0.164158
TGGTAGTAGGTTGTGTGGTAA	21	0	0.492474	0	hsa-let-7b	5	21	+		0.164158
TGGTAGTAGGTTGTGTGGTAT	21	0	0.492474	0	hsa-let-7b	5	21	+		0.164158
TGGTAGTAGGTTGTGTGGTTA	21	0	0.492474	0	hsa-let-7b	5	21	+		0.164158
AGGTAGTAGGTTGTAG	16	0.433447	0	0	hsa-let-7b	5	16	+		0.144482
TGGTAGTAGGTTGTGTGG	18	0.433447	0	0	hsa-let-7b	5	18	+		0.144482
AGGTAGTAGGTTGTGTGGAG	20	0.433447	0	0	hsa-let-7b	5	20	+		0.144482
GGGTAGTAGGTTGTGTGGTTA	21	0.433447	0	0	hsa-let-7b	5	21	+		0.144482
GGTAGTAGGTTGTGTGGTT	19	4.33447	11.8194	10.7562	hsa-let-7b	6	20	+		8.97
GGTAGTAGGTTGTGTGGTTT	20	1.73379	3.44732	5.37808	hsa-let-7b	6	21	+		3.51973
GGTAGTAGGTTGTGTGG	17	0.433447	1.47742	3.76465	hsa-let-7b	6	18	+		1.89184
GGTAGTAGGTTGTGTGGTTA	20	0.866894	2.95484	1.61342	hsa-let-7b	6	21	+		1.81172
GGTAGTAGGTTGTGTGGT	18	0.433447	0.984947	2.68904	hsa-let-7b	6	19	+		1.36914
GGTAGTAGGTTGTGTGGTAA	20	0.433447	2.46237	0.537808	hsa-let-7b	6	21	+		1.14454
GGTAGTAGGTTGTGTGGTTAT	21	0	0.984947	1.61342	hsa-let-7b	6	22	+		0.866123
GGTAGTAGGTTGTGTGGTA	19	0.866894	0.492474	1.07562	hsa-let-7b	6	20	+		0.811661
AGTAGTAGGTTGTGTGAA	18	0	0.492474	1.61342	hsa-let-7b	6	19	+		0.701965
GGTAGTAGGTTGTGTGGTTGA	21	0.433447	1.47742	0	hsa-let-7b	6	22	+		0.636956
TGTAGTAGGTTGTGTGGTT	19	0.866894	0.984947	0	hsa-let-7b	6	20	+		0.61728
GGTAGTAGGTTGTGTGGTTAA	21	1.30034	0.492474	0	hsa-let-7b	6	22	+		0.597605
GGTAGTAGGTTGTGTGA	17	0	0.984947	0.537808	hsa-let-7b	6	18	+		0.507585
GGTAGTAGGTTGTGTG	16	0	0.984947	0	hsa-let-7b	6	17	+		0.328316
GGTAGTAGGTTGTGTGGA	18	0	0.984947	0	hsa-let-7b	6	19	+		0.328316
GGTAGTAGGTTGTGTGGTAT	20	0.433447	0.492474	0	hsa-let-7b	6	21	+		0.30864
GGTAGTAGGTTGTGAA	16	0	0	0.537808	hsa-let-7b	6	17	+		0.179269
GGTAGTAGGTTGTGTTA	17	0	0	0.537808	hsa-let-7b	6	18	+		0.179269
GGTAGTAGGTTGTGTGGTAG	20	0	0.492474	0	hsa-let-7b	6	21	+		0.164158
GGTAGTAGGTTGTGTGGTTAC	21	0	0.492474	0	hsa-let-7b	6	22	+		0.164158
TGTAGTAGGTTGTGTGGT	18	0.433447	0	0	hsa-let-7b	6	19	+		0.144482
GGTAGTAGGTTGTGTGGTTC	20	0.433447	0	0	hsa-let-7b	6	21	+		0.144482
GGTAGTAGGTTGTGTGGTTGT	21	0.433447	0	0	hsa-let-7b	6	22	+		0.144482
GTAGTAGGTTGTGTGGTT	18	1.73379	9.84947	6.45369	hsa-let-7b	7	20	+		6.01232
GTAGTAGGTTGTGTGGTTT	19	0.866894	2.46237	4.30246	hsa-let-7b	7	21	+		2.54391
GTAGTAGGTTGTGTGGTTA	19	0	3.44732	1.61342	hsa-let-7b	7	21	+		1.68691
GTAGTAGGTTGTGTGGT	17	1.73379	0.984947	2.15123	hsa-let-7b	7	19	+		1.62332
GTAGTAGGTTGTGTGGTAA	19	2.16723	0.492474	0.537808	hsa-let-7b	7	21	+		1.06584
GTAGTAGGTTGTGTGG	16	0	0.984947	2.15123	hsa-let-7b	7	18	+		1.04539
GTAGTAGGTTGTGTGGTAT	19	0.866894	0	2.15123	hsa-let-7b	7	21	+		1.00604
GTAGTAGGTTGTGTGGTTAT	20	0.866894	0.984947	1.07562	hsa-let-7b	7	22	+		0.975819
GTAGTAGGTTGTGTGGTAG	19	0	0	1.07562	hsa-let-7b	7	21	+		0.358538
GTAGTAGGTTGTGTGGTTGA	20	0	0	1.07562	hsa-let-7b	7	22	+		0.358538
GTAGTAGGTTGTGTGGTA	18	0	0.492474	0.537808	hsa-let-7b	7	20	+		0.343427
GTAGTAGGTTGTGTGGTTTA	20	0	0.984947	0	hsa-let-7b	7	22	+		0.328316
GTAGTAGGTTGTGTGGTTTT	20	0	0.984947	0	hsa-let-7b	7	22	+		0.328316
GTAGTAGGTTGTGTGGA	17	0	0	0.537808	hsa-let-7b	7	19	+		0.179269
GTAGTAGGTTGTGTGGAA	18	0	0	0.537808	hsa-let-7b	7	20	+		0.179269
GTAGTAGGTTGTGTAA	16	0	0.492474	0	hsa-let-7b	7	18	+		0.164158
ATAGTAGGTTGTGTGGTT	18	0.433447	0	0	hsa-let-7b	7	20	+		0.144482
TGAGTAGGTTGTGTGGAA	18	0.433447	0	0	hsa-let-7b	7	20	+		0.144482
ATAGTAGGTTGTGTGGTTA	19	0.433447	0	0	hsa-let-7b	7	21	+		0.144482
GTAGTAGGTTGTGTGGTTG	19	0.433447	0	0	hsa-let-7b	7	21	+		0.144482
TAGTAGGTTGTGTGGT	16	0	0	5.91588	hsa-let-7b	8	19	+		1.97196
TAGTAGGTTGTGTGGTT	17	0.866894	1.47742	2.15123	hsa-let-7b	8	20	+		1.49851
TAGTAGGTTGTGTGGTTT	18	0.433447	0	1.61342	hsa-let-7b	8	21	+		0.68229
TAGTAGGTTGTGTGGTTA	18	0	0	1.61342	hsa-let-7b	8	21	+		0.537808
TAGTAGGTTGTGTGGTAA	18	0	0	1.07562	hsa-let-7b	8	21	+		0.358538
TAGTAGGTTGTGTGGTTAT	19	0	0.984947	0	hsa-let-7b	8	22	+		0.328316
TAGTAGGTTGTGTGGTAT	18	0.433447	0	0.537808	hsa-let-7b	8	21	+		0.323751
TAGTAGGTTGTGTGGAA	17	0	0	0.537808	hsa-let-7b	8	20	+		0.179269
TAGTAGGTTGTGTGGTA	17	0	0	0.537808	hsa-let-7b	8	20	+		0.179269
TAGTAGGTTGTGTGGTAG	18	0	0	0.537808	hsa-let-7b	8	21	+		0.179269
TAGTAGGTTGTGTGGTTGT	19	0	0	0.537808	hsa-let-7b	8	22	+		0.179269
AAGTAGGTTGTGTGGTT	17	0.433447	0	0	hsa-let-7b	8	20	+		0.144482
AAGTAGGTTGTGTGGTTT	18	0.433447	0	0	hsa-let-7b	8	21	+		0.144482
AGTAGGTTGTGTGGTTT	17	0	0	3.76465	hsa-let-7b	9	21	+		1.25488
AGTAGGTTGTGTGGTT	16	0.866894	0	1.07562	hsa-let-7b	9	20	+		0.647503
AGTAGGTTGTGTGGTTA	17	0.433447	0	1.07562	hsa-let-7b	9	21	+		0.503021
AGTAGGTTGTGTGGTTG	17	0	0	1.07562	hsa-let-7b	9	21	+		0.358538
AGTAGGTTGTGTGGTAT	17	0.866894	0	0	hsa-let-7b	9	21	+		0.288965
AGTAGGTTGTGTGGTTTT	18	0	0.492474	0	hsa-let-7b	9	22	+		0.164158
AGTAGGTTGTGTGGTAA	17	0.433447	0	0	hsa-let-7b	9	21	+		0.144482
GTAGGTTGTGTGGTTA	16	0	2.46237	5.91588	hsa-let-7b	10	21	+		2.79275
GTAGGTTGTGTGGTTAA	17	0	0	3.22685	hsa-let-7b	10	22	+		1.07562
GTAGGTTGTGTGGTTT	16	0.433447	0.984947	1.61342	hsa-let-7b	10	21	+		1.01061
GTAGGTTGTGTGGTAT	16	0	0.492474	0.537808	hsa-let-7b	10	21	+		0.343427
GTAGGTTGTGTGGTTTT	17	0.433447	0	0.537808	hsa-let-7b	10	22	+		0.323751
GTAGGTTGTGTGGTAG	16	0	0	0.537808	hsa-let-7b	10	21	+		0.179269
GTAGGTTGTGTGGTTC	16	0	0	0.537808	hsa-let-7b	10	21	+		0.179269
GTAGGTTGTGTGGTTAT	17	0	0	0.537808	hsa-let-7b	10	22	+		0.179269
GTAGGTTGTGTGGTAA	16	0	0.492474	0	hsa-let-7b	10	21	+		0.164158
TAGGTTGTGTGGTTTT	16	0	0	0.537808	hsa-let-7b	11	22	+		0.179269
TGAGGCAGTAGGTTGTATAGTT	22	121.365	41.3678	36.5709	hsa-let-7b*	1	18	-		66.4346
GTAGTAGGTTGTATAGTT	18	17.7713	35.4581	39.2599	hsa-let-7b*	1	14	-		30.8298
TAGTAGGTTGTATAGTT	17	4.33447	4.92474	12.9074	hsa-let-7b*	1	13	-		7.38886
TGAGGCAGTAGGTTGTATAGTA	22	9.96928	2.46237	2.15123	hsa-let-7b*	1	18	-		4.86096
TGAGGCAGTAGGTTGTATAGAA	22	2.60068	1.96989	4.84027	hsa-let-7b*	1	18	-		3.13695
AGTAGGTTGTATAGTT	16	2.16723	0.984947	3.76465	hsa-let-7b*	1	12	-		2.30561
AACTATACAACCTACTGCCTTCCT	24	2.16723	0	0	hsa-let-7b*	1	20	+		0.722412
CCCTATACAACCTACTGCCTTCCT	24	0	0	1.61342	hsa-let-7b*	1	20	+		0.537808
GTAGTAGGTTGTATAGTA	18	0	0.492474	0.537808	hsa-let-7b*	1	14	-		0.343427
AACTATACAACCTACTGCCTTCC	23	0.866894	0	0	hsa-let-7b*	1	19	+		0.288965
TAGTAGGTTGTATAGAA	17	0	0	0.537808	hsa-let-7b*	1	13	-		0.179269
GGAGTAGGTTGTATAGTT	18	0	0	0.537808	hsa-let-7b*	1	14	-		0.179269
AGGCAGTAGGTTGTATAGTT	20	0	0	0.537808	hsa-let-7b*	1	16	-		0.179269
GCGGCAGTAGGTTGTATAGTT	21	0	0	0.537808	hsa-let-7b*	1	17	-		0.179269
AGTAGGTTGTATAGTA	16	0	0.492474	0	hsa-let-7b*	1	12	-		0.164158
GAGTAGGTTGTATAGTT	17	0	0.492474	0	hsa-let-7b*	1	13	-		0.164158
TAGTAGGTTGTATAGTA	17	0	0.492474	0	hsa-let-7b*	1	13	-		0.164158
GTAGTAGGTTGTATAGAT	18	0	0.492474	0	hsa-let-7b*	1	14	-		0.164158
GAGGCAGTAGGTTGTATAGTT	21	0	0.492474	0	hsa-let-7b*	1	17	-		0.164158
AACTATACAACCTACTGCCTTC	22	0	0.492474	0	hsa-let-7b*	1	18	+		0.164158
AACTATACAACCTACTGCCTTCA	23	0	0.492474	0	hsa-let-7b*	1	19	+		0.164158
AGTAGGTTGTATAGTG	16	0.433447	0	0	hsa-let-7b*	1	12	-		0.144482
CAGTAGGTTGTATAGTT	17	0.433447	0	0	hsa-let-7b*	1	13	-		0.144482
ATAGTAGGTTGTATAGTT	18	0.433447	0	0	hsa-let-7b*	1	14	-		0.144482
TTAGTAGGTTGTATAGTT	18	0.433447	0	0	hsa-let-7b*	1	14	-		0.144482
TGAGGCAGTAGGTTGTATAGCT	22	0.433447	0	0	hsa-let-7b*	1	18	-		0.144482
AACTATACAACCTACTGCCTTCCG	24	0.433447	0	0	hsa-let-7b*	1	20	+		0.144482
TGAGGCAGTAGGTTGTATAGT	21	60.6826	26.5936	23.6635	hsa-let-7b*	2	18	-		36.9799
GTAGTAGGTTGTATAGT	17	7.3686	9.357	8.06711	hsa-let-7b*	2	14	-		8.26424
TGAGGCAGTAGGTTGTATAGA	21	4.76792	0.984947	3.22685	hsa-let-7b*	2	18	-		2.99324
TAGTAGGTTGTATAGT	16	2.60068	1.96989	3.76465	hsa-let-7b*	2	13	-		2.77841
GTAGTAGGTTGTATAGA	17	0.433447	1.96989	0	hsa-let-7b*	2	14	-		0.801114
TGAGGCAGTAGGTTGTATAAA	21	0.866894	0.984947	0.537808	hsa-let-7b*	2	18	-		0.796549
ACTATACAACCTACTGCCTTCCT	23	0.433447	0.984947	0	hsa-let-7b*	2	20	+		0.472798
GCTATACAACCTACTGCCTTCC	22	0	0.492474	0.537808	hsa-let-7b*	2	19	+		0.343427
CCTATACAACCTACTGCCTTCC	22	0	0.984947	0	hsa-let-7b*	2	19	+		0.328316
AGAGGCAGTAGGTTGTATAGT	21	0.433447	0	0.537808	hsa-let-7b*	2	18	-		0.323751
AAAGTAGGTTGTATAGT	17	0.866894	0	0	hsa-let-7b*	2	14	-		0.288965
ATAGTAGGTTGTATAGT	17	0.866894	0	0	hsa-let-7b*	2	14	-		0.288965
CCTATACAACCTACTGCCTTCTT	23	0.866894	0	0	hsa-let-7b*	2	20	+		0.288965
TAGTAGGTTGTATAGA	16	0	0	0.537808	hsa-let-7b*	2	13	-		0.179269
GGAGTAGGTTGTATAGT	17	0	0	0.537808	hsa-let-7b*	2	14	-		0.179269
GTAGTAGGTTGTATAAT	17	0	0.492474	0	hsa-let-7b*	2	14	-		0.164158
TGAGGCAGTAGGTTGTATAGG	21	0	0.492474	0	hsa-let-7b*	2	18	-		0.164158
GGAGGCAGTAGGTTGTATAGA	21	0.433447	0	0	hsa-let-7b*	2	18	-		0.144482
ACTATACAACCTACTGCCTTCC	22	0.433447	0	0	hsa-let-7b*	2	19	+		0.144482
ACTATACAACCTACTGCCTTCCA	23	0.433447	0	0	hsa-let-7b*	2	20	+		0.144482
CTATACAACCTACTGCCTTCC	21	126.566	186.155	202.216	hsa-let-7b*	3	19	+		171.646
CTATACAACCTACTGCCTTCCT	22	134.802	157.099	168.334	hsa-let-7b*	3	20	+		153.412
CTATACAACCTACTGCCTTC	20	25.1399	35.9506	55.3942	hsa-let-7b*	3	18	+		38.8282
CTATACAACCTACTGCCTTCT	21	21.6723	35.4581	34.9575	hsa-let-7b*	3	19	+		30.696
CTATACAACCTACTGCCTTCTT	22	13.4369	23.6387	18.2855	hsa-let-7b*	3	20	+		18.4537
CTATACAACCTACTGCCTTCCA	22	13.0034	14.2817	26.8904	hsa-let-7b*	3	20	+		18.0585
TGAGGCAGTAGGTTGTATAG	20	9.96928	6.40216	2.68904	hsa-let-7b*	3	18	-		6.35349
CTATACAACCTACTGCCTTCCTT	23	2.16723	7.3871	2.68904	hsa-let-7b*	3	21	+		4.08113
CTATACAACCTACTGCCTTCA	21	3.03413	4.43226	4.30246	hsa-let-7b*	3	19	+		3.92295
CTATACAACCTACTGCCTT	19	2.60068	2.95484	3.76465	hsa-let-7b*	3	17	+		3.10673
CTATACAACCTACTGCCTTCCTA	23	2.16723	3.93979	2.68904	hsa-let-7b*	3	21	+		2.93202
TGAGGCAGTAGGTTGTATGG	20	1.73379	2.95484	1.61342	hsa-let-7b*	3	18	-		2.10068
CTATACAACCTACTGCCTTTT	21	0.866894	0.984947	2.68904	hsa-let-7b*	3	19	+		1.51363
CTATACAACCTACTGCCTTCAT	22	0.866894	0	2.68904	hsa-let-7b*	3	20	+		1.18531
GTAGTAGGTTGTATAG	16	0	2.46237	0.537808	hsa-let-7b*	3	14	-		1.00006
CTATACAACCTACTGCCTTCTA	22	0.866894	1.47742	0.537808	hsa-let-7b*	3	20	+		0.960707
CTATACAACCTACTGCCTTCCAA	23	1.30034	0.984947	0.537808	hsa-let-7b*	3	21	+		0.941032
CTATACAACCTACTGCCTTCCAG	23	0.866894	0.492474	1.07562	hsa-let-7b*	3	21	+		0.811661
TGAGGCAGTAGGTTGTATAA	20	1.30034	0.984947	0	hsa-let-7b*	3	18	-		0.761763
CTATACAACCTACTGCCTTTC	21	0	0	1.61342	hsa-let-7b*	3	19	+		0.537808
CTATACAACCTACTGCCTTCCTG	23	0.433447	0.492474	0.537808	hsa-let-7b*	3	21	+		0.487909
TTATACAACCTACTGCCTTCC	21	0.433447	0.984947	0	hsa-let-7b*	3	19	+		0.472798
TTATACAACCTACTGCCTTC	20	0	0	1.07562	hsa-let-7b*	3	18	+		0.358538
CTATACAACCTACTGCCT	18	0	0.492474	0.537808	hsa-let-7b*	3	16	+		0.343427
CTATACAACCTACTGCCTTCCG	22	0	0.492474	0.537808	hsa-let-7b*	3	20	+		0.343427
GTAGTAGGTTGTATGG	16	0.433447	0.492474	0	hsa-let-7b*	3	14	-		0.30864
CTATACAACCTACTGCCTTA	20	0.866894	0	0	hsa-let-7b*	3	18	+		0.288965
CTATACAACCTACTGCC	17	0	0.492474	0	hsa-let-7b*	3	15	+		0.164158
TGAGGCAGTAGGTTGTATGA	20	0	0.492474	0	hsa-let-7b*	3	18	-		0.164158
CTATACAACCTACTGCCTTCCC	22	0	0.492474	0	hsa-let-7b*	3	20	+		0.164158
CTATACAACCTACTGCCTTCCGA	23	0	0.492474	0	hsa-let-7b*	3	21	+		0.164158
GAGGCAGTAGGTTGTATAG	19	0.433447	0	0	hsa-let-7b*	3	17	-		0.144482
CTATACAACCTACTGCCTTCCTC	23	0.433447	0	0	hsa-let-7b*	3	21	+		0.144482
TATACAACCTACTGCCTTCCT	21	7.3686	5.90968	10.2183	hsa-let-7b*	4	20	+		7.83221
TATACAACCTACTGCCTTCC	20	2.60068	3.93979	8.60492	hsa-let-7b*	4	19	+		5.04846
TATACAACCTACTGCCTTCTT	21	2.16723	1.47742	0	hsa-let-7b*	4	20	+		1.21489
TATACAACCTACTGCCTTCCA	21	1.30034	0.492474	1.61342	hsa-let-7b*	4	20	+		1.13541
TGAGGCAGTAGGTTGTATA	19	1.30034	0.492474	1.07562	hsa-let-7b*	4	18	-		0.956143
TGAGGCAGTAGGTTGTAGA	19	0.433447	0.984947	0	hsa-let-7b*	4	18	-		0.472798
TGAGGCAGTAGGTTGTAAA	19	0.433447	0	0.537808	hsa-let-7b*	4	18	-		0.323751
TGAGGCAGTAGGTTGTATG	19	0.866894	0	0	hsa-let-7b*	4	18	-		0.288965
TATACAACCTACTGCCTTC	19	0	0	0.537808	hsa-let-7b*	4	18	+		0.179269
TATACAACCTACTGCCTTCA	20	0	0	0.537808	hsa-let-7b*	4	19	+		0.179269
TATACAACCTACTGCCTTCT	20	0	0	0.537808	hsa-let-7b*	4	19	+		0.179269
TATACAACCTACTGCCTTCCTA	22	0	0	0.537808	hsa-let-7b*	4	21	+		0.179269
TATACAACCTACTGCCTT	18	0	0.492474	0	hsa-let-7b*	4	17	+		0.164158
TATACAACCTACTGCCTTCCTT	22	0	0.492474	0	hsa-let-7b*	4	21	+		0.164158
TGAGGCAGTAGGTTGTAGT	19	0.433447	0	0	hsa-let-7b*	4	18	-		0.144482
TATACAACCTACTGCCTTAA	20	0.433447	0	0	hsa-let-7b*	4	19	+		0.144482
TGAGGCAGTAGGTTGTAT	18	1.30034	0.492474	1.07562	hsa-let-7b*	5	18	-		0.956143
ATACAACCTACTGCCTTCCT	20	0	0.984947	1.61342	hsa-let-7b*	5	20	+		0.866123
ATACAACCTACTGCCTTC	18	0.433447	0.984947	1.07562	hsa-let-7b*	5	18	+		0.831336
TGAGGCAGTAGGTTGTAG	18	0.433447	0.492474	0.537808	hsa-let-7b*	5	18	-		0.487909
TGAGGCAGTAGGTTGTGT	18	0	0.984947	0	hsa-let-7b*	5	18	-		0.328316
ATACAACCTACTGCCTTCT	19	0	0.984947	0	hsa-let-7b*	5	19	+		0.328316
TGAGGCAGTAGGTTGTAA	18	0.866894	0	0	hsa-let-7b*	5	18	-		0.288965
ATACAACCTACTGCCTTCCA	20	0.866894	0	0	hsa-let-7b*	5	20	+		0.288965
ATACAACCTACTGCCTTCC	19	0	0	0.537808	hsa-let-7b*	5	19	+		0.179269
TGAGGCAGTAGGTTGTGA	18	0.433447	0	0	hsa-let-7b*	5	18	-		0.144482
TGAGGCAGTAGGTTGTT	17	0	0	0.537808	hsa-let-7b*	6	18	-		0.179269
TGAGGCAGTAGGTTGTA	17	0.433447	0	0	hsa-let-7b*	6	18	-		0.144482
TGAGGCAGTAGGTTGTG	17	0.433447	0	0	hsa-let-7b*	6	18	-		0.144482
TGAGGCAGTAGGTTGT	16	0	0	0.537808	hsa-let-7b*	7	18	-		0.179269
AATGAGGTAGTAGGTTGTATGGTT	24	17.3379	0	2.68904	hsa-let-7c	1	20	+		6.67564
GTTGAGGTAGTAGGTTGTATGGT	23	1.30034	9.357	3.76465	hsa-let-7c	1	19	+		4.80733
GTTGAGGTAGTAGGTTGTATGG	22	3.46758	3.44732	3.76465	hsa-let-7c	1	18	+		3.55985
GTTGAGGTAGTAGGTTGTATGGTT	24	3.90102	3.93979	1.07562	hsa-let-7c	1	20	+		2.97214
GTTGAGGTAGTAGGTTGTATGGA	23	3.03413	3.44732	0.537808	hsa-let-7c	1	19	+		2.33975
CCTGAGGTAGTAGGTTGTATGGTT	24	0	3.93979	1.07562	hsa-let-7c	1	20	+		1.6718
AATGAGGTAGTAGGTTGTATAG	22	1.73379	0.492474	1.61342	hsa-let-7c	1	18	+		1.27989
ACTGAGGTAGTAGGTTGTATGGTT	24	2.60068	0	1.07562	hsa-let-7c	1	20	+		1.22543
CTTGAGGTAGTAGGTTGTATGGTT	24	1.73379	0	1.07562	hsa-let-7c	1	20	+		0.936468
AATGAGGTAGTAGGTTGTATGGTAA	25	2.60068	0	0	hsa-let-7c	1	21	+		0.866894
ATTGAGGTAGTAGGTTGTATGGTT	24	1.30034	0.984947	0	hsa-let-7c	1	20	+		0.761763
GATGAGGTAGTAGGTTGTATAG	22	2.16723	0	0	hsa-let-7c	1	18	+		0.722412
GCTGAGGTAGTAGGTTGTATGGTT	24	0.433447	0.984947	0.537808	hsa-let-7c	1	20	+		0.652067
AATGAGGTAGTAGGTTGTATGGTA	24	0.866894	0.984947	0	hsa-let-7c	1	20	+		0.61728
CATGAGGTAGTAGGTTGTATGGTT	24	1.30034	0	0.537808	hsa-let-7c	1	20	+		0.612716
AATGAGGTAGTAGGTTGTATGGTTT	25	1.30034	0.492474	0	hsa-let-7c	1	21	+		0.597605
AATGAGGTAGTAGGTTGTATGGTTA	25	1.73379	0	0	hsa-let-7c	1	21	+		0.577929
GTTGAGGTAGTAGGTTGTATG	21	0	1.47742	0	hsa-let-7c	1	17	+		0.492474
GTTGAGGTAGTAGGTTGTATGA	22	0	1.47742	0	hsa-let-7c	1	18	+		0.492474
GTTGAGGTAGTAGGTTGTATGGTA	24	0.433447	0.492474	0.537808	hsa-let-7c	1	20	+		0.487909
GTTGAGGTAGTAGGTTGTA	19	0.866894	0.492474	0	hsa-let-7c	1	15	+		0.453122
AATGAGGTAGTAGGTTGTATA	21	1.30034	0	0	hsa-let-7c	1	17	+		0.433447
TTTGAGGTAGTAGGTTGTATGGT	23	1.30034	0	0	hsa-let-7c	1	19	+		0.433447
TTTGAGGTAGTAGGTTGTATGGTT	24	1.30034	0	0	hsa-let-7c	1	20	+		0.433447
CATGAGGTAGTAGGTTGTATGGTTT	25	1.30034	0	0	hsa-let-7c	1	21	+		0.433447
TATGAGGTAGTAGGTTGTATGGTTG	25	0	0	1.07562	hsa-let-7c	1	21	+		0.358538
CTTGAGGTAGTAGGTTGTATGGT	23	0	0.492474	0.537808	hsa-let-7c	1	19	+		0.343427
CCTGAGGTAGTAGGTTGTATAG	22	0	0.984947	0	hsa-let-7c	1	18	+		0.328316
CCTGAGGTAGTAGGTTGTATGGTTT	25	0	0.984947	0	hsa-let-7c	1	21	+		0.328316
AATGAGGTAGTAGGTTGTATGG	22	0.866894	0	0	hsa-let-7c	1	18	+		0.288965
CTTGAGGTAGTAGGTTGTATAA	22	0.866894	0	0	hsa-let-7c	1	18	+		0.288965
AATGAGGTAGTAGGTTGTATGGT	23	0.866894	0	0	hsa-let-7c	1	19	+		0.288965
TATGAGGTAGTAGGTTGTATGGT	23	0.866894	0	0	hsa-let-7c	1	19	+		0.288965
TATGAGGTAGTAGGTTGTATGGTT	24	0.866894	0	0	hsa-let-7c	1	20	+		0.288965
CATGAGGTAGTAGGTTGTATGGTAA	25	0.866894	0	0	hsa-let-7c	1	21	+		0.288965
CATGAGGTAGTAGGTTGTATGGTAG	25	0.866894	0	0	hsa-let-7c	1	21	+		0.288965
GATGAGGTAGTAGGTTGTATGGTAA	25	0.866894	0	0	hsa-let-7c	1	21	+		0.288965
TTTGAGGTAGTAGGTTGTATGGTTT	25	0.866894	0	0	hsa-let-7c	1	21	+		0.288965
CTTGAGGTAGTAGGTTGTATGGAA	24	0	0	0.537808	hsa-let-7c	1	20	+		0.179269
ATTGAGGTAGTAGGTTGTATGG	22	0	0.492474	0	hsa-let-7c	1	18	+		0.164158
GGTGAGGTAGTAGGTTGTATAG	22	0	0.492474	0	hsa-let-7c	1	18	+		0.164158
GATGAGGTAGTAGGTTGTATGGTT	24	0	0.492474	0	hsa-let-7c	1	20	+		0.164158
CTTGAGGTAGTAGGTTGTATGGTAA	25	0	0.492474	0	hsa-let-7c	1	21	+		0.164158
CTTGAGGTAGTAGGTTGTATGGTTA	25	0	0.492474	0	hsa-let-7c	1	21	+		0.164158
AATGAGGTAGTAGGTT	16	0.433447	0	0	hsa-let-7c	1	12	+		0.144482
TTTGAGGTAGTAGGTTGTCT	20	0.433447	0	0	hsa-let-7c	1	16	+		0.144482
AATGAGGTAGTAGGTTGTATG	21	0.433447	0	0	hsa-let-7c	1	17	+		0.144482
GTTGAGGTAGTAGGTTGTATA	21	0.433447	0	0	hsa-let-7c	1	17	+		0.144482
TTTGAGGTAGTAGGTTGTATA	21	0.433447	0	0	hsa-let-7c	1	17	+		0.144482
AATGAGGTAGTAGGTTGTATAA	22	0.433447	0	0	hsa-let-7c	1	18	+		0.144482
CATGAGGTAGTAGGTTGTATAG	22	0.433447	0	0	hsa-let-7c	1	18	+		0.144482
CTTGAGGTAGTAGGTTGTATAG	22	0.433447	0	0	hsa-let-7c	1	18	+		0.144482
CTTGAGGTAGTAGGTTGTATGG	22	0.433447	0	0	hsa-let-7c	1	18	+		0.144482
TATGAGGTAGTAGGTTGTATAG	22	0.433447	0	0	hsa-let-7c	1	18	+		0.144482
TCTGAGGTAGTAGGTTGTATGGT	23	0.433447	0	0	hsa-let-7c	1	19	+		0.144482
ATTGAGGTAGTAGGTTGTATGGTA	24	0.433447	0	0	hsa-let-7c	1	20	+		0.144482
GGTGAGGTAGTAGGTTGTATGGTTT	25	0.433447	0	0	hsa-let-7c	1	21	+		0.144482
AATGAGGTAGTAGGTTGTATGGTTAA	26	0.433447	0	0	hsa-let-7c	1	22	+		0.144482
AATGAGGTAGTAGGTTGTATGGTTAC	26	0.433447	0	0	hsa-let-7c	1	22	+		0.144482
AATGAGGTAGTAGGTTGTATGGTTAT	26	0.433447	0	0	hsa-let-7c	1	22	+		0.144482
TTGAGGTAGTAGGTTGTATGGTT	23	121.799	231.463	84.4358	hsa-let-7c	2	20	+		145.899
TTGAGGTAGTAGGTTGTATGGT	22	107.928	186.155	97.3432	hsa-let-7c	2	19	+		130.475
ATGAGGTAGTAGGTTGTATGGTT	23	115.297	16.2516	14.5208	hsa-let-7c	2	20	+		48.6898
TTGAGGTAGTAGGTTGTATGG	21	27.3072	68.4538	32.8063	hsa-let-7c	2	18	+		42.8557
TTGAGGTAGTAGGTTGTATGGA	22	13.8703	38.4129	25.277	hsa-let-7c	2	19	+		25.8534
TTGAGGTAGTAGGTTGTATGGTA	23	22.1058	30.5334	15.0586	hsa-let-7c	2	20	+		22.5659
CTGAGGTAGTAGGTTGTATGGTT	23	26.4403	14.7742	5.91588	hsa-let-7c	2	20	+		15.7101
ATGAGGTAGTAGGTTGTATAG	21	31.2082	4.43226	3.76465	hsa-let-7c	2	18	+		13.135
GTGAGGTAGTAGGTTGTATAG	21	11.2696	15.7592	4.84027	hsa-let-7c	2	18	+		10.623
ATGAGGTAGTAGGTTGTATGGT	22	23.4061	5.41721	2.68904	hsa-let-7c	2	19	+		10.5041
TTGAGGTAGTAGGTTGTATGGTTT	24	6.93515	10.8344	4.84027	hsa-let-7c	2	21	+		7.53661
GTGAGGTAGTAGGTTGTATGGTT	23	9.96928	5.41721	4.84027	hsa-let-7c	2	20	+		6.74225
ATGAGGTAGTAGGTTGTATGGTTA	24	14.7372	2.46237	0	hsa-let-7c	2	21	+		5.73319
ATGAGGTAGTAGGTTGTATGGTA	23	13.0034	0	2.15123	hsa-let-7c	2	20	+		5.05155
TTGAGGTAGTAGGTTGTATAG	21	3.46758	5.90968	3.76465	hsa-let-7c	2	18	+		4.38064
TTGAGGTAGTAGGTTGTATGGAA	23	3.90102	5.90968	2.68904	hsa-let-7c	2	20	+		4.16658
TTGAGGTAGTAGGTTGTATGGTTA	24	7.80204	3.44732	0.537808	hsa-let-7c	2	21	+		3.92906
TTGAGGTAGTAGGTTGTATG	20	2.16723	4.92474	3.76465	hsa-let-7c	2	17	+		3.61887
TTGAGGTAGTAGGTTGTATGGTG	23	3.46758	4.92474	0.537808	hsa-let-7c	2	20	+		2.97671
ATGAGGTAGTAGGTTGTATGGTTT	24	8.23549	0.492474	0	hsa-let-7c	2	21	+		2.90932
CTGAGGTAGTAGGTTGTATGGTTA	24	5.20136	0.984947	1.61342	hsa-let-7c	2	21	+		2.59991
TTGAGGTAGTAGGTTGTATGGTAA	24	1.30034	2.95484	3.22685	hsa-let-7c	2	21	+		2.49401
TTGAGGTAGTAGGTTGTATGA	21	0.433447	6.89463	0	hsa-let-7c	2	18	+		2.44269
TTGAGGTAGTAGGTTGTATGAA	22	3.03413	2.46237	1.61342	hsa-let-7c	2	19	+		2.36997
TTGAGGTAGTAGGTTGTATGGTAT	24	3.46758	2.95484	0.537808	hsa-let-7c	2	21	+		2.32007
ATGAGGTAGTAGGTTGTATAA	21	2.60068	1.47742	2.15123	hsa-let-7c	2	18	+		2.07644
ATGAGGTAGTAGGTTGTATGGTAA	24	4.33447	0.984947	0	hsa-let-7c	2	21	+		1.77314
CTGAGGTAGTAGGTTGTATGGT	22	3.46758	0.984947	0.537808	hsa-let-7c	2	19	+		1.66344
ATGAGGTAGTAGGTTGTATGGTAT	24	3.90102	0	1.07562	hsa-let-7c	2	21	+		1.65888
GTGAGGTAGTAGGTTGTATA	20	1.30034	1.47742	2.15123	hsa-let-7c	2	17	+		1.643
ATGAGGTAGTAGGTTGTAAA	20	3.90102	0.984947	0	hsa-let-7c	2	17	+		1.62866
CTGAGGTAGTAGGTTGTATAG	21	1.30034	2.95484	0.537808	hsa-let-7c	2	18	+		1.59766
ATGAGGTAGTAGGTTGTAT	19	4.76792	0	0	hsa-let-7c	2	16	+		1.58931
GTGAGGTAGTAGGTTGTATGGT	22	0.433447	1.47742	2.68904	hsa-let-7c	2	19	+		1.5333
TTGAGGTAGTAGGTTGTAT	19	0.433447	1.96989	2.15123	hsa-let-7c	2	16	+		1.51819
TTGAGGTAGTAGGTTGTATGGTAG	24	2.60068	0.492474	1.07562	hsa-let-7c	2	21	+		1.38959
ATGAGGTAGTAGGTTGTATGGTTG	24	3.90102	0	0	hsa-let-7c	2	21	+		1.30034
TTGAGGTAGTAGGTTGTA	18	0.866894	2.95484	0	hsa-let-7c	2	15	+		1.27391
TTGAGGTAGTAGGTTGTAA	19	0.866894	1.47742	1.07562	hsa-let-7c	2	16	+		1.13998
ATGAGGTAGTAGGTTGTATGG	21	1.73379	1.47742	0	hsa-let-7c	2	18	+		1.0704
TTGAGGTAGTAGGTTGTATGGAT	23	0	2.95484	0	hsa-let-7c	2	20	+		0.984947
CTGAGGTAGTAGGTTGTATGGTTT	24	1.73379	0.492474	0.537808	hsa-let-7c	2	21	+		0.921356
GTGAGGTAGTAGGTTGTATGGTTA	24	2.16723	0	0.537808	hsa-let-7c	2	21	+		0.901681
CTGAGGTAGTAGGTTGTATGG	21	2.16723	0.492474	0	hsa-let-7c	2	18	+		0.886569
GTGAGGTAGTAGGTTGTATAA	21	0.433447	0	2.15123	hsa-let-7c	2	18	+		0.861559
GTGAGGTAGTAGGTTGTAT	19	0	1.96989	0.537808	hsa-let-7c	2	16	+		0.835901
TTGAGGTAGTAGGTTGTATGGTTG	24	0	1.96989	0.537808	hsa-let-7c	2	21	+		0.835901
TTGAGGTAGTAGGTTGTATGGTTGT	25	1.30034	0.984947	0	hsa-let-7c	2	22	+		0.761763
TTGAGGTAGTAGGTTGTAAA	20	0	1.96989	0	hsa-let-7c	2	17	+		0.656631
TTGAGGTAGTAGGTTGTATGT	21	0	1.96989	0	hsa-let-7c	2	18	+		0.656631
TTGAGGTAGTAGGTTGTATGGTGA	24	0.433447	0.984947	0.537808	hsa-let-7c	2	21	+		0.652067
ATGAGGTAGTAGGTTGTATG	20	0.866894	0	1.07562	hsa-let-7c	2	17	+		0.647503
ATGAGGTAGTAGGTTGTATGGTTAA	25	1.73379	0	0	hsa-let-7c	2	22	+		0.577929
GTGAGGTAGTAGGTTGTA	18	0	0.984947	0.537808	hsa-let-7c	2	15	+		0.507585
ATGAGGTAGTAGGTTGTATA	20	0.866894	0.492474	0	hsa-let-7c	2	17	+		0.453122
TTGAGGTAGTAGGTTGTATA	20	0.866894	0.492474	0	hsa-let-7c	2	17	+		0.453122
CTGAGGTAGTAGGTTGTATGGTA	23	0.866894	0.492474	0	hsa-let-7c	2	20	+		0.453122
ATGAGGTAGTAGGTTGTAA	19	1.30034	0	0	hsa-let-7c	2	16	+		0.433447
CTGAGGTAGTAGGTTGTATAA	21	1.30034	0	0	hsa-let-7c	2	18	+		0.433447
TTGAGGTAGTAGGTTGTATAA	21	1.30034	0	0	hsa-let-7c	2	18	+		0.433447
TTGAGGTAGTAGGTTGTATGGG	22	0	0	1.07562	hsa-let-7c	2	19	+		0.358538
GTGAGGTAGTAGGTTGTAA	19	0	0.492474	0.537808	hsa-let-7c	2	16	+		0.343427
TTGAGGTAGTAGGTTGTAGA	20	0	0.492474	0.537808	hsa-let-7c	2	17	+		0.343427
CTGAGGTAGTAGGTTGTATGGA	22	0	0.984947	0	hsa-let-7c	2	19	+		0.328316
GTGAGGTAGTAGGTTGTATGGA	22	0	0.984947	0	hsa-let-7c	2	19	+		0.328316
CTGAGGTAGTAGGTTGTAAA	20	0.433447	0.492474	0	hsa-let-7c	2	17	+		0.30864
TTGAGGTAGTAGGTTGTATGGTTAA	25	0.433447	0.492474	0	hsa-let-7c	2	22	+		0.30864
CTGAGGTAGTAGGTTGTAT	19	0.866894	0	0	hsa-let-7c	2	16	+		0.288965
CTGAGGTAGTAGGTTGTATA	20	0.866894	0	0	hsa-let-7c	2	17	+		0.288965
ATGAGGTAGTAGGTTGTATGGAA	23	0.866894	0	0	hsa-let-7c	2	20	+		0.288965
CCGAGGTAGTAGGTTGTATGGTT	23	0.866894	0	0	hsa-let-7c	2	20	+		0.288965
TTGAGGTAGTAGGTTGTATGGAG	23	0.866894	0	0	hsa-let-7c	2	20	+		0.288965
ATGAGGTAGTAGGTTGTATGGTAG	24	0.866894	0	0	hsa-let-7c	2	21	+		0.288965
CTGAGGTAGTAGGTTGTATGGTAG	24	0.866894	0	0	hsa-let-7c	2	21	+		0.288965
CTGAGGTAGTAGGTTGTATGGTTG	24	0.866894	0	0	hsa-let-7c	2	21	+		0.288965
TTGAGGTAGTAGGTTGTATGGTAC	24	0.866894	0	0	hsa-let-7c	2	21	+		0.288965
GTGAGGTAGTAGGTTGT	17	0	0	0.537808	hsa-let-7c	2	14	+		0.179269
TTGAGGTAGTAGGTTGTG	18	0	0	0.537808	hsa-let-7c	2	15	+		0.179269
ATGAGGTAGTAGGTTGTGT	19	0	0	0.537808	hsa-let-7c	2	16	+		0.179269
CTGAGGTAGTAGGTTGTAGA	20	0	0	0.537808	hsa-let-7c	2	17	+		0.179269
ATGAGGTAGTAGGTTGTATGA	21	0	0	0.537808	hsa-let-7c	2	18	+		0.179269
TTGAGGTAGTAGGTTGTATGTA	22	0	0	0.537808	hsa-let-7c	2	19	+		0.179269
GTGAGGTAGTAGGTTGTATGGTAT	24	0	0	0.537808	hsa-let-7c	2	21	+		0.179269
CTGAGGTAGTAGGTTGT	17	0	0.492474	0	hsa-let-7c	2	14	+		0.164158
TTGAGGTAGTAGGTTGTAGT	20	0	0.492474	0	hsa-let-7c	2	17	+		0.164158
GTGAGGTAGTAGGTTGTATAT	21	0	0.492474	0	hsa-let-7c	2	18	+		0.164158
ATGAGGTAGTAGGTTGTATGGAG	23	0	0.492474	0	hsa-let-7c	2	20	+		0.164158
GTGAGGTAGTAGGTTGTATGGTA	23	0	0.492474	0	hsa-let-7c	2	20	+		0.164158
TCGAGGTAGTAGGTTGTATGGTT	23	0	0.492474	0	hsa-let-7c	2	20	+		0.164158
GTGAGGTAGTAGGTTGTATGGTAA	24	0	0.492474	0	hsa-let-7c	2	21	+		0.164158
GTGAGGTAGTAGGTTGTATGGTTT	24	0	0.492474	0	hsa-let-7c	2	21	+		0.164158
CTGAGGTAGTAGGTTGTATGGTTAT	25	0	0.492474	0	hsa-let-7c	2	22	+		0.164158
TTGAGGTAGTAGGTTGTATGGTTTT	25	0	0.492474	0	hsa-let-7c	2	22	+		0.164158
TTGAGGTAGTAGGTTGT	17	0.433447	0	0	hsa-let-7c	2	14	+		0.144482
CTGAGGTAGTAGGTTGTA	18	0.433447	0	0	hsa-let-7c	2	15	+		0.144482
ATGAGGTAGTAGGTTGTAAG	20	0.433447	0	0	hsa-let-7c	2	17	+		0.144482
CTGAGGTAGTAGGTTGTAAG	20	0.433447	0	0	hsa-let-7c	2	17	+		0.144482
GTGAGGTAGTAGGTTGTAGT	20	0.433447	0	0	hsa-let-7c	2	17	+		0.144482
ATGAGGTAGTAGGTTGTATGGG	22	0.433447	0	0	hsa-let-7c	2	19	+		0.144482
AAGAGGTAGTAGGTTGTATGGTT	23	0.433447	0	0	hsa-let-7c	2	20	+		0.144482
CTGAGGTAGTAGGTTGTATGGTG	23	0.433447	0	0	hsa-let-7c	2	20	+		0.144482
CTGAGGTAGTAGGTTGTATGGTAA	24	0.433447	0	0	hsa-let-7c	2	21	+		0.144482
ATGAGGTAGTAGGTTGTATGGTTAT	25	0.433447	0	0	hsa-let-7c	2	22	+		0.144482
CTGAGGTAGTAGGTTGTATGGTTAA	25	0.433447	0	0	hsa-let-7c	2	22	+		0.144482
CTGAGGTAGTAGGTTGTATGGTTAG	25	0.433447	0	0	hsa-let-7c	2	22	+		0.144482
TGAGGTAGTAGGTTGTATGGTT	22	17217.4	28275.9	12930	hsa-let-7c	3	20	+		19474.4
TGAGGTAGTAGGTTGTATGGT	21	3214.44	5853.54	3101	hsa-let-7c	3	19	+		4056.33
TGAGGTAGTAGGTTGTATAG	20	2756.72	5162.6	3861.46	hsa-let-7c	3	18	+		3926.93
TGAGGTAGTAGGTTGTATGGTTA	23	2088.35	3487.21	1304.72	hsa-let-7c	3	21	+		2293.42
TGAGGTAGTAGGTTGTATGGTA	22	1470.25	2263.9	1195.01	hsa-let-7c	3	20	+		1643.05
TGAGGTAGTAGGTTGTATGG	20	887.699	2026.53	1149.29	hsa-let-7c	3	18	+		1354.51
TGAGGTAGTAGGTTGTATGGTTT	23	1094.45	1772.41	788.964	hsa-let-7c	3	21	+		1218.61
TGAGGTAGTAGGTTGTATGGTAA	23	781.938	1298.65	584.597	hsa-let-7c	3	21	+		888.396
TGAGGTAGTAGGTTGTATGGA	21	327.686	837.205	595.353	hsa-let-7c	3	19	+		586.748
TGAGGTAGTAGGTTGTATGGTTG	23	407.007	689.463	571.689	hsa-let-7c	3	21	+		556.053
TGAGGTAGTAGGTTGTATGGAA	22	235.795	522.022	365.709	hsa-let-7c	3	20	+		374.509
TGAGGTAGTAGGTTGTATA	19	270.904	459.478	322.147	hsa-let-7c	3	17	+		350.843
TGAGGTAGTAGGTTGTGT	18	102.727	375.265	382.919	hsa-let-7c	3	16	+		286.97
TGAGGTAGTAGGTTGTAGA	19	159.075	355.073	314.617	hsa-let-7c	3	17	+		276.255
TGAGGTAGTAGGTTGTAAA	19	179.014	372.802	269.979	hsa-let-7c	3	17	+		273.932
TGAGGTAGTAGGTTGTAT	18	193.751	352.119	243.627	hsa-let-7c	3	16	+		263.165
TGAGGTAGTAGGTTGTATAA	20	238.829	305.826	231.257	hsa-let-7c	3	18	+		258.638
TGAGGTAGTAGGTTGTATGGTAT	23	255.3	342.269	150.586	hsa-let-7c	3	21	+		249.385
TGAGGTAGTAGGTTGTA	17	122.232	257.564	301.71	hsa-let-7c	3	15	+		227.169
TGAGGTAGTAGGTTGTGA	18	96.6587	283.665	235.022	hsa-let-7c	3	16	+		205.115
TGAGGTAGTAGGTTGTATGGTTAA	24	179.88	282.68	98.4188	hsa-let-7c	3	22	+		186.993
TGAGGTAGTAGGTTGTATG	19	110.962	253.131	141.443	hsa-let-7c	3	17	+		168.512
TGAGGTAGTAGGTTGTATGGTAG	23	131.334	242.297	131.225	hsa-let-7c	3	21	+		168.285
TGAGGTAGTAGGTTGTATGGTTAT	24	156.908	219.643	103.259	hsa-let-7c	3	22	+		159.937
TGAGGTAGTAGGTTGTAG	18	67.6177	191.08	171.023	hsa-let-7c	3	16	+		143.24
TGAGGTAGTAGGTTGTAA	18	87.1228	190.587	131.225	hsa-let-7c	3	16	+		136.312
TGAGGTAGTAGGTTGTATGA	20	81.488	194.527	122.62	hsa-let-7c	3	18	+		132.878
TGAGGTAGTAGGTTGT	16	33.8089	93.57	233.946	hsa-let-7c	3	14	+		120.442
TGAGGTAGTAGGTTGTG	17	45.9454	123.611	157.04	hsa-let-7c	3	15	+		108.865
TGAGGTAGTAGGTTGTATGAA	21	47.6792	124.596	100.032	hsa-let-7c	3	19	+		90.7691
TGAGGTAGTAGGTTGTATGGTTGT	24	58.9488	124.103	68.3016	hsa-let-7c	3	22	+		83.7846
TGAGGTAGTAGGTTGTATGGTG	22	60.2491	97.0173	63.9991	hsa-let-7c	3	20	+		73.7552
TGAGGTAGTAGGTTGTATGGTGA	23	36.4095	71.4087	45.1758	hsa-let-7c	3	21	+		50.998
TGAGGTAGTAGGTTGTATGGTTAG	24	40.3106	66.4839	26.3526	hsa-let-7c	3	22	+		44.3824
TGAGGTAGTAGGTTGTATGGTTGA	24	34.6758	50.2323	37.6465	hsa-let-7c	3	22	+		40.8515
TGAGGTAGTAGGTTGTAAG	19	31.6416	50.7248	38.7221	hsa-let-7c	3	17	+		40.3628
TGAGGTAGTAGGTTGTATGGTTTT	24	27.3072	42.3527	10.7562	hsa-let-7c	3	22	+		26.8053
TGAGGTAGTAGGTTGTAGT	19	15.1706	24.6237	26.8904	hsa-let-7c	3	17	+		22.2282
TGAGGTAGTAGGTTGTATAT	20	20.8055	26.1011	10.7562	hsa-let-7c	3	18	+		19.2209
TGAGGTAGTAGGTTGTATGGTTTA	24	22.5392	24.6237	6.45369	hsa-let-7c	3	22	+		17.8722
TGAGGTAGTAGGTTGTATGGTTC	23	15.1706	23.6387	11.8318	hsa-let-7c	3	21	+		16.8804
TGAGGTAGTAGGTTGTATGGAG	22	8.23549	17.2366	22.0501	hsa-let-7c	3	20	+		15.8407
TGAGGTAGTAGGTTGTATT	19	18.6382	21.1764	6.9915	hsa-let-7c	3	17	+		15.602
TGAGGTAGTAGGTTGTAAT	19	15.1706	20.1914	10.2183	hsa-let-7c	3	17	+		15.1935
TGAGGTAGTAGGTTGTATGGTGT	23	11.7031	18.2215	12.3696	hsa-let-7c	3	21	+		14.0981
GGAGGTAGTAGGTTGTATGGTT	22	11.2696	18.714	7.52931	hsa-let-7c	3	20	+		12.5043
TGAGGTAGTAGGTTGTATGT	20	13.0034	16.2516	7.52931	hsa-let-7c	3	18	+		12.2614
TGAGGTAGTAGGTTGTATGGAT	22	9.53583	16.2516	9.68054	hsa-let-7c	3	20	+		11.8227
CGAGGTAGTAGGTTGTATGGTT	22	7.3686	11.3269	3.76465	hsa-let-7c	3	20	+		7.48671
TGAGGTAGTAGGTTGTATGGG	21	6.93515	8.37205	6.45369	hsa-let-7c	3	19	+		7.25363
TGAGGTAGTAGGTTGTATGGTC	22	7.80204	8.37205	3.76465	hsa-let-7c	3	20	+		6.64625
TGAGGTAGTAGGTTGTATGGTTTG	24	9.53583	5.41721	4.30246	hsa-let-7c	3	22	+		6.4185
TGAGGTAGTAGGTTGTATGTT	21	2.60068	9.357	3.76465	hsa-let-7c	3	19	+		5.24078
TGAGGTAGTAGGTTGTATTA	20	4.76792	8.37205	1.07562	hsa-let-7c	3	18	+		4.73853
TGAGGTAGTAGGTTGTATGGCT	22	2.16723	7.3871	4.30246	hsa-let-7c	3	20	+		4.61893
TGAGGTAGTAGGTTGTATGGGT	22	4.76792	5.41721	3.22685	hsa-let-7c	3	20	+		4.47066
AGAGGTAGTAGGTTGTATGGTT	22	4.33447	5.90968	2.68904	hsa-let-7c	3	20	+		4.31106
TGAGGTAGTAGGTTGTATGGTTAC	24	4.76792	5.41721	2.68904	hsa-let-7c	3	22	+		4.29139
TGAGGTAGTAGGTTGTATTT	20	6.06826	2.95484	3.76465	hsa-let-7c	3	18	+		4.26258
TGAGGTAGTAGGTTGTGG	18	0.866894	6.40216	4.84027	hsa-let-7c	3	16	+		4.03644
TGAGGTAGTAGGTTGAA	17	1.73379	5.41721	3.22685	hsa-let-7c	3	15	+		3.45928
GGAGGTAGTAGGTTGTATGGT	21	1.73379	5.41721	3.22685	hsa-let-7c	3	19	+		3.45928
TGAGGTAGTAGGTTGTATCG	20	0.866894	2.46237	6.45369	hsa-let-7c	3	18	+		3.26098
TGAGGTAGTAGGTTGA	16	3.90102	3.44732	2.15123	hsa-let-7c	3	14	+		3.16652
TGAGGTAGTAGGTTGTAGG	19	1.30034	5.90968	2.15123	hsa-let-7c	3	17	+		3.12042
TGAGGTAGTAGGTTGTATGGTAC	23	1.30034	4.92474	2.68904	hsa-let-7c	3	21	+		2.97137
CGAGGTAGTAGGTTGTATGGT	21	1.73379	3.93979	0.537808	hsa-let-7c	3	19	+		2.07046
GGAGGTAGTAGGTTGTATGGTTA	23	1.73379	3.93979	0.537808	hsa-let-7c	3	21	+		2.07046
GGAGGTAGTAGGTTGTATAG	20	2.16723	1.47742	2.15123	hsa-let-7c	3	18	+		1.93196
TGAGGTAGTAGGTTGTATGGAC	22	2.60068	1.47742	1.61342	hsa-let-7c	3	20	+		1.89717
TGAGGTAGTAGGTTGTATGGGA	22	1.73379	1.47742	2.15123	hsa-let-7c	3	20	+		1.78748
TGAGGTAGTAGGTTGTATGGC	21	2.16723	1.47742	1.61342	hsa-let-7c	3	19	+		1.75269
GGAGGTAGTAGGTTGTATGGTA	22	0.866894	2.46237	1.61342	hsa-let-7c	3	20	+		1.64756
TGAGGTAGTAGGTTGTATGTA	21	1.30034	2.46237	0.537808	hsa-let-7c	3	19	+		1.43351
TGAGGTAGTAGGTTGTTT	18	1.73379	2.46237	0	hsa-let-7c	3	16	+		1.39872
AGAGGTAGTAGGTTGCA	17	2.16723	1.47742	0.537808	hsa-let-7c	3	15	+		1.39415
TGAGGTAGTAGGTTGTATTG	20	0.433447	0.984947	2.68904	hsa-let-7c	3	18	+		1.36914
TCAGGTAGTAGGTTGTATGGTT	22	0	2.95484	1.07562	hsa-let-7c	3	20	+		1.34349
TAAGGTAGTAGGTTGTATGGTT	22	0.866894	1.47742	1.61342	hsa-let-7c	3	20	+		1.31925
AGAGGTAGTAGGTTGTATGGT	21	1.30034	1.96989	0.537808	hsa-let-7c	3	19	+		1.26935
TGAGGTAGTAGGTTGTATGGTTTC	24	0	1.47742	2.15123	hsa-let-7c	3	22	+		1.20955
AGAGGTAGTAGGTTGTATGGTTT	23	2.60068	0.984947	0	hsa-let-7c	3	21	+		1.19521
GGAGGTAGTAGGTTGTATGGTTT	23	0.866894	1.47742	1.07562	hsa-let-7c	3	21	+		1.13998
TTAGGTAGTAGGTTGTATGGTT	22	1.30034	1.96989	0	hsa-let-7c	3	20	+		1.09008
TGAGGTAGTAGGTTGTTA	18	2.16723	0.984947	0	hsa-let-7c	3	16	+		1.05073
CGAGGTAGTAGGTTGTATGGTA	22	0	1.96989	1.07562	hsa-let-7c	3	20	+		1.01517
TAAGGTAGTAGGTTGTATGGT	21	0.433447	0.984947	1.61342	hsa-let-7c	3	19	+		1.01061
TGAGGTAGTAGGTTGTATGGTCT	23	0.433447	2.46237	0	hsa-let-7c	3	21	+		0.965272
TGAGGTAGTAGGTTGTATAC	20	2.16723	0	0.537808	hsa-let-7c	3	18	+		0.901681
CGAGGTAGTAGGTTGTATAG	20	0	1.47742	1.07562	hsa-let-7c	3	18	+		0.851012
TGAGGTAGTAGGTTGTATGGGG	22	0	1.96989	0.537808	hsa-let-7c	3	20	+		0.835901
GGAGGTAGTAGGTTGTATGG	20	0.433447	0.984947	1.07562	hsa-let-7c	3	18	+		0.831336
AGAGGTAGTAGGTTGTATAG	20	0.433447	1.47742	0.537808	hsa-let-7c	3	18	+		0.816225
TGAGGTAGTAGGTTGTATGAG	21	0.433447	1.47742	0.537808	hsa-let-7c	3	19	+		0.816225
TGAGGTAGTAGGTTGTAAC	19	0.433447	1.96989	0	hsa-let-7c	3	17	+		0.801114
TGAGGTAGTAGGTTGTATGGTTGG	24	0.866894	1.47742	0	hsa-let-7c	3	22	+		0.781438
GGAGGTAGTAGGTTGTATGGTTG	23	0	0.984947	1.07562	hsa-let-7c	3	21	+		0.686854
AGAGGTAGTAGGTTGTATGGTA	22	0	1.96989	0	hsa-let-7c	3	20	+		0.656631
TGAGGTAGTAGGTTGTATGGTCA	23	0	1.96989	0	hsa-let-7c	3	21	+		0.656631
GGAGGTAGTAGGTTGTA	17	0.433447	0.984947	0.537808	hsa-let-7c	3	15	+		0.652067
TAAGGTAGTAGGTTGTATAG	20	0.433447	1.47742	0	hsa-let-7c	3	18	+		0.636956
TGAGGTAGTAGGTTGTATC	19	0.866894	0.492474	0.537808	hsa-let-7c	3	17	+		0.632392
TGAGGTAGTAGGTTGTATGGTGG	23	0.866894	0.984947	0	hsa-let-7c	3	21	+		0.61728
TGAGGTAGTAGGTTGTATTC	20	1.30034	0.492474	0	hsa-let-7c	3	18	+		0.597605
GGAGGTAGTAGGTTGTATGGAA	22	0	0.984947	0.537808	hsa-let-7c	3	20	+		0.507585
GGAGGTAGTAGGTTGTATGGTAA	23	0	0.984947	0.537808	hsa-let-7c	3	21	+		0.507585
TGAGGTAGTAGGTTGTATGGTCG	23	0	0.984947	0.537808	hsa-let-7c	3	21	+		0.507585
TGAGGTAGTAGGTTGTATGGTTCT	24	0.433447	0	1.07562	hsa-let-7c	3	22	+		0.503021
TAAGGTAGTAGGTTGTATGGTA	22	0.433447	0.984947	0	hsa-let-7c	3	20	+		0.472798
CGAGGTAGTAGGTTGTATGGTTA	23	0.433447	0.984947	0	hsa-let-7c	3	21	+		0.472798
AGAGGTAGTAGGTTGTATAA	20	1.30034	0	0	hsa-let-7c	3	18	+		0.433447
TAAGGTAGTAGGTTGTATGGTTA	23	1.30034	0	0	hsa-let-7c	3	21	+		0.433447
TGAGGTAGTAGGTTGAG	17	0	0	1.07562	hsa-let-7c	3	15	+		0.358538
TGAGGTAGTAGGTTGGG	17	0	0	1.07562	hsa-let-7c	3	15	+		0.358538
CGAGGTAGTAGGTTGTATGA	20	0	0	1.07562	hsa-let-7c	3	18	+		0.358538
TGAGGTAGTAGGTTGTATGAT	21	0	0	1.07562	hsa-let-7c	3	19	+		0.358538
GGAGGTAGTAGGTTGTATA	19	0	0.492474	0.537808	hsa-let-7c	3	17	+		0.343427
TGAGGTAGTAGGTTGTACG	19	0	0.492474	0.537808	hsa-let-7c	3	17	+		0.343427
CGAGGTAGTAGGTTGTATAA	20	0	0.492474	0.537808	hsa-let-7c	3	18	+		0.343427
TTAGGTAGTAGGTTGTATGGTAA	23	0	0.492474	0.537808	hsa-let-7c	3	21	+		0.343427
CGAGGTAGTAGGTTGTGA	18	0	0.984947	0	hsa-let-7c	3	16	+		0.328316
CGAGGTAGTAGGTTGTATGGA	21	0	0.984947	0	hsa-let-7c	3	19	+		0.328316
TGAGGTAGTAGGTTGTATGTG	21	0	0.984947	0	hsa-let-7c	3	19	+		0.328316
TGAGGTAGTAGGTTGTATGGTTCA	24	0	0.984947	0	hsa-let-7c	3	22	+		0.328316
TGAGGTAGTAGGTTGTATGGTTGC	24	0	0.984947	0	hsa-let-7c	3	22	+		0.328316
TGAGGTAGTAGGTTGG	16	0.433447	0	0.537808	hsa-let-7c	3	14	+		0.323751
TGAGGTAGTAGGTTGTGC	18	0.433447	0.492474	0	hsa-let-7c	3	16	+		0.30864
AGAGGTAGTAGGTTGTATA	19	0.433447	0.492474	0	hsa-let-7c	3	17	+		0.30864
CGAGGTAGTAGGTTGTATGG	20	0.433447	0.492474	0	hsa-let-7c	3	18	+		0.30864
TGAGGTAGTAGGTTGTT	17	0.866894	0	0	hsa-let-7c	3	15	+		0.288965
TCAGGTAGTAGGTTGTATGGT	21	0.866894	0	0	hsa-let-7c	3	19	+		0.288965
TGAGGTAGTAGGTTGTATGCT	21	0.866894	0	0	hsa-let-7c	3	19	+		0.288965
AGAGGTAGTAGGTTGC	16	0	0	0.537808	hsa-let-7c	3	14	+		0.179269
TGAGGTAGTAGGTTTT	16	0	0	0.537808	hsa-let-7c	3	14	+		0.179269
AGAGGTAGTAGGTTGAA	17	0	0	0.537808	hsa-let-7c	3	15	+		0.179269
GGAGGTAGTAGGTTGTAA	18	0	0	0.537808	hsa-let-7c	3	16	+		0.179269
TGAGGTAGTAGGTTGTTG	18	0	0	0.537808	hsa-let-7c	3	16	+		0.179269
CGAGGTAGTAGGTTGTATG	19	0	0	0.537808	hsa-let-7c	3	17	+		0.179269
TGAGGTAGTAGGTTGTATCA	20	0	0	0.537808	hsa-let-7c	3	18	+		0.179269
TGAGGTAGTAGGTTGTATGC	20	0	0	0.537808	hsa-let-7c	3	18	+		0.179269
GGAGGTAGTAGGTTGTATGAA	21	0	0	0.537808	hsa-let-7c	3	19	+		0.179269
TTAGGTAGTAGGTTGTATGGA	21	0	0	0.537808	hsa-let-7c	3	19	+		0.179269
TTAGGTAGTAGGTTGTATGGT	21	0	0	0.537808	hsa-let-7c	3	19	+		0.179269
CGAGGTAGTAGGTTGTATGGTAA	23	0	0	0.537808	hsa-let-7c	3	21	+		0.179269
TTAGGTAGTAGGTTGTATGGTTT	23	0	0	0.537808	hsa-let-7c	3	21	+		0.179269
GGAGGTAGTAGGTTGTATGGTTAA	24	0	0	0.537808	hsa-let-7c	3	22	+		0.179269
TGAGGTAGTAGGTTTA	16	0	0.492474	0	hsa-let-7c	3	14	+		0.164158
CGAGGTAGTAGGTTGTGT	18	0	0.492474	0	hsa-let-7c	3	16	+		0.164158
GGAGGTAGTAGGTTGTGT	18	0	0.492474	0	hsa-let-7c	3	16	+		0.164158
CGAGGTAGTAGGTTGTAAA	19	0	0.492474	0	hsa-let-7c	3	17	+		0.164158
TAAGGTAGTAGGTTGTATG	19	0	0.492474	0	hsa-let-7c	3	17	+		0.164158
GGAGGTAGTAGGTTGTATGA	20	0	0.492474	0	hsa-let-7c	3	18	+		0.164158
TAAGGTAGTAGGTTGTATGG	20	0	0.492474	0	hsa-let-7c	3	18	+		0.164158
TAAGGTAGTAGGTTGTATGGA	21	0	0.492474	0	hsa-let-7c	3	19	+		0.164158
TGAGGTAGTAGGTTGTATGAC	21	0	0.492474	0	hsa-let-7c	3	19	+		0.164158
TAAGGTAGTAGGTTGTATGGAA	22	0	0.492474	0	hsa-let-7c	3	20	+		0.164158
CGAGGTAGTAGGTTGTATGGTTG	23	0	0.492474	0	hsa-let-7c	3	21	+		0.164158
CGAGGTAGTAGGTTGTATGGTTT	23	0	0.492474	0	hsa-let-7c	3	21	+		0.164158
TAAGGTAGTAGGTTGTATGGTAT	23	0	0.492474	0	hsa-let-7c	3	21	+		0.164158
TTAGGTAGTAGGTTGTATGGTAG	23	0	0.492474	0	hsa-let-7c	3	21	+		0.164158
TTAGGTAGTAGGTTGTATGGTTA	23	0	0.492474	0	hsa-let-7c	3	21	+		0.164158
AGAGGTAGTAGGTTGTATGGTTAG	24	0	0.492474	0	hsa-let-7c	3	22	+		0.164158
CGAGGTAGTAGGTTGTATGGTTAT	24	0	0.492474	0	hsa-let-7c	3	22	+		0.164158
CGAGGTAGTAGGTTGTAA	18	0.433447	0	0	hsa-let-7c	3	16	+		0.144482
TAAGGTAGTAGGTTGTAT	18	0.433447	0	0	hsa-let-7c	3	16	+		0.144482
TGAGGTAGTAGGTTGTCT	18	0.433447	0	0	hsa-let-7c	3	16	+		0.144482
GGAGGTAGTAGGTTGTATG	19	0.433447	0	0	hsa-let-7c	3	17	+		0.144482
TAAGGTAGTAGGTTGTAAA	19	0.433447	0	0	hsa-let-7c	3	17	+		0.144482
TGAGGTAGTAGGTTGTACT	19	0.433447	0	0	hsa-let-7c	3	17	+		0.144482
AGAGGTAGTAGGTTGTATGG	20	0.433447	0	0	hsa-let-7c	3	18	+		0.144482
TGAGGTAGTAGGTTGTATGGCC	22	0.433447	0	0	hsa-let-7c	3	20	+		0.144482
AGAGGTAGTAGGTTGTATGGTTA	23	0.433447	0	0	hsa-let-7c	3	21	+		0.144482
AGAGGTAGTAGGTTGTATGGTTG	23	0.433447	0	0	hsa-let-7c	3	21	+		0.144482
AGAGGTAGTAGGTTGTATGGTTAT	24	0.433447	0	0	hsa-let-7c	3	22	+		0.144482
CGAGGTAGTAGGTTGTATGGTTAG	24	0.433447	0	0	hsa-let-7c	3	22	+		0.144482
GAGGTAGTAGGTTGTATGGTT	21	179.447	319.615	176.401	hsa-let-7c	4	20	+		225.154
GAGGTAGTAGGTTGTATAG	19	35.5426	64.0216	48.9405	hsa-let-7c	4	18	+		49.5016
GAGGTAGTAGGTTGTATGGT	20	29.0409	76.8259	31.1928	hsa-let-7c	4	19	+		45.6866
GAGGTAGTAGGTTGTATGGTTA	22	24.7065	45.8	17.7476	hsa-let-7c	4	21	+		29.4181
GAGGTAGTAGGTTGTATGGTA	21	15.1706	21.1764	15.5964	hsa-let-7c	4	20	+		17.3145
GAGGTAGTAGGTTGTATGG	19	17.7713	18.714	12.9074	hsa-let-7c	4	18	+		16.4642
GAGGTAGTAGGTTGTATGGTTT	22	14.3037	20.1914	5.91588	hsa-let-7c	4	21	+		13.4703
GAGGTAGTAGGTTGTATGGTAA	22	12.57	11.3269	8.60492	hsa-let-7c	4	21	+		10.8339
GAGGTAGTAGGTTGTATGGTTG	22	2.16723	5.41721	8.60492	hsa-let-7c	4	21	+		5.39645
GAGGTAGTAGGTTGTATGGA	20	1.30034	7.87958	6.45369	hsa-let-7c	4	19	+		5.2112
GAGGTAGTAGGTTGTATGGTAT	22	3.90102	8.86452	1.07562	hsa-let-7c	4	21	+		4.61372
GAGGTAGTAGGTTGTATGGAA	21	1.73379	5.41721	5.37808	hsa-let-7c	4	20	+		4.17636
GAGGTAGTAGGTTGTATGGTAG	22	3.90102	3.93979	3.22685	hsa-let-7c	4	21	+		3.68922
GAGGTAGTAGGTTGTATAA	19	3.03413	3.93979	3.22685	hsa-let-7c	4	18	+		3.40025
GAGGTAGTAGGTTGTAT	17	1.30034	4.43226	3.76465	hsa-let-7c	4	16	+		3.16575
GAGGTAGTAGGTTGTATGGTTAA	23	3.03413	4.92474	1.07562	hsa-let-7c	4	22	+		3.01149
GAGGTAGTAGGTTGTAAA	18	1.73379	4.92474	0.537808	hsa-let-7c	4	17	+		2.39878
GAGGTAGTAGGTTGTA	16	1.73379	3.93979	1.07562	hsa-let-7c	4	15	+		2.24973
GAGGTAGTAGGTTGTATA	18	2.60068	2.46237	1.07562	hsa-let-7c	4	17	+		2.04622
GAGGTAGTAGGTTGTGT	17	1.30034	2.95484	1.61342	hsa-let-7c	4	16	+		1.9562
GAGGTAGTAGGTTGTATGGTTAT	23	1.73379	3.93979	0	hsa-let-7c	4	22	+		1.89119
GAGGTAGTAGGTTGTGA	17	0	3.44732	2.15123	hsa-let-7c	4	16	+		1.86618
GAGGTAGTAGGTTGTATG	18	0.866894	0.984947	3.22685	hsa-let-7c	4	17	+		1.6929
GAGGTAGTAGGTTGTAA	17	0	1.47742	2.15123	hsa-let-7c	4	16	+		1.20955
GAGGTAGTAGGTTGTATGAA	20	0.866894	1.47742	1.07562	hsa-let-7c	4	19	+		1.13998
GAGGTAGTAGGTTGTATGA	19	0	0.984947	2.15123	hsa-let-7c	4	18	+		1.04539
GAGGTAGTAGGTTGTATGGTGA	22	0	0.984947	2.15123	hsa-let-7c	4	21	+		1.04539
GAGGTAGTAGGTTGTAGA	18	0	1.96989	1.07562	hsa-let-7c	4	17	+		1.01517
GAGGTAGTAGGTTGTATGGTTGT	23	0	1.96989	0	hsa-let-7c	4	22	+		0.656631
GAGGTAGTAGGTTGTAAG	18	0.433447	1.47742	0	hsa-let-7c	4	17	+		0.636956
GCGGTAGTAGGTTGTATGGTT	21	0.433447	1.47742	0	hsa-let-7c	4	20	+		0.636956
GAGGTAGTAGGTTGTATAT	19	1.73379	0	0	hsa-let-7c	4	18	+		0.577929
GAGGTAGTAGGTTGTG	16	0	0.984947	0.537808	hsa-let-7c	4	15	+		0.507585
GAGGTAGTAGGTTGTATGGTTTT	23	0	0.984947	0.537808	hsa-let-7c	4	22	+		0.507585
GAGGTAGTAGGTTGTATGGTTGA	23	0	1.47742	0	hsa-let-7c	4	22	+		0.492474
GAGGTAGTAGGTTGTAG	17	0.433447	0.492474	0.537808	hsa-let-7c	4	16	+		0.487909
GAGGTAGTAGGTTGTATGGTG	21	0.433447	0.984947	0	hsa-let-7c	4	20	+		0.472798
GAGGTAGTAGGTTGTATGGTTC	22	0.866894	0.492474	0	hsa-let-7c	4	21	+		0.453122
GAGGTAGTAGGTTGTATGGGT	21	0	0	1.07562	hsa-let-7c	4	20	+		0.358538
TGGGTAGTAGGTTGTATGGAA	21	0	0.984947	0	hsa-let-7c	4	20	+		0.328316
TGGGTAGTAGGTTGTATGGTT	21	0	0.984947	0	hsa-let-7c	4	20	+		0.328316
GTGGTAGTAGGTTGTATGGT	20	0.433447	0	0.537808	hsa-let-7c	4	19	+		0.323751
GAGGTAGTAGGTTGTATGGTC	21	0.433447	0	0.537808	hsa-let-7c	4	20	+		0.323751
GGGGTAGTAGGTTGTATGGTA	21	0.433447	0	0.537808	hsa-let-7c	4	20	+		0.323751
TAGGTAGTAGGTTGTATGGTT	21	0.433447	0	0.537808	hsa-let-7c	4	20	+		0.323751
GAGGTAGTAGGTTGTATGGTTTA	23	0.433447	0.492474	0	hsa-let-7c	4	22	+		0.30864
GAGGTAGTAGGTTGTAAT	18	0.866894	0	0	hsa-let-7c	4	17	+		0.288965
TAGGTAGTAGGTTGTATGGTTA	22	0.866894	0	0	hsa-let-7c	4	21	+		0.288965
GAGGTAGTAGGTTGTATGGG	20	0	0	0.537808	hsa-let-7c	4	19	+		0.179269
GGGGTAGTAGGTTGTATGGT	20	0	0	0.537808	hsa-let-7c	4	19	+		0.179269
GAGGTAGTAGGTTGTATGGGA	21	0	0	0.537808	hsa-let-7c	4	20	+		0.179269
TAGGTAGTAGGTTGTATGGT	20	0	0.492474	0	hsa-let-7c	4	19	+		0.164158
GAGGTAGTAGGTTGTATGGCT	21	0	0.492474	0	hsa-let-7c	4	20	+		0.164158
GTGGTAGTAGGTTGTATGGTT	21	0	0.492474	0	hsa-let-7c	4	20	+		0.164158
GAGGTAGTAGGTTGTATGGTGT	22	0	0.492474	0	hsa-let-7c	4	21	+		0.164158
GTGGTAGTAGGTTGTATGGTTT	22	0	0.492474	0	hsa-let-7c	4	21	+		0.164158
GAGGTAGTAGGTTGTATGGTTAG	23	0	0.492474	0	hsa-let-7c	4	22	+		0.164158
GAGGTAGTAGGTTGTATTG	19	0.433447	0	0	hsa-let-7c	4	18	+		0.144482
AAGGTAGTAGGTTGTATGGTT	21	0.433447	0	0	hsa-let-7c	4	20	+		0.144482
GGGGTAGTAGGTTGTATGGTT	21	0.433447	0	0	hsa-let-7c	4	20	+		0.144482
GGGGTAGTAGGTTGTATGGTTT	22	0.433447	0	0	hsa-let-7c	4	21	+		0.144482
AGGTAGTAGGTTGTATGGTT	20	30.3413	47.7699	22.5879	hsa-let-7c	5	20	+		33.5664
AGGTAGTAGGTTGTATGGT	19	3.03413	13.2968	5.37808	hsa-let-7c	5	19	+		7.23633
AGGTAGTAGGTTGTATAG	18	2.16723	6.89463	6.45369	hsa-let-7c	5	18	+		5.17185
AGGTAGTAGGTTGTATGGTTA	21	5.20136	2.46237	2.15123	hsa-let-7c	5	21	+		3.27165
AGGTAGTAGGTTGTATGGTTT	21	3.46758	4.92474	0	hsa-let-7c	5	21	+		2.79744
AGGTAGTAGGTTGTATGGTA	20	1.73379	4.92474	0	hsa-let-7c	5	20	+		2.21951
AGGTAGTAGGTTGTATGG	18	2.16723	2.95484	0.537808	hsa-let-7c	5	18	+		1.88663
AGGTAGTAGGTTGTATGGTAA	21	1.30034	3.93979	0	hsa-let-7c	5	21	+		1.74671
AGGTAGTAGGTTGTATGGTAT	21	1.73379	1.47742	1.61342	hsa-let-7c	5	21	+		1.60821
AGGTAGTAGGTTGTATGGA	19	2.60068	0.984947	0	hsa-let-7c	5	19	+		1.19521
AGGTAGTAGGTTGTATGGAA	20	1.30034	1.96989	0	hsa-let-7c	5	20	+		1.09008
AGGTAGTAGGTTGTAAA	17	0.866894	0.984947	0	hsa-let-7c	5	17	+		0.61728
AGGTAGTAGGTTGTATGGTTAT	22	1.30034	0.492474	0	hsa-let-7c	5	22	+		0.597605
AGGTAGTAGGTTGTATGA	18	0	0.492474	1.07562	hsa-let-7c	5	18	+		0.522696
AGGTAGTAGGTTGTAA	16	0	0	1.07562	hsa-let-7c	5	16	+		0.358538
AGGTAGTAGGTTGTGA	16	0	0	1.07562	hsa-let-7c	5	16	+		0.358538
AGGTAGTAGGTTGTAT	16	0	0.492474	0.537808	hsa-let-7c	5	16	+		0.343427
AGGTAGTAGGTTGTATGGTG	20	0	0.984947	0	hsa-let-7c	5	20	+		0.328316
AGGTAGTAGGTTGTGT	16	0.433447	0.492474	0	hsa-let-7c	5	16	+		0.30864
AGGTAGTAGGTTGTATA	17	0.433447	0.492474	0	hsa-let-7c	5	17	+		0.30864
AGGTAGTAGGTTGTAGA	17	0	0	0.537808	hsa-let-7c	5	17	+		0.179269
TGGTAGTAGGTTGTAAA	17	0	0	0.537808	hsa-let-7c	5	17	+		0.179269
AGGTAGTAGGTTGTATAA	18	0	0	0.537808	hsa-let-7c	5	18	+		0.179269
AGGTAGTAGGTTGTATGGG	19	0	0	0.537808	hsa-let-7c	5	19	+		0.179269
TGGTAGTAGGTTGTATGGTT	20	0	0	0.537808	hsa-let-7c	5	20	+		0.179269
AGGTAGTAGGTTGTAC	16	0	0.492474	0	hsa-let-7c	5	16	+		0.164158
AGGTAGTAGGTTGTAGT	17	0	0.492474	0	hsa-let-7c	5	17	+		0.164158
AAGTAGTAGGTTGTATGGT	19	0	0.492474	0	hsa-let-7c	5	19	+		0.164158
TGGTAGTAGGTTGTATGGT	19	0	0.492474	0	hsa-let-7c	5	19	+		0.164158
TGGTAGTAGGTTGTATGGTA	20	0	0.492474	0	hsa-let-7c	5	20	+		0.164158
AGGTAGTAGGTTGTATGGTTAA	22	0	0.492474	0	hsa-let-7c	5	22	+		0.164158
AGGTAGTAGGTTGTAG	16	0.433447	0	0	hsa-let-7c	5	16	+		0.144482
AGGTAGTAGGTTGTATGT	18	0.433447	0	0	hsa-let-7c	5	18	+		0.144482
AGGTAGTAGGTTGTATGGC	19	0.433447	0	0	hsa-let-7c	5	19	+		0.144482
GGGTAGTAGGTTGTATGGTTT	21	0.433447	0	0	hsa-let-7c	5	21	+		0.144482
GGTAGTAGGTTGTATGGTT	19	6.5017	6.40216	2.68904	hsa-let-7c	6	20	+		5.19763
GGTAGTAGGTTGTATGGT	18	0.866894	2.95484	0.537808	hsa-let-7c	6	19	+		1.45318
GGTAGTAGGTTGTATAG	17	0.433447	1.96989	1.61342	hsa-let-7c	6	18	+		1.33892
GGTAGTAGGTTGTATGGTTA	20	0.433447	0.492474	1.07562	hsa-let-7c	6	21	+		0.667179
GGTAGTAGGTTGTATGGTTT	20	0	1.47742	0	hsa-let-7c	6	21	+		0.492474
GGTAGTAGGTTGTAAA	16	0	0	1.07562	hsa-let-7c	6	17	+		0.358538
TGTAGTAGGTTGTATGGTT	19	0	0	1.07562	hsa-let-7c	6	20	+		0.358538
GGTAGTAGGTTGTATA	16	0	0.492474	0.537808	hsa-let-7c	6	17	+		0.343427
GGTAGTAGGTTGTATGGTA	19	0	0.492474	0.537808	hsa-let-7c	6	20	+		0.343427
GGTAGTAGGTTGTAGA	16	0	0	0.537808	hsa-let-7c	6	17	+		0.179269
GGTAGTAGGTTGTATGA	17	0	0	0.537808	hsa-let-7c	6	18	+		0.179269
GGTAGTAGGTTGTATGGA	18	0	0	0.537808	hsa-let-7c	6	19	+		0.179269
CGTAGTAGGTTGTATGGTT	19	0	0	0.537808	hsa-let-7c	6	20	+		0.179269
GGTAGTAGGTTGTATAA	17	0	0.492474	0	hsa-let-7c	6	18	+		0.164158
TGTAGTAGGTTGTATGGTA	19	0	0.492474	0	hsa-let-7c	6	20	+		0.164158
GGTAGTAGGTTGTATGG	17	0.433447	0	0	hsa-let-7c	6	18	+		0.144482
AGTAGTAGGTTGTATGGTAA	20	0.433447	0	0	hsa-let-7c	6	21	+		0.144482
GTAGTAGGTTGTATGGTT	18	5.63481	15.7592	6.9915	hsa-let-7c	7	20	+		9.46182
GTAGTAGGTTGTATGGT	17	0.866894	3.44732	1.07562	hsa-let-7c	7	19	+		1.79661
GTAGTAGGTTGTATGGTTT	19	0	0	4.30246	hsa-let-7c	7	21	+		1.43415
GTAGTAGGTTGTATAG	16	0	2.46237	0.537808	hsa-let-7c	7	18	+		1.00006
GTAGTAGGTTGTATGGTTA	19	0	0	2.15123	hsa-let-7c	7	21	+		0.717077
TGAGTAGGTTGTATGGTAA	19	0	0	1.61342	hsa-let-7c	7	21	+		0.537808
GTAGTAGGTTGTATGG	16	0.433447	0.492474	0	hsa-let-7c	7	18	+		0.30864
GTAGTAGGTTGTATGGTAA	19	0.433447	0.492474	0	hsa-let-7c	7	21	+		0.30864
GTAGTAGGTTGTATGGAA	18	0.866894	0	0	hsa-let-7c	7	20	+		0.288965
AAAGTAGGTTGTATGGTA	18	0	0.492474	0	hsa-let-7c	7	20	+		0.164158
TGAGTAGGTTGTATGGTGA	19	0	0.492474	0	hsa-let-7c	7	21	+		0.164158
ATAGTAGGTTGTATGGTAA	19	0.433447	0	0	hsa-let-7c	7	21	+		0.144482
TAGTAGGTTGTATGGTT	17	1.73379	0.984947	0	hsa-let-7c	8	20	+		0.906245
TAGTAGGTTGTATGGAA	17	0	0	1.61342	hsa-let-7c	8	20	+		0.537808
TAGTAGGTTGTATGGT	16	1.30034	0	0	hsa-let-7c	8	19	+		0.433447
TAGTAGGTTGTATGGTAA	18	0	0	1.07562	hsa-let-7c	8	21	+		0.358538
TAGTAGGTTGTATGGTA	17	0	0	0.537808	hsa-let-7c	8	20	+		0.179269
TAGTAGGTTGTATGGTAG	18	0	0.492474	0	hsa-let-7c	8	21	+		0.164158
AGTAGGTTGTATGGTT	16	0.866894	0.492474	0	hsa-let-7c	9	20	+		0.453122
AGTAGGTTGTATGGTTAT	18	0	0.492474	0	hsa-let-7c	9	22	+		0.164158
AGTAGGTTGTATGGTTT	17	0.433447	0	0	hsa-let-7c	9	21	+		0.144482
GTAGGTTGTATGGTTG	16	0.433447	0	2.15123	hsa-let-7c	10	21	+		0.861559
GTAGGTTGTATGGTTA	16	0.433447	1.96989	0	hsa-let-7c	10	21	+		0.801114
GTAGGTTGTATGGTTT	16	0	0.492474	1.07562	hsa-let-7c	10	21	+		0.522696
GTAGGTTGTATGGTTAG	17	0	0	0.537808	hsa-let-7c	10	22	+		0.179269
AAAGAGGTAGTAGGTTGCATAGTT	24	3.03413	0	0	hsa-let-7d	1	20	+		1.01138
AAAGAGGTAGTAGGTTGCATAGT	23	2.16723	0	0	hsa-let-7d	1	19	+		0.722412
CCAGAGGTAGTAGGTTGCATAGTT	24	0	1.47742	0	hsa-let-7d	1	20	+		0.492474
AAAGAGGTAGTAGGTTGCATAGTTG	25	1.30034	0	0	hsa-let-7d	1	21	+		0.433447
CAAGAGGTAGTAGGTTGCAT	20	0.866894	0	0	hsa-let-7d	1	16	+		0.288965
CCAGAGGTAGTAGGTTGCATAGT	23	0	0	0.537808	hsa-let-7d	1	19	+		0.179269
CCAGAGGTAGTAGGTTGCATAGTG	24	0	0	0.537808	hsa-let-7d	1	20	+		0.179269
AAAGAGGTAGTAGGTTGCATAG	22	0.433447	0	0	hsa-let-7d	1	18	+		0.144482
ATAGAGGTAGTAGGTTGCATAG	22	0.433447	0	0	hsa-let-7d	1	18	+		0.144482
AAAGAGGTAGTAGGTTGCATAGTG	24	0.433447	0	0	hsa-let-7d	1	20	+		0.144482
ACAGAGGTAGTAGGTTGCATAGTT	24	0.433447	0	0	hsa-let-7d	1	20	+		0.144482
CTAGAGGTAGTAGGTTGCATAGTT	24	0.433447	0	0	hsa-let-7d	1	20	+		0.144482
GAAGAGGTAGTAGGTTGCATAGTT	24	0.433447	0	0	hsa-let-7d	1	20	+		0.144482
AAGAGGTAGTAGGTTGCATAGTT	23	29.9078	0	0.537808	hsa-let-7d	2	20	+		10.1485
AAGAGGTAGTAGGTTGCATAGT	22	9.96928	1.96989	0	hsa-let-7d	2	19	+		3.97972
AAGAGGTAGTAGGTTGCATAGTTA	24	3.90102	0.984947	0	hsa-let-7d	2	21	+		1.62866
CAGAGGTAGTAGGTTGCATAGT	22	0.866894	0.984947	2.68904	hsa-let-7d	2	19	+		1.51363
AAGAGGTAGTAGGTTGCATAG	21	3.90102	0	0	hsa-let-7d	2	18	+		1.30034
TTGAGGTAGTAGGTTGTA	18	0.866894	2.95484	0	hsa-let-7d	2	15	+		1.27391
AAGAGGTAGTAGGTTGCATAGTTT	24	3.46758	0	0	hsa-let-7d	2	21	+		1.15586
TAGAGGTAGTAGGTTGCATAGTT	23	1.73379	0	1.07562	hsa-let-7d	2	20	+		0.936468
CAGAGGTAGTAGGTTGCATAGTT	23	1.30034	1.47742	0	hsa-let-7d	2	20	+		0.92592
TAGAGGTAGTAGGTTGCATAA	21	1.73379	0	0	hsa-let-7d	2	18	+		0.577929
AAGAGGTAGTAGGTTGCATAGTA	23	1.73379	0	0	hsa-let-7d	2	20	+		0.577929
GTGAGGTAGTAGGTTGTA	18	0	0.984947	0.537808	hsa-let-7d	2	15	+		0.507585
TAGAGGTAGTAGGTTGCATAGT	22	0.433447	0.492474	0	hsa-let-7d	2	19	+		0.30864
AAGAGGTAGTAGGTTGCATAGA	22	0.866894	0	0	hsa-let-7d	2	19	+		0.288965
GTGAGGTAGTAGGTTGT	17	0	0	0.537808	hsa-let-7d	2	14	+		0.179269
TTGAGGTAGTAGGTTGTG	18	0	0	0.537808	hsa-let-7d	2	15	+		0.179269
GAGAGGTAGTAGGTTGCATAGA	22	0	0	0.537808	hsa-let-7d	2	19	+		0.179269
CTGAGGTAGTAGGTTGT	17	0	0.492474	0	hsa-let-7d	2	14	+		0.164158
GAGAGGTAGTAGGTTGCATAGTAA	24	0	0.492474	0	hsa-let-7d	2	21	+		0.164158
TTGAGGTAGTAGGTTGT	17	0.433447	0	0	hsa-let-7d	2	14	+		0.144482
CTGAGGTAGTAGGTTGTA	18	0.433447	0	0	hsa-let-7d	2	15	+		0.144482
CAGAGGTAGTAGGTTGCATGA	21	0.433447	0	0	hsa-let-7d	2	18	+		0.144482
AAGAGGTAGTAGGTTGCATAGTAA	24	0.433447	0	0	hsa-let-7d	2	21	+		0.144482
AAGAGGTAGTAGGTTGCATAGTAT	24	0.433447	0	0	hsa-let-7d	2	21	+		0.144482
CAGAGGTAGTAGGTTGCATAGTAA	24	0.433447	0	0	hsa-let-7d	2	21	+		0.144482
GAGAGGTAGTAGGTTGCATAGTTA	24	0.433447	0	0	hsa-let-7d	2	21	+		0.144482
TAGAGGTAGTAGGTTGCATAGTTA	24	0.433447	0	0	hsa-let-7d	2	21	+		0.144482
AGAGGTAGTAGGTTGCATAGTT	22	1002.13	814.059	489.943	hsa-let-7d	3	20	+		768.71
AGAGGTAGTAGGTTGCATAGT	21	416.976	382.652	290.416	hsa-let-7d	3	19	+		363.348
TGAGGTAGTAGGTTGTA	17	122.232	257.564	301.71	hsa-let-7d	3	15	+		227.169
TGAGGTAGTAGGTTGT	16	33.8089	93.57	233.946	hsa-let-7d	3	14	+		120.442
AGAGGTAGTAGGTTGCATAGTTA	23	148.672	124.103	81.2089	hsa-let-7d	3	21	+		117.995
TGAGGTAGTAGGTTGTG	17	45.9454	123.611	157.04	hsa-let-7d	3	15	+		108.865
AGAGGTAGTAGGTTGCATAGTTT	23	93.1911	80.7657	49.4783	hsa-let-7d	3	21	+		74.4783
AGAGGTAGTAGGTTGCATAG	20	78.0204	78.3033	60.7722	hsa-let-7d	3	18	+		72.3653
AGAGGTAGTAGGTTGCATAGTA	22	52.8805	49.2474	27.4282	hsa-let-7d	3	20	+		43.1854
AGAGGTAGTAGGTTGCATAGTAA	23	45.9454	29.0559	18.8233	hsa-let-7d	3	21	+		31.2749
AGAGGTAGTAGGTTGCATAGA	21	22.9727	25.1162	19.8989	hsa-let-7d	3	19	+		22.6626
AGAGGTAGTAGGTTGCATAGTTG	23	16.471	16.2516	17.2098	hsa-let-7d	3	21	+		16.6442
AGAGGTAGTAGGTTGCATAGAA	22	11.2696	11.8194	9.68054	hsa-let-7d	3	20	+		10.9232
AGAGGTAGTAGGTTGCATAGTTAA	24	12.57	12.8043	5.37808	hsa-let-7d	3	22	+		10.2508
AGAGGTAGTAGGTTGCATAGTAG	23	14.7372	6.89463	6.45369	hsa-let-7d	3	21	+		9.36184
TGAGGTAGTAGGTTGCATAGTT	22	4.33447	13.2968	9.68054	hsa-let-7d	3	20	+		9.10393
AGAGGTAGTAGGTTGCATAGTAT	23	9.96928	6.40216	5.37808	hsa-let-7d	3	21	+		7.24984
AGAGGTAGTAGGTTGCATA	19	8.66894	4.43226	3.76465	hsa-let-7d	3	17	+		5.62195
AGAGGTAGTAGGTTGCATAA	20	7.80204	5.90968	2.15123	hsa-let-7d	3	18	+		5.28765
AGAGGTAGTAGGTTGCATAGTTAT	24	8.23549	3.93979	1.07562	hsa-let-7d	3	22	+		4.41697
TGAGGTAGTAGGTTGCATAGT	21	2.16723	5.41721	3.22685	hsa-let-7d	3	19	+		3.60376
TGAGGTAGTAGGTTGAA	17	1.73379	5.41721	3.22685	hsa-let-7d	3	15	+		3.45928
AGAGGTAGTAGGTTGCATAGTG	22	3.46758	3.93979	2.68904	hsa-let-7d	3	20	+		3.36547
TGAGGTAGTAGGTTGA	16	3.90102	3.44732	2.15123	hsa-let-7d	3	14	+		3.16652
AGAGGTAGTAGGTTGCAT	18	1.30034	1.96989	5.91588	hsa-let-7d	3	16	+		3.06204
AGAGGTAGTAGGTTGCATAGTTTA	24	2.60068	3.44732	1.61342	hsa-let-7d	3	22	+		2.55381
AGAGGTAGTAGGTTGCATAAA	21	3.90102	2.46237	1.07562	hsa-let-7d	3	19	+		2.47967
AGAGGTAGTAGGTTGCATAGTTAG	24	1.73379	2.46237	2.68904	hsa-let-7d	3	22	+		2.29506
AGAGGTAGTAGGTTGCAAA	19	3.03413	1.47742	2.15123	hsa-let-7d	3	17	+		2.22093
AGAGGTAGTAGGTTGCATAGTTGA	24	2.16723	1.96989	2.15123	hsa-let-7d	3	22	+		2.09612
AGAGGTAGTAGGTTGCATAGTTGT	24	2.60068	2.46237	1.07562	hsa-let-7d	3	22	+		2.04622
AGAGGTAGTAGGTTGCATAGTGA	23	3.03413	0.492474	1.61342	hsa-let-7d	3	21	+		1.71334
AGAGGTAGTAGGTTGCA	17	2.16723	1.47742	0.537808	hsa-let-7d	3	15	+		1.39415
TGAGGTAGTAGGTTGCATAGTTA	23	0	3.44732	0.537808	hsa-let-7d	3	21	+		1.32837
AGAGGTAGTAGGTTGCATAGTTC	23	0.866894	2.46237	0.537808	hsa-let-7d	3	21	+		1.28902
TGAGGTAGTAGGTTGCATAGA	21	1.30034	1.47742	0	hsa-let-7d	3	19	+		0.92592
AGAGGTAGTAGGTTGCATAGG	21	0.433447	0.492474	1.61342	hsa-let-7d	3	19	+		0.846448
TGAGGTAGTAGGTTGCATAGTA	22	0.433447	1.47742	0.537808	hsa-let-7d	3	20	+		0.816225
AGAGGTAGTAGGTTGCAA	18	1.30034	0	1.07562	hsa-let-7d	3	16	+		0.791985
AGAGGTAGTAGGTTGCATAGTTTT	24	1.30034	0.492474	0.537808	hsa-let-7d	3	22	+		0.776874
AGAGGTAGTAGGTTGCATAGC	21	0	0.492474	1.61342	hsa-let-7d	3	19	+		0.701965
GGAGGTAGTAGGTTGTA	17	0.433447	0.984947	0.537808	hsa-let-7d	3	15	+		0.652067
TGAGGTAGTAGGTTGCATAG	20	0	0.492474	1.07562	hsa-let-7d	3	18	+		0.522696
TGAGGTAGTAGGTTGCATAGTTG	23	0.433447	0	1.07562	hsa-let-7d	3	21	+		0.503021
AGAGGTAGTAGGTTGCATGA	20	0	1.47742	0	hsa-let-7d	3	18	+		0.492474
AGAGGTAGTAGGTTGCATT	19	0.433447	0.492474	0.537808	hsa-let-7d	3	17	+		0.487909
AGAGGTAGTAGGTTGCATAT	20	0.866894	0.492474	0	hsa-let-7d	3	18	+		0.453122
AGAGGTAGTAGGTTGCATAGTC	22	0.866894	0.492474	0	hsa-let-7d	3	20	+		0.453122
AGAGGTAGTAGGTTGCATAGTTTG	24	1.30034	0	0	hsa-let-7d	3	22	+		0.433447
TGAGGTAGTAGGTTGAG	17	0	0	1.07562	hsa-let-7d	3	15	+		0.358538
TGAGGTAGTAGGTTGGG	17	0	0	1.07562	hsa-let-7d	3	15	+		0.358538
AGAGGTAGTAGGTTGCAG	18	0	0	1.07562	hsa-let-7d	3	16	+		0.358538
TGAGGTAGTAGGTTGCATAGAA	22	0	0	1.07562	hsa-let-7d	3	20	+		0.358538
AGAGGTAGTAGGTTGCATAGAT	22	0	0.492474	0.537808	hsa-let-7d	3	20	+		0.343427
TGAGGTAGTAGGTTGG	16	0.433447	0	0.537808	hsa-let-7d	3	14	+		0.323751
GGAGGTAGTAGGTTGCATAGTT	22	0.433447	0	0.537808	hsa-let-7d	3	20	+		0.323751
TGAGGTAGTAGGTTGTT	17	0.866894	0	0	hsa-let-7d	3	15	+		0.288965
AGAGGTAGTAGGTTGCATG	19	0.866894	0	0	hsa-let-7d	3	17	+		0.288965
TGAGGTAGTAGGTTGCATAGTTT	23	0.866894	0	0	hsa-let-7d	3	21	+		0.288965
AGAGGTAGTAGGTTGC	16	0	0	0.537808	hsa-let-7d	3	14	+		0.179269
TGAGGTAGTAGGTTTT	16	0	0	0.537808	hsa-let-7d	3	14	+		0.179269
AGAGGTAGTAGGTTGAA	17	0	0	0.537808	hsa-let-7d	3	15	+		0.179269
AGAGGTAGTAGGTTGCATAAG	21	0	0	0.537808	hsa-let-7d	3	19	+		0.179269
GGAGGTAGTAGGTTGCATAGT	21	0	0	0.537808	hsa-let-7d	3	19	+		0.179269
GGAGGTAGTAGGTTGCATAGTTT	23	0	0	0.537808	hsa-let-7d	3	21	+		0.179269
TGAGGTAGTAGGTTGCATAGTTC	23	0	0	0.537808	hsa-let-7d	3	21	+		0.179269
TGAGGTAGTAGGTTTA	16	0	0.492474	0	hsa-let-7d	3	14	+		0.164158
AGAGGTAGTAGGTTGCAAG	19	0	0.492474	0	hsa-let-7d	3	17	+		0.164158
AGAGGTAGTAGGTTGCAGA	19	0	0.492474	0	hsa-let-7d	3	17	+		0.164158
TGAGGTAGTAGGTTGCATGG	20	0	0.492474	0	hsa-let-7d	3	18	+		0.164158
AGAGGTAGTAGGTTGCATAGTAC	23	0	0.492474	0	hsa-let-7d	3	21	+		0.164158
AGAGGTAGTAGGTTGCATAGTCA	23	0	0.492474	0	hsa-let-7d	3	21	+		0.164158
TGAGGTAGTAGGTTGCAAA	19	0.433447	0	0	hsa-let-7d	3	17	+		0.144482
AGAGGTAGTAGGTTGCATACT	21	0.433447	0	0	hsa-let-7d	3	19	+		0.144482
AGAGGTAGTAGGTTGCATATT	21	0.433447	0	0	hsa-let-7d	3	19	+		0.144482
TGAGGTAGTAGGTTGCATACT	21	0.433447	0	0	hsa-let-7d	3	19	+		0.144482
AGAGGTAGTAGGTTGCATAGAG	22	0.433447	0	0	hsa-let-7d	3	20	+		0.144482
CGAGGTAGTAGGTTGCATAGTT	22	0.433447	0	0	hsa-let-7d	3	20	+		0.144482
AGAGGTAGTAGGTTGCATAGTCT	23	0.433447	0	0	hsa-let-7d	3	21	+		0.144482
GAGGTAGTAGGTTGCATAGTT	21	17.3379	17.729	10.2183	hsa-let-7d	4	20	+		15.0951
GAGGTAGTAGGTTGCATAGT	20	11.2696	6.89463	2.15123	hsa-let-7d	4	19	+		6.77183
GAGGTAGTAGGTTGTA	16	1.73379	3.93979	1.07562	hsa-let-7d	4	15	+		2.24973
GAGGTAGTAGGTTGCATAGTTT	22	3.46758	0.492474	2.15123	hsa-let-7d	4	21	+		2.03709
GAGGTAGTAGGTTGCATAGTTA	22	1.73379	0.492474	2.15123	hsa-let-7d	4	21	+		1.45916
GAGGTAGTAGGTTGCATAGTAA	22	2.60068	0.492474	1.07562	hsa-let-7d	4	21	+		1.38959
GAGGTAGTAGGTTGCATAG	19	1.30034	1.96989	0.537808	hsa-let-7d	4	18	+		1.26935
GAGGTAGTAGGTTGCATAGTA	21	2.16723	0.492474	1.07562	hsa-let-7d	4	20	+		1.24511
GAGGTAGTAGGTTGCATAGAA	21	0	1.96989	0	hsa-let-7d	4	20	+		0.656631
GAGGTAGTAGGTTGTG	16	0	0.984947	0.537808	hsa-let-7d	4	15	+		0.507585
GAGGTAGTAGGTTGCATAGTTAT	23	0	0	1.07562	hsa-let-7d	4	22	+		0.358538
CTGGTAGTAGGTTGCATAGTT	21	0.866894	0	0	hsa-let-7d	4	20	+		0.288965
GAGGTAGTAGGTTGCATAGTAT	22	0.866894	0	0	hsa-let-7d	4	21	+		0.288965
GAGGTAGTAGGTTGCATAGA	20	0.433447	0	0	hsa-let-7d	4	19	+		0.144482
GAGGTAGTAGGTTGCATAGTAG	22	0.433447	0	0	hsa-let-7d	4	21	+		0.144482
GCGGTAGTAGGTTGCATAGTAT	22	0.433447	0	0	hsa-let-7d	4	21	+		0.144482
AGGTAGTAGGTTGCATAGTT	20	2.16723	2.46237	0.537808	hsa-let-7d	5	20	+		1.72247
AGGTAGTAGGTTGCATAGT	19	0.433447	0.984947	0	hsa-let-7d	5	19	+		0.472798
AGGTAGTAGGTTGCATAGTTA	21	0.433447	0.492474	0	hsa-let-7d	5	21	+		0.30864
CCGTAGTAGGTTGCATAGTT	20	0	0.492474	0	hsa-let-7d	5	20	+		0.164158
AGGTAGTAGGTTGCATAAA	19	0.433447	0	0	hsa-let-7d	5	19	+		0.144482
GGTAGTAGGTTGCATAGTT	19	0.433447	1.96989	1.07562	hsa-let-7d	6	20	+		1.15965
GGTAGTAGGTTGCATAGT	18	1.30034	1.96989	0	hsa-let-7d	6	19	+		1.09008
GGTAGTAGGTTGCATAGTTA	20	0	1.47742	0	hsa-let-7d	6	21	+		0.492474
GGTAGTAGGTTGCATAGA	18	0	0	0.537808	hsa-let-7d	6	19	+		0.179269
GTAGTAGGTTGCATAGTT	18	1.30034	2.46237	0	hsa-let-7d	7	20	+		1.25424
GTAGTAGGTTGCATAGT	17	0.866894	0.492474	1.61342	hsa-let-7d	7	19	+		0.99093
TAGTAGGTTGCATAGTT	17	0.866894	0	1.07562	hsa-let-7d	8	20	+		0.647503
AAGTAGGTTGCATAGTT	17	0.433447	0	0	hsa-let-7d	8	20	+		0.144482
GTAGGTTGCATAGTTAG	17	0	0.492474	0	hsa-let-7d	10	22	+		0.164158
AACTATACGACCTGCTGCCTTTCC	24	0.866894	0	0	hsa-let-7d*	1	20	+		0.288965
AACTATACGACCTGCTGCCTTTCT	24	0.866894	0	0	hsa-let-7d*	1	20	+		0.288965
TTCTATACGACCTGCTGCCTTTCT	24	0	0.492474	0	hsa-let-7d*	1	20	+		0.164158
ATCTATACGACCTGCTGCCTTT	22	0.433447	0	0	hsa-let-7d*	1	18	+		0.144482
ATCTATACGACCTGCTGCCTTTC	23	0.433447	0	0	hsa-let-7d*	1	19	+		0.144482
ACTATACGACCTGCTGCCTTTCT	23	2.60068	0.984947	0	hsa-let-7d*	2	20	+		1.19521
GCTATACGACCTGCTGCCTTTCT	23	0	0	1.61342	hsa-let-7d*	2	20	+		0.537808
ACTATACGACCTGCTGCCTTTCA	23	1.30034	0	0	hsa-let-7d*	2	20	+		0.433447
ACTATACGACCTGCTGCCTTTC	22	0.866894	0	0	hsa-let-7d*	2	19	+		0.288965
AGTATACGACCTGCTGCCTTTCT	23	0.433447	0	0	hsa-let-7d*	2	20	+		0.144482
GCTATACGACCTGCTGCCTTTCG	23	0.433447	0	0	hsa-let-7d*	2	20	+		0.144482
CTATACGACCTGCTGCCTTTCT	22	301.679	300.901	267.29	hsa-let-7d*	3	20	+		289.957
CTATACGACCTGCTGCCTTTC	21	133.068	124.103	135.527	hsa-let-7d*	3	19	+		130.9
CTATACGACCTGCTGCCTTT	20	42.9112	37.9205	42.4868	hsa-let-7d*	3	18	+		41.1062
CTATACGACCTGCTGCCTTTCA	22	41.6109	39.8904	31.1928	hsa-let-7d*	3	20	+		37.5647
CTATACGACCTGCTGCCTTTCC	22	9.53583	5.90968	1.61342	hsa-let-7d*	3	20	+		5.68631
CTATACGACCTGCTGCCTTTCTA	23	3.46758	2.95484	5.91588	hsa-let-7d*	3	21	+		4.11277
CTATACGACCTGCTGCCTTTA	21	3.90102	2.46237	4.30246	hsa-let-7d*	3	19	+		3.55528
CTATACGACCTGCTGCCTTTCG	22	2.16723	1.47742	3.76465	hsa-let-7d*	3	20	+		2.46977
CTATACGACCTGCTGCCTTTCCA	23	1.73379	2.46237	2.68904	hsa-let-7d*	3	21	+		2.29506
CTATACGACCTGCTGCCTTTCAA	23	2.60068	0.984947	2.68904	hsa-let-7d*	3	21	+		2.09156
CTATACGACCTGCTGCCTTTCTT	23	2.60068	2.46237	1.07562	hsa-let-7d*	3	21	+		2.04622
CTATACGACCTGCTGCCTTTAA	22	0.433447	3.44732	1.07562	hsa-let-7d*	3	20	+		1.65213
CTATACGACCTGCTGCCTTTT	21	3.46758	0.492474	0.537808	hsa-let-7d*	3	19	+		1.49929
CTATACGACCTGCTGCCTT	19	3.03413	0	1.07562	hsa-let-7d*	3	17	+		1.36991
CTATACGACCTGCTGCCTTTCTAG	24	1.73379	1.47742	0	hsa-let-7d*	3	22	+		1.0704
CTATACGACCTGCTGCCTTTCAT	23	0	1.96989	1.07562	hsa-let-7d*	3	21	+		1.01517
CTATACGACCTGCTGCCTTAA	21	1.73379	0.492474	0	hsa-let-7d*	3	19	+		0.742087
ATATACGACCTGCTGCCTTTCT	22	1.73379	0	0	hsa-let-7d*	3	20	+		0.577929
CTATACGACCTGCTGCC	17	0	1.47742	0	hsa-let-7d*	3	15	+		0.492474
CTATACGACCTGCTGCCTTTCGA	23	0	1.47742	0	hsa-let-7d*	3	21	+		0.492474
CTATACGACCTGCTGCCTTTCTGA	24	0	1.47742	0	hsa-let-7d*	3	22	+		0.492474
CTATACGACCTGCTGCCTTTTT	22	0.433447	0.492474	0.537808	hsa-let-7d*	3	20	+		0.487909
CTATACGACCTGCTGCCTTTCTAA	24	0.866894	0	0.537808	hsa-let-7d*	3	22	+		0.468234
CTATACGACCTGCTGCCTTTAT	22	0.866894	0.492474	0	hsa-let-7d*	3	20	+		0.453122
CTATACGACCTGCTGCCT	18	0.433447	0	0.537808	hsa-let-7d*	3	16	+		0.323751
CTATACGACCTGCTGCCTTCT	21	0.433447	0.492474	0	hsa-let-7d*	3	19	+		0.30864
CTATACGACCTGCTGCCTTTCAG	23	0.433447	0.492474	0	hsa-let-7d*	3	21	+		0.30864
CTATACGACCTGCTGCCTAT	20	0.866894	0	0	hsa-let-7d*	3	18	+		0.288965
CTATACGACCTGCTGCCTTTCTG	23	0.866894	0	0	hsa-let-7d*	3	21	+		0.288965
CTATACGACCTGCTGCCTGA	20	0	0	0.537808	hsa-let-7d*	3	18	+		0.179269
CTATACGACCTGCTGCCTTCC	21	0	0	0.537808	hsa-let-7d*	3	19	+		0.179269
CTATACGACCTGCTGCCTTTAG	22	0	0	0.537808	hsa-let-7d*	3	20	+		0.179269
CTATACGACCTGCTGCCTTTTA	22	0	0	0.537808	hsa-let-7d*	3	20	+		0.179269
ATATACGACCTGCTGCCTTTC	21	0	0.492474	0	hsa-let-7d*	3	19	+		0.164158
CTATACGACCTGCTGCCTTTGT	22	0	0.492474	0	hsa-let-7d*	3	20	+		0.164158
TTATACGACCTGCTGCCTTTCT	22	0	0.492474	0	hsa-let-7d*	3	20	+		0.164158
CTATACGACCTGCTGC	16	0.433447	0	0	hsa-let-7d*	3	14	+		0.144482
CTATACGACCTGCTGCCTTA	20	0.433447	0	0	hsa-let-7d*	3	18	+		0.144482
TTATACGACCTGCTGCCTTT	20	0.433447	0	0	hsa-let-7d*	3	18	+		0.144482
CTATACGACCTGCTGCCTTAT	21	0.433447	0	0	hsa-let-7d*	3	19	+		0.144482
TTATACGACCTGCTGCCTTTC	21	0.433447	0	0	hsa-let-7d*	3	19	+		0.144482
CTATACGACCTGCTGCCTTTCTTT	24	0.433447	0	0	hsa-let-7d*	3	22	+		0.144482
TATACGACCTGCTGCCTTTCT	21	17.7713	10.8344	16.672	hsa-let-7d*	4	20	+		15.0926
TATACGACCTGCTGCCTTTC	20	5.63481	6.89463	4.84027	hsa-let-7d*	4	19	+		5.7899
TATACGACCTGCTGCCTTT	19	2.16723	2.95484	1.61342	hsa-let-7d*	4	18	+		2.24517
TATACGACCTGCTGCCTTTCA	21	3.03413	1.96989	1.61342	hsa-let-7d*	4	20	+		2.20582
TATACGACCTGCTGCCTTTAT	21	0	0	0.537808	hsa-let-7d*	4	20	+		0.179269
TATACGACCTGCTGCCTTTCGT	22	0	0.492474	0	hsa-let-7d*	4	21	+		0.164158
TATACGACCTGCTGCCTTTCTT	22	0.433447	0	0	hsa-let-7d*	4	21	+		0.144482
[truncated: 33,282 more rows]

## Sheet: Supplemental Table S2
miR-140-5p (433)	miR-140-3p.1 (665)	miR-140-3p.2 (495)	5p and 3p.1 (46)	5p and 3p.2 (51)	3p.1 and 3p.2 (133)	5p, 3p.1, 3p.2 (21)	5p but not 3p.1	3p.1 but not 5p	3p.2 but not 5p	5p but not 3p.1 or 3p.2 (357)	3p.1 but not 5p or 3p.2 (507)	3p.2 but not 3p.1 or 5p (332)	5p and 3p.1 but not 3p.2 (25)	5p and 3p.2 but not 3p.1 (30)	3p.1 and 3p.2 but not 5p (112)
AARS	ABCA1	ABHD15	ABCA1	ADAM10	ABHD2	ADAM10	AARS	ABCA12	ABHD15	AARS	ABCA12	ABHD15	ABCA1	B3GNT1	ABHD2
ABCA1	ABCA12	ABHD2	AC026703.1	ANKRD52	ADAM10	ANKRD52	AC011897.1	ABHD2	ABHD2	AC011897.1	ABL1	ACER2	AC026703.1	BCL9	ADAM17
AC011897.1	ABHD2	ACER2	ADAM10	B3GNT1	ADAM17	CELF1	ACSL6	ABL1	ACER2	ACSL6	AC010327.2	ACPL2	ADAMTS5	CALU	AEN
AC026703.1	ABL1	ACPL2	ADAMTS5	BCL9	AEN	CELF2	ACTR1A	AC010327.2	ACPL2	ACTR1A	ACBD5	ACVR2B	ANKFY1	CAND1	AHCYL2
ACSL6	AC010327.2	ACVR2B	ANKFY1	CALU	AHCYL2	CISD1	ADAM9	ACBD5	ACVR2B	ADAM9	ACTA1	ADCY9	ANKRD12	CCDC85C	ALDH1A3
ACTR1A	AC026703.1	ADAM10	ANKRD12	CAND1	ALDH1A3	FGF9	ADCY6	ACTA1	ADAM17	ADCY6	ADA	AFF4	DNAJB4	CHIC2	ANGEL1
ADAM10	ACBD5	ADAM17	ANKRD52	CCDC85C	ANGEL1	IKZF3	AFTPH	ADA	ADCY9	AFTPH	ADD3	AGO2	EHD4	CREB1	APLP2
ADAM9	ACTA1	ADCY9	CELF1	CELF1	ANKRD52	LHFPL2	AKAP2	ADAM17	AEN	AKAP2	AGFG2	AGO4	IPO7	DCUN1D3	AQP10
ADAMTS5	ADA	AEN	CELF2	CELF2	APLP2	LPHN2	AKIRIN2	ADD3	AFF4	AKIRIN2	AGO1	AHDC1	IPPK	ELAVL2	ARIH1
ADCY6	ADAM10	AFF4	CISD1	CHIC2	AQP10	MTSS1	AMER1	AEN	AGO2	AMER1	AIDA	AHRR	JHDM1D	GLUL	ATF7IP
AFTPH	ADAM17	AGO2	DNAJB4	CISD1	ARIH1	NDST1	AMER2	AGFG2	AGO4	AMER2	AK4	ALX1	KIAA0247	HDAC4	ATXN7L3
AKAP2	ADAMTS5	AGO4	EHD4	CREB1	ATF7IP	PLEKHG3	ANKIB1	AGO1	AHCYL2	ANKIB1	AKAP13	ANK2	KIF1B	HMBOX1	ATXN7L3B
AKIRIN2	ADD3	AHCYL2	FGF9	DCUN1D3	ATXN7L3	POMGNT1	ANO6	AHCYL2	AHDC1	ANO6	ALDH5A1	AP2A2	MATR3	HS2ST1	BAG1
AMER1	AEN	AHDC1	IKZF3	ELAVL2	ATXN7L3B	RAP1B	AP2B1	AIDA	AHRR	AP2B1	ALG11	APOLD1	MGAT1	JAG1	BAHD1
AMER2	AGFG2	AHRR	IPO7	FGF9	BAG1	RC3H1	APPBP2	AK4	ALDH1A3	APPBP2	AMMECR1	ARHGAP35	NCKAP1	KDM5A	BSN
ANKFY1	AGO1	ALDH1A3	IPPK	GLUL	BAHD1	RFX7	AQP4	AKAP13	ALX1	AQP4	ANGEL2	ARID1B	NPR3	MAPK1	C2orf91
ANKIB1	AHCYL2	ALX1	JHDM1D	HDAC4	BSN	SATB2	ARHGAP19	ALDH1A3	ANGEL1	ARHGAP19	ANKS1B	ARID2	PRPF38A	MED13	CASD1
ANKRD12	AIDA	ANGEL1	KIAA0247	HMBOX1	C2orf91	VCPIP1	ARL15	ALDH5A1	ANK2	ARL15	AP2M1	ARL4C	RALGPS2	MIER3	CBL
ANKRD52	AK4	ANK2	KIF1B	HS2ST1	CASD1	WEE1	ATF6	ALG11	AP2A2	ATF6	AP4E1	ARMC5	RGMB	NFAT5	CHIC1
ANO6	AKAP13	ANKRD52	LHFPL2	IKZF3	CBL	WNT9A	ATG14	AMMECR1	APLP2	ATG14	ARHGAP12	ATG4B	SPRED1	NFYA	DAAM1
AP2B1	ALDH1A3	AP2A2	LPHN2	JAG1	CELF1	ZBTB20	ATP11A	ANGEL1	APOLD1	ATP11A	ARHGAP18	ATL2	TEAD1	PAFAH1B2	DACH1
APPBP2	ALDH5A1	APLP2	MATR3	KDM5A	CELF2		B3GNT1	ANGEL2	AQP10	BACH1	ARHGAP5	ATP1B1	TMEM120B	PVRL3	DAND5
AQP4	ALG11	APOLD1	MGAT1	LHFPL2	CHIC1		BACH1	ANKS1B	ARHGAP35	BAG2	ARID5B	ATP2A2	TMEM260	RPS6KA3	DCUN1D1
ARHGAP19	AMMECR1	AQP10	MTSS1	LPHN2	CISD1		BAG2	AP2M1	ARID1B	BAZ2B	ARIH2	ATP2B2	TRIM44	SMARCC2	DDN
ARL15	ANGEL1	ARHGAP35	NCKAP1	MAPK1	DAAM1		BAZ2B	AP4E1	ARID2	BCL2L1	ARNT2	B3GALNT1	VEGFA	SMCR8	DDX11
ATF6	ANGEL2	ARID1B	NDST1	MED13	DACH1		BCL2L1	APLP2	ARIH1	BCL2L2	ARRB1	B3GALNT2		SOX4	DDX5
ATG14	ANKFY1	ARID2	NPR3	MIER3	DAND5		BCL2L2	AQP10	ARL4C	BICC1	ASB6	BACE1		SP4	DRP2
ATP11A	ANKRD12	ARIH1	PLEKHG3	MTSS1	DCUN1D1		BCL9	ARHGAP12	ARMC5	BIRC6	ASCC1	BAK1		SPRY4	DYNLL2
B3GNT1	ANKRD52	ARL4C	POMGNT1	NDST1	DDN		BICC1	ARHGAP18	ATF7IP	BMP2	ATL3	BCL2		TTYH3	EIF5A2
BACH1	ANKS1B	ARMC5	PRPF38A	NFAT5	DDX11		BIRC6	ARHGAP5	ATG4B	BMP2K	ATP1B2	BCL9L		YWHAG	FAM199X
BAG2	AP2M1	ATF7IP	RALGPS2	NFYA	DDX5		BMP2	ARID5B	ATL2	C1R	ATP2B1	BDNF			FBXO21
BAZ2B	AP4E1	ATG4B	RAP1B	PAFAH1B2	DRP2		BMP2K	ARIH1	ATP1B1	C20orf144	ATP2B4	BRWD3			FBXO33
BCL2L1	APLP2	ATL2	RC3H1	PLEKHG3	DYNLL2		C1R	ARIH2	ATP2A2	C6orf47	ATP9A	BTG1			FBXO44
BCL2L2	AQP10	ATP1B1	RFX7	POMGNT1	EIF5A2		C20orf144	ARNT2	ATP2B2	CACNA1C	B4GALT4	C16orf52			GABRB2
BCL9	ARHGAP12	ATP2A2	RGMB	PVRL3	FAM199X		C6orf47	ARRB1	ATXN7L3	CADM3	BAI2	C3orf83			GAN
BICC1	ARHGAP18	ATP2B2	SATB2	RAP1B	FBXO21		CACNA1C	ASB6	ATXN7L3B	CALCOCO2	BAP1	CABLES2			GRHL2
BIRC6	ARHGAP5	ATXN7L3	SPRED1	RC3H1	FBXO33		CADM3	ASCC1	B3GALNT1	CAMK2N1	BCL2L2-PABPN1	CACUL1			GRM2
BMP2	ARID5B	ATXN7L3B	TEAD1	RFX7	FBXO44		CALCOCO2	ATF7IP	B3GALNT2	CAPN1	BHLHE40	CAPRIN1			HBP1
BMP2K	ARIH1	B3GALNT1	TMEM120B	RPS6KA3	FGF9		CALU	ATL3	BACE1	CCNYL1	BRPF3	CAPZB			HGF
C1R	ARIH2	B3GALNT2	TMEM260	SATB2	GABRB2		CAMK2N1	ATP1B2	BAG1	CDH11	BTBD7	CCAR2			HIC1
C20orf144	ARNT2	B3GNT1	TRIM44	SMARCC2	GAN		CAND1	ATP2B1	BAHD1	CDK17	C11orf30	CCDC179			HNRNPA1
C6orf47	ARRB1	BACE1	VCPIP1	SMCR8	GRHL2		CAPN1	ATP2B4	BAK1	CDK8	C11orf84	CCNT2			HNRNPUL2
CACNA1C	ASB6	BAG1	VEGFA	SOX4	GRM2		CCDC85C	ATP9A	BCL2	CDYL	C17orf49	CD274			IRGQ
CADM3	ASCC1	BAHD1	WEE1	SP4	HBP1		CCNYL1	ATXN7L3	BCL9L	CEP63	C17orf75	CDC42EP3			KANSL1
CALCOCO2	ATF7IP	BAK1	WNT9A	SPRY4	HGF		CDH11	ATXN7L3B	BDNF	CERCAM	C19orf26	CDC5L			KAT7
CALU	ATL3	BCL2	ZBTB20	TTYH3	HIC1		CDK17	B4GALT4	BRWD3	CHRM3	C1GALT1	CDC7			KCNK17
CAMK2N1	ATP1B2	BCL9		VCPIP1	HNRNPA1		CDK8	BAG1	BSN	CLIC2	C5orf30	CDH18			KCTD6
CAND1	ATP2B1	BCL9L		WEE1	HNRNPUL2		CDYL	BAHD1	BTG1	CLSTN2	C6orf106	CDK6			KHDRBS2
CAPN1	ATP2B4	BDNF		WNT9A	IKZF3		CEP63	BAI2	C16orf52	CORO2A	C9orf114	CELSR3			KIF2A
CCDC85C	ATP9A	BRWD3		YWHAG	IRGQ		CERCAM	BAP1	C2orf91	CREB3L1	C9orf156	CENPC			KIF5A
CCNYL1	ATXN7L3	BSN		ZBTB20	KANSL1		CHIC2	BCL2L2-PABPN1	C3orf83	CRTC3	CABLES1	CHD7			LARP1
CDH11	ATXN7L3B	BTG1			KAT7		CHRM3	BHLHE40	CABLES2	CTCF	CABP7	CHL1			LDLRAD4
CDK17	B4GALT4	C16orf52			KCNK17		CLIC2	BRPF3	CACUL1	CTSV	CACNA1E	CMTR1			MAFG
CDK8	BAG1	C2orf91			KCTD6		CLSTN2	BSN	CAPRIN1	CTTNBP2	CADM2	CNEP1R1			MAP2K6
CDYL	BAHD1	C3orf83			KHDRBS2		CORO2A	BTBD7	CAPZB	CUL3	CAMK2G	CPE			MEIS2
CELF1	BAI2	CABLES2			KIF2A		CREB1	C11orf30	CASD1	CYTH2	CAMKK1	CPEB1			MLLT3
CELF2	BAP1	CACUL1			KIF5A		CREB3L1	C11orf84	CBL	DAG1	CAMKV	CTBP1			MMRN2
CEP63	BCL2L2-PABPN1	CALU			LARP1		CRTC3	C17orf49	CCAR2	DGKH	CAP1	CXADR			NCAN
CERCAM	BHLHE40	CAND1			LDLRAD4		CTCF	C17orf75	CCDC179	DKFZP434H0512	CAPRIN2	CYTH3			NCL
CHIC2	BRPF3	CAPRIN1			LHFPL2		CTSV	C19orf26	CCNT2	DNAH10OS	CASC3	DAZAP2			NOVA1
CHRM3	BSN	CAPZB			LPHN2		CTTNBP2	C1GALT1	CD274	DNM3	CCDC103	DDX52			NSL1
CISD1	BTBD7	CASD1			MAFG		CUL3	C2orf91	CDC42EP3	DOK4	CCDC144A	DENND6A			PACSIN1
CLIC2	C11orf30	CBL			MAP2K6		CYTH2	C5orf30	CDC5L	DPP10	CCDC74A	DGKE			PCDH10
CLSTN2	C11orf84	CCAR2			MEIS2		DAG1	C6orf106	CDC7	DPYSL2	CCDC97	DGKG			PDE3A
CORO2A	C17orf49	CCDC179			MLLT3		DCUN1D3	C9orf114	CDH18	DTNA	CCER1	DNM1			PEAK1
CREB1	C17orf75	CCDC85C			MMRN2		DGKH	C9orf156	CDK6	DYNC1LI2	CCNT1	DOCK9			PGBD5
CREB3L1	C19orf26	CCNT2			MTSS1		DKFZP434H0512	CABLES1	CELSR3	EAF1	CCS	DTX4			PI4KB
CRTC3	C1GALT1	CD274			NCAN		DNAH10OS	CABP7	CENPC	EGR2	CDH8	E2F7			PIK3CA
CTCF	C2orf91	CDC42EP3			NCL		DNM3	CACNA1E	CHD7	EIF2AK2	CDKN2AIP	EGLN3			PLXNC1
CTSV	C5orf30	CDC5L			NDST1		DOK4	CADM2	CHIC1	EIF4G2	CEP170	EN2			PTCH1
CTTNBP2	C6orf106	CDC7			NOVA1		DPP10	CAMK2G	CHL1	ENTPD5	CERS6	EPHA4			PTCHD1
CUL3	C9orf114	CDH18			NSL1		DPYSL2	CAMKK1	CMTR1	EPB41L2	CHD8	EPOR			RAB21
CYTH2	C9orf156	CDK6			PACSIN1		DTNA	CAMKV	CNEP1R1	ERBB2IP	CHST14	ERLIN2			RAB30
DAG1	CABLES1	CELF1			PCDH10		DYNC1LI2	CAP1	CPE	ERBB4	CIC	FAF2			RELT
DCUN1D3	CABP7	CELF2			PDE3A		EAF1	CAPRIN2	CPEB1	ERC2	CISD3	FAIM			RNF44
DGKH	CACNA1E	CELSR3			PEAK1		EGR2	CASC3	CTBP1	ERLEC1	CLEC16A	FAM105B			RUSC1
DKFZP434H0512	CADM2	CENPC			PGBD5		EIF2AK2	CASD1	CXADR	EXTL1	CLMN	FAM179B			SAMD8
DNAH10OS	CAMK2G	CHD7			PI4KB		EIF4G2	CBL	CYTH3	FADS1	CLOCK	FAM19A1			SCN1A
DNAJB4	CAMKK1	CHIC1			PIK3CA		ELAVL2	CCDC103	DAAM1	FAM102A	CLTC	FANCA			SCN3A
DNM3	CAMKV	CHIC2			PLEKHG3		ENTPD5	CCDC144A	DACH1	FAM105A	CNPY3	FBXL20			SIRPA
DOK4	CAP1	CHL1			PLXNC1		EPB41L2	CCDC74A	DAND5	FAM175B	COA5	FBXW7			SIRT1
DPP10	CAPRIN2	CISD1			POMGNT1		ERBB2IP	CCDC97	DAZAP2	FAM178A	COL23A1	FCRLB			SLC30A3
DPYSL2	CASC3	CMTR1			PTCH1		ERBB4	CCER1	DCUN1D1	FAM211A	COL4A1	FGF12			SMUG1
DTNA	CASD1	CNEP1R1			PTCHD1		ERC2	CCNT1	DDN	FAM214A	COL7A1	FHL5			SNAP25
DYNC1LI2	CBL	CPE			RAB21		ERLEC1	CCS	DDX11	FAM46A	COLQ	FOXG1			SOX12
EAF1	CCDC103	CPEB1			RAB30		EXTL1	CDH8	DDX5	FBN1	CPEB2	FOXP1			SSR3
EGR2	CCDC144A	CREB1			RAP1B		FADS1	CDKN2AIP	DDX52	FBN2	CPSF6	FRRS1			SYN1
EHD4	CCDC74A	CTBP1			RC3H1		FAM102A	CEP170	DENND6A	FBXL4	CREBZF	FUT11			SYNC
EIF2AK2	CCDC97	CXADR			RELT		FAM105A	CERS6	DGKE	FBXO45	CRK	FXYD6			TAF1D
EIF4G2	CCER1	CYTH3			RFX7		FAM175B	CHD8	DGKG	FCHO2	CRKL	G6PC2			TENM1
ELAVL2	CCNT1	DAAM1			RNF44		FAM178A	CHIC1	DNM1	FECH	CSE1L	GAB1			TLE4
ENTPD5	CCS	DACH1			RUSC1		FAM211A	CHST14	DOCK9	FEN1	CSNK2B-LY6G5B-1181	GAB2			TMEM178B
EPB41L2	CDH8	DAND5			SAMD8		FAM214A	CIC	DRP2	FES	CTBP2	GAD2			TNIK
ERBB2IP	CDKN2AIP	DAZAP2			SATB2		FAM46A	CISD3	DTX4	FKBP4	CTDSPL2	GDPD5			TPRG1
ERBB4	CELF1	DCUN1D1			SCN1A		FBN1	CLEC16A	DYNLL2	FLJ00104	CTNNBL1	GLG1			TRPS1
ERC2	CELF2	DCUN1D3			SCN3A		FBN2	CLMN	E2F7	FLRT2	CTSW	GMFB			TTC39C
ERLEC1	CEP170	DDN			SIRPA		FBXL4	CLOCK	EGLN3	FNDC5	CUL2	GOPC			TYRO3
EXTL1	CERS6	DDX11			SIRT1		FBXO45	CLTC	EIF5A2	FOXN2	CXCR4	GPCPD1			UBP1
FADS1	CHD8	DDX5			SLC30A3		FCHO2	CNPY3	EN2	FOXP2	CXCR5	GPN2			UCK2
FAM102A	CHIC1	DDX52			SMUG1		FECH	COA5	EPHA4	FRAS1	CYB561	GPR12			USP1
FAM105A	CHST14	DENND6A			SNAP25		FEN1	COL23A1	EPOR	FUT1	CYLC1	GPR158			USP34
FAM175B	CIC	DGKE			SOX12		FES	COL4A1	ERLIN2	FXR1	CYLD	GSG1L			USP9X
FAM178A	CISD1	DGKG			SSR3		FKBP4	COL7A1	FAF2	FYCO1	DAB2	HDC			VGLL2
FAM211A	CISD3	DNM1			SYN1		FLJ00104	COLQ	FAIM	GALNT16	DAZ4	HIF1AN			VKORC1L1
FAM214A	CLEC16A	DOCK9			SYNC		FLRT2	CPEB2	FAM105B	GIT1	DBNL	HIPK3			VSX2
FAM46A	CLMN	DRP2			TAF1D		FNDC5	CPSF6	FAM179B	GLI3	DBP	HLF			WDFY2
FBN1	CLOCK	DTX4			TENM1		FOXN2	CREBZF	FAM199X	GLIPR1	DCP2	HMGN3			WDR91
FBN2	CLTC	DYNLL2			TLE4		FOXP2	CRK	FAM19A1	GLRX5	DCTN5	HMGXB4			YWHAZ
FBXL4	CNPY3	E2F7			TMEM178B		FRAS1	CRKL	FANCA	GNG12	DDA1	HNRNPA3			ZC3H4
FBXO45	COA5	EGLN3			TNIK		FUT1	CSE1L	FBXL20	GPD1L	DDI2	HOXA9			ZC3H6
FCHO2	COL23A1	EIF5A2			TPRG1		FXR1	CSNK2B-LY6G5B-1181	FBXO21	GPR107	DDX19B	HOXB5			ZNF131
FECH	COL4A1	ELAVL2			TRPS1		FYCO1	CTBP2	FBXO33	GPR161	DDX27	HPCAL1			ZNF207
FEN1	COL7A1	EN2			TTC39C		GALNT16	CTDSPL2	FBXO44	GPR85	DDX42	HPCAL4
FES	COLQ	EPHA4			TYRO3		GIT1	CTNNBL1	FBXW7	GPRIN3	DEF6	HR
FGF9	CPEB2	EPOR			UBP1		GLI3	CTSW	FCRLB	GUCD1	DENND4C	HS3ST5
FKBP4	CPSF6	ERLIN2			UCK2		GLIPR1	CUL2	FGF12	HAND2	DEPDC5	HS6ST2
FLJ00104	CREBZF	FAF2			USP1		GLRX5	CXCR4	FHL5	HDAC7	DESI1	HSPG2
FLRT2	CRK	FAIM			USP34		GLUL	CXCR5	FOXG1	HDGFRP3	DIP2B	IFRD1
FNDC5	CRKL	FAM105B			USP9X		GNG12	CYB561	FOXP1	HEG1	DLGAP3	IL21R
FOXN2	CSE1L	FAM179B			VCPIP1		GPD1L	CYLC1	FRRS1	HEY1	DLX5	INO80
FOXP2	CSNK2B-LY6G5B-1181	FAM199X			VGLL2		GPR107	CYLD	FUT11	HIAT1	DNAJB1	INO80D
FRAS1	CTBP2	FAM19A1			VKORC1L1		GPR161	DAAM1	FXYD6	HMGN5	DNAJC5	IP6K1
FUT1	CTDSPL2	FANCA			VSX2		GPR85	DAB2	G6PC2	HNRNPH3	DNM1L	IQCJ-SCHIP1
FXR1	CTNNBL1	FBXL20			WDFY2		GPRIN3	DACH1	GAB1	HSPA13	DONSON	ITK
FYCO1	CTSW	FBXO21			WDR91		GUCD1	DAND5	GAB2	HSPA4L	DUSP2	KCMF1
GALNT16	CUL2	FBXO33			WEE1		HAND2	DAZ4	GABRB2	IFFO2	DYRK1A	KCNB1
GIT1	CXCR4	FBXO44			WNT9A		HDAC4	DBNL	GAD2	IGF1R	E2F3	KHDRBS3
GLI3	CXCR5	FBXW7			YWHAZ		HDAC7	DBP	GAN	IGFBP5	ECE1	KIAA0141
GLIPR1	CYB561	FCRLB			ZBTB20		HDGFRP3	DCP2	GDPD5	IGSF3	EDEM1	KIAA0232
GLRX5	CYLC1	FGF12			ZC3H4		HEG1	DCTN5	GLG1	IL1RAPL1	EIF4EBP2	KIAA1147
GLUL	CYLD	FGF9			ZC3H6		HEY1	DCUN1D1	GMFB	IMPG1	ELAVL3	KIAA1468
GNG12	DAAM1	FHL5			ZNF131		HIAT1	DDA1	GOPC	JMJD7-PLA2G4B	ELK4	KIAA2022
GPD1L	DAB2	FOXG1			ZNF207		HMBOX1	DDI2	GPCPD1	KAT2B	ELL	KIF1C
GPR107	DACH1	FOXP1					HMGN5	DDN	GPN2	KATNBL1	ELMO1	KLF4
GPR161	DAND5	FRRS1					HNRNPH3	DDX11	GPR12	KBTBD2	ELMSAN1	KLF5
GPR85	DAZ4	FUT11					HS2ST1	DDX19B	GPR158	KCND3	ELOVL1	KPNA1
GPRIN3	DBNL	FXYD6					HSPA13	DDX27	GRHL2	KIAA0753	ELOVL5	KPNA4
GUCD1	DBP	G6PC2					HSPA4L	DDX42	GRM2	KIAA1199	EMC8	KPNB1
HAND2	DCP2	GAB1					IFFO2	DDX5	GSG1L	KIAA1432	ENAH	KRT2
HDAC4	DCTN5	GAB2					IGF1R	DEF6	HBP1	KLF6	EPC1	LATS2
HDAC7	DCUN1D1	GABRB2					IGFBP5	DENND4C	HDC	KLF9	EPC2	LPP
HDGFRP3	DDA1	GAD2					IGSF3	DEPDC5	HGF	KLHL5	EPT1	LRRC4C
HEG1	DDI2	GAN					IL1RAPL1	DESI1	HIC1	KLK10	EXOSC7	LSM11
HEY1	DDN	GDPD5					IMPG1	DIP2B	HIF1AN	LAMC1	EYA4	LUZP1
HIAT1	DDX11	GLG1					JAG1	DLGAP3	HIPK3	LAMP2	EZH1	LYG2
HMBOX1	DDX19B	GLUL					JMJD7-PLA2G4B	DLX5	HLF	LANCL3	FAM110D	MAGIX
HMGN5	DDX27	GMFB					KAT2B	DNAJB1	HMGN3	LCOR	FAM127B	MAP1LC3A
HNRNPH3	DDX42	GOPC					KATNBL1	DNAJC5	HMGXB4	LDLR	FAM174B	MAPRE3
HS2ST1	DDX5	GPCPD1					KBTBD2	DNM1L	HNRNPA1	LHX2	FAM222B	MARCKS
HSPA13	DEF6	GPN2					KCND3	DONSON	HNRNPA3	LHX9	FAM46C	MCTS1
HSPA4L	DENND4C	GPR12					KDM5A	DRP2	HNRNPUL2	LMAN1	FAM53B	MECP2
IFFO2	DEPDC5	GPR158					KIAA0753	DUSP2	HOXA9	LMNB1	FAM78B	MED12L
IGF1R	DESI1	GRHL2					KIAA1199	DYNLL2	HOXB5	LRAT	FAM83D	MELK
IGFBP5	DIP2B	GRM2					KIAA1432	DYRK1A	HPCAL1	LRP4	FBXO42	MEMO1
IGSF3	DLGAP3	GSG1L					KLF6	E2F3	HPCAL4	LSM14B	FBXW11	METAP2
IKZF3	DLX5	HBP1					KLF9	ECE1	HR	LYSMD3	FCGRT	MINA
IL1RAPL1	DNAJB1	HDAC4					KLHL5	EDEM1	HS3ST5	MAGI2	FGD5	MMP16
IMPG1	DNAJB4	HDC					KLK10	EIF4EBP2	HS6ST2	MAPK4	FGF13	MOCS2
IPO7	DNAJC5	HGF					LAMC1	EIF5A2	HSPG2	MARK1	FHDC1	MPZL1
IPPK	DNM1L	HIC1					LAMP2	ELAVL3	IFRD1	MECOM	FMNL3	MRFAP1
JAG1	DONSON	HIF1AN					LANCL3	ELK4	IL21R	MED28	FN1	MSH3
JHDM1D	DRP2	HIPK3					LCOR	ELL	INO80	METTL8	FPGS	MSH6
JMJD7-PLA2G4B	DUSP2	HLF					LDLR	ELMO1	INO80D	MFHAS1	FRMPD3	MSI2
KAT2B	DYNLL2	HMBOX1					LHX2	ELMSAN1	IP6K1	MICAL3	FRS2	MVB12B
KATNBL1	DYRK1A	HMGN3					LHX9	ELOVL1	IQCJ-SCHIP1	MID2	FUBP3	MYB
KBTBD2	E2F3	HMGXB4					LMAN1	ELOVL5	IRGQ	MINPP1	FURIN	MYLK4
KCND3	ECE1	HNRNPA1					LMNB1	EMC8	ITK	MIPOL1	FZD2	NAA50
KDM5A	EDEM1	HNRNPA3					LRAT	ENAH	KANSL1	MLIP	G3BP2	NDC1
KIAA0247	EHD4	HNRNPUL2					LRP4	EPC1	KAT7	MMD	GABRB1	NFATC4
KIAA0753	EIF4EBP2	HOXA9					LSM14B	EPC2	KCMF1	MNS1	GADD45G	NKAIN2
KIAA1199	EIF5A2	HOXB5					LYSMD3	EPT1	KCNB1	MOB1B	GATA6	NKAP
KIAA1432	ELAVL3	HPCAL1					MAGI2	EXOSC7	KCNK17	MOB3A	GBA	NKRF
KIF1B	ELK4	HPCAL4					MAPK1	EYA4	KCTD6	MPP2	GHR	NNAT
KLF6	ELL	HR					MAPK4	EZH1	KHDRBS2	MSMP	GINS2	NOMO1
KLF9	ELMO1	HS2ST1					MARK1	FAM110D	KHDRBS3	MYCBP2	GK	NOMO3
KLHL5	ELMSAN1	HS3ST5					MECOM	FAM127B	KIAA0141	MYH9	GLT8D1	NR1I2
KLK10	ELOVL1	HS6ST2					MED13	FAM174B	KIAA0232	MYO10	GLYCTK	NR2F2
LAMC1	ELOVL5	HSPG2					MED28	FAM199X	KIAA1147	NAA20	GOLPH3L	NREP
LAMP2	EMC8	IFRD1					METTL8	FAM222B	KIAA1468	NAALADL2	GPR112	NRG3
LANCL3	ENAH	IKZF3					MFHAS1	FAM46C	KIAA2022	NCOA1	GREB1L	NRIP1
LCOR	EPC1	IL21R					MICAL3	FAM53B	KIF1C	NCS1	GRIA1	NSF
LDLR	EPC2	INO80					MID2	FAM78B	KIF2A	NCSTN	GRIA4	NUP153
LHFPL2	EPT1	INO80D					MIER3	FAM83D	KIF5A	NDRG3	GRID2	NUP188
LHX2	EXOSC7	IP6K1					MINPP1	FBXO21	KLF4	NFE2L2	GRIK2	NXN
LHX9	EYA4	IQCJ-SCHIP1					MIPOL1	FBXO33	KLF5	NIPA1	GRIN3A	OGFRL1
LMAN1	EZH1	IRGQ					MLIP	FBXO42	KPNA1	NLK	GRM4	OLA1
LMNB1	FAM110D	ITK					MMD	FBXO44	KPNA4	NOG	GRN	ONECUT2
LPHN2	FAM127B	JAG1					MNS1	FBXW11	KPNB1	NPL	GSK3B	ORC6
LRAT	FAM174B	KANSL1					MOB1B	FCGRT	KRT2	NT5C1A	GSTM3	OTUD7B
LRP4	FAM199X	KAT7					MOB3A	FGD5	LARP1	NUCKS1	GTDC1	OTX2
LSM14B	FAM222B	KCMF1					MPP2	FGF13	LATS2	NUFIP2	GXYLT1	P2RY2
LYSMD3	FAM46C	KCNB1					MSMP	FHDC1	LDLRAD4	NUMBL	HAP1	PAG1
MAGI2	FAM53B	KCNK17					MYCBP2	FMNL3	LPP	OGT	HCFC1	PAK2
MAPK1	FAM78B	KCTD6					MYH9	FN1	LRRC4C	OSBPL6	HELLS	PAPD7
MAPK4	FAM83D	KDM5A					MYO10	FPGS	LSM11	OSTM1	HHIP	PAPSS2
MARK1	FBXO21	KHDRBS2					NAA20	FRMPD3	LUZP1	PABPC1L2A	HIF1A	PARP2
MATR3	FBXO33	KHDRBS3					NAALADL2	FRS2	LYG2	PABPC1L2B	HMG20A	PCDH11Y
MECOM	FBXO42	KIAA0141					NCOA1	FUBP3	MAFG	PAK4	HMGB3	PCDH17
MED13	FBXO44	KIAA0232					NCS1	FURIN	MAGIX	PALM2-AKAP2	HMGCR	PCDH7
MED28	FBXW11	KIAA1147					NCSTN	FZD2	MAP1LC3A	PANK3	HMGCS1	PCDH8
METTL8	FCGRT	KIAA1468					NDRG3	G3BP2	MAP2K6	PARD6B	HNRNPA0	PCGF5
MFHAS1	FGD5	KIAA2022					NFAT5	GABRB1	MAPRE3	PAX5	HNRNPA2B1	PHF12
MGAT1	FGF13	KIF1C					NFE2L2	GABRB2	MARCKS	PAX6	HNRNPAB	PIAS2
MICAL3	FGF9	KIF2A					NFYA	GADD45G	MCTS1	PAX9	HNRNPDL	PIP4K2B
MID2	FHDC1	KIF5A					NIPA1	GAN	MECP2	PBRM1	HNRNPK	PITPNM3
MIER3	FMNL3	KLF4					NLK	GATA6	MED12L	PDE7A	HOOK1	PKD2
MINPP1	FN1	KLF5					NOG	GBA	MEIS2	PDGFRA	HOXA11	PPAP2B
MIPOL1	FPGS	KPNA1					NPL	GHR	MELK	PFN2	HP1BP3	PPIL1
MLIP	FRMPD3	KPNA4					NT5C1A	GINS2	MEMO1	PGAP3	HS3ST2	PPM1A
MMD	FRS2	KPNB1					NUCKS1	GK	METAP2	PGP	HSF2	PPP1CB
MNS1	FUBP3	KRT2					NUFIP2	GLT8D1	MINA	PHACTR2	HSPD1	PRCP
MOB1B	FURIN	LARP1					NUMBL	GLYCTK	MLLT3	PHF6	HSPH1	PRKG1
MOB3A	FZD2	LATS2					OGT	GOLPH3L	MMP16	PIN1	IL17RD	PROX1
MPP2	G3BP2	LDLRAD4					OSBPL6	GPR112	MMRN2	PITX2	IL17RE	PRSS42
MSMP	GABRB1	LHFPL2					OSTM1	GREB1L	MOCS2	PLD2	IL6ST	PTEN
MTSS1	GABRB2	LPHN2					PABPC1L2A	GRHL2	MPZL1	PLOD1	ILKAP	PTPN1
MYCBP2	GADD45G	LPP					PABPC1L2B	GRIA1	MRFAP1	POGK	ING1	PTPN3
MYH9	GAN	LRRC4C					PAFAH1B2	GRIA4	MSH3	POLR3H	IRF2	PURA
MYO10	GATA6	LSM11					PAK4	GRID2	MSH6	PPARGC1A	IRF6	PYGO1
NAA20	GBA	LUZP1					PALM2-AKAP2	GRIK2	MSI2	PPP1CC	ISCA2	RAB27B
NAALADL2	GHR	LYG2					PANK3	GRIN3A	MVB12B	PPP1R12A	ITGA10	RAB2A
NCKAP1	GINS2	MAFG					PARD6B	GRM2	MYB	PPP1R9A	ITGA6	RAB8B
NCOA1	GK	MAGIX					PAX5	GRM4	MYLK4	PPTC7	ITSN1	RARB
NCS1	GLT8D1	MAP1LC3A					PAX6	GRN	NAA50	PROX2	JAK1	RASA2
NCSTN	GLYCTK	MAP2K6					PAX9	GSK3B	NCAN	PRR14L	KCNC3	RASGEF1B
NDRG3	GOLPH3L	MAPK1					PBRM1	GSTM3	NCL	PRRG1	KCNC4	RASSF6
NDST1	GPR112	MAPRE3					PDE7A	GTDC1	NDC1	PSMF1	KCNJ9	RBFOX2
NFAT5	GREB1L	MARCKS					PDGFRA	GXYLT1	NFATC4	PSRC1	KCNK10	RBMS1
NFE2L2	GRHL2	MCTS1					PFN2	HAP1	NKAIN2	PTBP3	KCTD15	REEP5
NFYA	GRIA1	MECP2					PGAP3	HBP1	NKAP	PTP4A3	KCTD16	REL
NIPA1	GRIA4	MED12L					PGP	HCFC1	NKRF	PURB	KDM2A	RFT1
NLK	GRID2	MED13					PHACTR2	HELLS	NNAT	PXMP4	KDM3A	RFX1
NOG	GRIK2	MEIS2					PHF6	HGF	NOMO1	RAB10	KIAA0195	RHOA
NPL	GRIN3A	MELK					PIN1	HHIP	NOMO3	RAB11A	KIAA0226L	RNF115
NPR3	GRM2	MEMO1					PITX2	HIC1	NOVA1	RABIF	KIAA0355	RNF152
NT5C1A	GRM4	METAP2					PLD2	HIF1A	NR1I2	RAD1	KIAA1549	RNF7
NUCKS1	GRN	MIER3					PLOD1	HMG20A	NR2F2	RAD51L3-RFFL	KIAA1549L	ROBO2
NUFIP2	GSK3B	MINA					POGK	HMGB3	NREP	RAD54L2	KIAA2013	RP11-160N1.10
NUMBL	GSTM3	MLLT3					POLR3H	HMGCR	NRG3	RALA	KIF5B	RP11-650K20.3
OGT	GTDC1	MMP16					PPARGC1A	HMGCS1	NRIP1	RALGPS1	KLF2	RP1-170O19.20
OSBPL6	GXYLT1	MMRN2					PPP1CC	HNRNPA0	NSF	RAN	KPNA3	RPL11
OSTM1	HAP1	MOCS2					PPP1R12A	HNRNPA1	NSL1	RAP2B	LAMC3	RRAGC
PABPC1L2A	HBP1	MPZL1					PPP1R9A	HNRNPA2B1	NUP153	RASSF2	LFNG	RRAS2
PABPC1L2B	HCFC1	MRFAP1					PPTC7	HNRNPAB	NUP188	RBM39	LIF	RTN3
PAFAH1B2	HELLS	MSH3					PROX2	HNRNPDL	NXN	REST	LIMK2	RUNX1T1
PAK4	HGF	MSH6					PRR14L	HNRNPK	OGFRL1	RFFL	LIPA	SAR1A
PALM2-AKAP2	HHIP	MSI2					PRRG1	HNRNPUL2	OLA1	RIC8B	LMTK2	SCHIP1
PANK3	HIC1	MTSS1					PSMF1	HOOK1	ONECUT2	RLIM	LONRF3	SDC4
PARD6B	HIF1A	MVB12B					PSRC1	HOXA11	ORC6	RNF169	LPAR2	SGIP1
PAX5	HMG20A	MYB					PTBP3	HP1BP3	OTUD7B	RNF19A	LPHN1	SIK2
PAX6	HMGB3	MYLK4					PTP4A3	HS3ST2	OTX2	ROR1	LRIG1	SKIL
PAX9	HMGCR	NAA50					PURB	HSF2	P2RY2	RPS6KA6	LRP6	SLAIN2
PBRM1	HMGCS1	NCAN					PVRL3	HSPD1	PACSIN1	S1PR1	LRRC59	SLC10A4
PDE7A	HNRNPA0	NCL					PXMP4	HSPH1	PAG1	SAP30	LRRFIP1	SLC25A36
PDGFRA	HNRNPA1	NDC1					RAB10	IL17RD	PAK2	SBF1	LTBP1	SLC35B2
PFN2	HNRNPA2B1	NDST1					RAB11A	IL17RE	PAPD7	SBNO1	MANEA	SLC35F1
PGAP3	HNRNPAB	NFAT5					RABIF	IL6ST	PAPSS2	SCRN1	MAP3K3	SLC5A1
PGP	HNRNPDL	NFATC4					RAD1	ILKAP	PARP2	SEC22C	MAPK8	SLC5A3
PHACTR2	HNRNPK	NFYA					RAD51L3-RFFL	ING1	PCDH10	SEL1L	MARCKSL1	SLC6A9
PHF6	HNRNPUL2	NKAIN2					RAD54L2	IRF2	PCDH11Y	SENP5	MBD6	SLC7A1
PIN1	HOOK1	NKAP					RALA	IRF6	PCDH17	SERPINC1	MBNL3	SLTM
PITX2	HOXA11	NKRF					RALGPS1	IRGQ	PCDH7	SH3D19	MEF2C	SMARCA2
PLD2	HP1BP3	NNAT					RAN	ISCA2	PCDH8	SHF	MET	SMARCC1
PLEKHG3	HS3ST2	NOMO1					RAP2B	ITGA10	PCGF5	SHROOM3	MFAP2	SMIM13
PLOD1	HSF2	NOMO3					RASSF2	ITGA6	PDE3A	SIAH1	MGAT3	SOBP
POGK	HSPD1	NOVA1					RBM39	ITSN1	PEAK1	SLAIN1	MIA3	SOCS4
POLR3H	HSPH1	NR1I2					REST	JAK1	PGBD5	SLC29A4	MINOS1-NBL1	SON
POMGNT1	IKZF3	NR2F2					RFFL	KANSL1	PHF12	SLC2A1	MOB3B	SOS1
PPARGC1A	IL17RD	NREP					RIC8B	KAT7	PI4KB	SLC30A5	MOBP	SP3
PPP1CC	IL17RE	NRG3					RLIM	KCNC3	PIAS2	SLC38A2	MRC2	SPPL3
PPP1R12A	IL6ST	NRIP1					RNF169	KCNC4	PIK3CA	SLC39A9	MRPL48	SPRED2
PPP1R9A	ILKAP	NSF					RNF19A	KCNJ9	PIP4K2B	SLC41A2	MRPS23	SREK1
PPTC7	ING1	NSL1					ROR1	KCNK10	PITPNM3	SLC44A2	MSH5	SRGAP1
PROX2	IPO7	NUP153					RPS6KA3	KCNK17	PKD2	SLC6A6	MTPN	SRGAP3
PRPF38A	IPPK	NUP188					RPS6KA6	KCTD15	PLXNC1	SLMAP	MTRNR2L5	SRPX2
PRR14L	IRF2	NXN					S1PR1	KCTD16	PPAP2B	SMAD2	MXI1	SRSF10
PRRG1	IRF6	OGFRL1					SAP30	KCTD6	PPIL1	SMOC2	MYO5B	SSR2
PSMF1	IRGQ	OLA1					SBF1	KDM2A	PPM1A	SMURF1	MYPN	STAG2
PSRC1	ISCA2	ONECUT2					SBNO1	KDM3A	PPP1CB	SNTB2	MYT1L	SUV420H1
PTBP3	ITGA10	ORC6					SCRN1	KHDRBS2	PRCP	SNX12	NAALADL1	SUZ12
PTP4A3	ITGA6	OTUD7B					SEC22C	KIAA0195	PRKG1	SNX2	NAGA	TAB2
PURB	ITSN1	OTX2					SEL1L	KIAA0226L	PROX1	SNX27	NAV3	TADA3
PVRL3	JAK1	P2RY2					SENP5	KIAA0355	PRSS42	SOCS7	NBL1	TAF2
PXMP4	JHDM1D	PACSIN1					SERPINC1	KIAA1549	PTCH1	SORCS1	NCOA5	TBC1D25
RAB10	KANSL1	PAFAH1B2					SH3D19	KIAA1549L	PTCHD1	SPRY1	NCOA7	TCEB3
RAB11A	KAT7	PAG1					SHF	KIAA2013	PTEN	SRCAP	NDST2	TET2
RABIF	KCNC3	PAK2					SHROOM3	KIF2A	PTPN1	ST5	NDST3	TET3
RAD1	KCNC4	PAPD7					SIAH1	KIF5A	PTPN3	STC2	NF1	TGFA
RAD51L3-RFFL	KCNJ9	PAPSS2					SLAIN1	KIF5B	PURA	STK3	NFIB	TGIF2
RAD54L2	KCNK10	PARP2					SLC29A4	KLF2	PYGO1	STOX2	NHLH2	TIFAB
RALA	KCNK17	PCDH10					SLC2A1	KPNA3	RAB21	STRADB	NID1	TLL2
RALGPS1	KCTD15	PCDH11Y					SLC30A5	LAMC3	RAB27B	STRN	NME1	TMEFF2
RALGPS2	KCTD16	PCDH17					SLC38A2	LARP1	RAB2A	SULF1	NOL4	TMSB15B
RAN	KCTD6	PCDH7					SLC39A9	LDLRAD4	RAB30	SULF2	NPFFR2	TNFRSF8
RAP1B	KDM2A	PCDH8					SLC41A2	LFNG	RAB8B	SYS1	NR2C2	TNKS
RAP2B	KDM3A	PCGF5					SLC44A2	LIF	RARB	TAF9B	NR4A3	TRIM33
RASSF2	KHDRBS2	PDE3A					SLC6A6	LIMK2	RASA2	TBC1D12	NR6A1	TRIM39
RBM39	KIAA0195	PEAK1					SLMAP	LIPA	RASGEF1B	TBC1D22B	NRIP3	TRIM71
RC3H1	KIAA0226L	PGBD5					SMAD2	LMTK2	RASSF6	TFCP2	NTN4	TRPM7
REST	KIAA0247	PHF12					SMARCC2	LONRF3	RBFOX2	TGFBR1	NUDT18	TSPAN3
RFFL	KIAA0355	PI4KB					SMCR8	LPAR2	RBMS1	THRA	OSBPL10	TSTD2
RFX7	KIAA1549	PIAS2					SMOC2	LPHN1	REEP5	TIMM23	OTUD7A	TTC1
RGMB	KIAA1549L	PIK3CA					SMURF1	LRIG1	REL	TJP1	P4HA1	TTN
RIC8B	KIAA2013	PIP4K2B					SNTB2	LRP6	RELT	TLR4	PABPC1	TXLNG
RLIM	KIF1B	PITPNM3					SNX12	LRRC59	RFT1	TM7SF3	PABPC3	UBAP2L
RNF169	KIF2A	PKD2					SNX2	LRRFIP1	RFX1	TMEM115	PABPN1	UBE2H
RNF19A	KIF5A	PLEKHG3					SNX27	LTBP1	RHOA	TMEM123	PAM	UBE2Q1
ROR1	KIF5B	PLXNC1					SOCS7	MAFG	RNF115	TMEM168	PANK2	UBN2
RPS6KA3	KLF2	POMGNT1					SORCS1	MANEA	RNF152	TMEM180	PAQR4	UBQLN2
RPS6KA6	KPNA3	PPAP2B					SOX4	MAP2K6	RNF44	TMEM189	PAQR7	UBR1
S1PR1	LAMC3	PPIL1					SP4	MAP3K3	RNF7	TMEM189-UBE2V1	PAX2	UBXN10
SAP30	LARP1	PPM1A					SPRY1	MAPK8	ROBO2	TMEM218	PAX7	UFC1
SATB2	LDLRAD4	PPP1CB					SPRY4	MARCKSL1	RP11-160N1.10	TMEM50A	PDPK1	UNKL
SBF1	LFNG	PRCP					SRCAP	MBD6	RP11-650K20.3	TMEM98	PEG10	USP31
SBNO1	LHFPL2	PRKG1					ST5	MBNL3	RP1-170O19.20	TMOD2	PELI2	USP49
SCRN1	LIF	PROX1					STC2	MEF2C	RPL11	TNN	PET100	VANGL2
SEC22C	LIMK2	PRSS42					STK3	MEIS2	RRAGC	TOP2B	PHF8	VAPA
SEL1L	LIPA	PTCH1					STOX2	MET	RRAS2	TP53INP1	PHLPP2	VTI1A
SENP5	LMTK2	PTCHD1					STRADB	MFAP2	RTN3	TPCN1	PI4K2A	WDFY1
SERPINC1	LONRF3	PTEN					STRN	MGAT3	RUNX1T1	TPGS2	PIK3CB	XPR1
SH3D19	LPAR2	PTPN1					SULF1	MIA3	RUSC1	TRIO	PIK3R1	ZBTB18
SHF	LPHN1	PTPN3					SULF2	MINOS1-NBL1	SAMD8	TRMT61B	PIP4K2A	ZBTB38
SHROOM3	LPHN2	PURA					SYS1	MLLT3	SAR1A	TSC22D2	PKP1	ZC3H7B
SIAH1	LRIG1	PVRL3					TAF9B	MMRN2	SCHIP1	TSPAN12	PLEKHA2	ZCCHC5
SLAIN1	LRP6	PYGO1					TBC1D12	MOB3B	SCN1A	TSPAN17	PLEKHA8	ZFAND5
SLC29A4	LRRC59	RAB21					TBC1D22B	MOBP	SCN3A	TSSK2	PLEKHM1	ZFPM2
SLC2A1	LRRFIP1	RAB27B					TFCP2	MRC2	SDC4	TTK	PLEKHM2	ZMYM4
SLC30A5	LTBP1	RAB2A					TGFBR1	MRPL48	SGIP1	TTYH2	PLXNA4	ZNF146
SLC38A2	MAFG	RAB30					THRA	MRPS23	SIK2	TULP4	POGZ	ZNF226
SLC39A9	MANEA	RAB8B					TIMM23	MSH5	SIRPA	UBE2I	POLR2F	ZNF24
SLC41A2	MAP2K6	RAP1B					TJP1	MTPN	SIRT1	UBE2J1	POMT2	ZNF644
SLC44A2	MAP3K3	RARB					TLR4	MTRNR2L5	SKIL	UBE2V1	POTEG	ZNF777
SLC6A6	MAPK8	RASA2					TM7SF3	MXI1	SLAIN2	UBR5	POTEM
SLMAP	MARCKSL1	RASGEF1B					TMEM115	MYO5B	SLC10A4	UBXN7	POU3F3
SMAD2	MATR3	RASSF6					TMEM123	MYPN	SLC25A36	USP6NL	PPARGC1B
SMARCC2	MBD6	RBFOX2					TMEM168	MYT1L	SLC30A3	UST	PPFIA2
SMCR8	MBNL3	RBMS1					TMEM180	NAALADL1	SLC35B2	VEZF1	PPP1R10
SMOC2	MEF2C	RC3H1					TMEM189	NAGA	SLC35F1	WASF1	PPP2R5E
SMURF1	MEIS2	REEP5					TMEM189-UBE2V1	NAV3	SLC5A1	WBP1L	PRKAB2
SNTB2	MET	REL					TMEM218	NBL1	SLC5A3	WDFY3	PRKCB
SNX12	MFAP2	RELT					TMEM50A	NCAN	SLC6A9	WDR37	PRKCE
SNX2	MGAT1	RFT1					TMEM98	NCL	SLC7A1	WNK4	PRKD1
SNX27	MGAT3	RFX1					TMOD2	NCOA5	SLTM	WNT1	PRSS46
SOCS7	MIA3	RFX7					TNN	NCOA7	SMARCA2	YES1	PTGFR
SORCS1	MINOS1-NBL1	RHOA					TOP2B	NDST2	SMARCC1	YOD1	PTPRJ
SOX4	MLLT3	RNF115					TP53INP1	NDST3	SMIM13	ZBTB10	PTPRM
SP4	MMRN2	RNF152					TPCN1	NF1	SMUG1	ZBTB41	RAB11B
SPRED1	MOB3B	RNF44					TPGS2	NFIB	SNAP25	ZBTB7A	RAB23
SPRY1	MOBP	RNF7					TRIO	NHLH2	SOBP	ZC3HAV1	RAB5B
SPRY4	MRC2	ROBO2					TRMT61B	NID1	SOCS4	ZDHHC20	RAD51D
SRCAP	MRPL48	RP11-160N1.10					TSC22D2	NME1	SON	ZHX1	RAI14
ST5	MRPS23	RP11-650K20.3					TSPAN12	NOL4	SOS1	ZNF639	RASSF1
STC2	MSH5	RP1-170O19.20					TSPAN17	NOVA1	SOX12	ZNF652	RBM12
STK3	MTPN	RPL11					TSSK2	NPFFR2	SP3	ZNF710	RBM15B
STOX2	MTRNR2L5	RPS6KA3					TTK	NR2C2	SPPL3	ZNF74	RBM33
STRADB	MTSS1	RRAGC					TTYH2	NR4A3	SPRED2	ZNF800	RBM45
STRN	MXI1	RRAS2					TTYH3	NR6A1	SREK1	ZNF827	RCAN1
SULF1	MYO5B	RTN3					TULP4	NRIP3	SRGAP1		RCHY1
SULF2	MYPN	RUNX1T1					UBE2I	NSL1	SRGAP3		RERE
SYS1	MYT1L	RUSC1					UBE2J1	NTN4	SRPX2		REV3L
TAF9B	NAALADL1	SAMD8					UBE2V1	NUDT18	SRSF10		RFX5
TBC1D12	NAGA	SAR1A					UBR5	OSBPL10	SSR2		RFXAP
TBC1D22B	NAV3	SATB2					UBXN7	OTUD7A	SSR3		RHOC
TEAD1	NBL1	SCHIP1					USP6NL	P4HA1	STAG2		RIT2
TFCP2	NCAN	SCN1A					UST	PABPC1	SUV420H1		RNASEK-C17orf49
TGFBR1	NCKAP1	SCN3A					VEZF1	PABPC3	SUZ12		RNF20
THRA	NCL	SDC4					WASF1	PABPN1	SYN1		RNF34
TIMM23	NCOA5	SGIP1					WBP1L	PACSIN1	SYNC		RNF40
TJP1	NCOA7	SIK2					WDFY3	PAM	TAB2		RSBN1
TLR4	NDST1	SIRPA					WDR37	PANK2	TADA3		RSPH9
TM7SF3	NDST2	SIRT1					WNK4	PAQR4	TAF1D		RTN2
TMEM115	NDST3	SKIL					WNT1	PAQR7	TAF2		RTN4
TMEM120B	NF1	SLAIN2					YES1	PAX2	TBC1D25		RUFY4
TMEM123	NFIB	SLC10A4					YOD1	PAX7	TCEB3		RYBP
TMEM168	NHLH2	SLC25A36					YWHAG	PCDH10	TENM1		S1PR2
TMEM180	NID1	SLC30A3					ZBTB10	PDE3A	TET2		SAMD12
TMEM189	NME1	SLC35B2					ZBTB41	PDPK1	TET3		SATB1
TMEM189-UBE2V1	NOL4	SLC35F1					ZBTB7A	PEAK1	TGFA		SBK1
TMEM218	NOVA1	SLC5A1					ZC3HAV1	PEG10	TGIF2		SCRG1
TMEM260	NPFFR2	SLC5A3					ZDHHC20	PELI2	TIFAB		SCYL3
TMEM50A	NPR3	SLC6A9					ZHX1	PET100	TLE4		SDHC
TMEM98	NR2C2	SLC7A1					ZNF639	PGBD5	TLL2		SDHD
TMOD2	NR4A3	SLTM					ZNF652	PHF8	TMEFF2		SEC23IP
TNN	NR6A1	SMARCA2					ZNF710	PHLPP2	TMEM178B		SEC61A1
TOP2B	NRIP3	SMARCC1					ZNF74	PI4K2A	TMSB15B		SEMA3A
TP53INP1	NSL1	SMARCC2					ZNF800	PI4KB	TNFRSF8		SEPHS1
TPCN1	NTN4	SMCR8					ZNF827	PIK3CA	TNIK		SERAC1
TPGS2	NUDT18	SMIM13						PIK3CB	TNKS		SETD1A
TRIM44	OSBPL10	SMUG1						PIK3R1	TPRG1		SFT2D2
TRIO	OTUD7A	SNAP25						PIP4K2A	TRIM33		SH3BGRL3
TRMT61B	P4HA1	SOBP						PKP1	TRIM39		SHANK2
TSC22D2	PABPC1	SOCS4						PLEKHA2	TRIM71		SHANK3
TSPAN12	PABPC3	SON						PLEKHA8	TRPM7		SHC1
TSPAN17	PABPN1	SOS1						PLEKHM1	TRPS1		SIN3B
TSSK2	PACSIN1	SOX12						PLEKHM2	TSPAN3		SIPA1L3
TTK	PAM	SOX4						PLXNA4	TSTD2		SIX5
TTYH2	PANK2	SP3						PLXNC1	TTC1		SLC17A9
TTYH3	PAQR4	SP4						POGZ	TTC39C		SLC23A2
TULP4	PAQR7	SPPL3						POLR2F	TTN		SLC25A29
UBE2I	PAX2	SPRED2						POMT2	TXLNG		SLC29A2
UBE2J1	PAX7	SPRY4						POTEG	TYRO3		SLC35F6
UBE2V1	PCDH10	SREK1						POTEM	UBAP2L		SLC36A4
UBR5	PDE3A	SRGAP1						POU3F3	UBE2H		SLC46A1
UBXN7	PDPK1	SRGAP3						PPARGC1B	UBE2Q1		SLC7A14
USP6NL	PEAK1	SRPX2						PPFIA2	UBN2		SLC7A6
UST	PEG10	SRSF10						PPP1R10	UBP1		SLC8A1
VCPIP1	PELI2	SSR2						PPP2R5E	UBQLN2		SLITRK1
VEGFA	PET100	SSR3						PRKAB2	UBR1		SLITRK4
VEZF1	PGBD5	STAG2						PRKCB	UBXN10		SMAP1
WASF1	PHF8	SUV420H1						PRKCE	UCK2		SMG1
WBP1L	PHLPP2	SUZ12						PRKD1	UFC1		SNCA
WDFY3	PI4K2A	SYN1						PRSS46	UNKL		SNRNP27
WDR37	PI4KB	SYNC						PTCH1	USP1		SNX19
WEE1	PIK3CA	TAB2						PTCHD1	USP31		SNX21
WNK4	PIK3CB	TADA3						PTGFR	USP34		SNX22
WNT1	PIK3R1	TAF1D						PTPRJ	USP49		SOCS5
WNT9A	PIP4K2A	TAF2						PTPRM	USP9X		SORT1
YES1	PKP1	TBC1D25						RAB11B	VANGL2		SRCIN1
YOD1	PLEKHA2	TCEB3						RAB21	VAPA		SRPK1
YWHAG	PLEKHA8	TENM1						RAB23	VGLL2		SRRM1
ZBTB10	PLEKHG3	TET2						RAB30	VKORC1L1		SS18
ZBTB20	PLEKHM1	TET3						RAB5B	VSX2		SSH1
ZBTB41	PLEKHM2	TGFA						RAD51D	VTI1A		STARD3NL
ZBTB7A	PLXNA4	TGIF2						RAI14	WDFY1		STARD4
ZC3HAV1	PLXNC1	TIFAB						RASSF1	WDFY2		STIM2
ZDHHC20	POGZ	TLE4						RBM12	WDR91		STK35
ZHX1	POLR2F	TLL2						RBM15B	XPR1		STK4
ZNF639	POMGNT1	TMEFF2						RBM33	YWHAZ		STXBP4
ZNF652	POMT2	TMEM178B						RBM45	ZBTB18		SUGP1
ZNF710	POTEG	TMSB15B						RCAN1	ZBTB38		SVOP
ZNF74	POTEM	TNFRSF8						RCHY1	ZC3H4		SYVN1
ZNF800	POU3F3	TNIK						RELT	ZC3H6		SZT2
ZNF827	PPARGC1B	TNKS						RERE	ZC3H7B		TACC1
	PPFIA2	TPRG1						REV3L	ZCCHC5		TAF11
	PPP1R10	TRIM33						RFX5	ZFAND5		TAF4
	PPP2R5E	TRIM39						RFXAP	ZFPM2		TARDBP
	PRKAB2	TRIM71						RHOC	ZMYM4		TAX1BP3
	PRKCB	TRPM7						RIT2	ZNF131		TCF4
	PRKCE	TRPS1						RNASEK-C17orf49	ZNF146		TENM2
	PRKD1	TSPAN3						RNF20	ZNF207		TGFBR3
	PRPF38A	TSTD2						RNF34	ZNF226		THAP1
	PRSS46	TTC1						RNF40	ZNF24		THPO
	PTCH1	TTC39C						RNF44	ZNF644		TIGD3
	PTCHD1	TTN						RSBN1	ZNF777		TLL1
	PTGFR	TTYH3						RSPH9			TMED7
	PTPRJ	TXLNG						RTN2			TMED8
	PTPRM	TYRO3						RTN4			TMEM11
	RAB11B	UBAP2L						RUFY4			TMEM127
	RAB21	UBE2H						RUSC1			TMEM184B
	RAB23	UBE2Q1						RYBP			TMEM194A
	RAB30	UBN2						S1PR2			TMEM208
	RAB5B	UBP1						SAMD12			TMEM229B
	RAD51D	UBQLN2						SAMD8			TMEM55B
	RAI14	UBR1						SATB1			TNFAIP1
	RALGPS2	UBXN10						SBK1			TNFSF12
	RAP1B	UCK2						SCN1A			TNRC6A
	RASSF1	UFC1						SCN3A			TPK1
	RBM12	UNKL						SCRG1			TRAF6
	RBM15B	USP1						SCYL3			TRIM28
	RBM33	USP31						SDHC			TRMT10B
	RBM45	USP34						SDHD			TSPO2
	RC3H1	USP49						SEC23IP			TSPYL1
	RCAN1	USP9X						SEC61A1			TSPYL5
	RCHY1	VANGL2						SEMA3A			TSPYL6
	RELT	VAPA						SEPHS1			TTBK1
	RERE	VCPIP1						SERAC1			TTC9
	REV3L	VGLL2						SETD1A			TUB
	RFX5	VKORC1L1						SFT2D2			UBALD1
	RFX7	VSX2						SH3BGRL3			UBE2E2
	RFXAP	VTI1A						SHANK2			UBE2L3
	RGMB	WDFY1						SHANK3			UBR2
	RHOC	WDFY2						SHC1			UBTF
	RIT2	WDR91						SIN3B			UNC45A
	RNASEK-C17orf49	WEE1						SIPA1L3			UNC5C
	RNF20	WNT9A						SIRPA			UQCR10
	RNF34	XPR1						SIRT1			USP15
	RNF40	YWHAG						SIX5			USP32
	RNF44	YWHAZ						SLC17A9			USP36
	RSBN1	ZBTB18						SLC23A2			VPS13D
	RSPH9	ZBTB20						SLC25A29			VPS37C
	RTN2	ZBTB38						SLC29A2			VTI1B
	RTN4	ZC3H4						SLC30A3			WASF2
	RUFY4	ZC3H6						SLC35F6			WDR55
	RUSC1	ZC3H7B						SLC36A4			WDR82
	RYBP	ZCCHC5						SLC46A1			WNT2B
	S1PR2	ZFAND5						SLC7A14			WNT9B
	SAMD12	ZFPM2						SLC7A6			XPNPEP2
	SAMD8	ZMYM4						SLC8A1			YWHAE
	SATB1	ZNF131						SLITRK1			YY1
	SATB2	ZNF146						SLITRK4			ZDHHC18
	SBK1	ZNF207						SMAP1			ZFAT
	SCN1A	ZNF226						SMG1			ZFHX4
	SCN3A	ZNF24						SMUG1			ZFP36L2
	SCRG1	ZNF644						SNAP25			ZFYVE26
	SCYL3	ZNF777						SNCA			ZHX3
	SDHC							SNRNP27			ZMAT3
	SDHD							SNX19			ZNF292
	SEC23IP							SNX21			ZNF423
	SEC61A1							SNX22			ZNF445
	SEMA3A							SOCS5			ZNF618
	SEPHS1							SORT1			ZNF638
	SERAC1							SOX12			ZNF646
	SETD1A							SRCIN1			ZNF704
	SFT2D2							SRPK1			ZNF706
	SH3BGRL3							SRRM1			ZNF839
	SHANK2							SS18			ZNRF3
	SHANK3							SSH1			ZRANB1
	SHC1							SSR3
	SIN3B							STARD3NL
	SIPA1L3							STARD4
	SIRPA							STIM2
	SIRT1							STK35
	SIX5							STK4
	SLC17A9							STXBP4
	SLC23A2							SUGP1
	SLC25A29							SVOP
	SLC29A2							SYN1
	SLC30A3							SYNC
	SLC35F6							SYVN1
	SLC36A4							SZT2
	SLC46A1							TACC1
	SLC7A14							TAF11
	SLC7A6							TAF1D
	SLC8A1							TAF4
	SLITRK1							TARDBP
	SLITRK4							TAX1BP3
	SMAP1							TCF4
	SMG1							TENM1
	SMUG1							TENM2
	SNAP25							TGFBR3
	SNCA							THAP1
	SNRNP27							THPO
	SNX19							TIGD3
	SNX21							TLE4
	SNX22							TLL1
	SOCS5							TMED7
	SORT1							TMED8
	SOX12							TMEM11
	SPRED1							TMEM127
	SRCIN1							TMEM178B
	SRPK1							TMEM184B
	SRRM1							TMEM194A
	SS18							TMEM208
	SSH1							TMEM229B
	SSR3							TMEM55B
	STARD3NL							TNFAIP1
	STARD4							TNFSF12
	STIM2							TNIK
	STK35							TNRC6A
	STK4							TPK1
	STXBP4							TPRG1
	SUGP1							TRAF6
	SVOP							TRIM28
	SYN1							TRMT10B
	SYNC							TRPS1
	SYVN1							TSPO2
	SZT2							TSPYL1
	TACC1							TSPYL5
	TAF11							TSPYL6
	TAF1D							TTBK1
	TAF4							TTC39C
	TARDBP							TTC9
	TAX1BP3							TUB
	TCF4							TYRO3
	TEAD1							UBALD1
	TENM1							UBE2E2
	TENM2							UBE2L3
	TGFBR3							UBP1
	THAP1							UBR2
	THPO							UBTF
	TIGD3							UCK2
	TLE4							UNC45A
	TLL1							UNC5C
	TMED7							UQCR10
	TMED8							USP1
	TMEM11							USP15
	TMEM120B							USP32
	TMEM127							USP34
	TMEM178B							USP36
	TMEM184B							USP9X
	TMEM194A							VGLL2
	TMEM208							VKORC1L1
	TMEM229B							VPS13D
	TMEM260							VPS37C
	TMEM55B							VSX2
	TNFAIP1							VTI1B
	TNFSF12							WASF2
	TNIK							WDFY2
	TNRC6A							WDR55
	TPK1							WDR82
	TPRG1							WDR91
	TRAF6							WNT2B
	TRIM28							WNT9B
	TRIM44							XPNPEP2
	TRMT10B							YWHAE
	TRPS1							YWHAZ
	TSPO2							YY1
	TSPYL1							ZC3H4
	TSPYL5							ZC3H6
	TSPYL6							ZDHHC18
	TTBK1							ZFAT
	TTC39C							ZFHX4
	TTC9							ZFP36L2
	TUB							ZFYVE26
	TYRO3							ZHX3
	UBALD1							ZMAT3
	UBE2E2							ZNF131
	UBE2L3							ZNF207
	UBP1							ZNF292
	UBR2							ZNF423
	UBTF							ZNF445
	UCK2							ZNF618
	UNC45A							ZNF638
	UNC5C							ZNF646
	UQCR10							ZNF704
	USP1							ZNF706
	USP15							ZNF839
	USP32							ZNRF3
	USP34							ZRANB1
	USP36
	USP9X
	VCPIP1
	VEGFA
	VGLL2
	VKORC1L1
	VPS13D
	VPS37C
	VSX2
	VTI1B
	WASF2
	WDFY2
	WDR55
	WDR82
	WDR91
	WEE1
	WNT2B
	WNT9A
	WNT9B
	XPNPEP2
	YWHAE
	YWHAZ
	YY1
	ZBTB20
	ZC3H4
	ZC3H6
	ZDHHC18
	ZFAT
	ZFHX4
	ZFP36L2
	ZFYVE26
	ZHX3
	ZMAT3
	ZNF131
	ZNF207
	ZNF292
	ZNF423
	ZNF445
	ZNF618
	ZNF638
	ZNF646
	ZNF704
	ZNF706
	ZNF839
	ZNRF3
	ZRANB1

## Sheet: Supplemental Table S3
	miR-140-3.1 vs control		ID	probe_list	symbol	name	logFC	AveExpr	P.Value	adj.P.Val	ControlMean	ConditionMean			miR-140-3p.2 vs Con		ID	probe_list	symbol	name	logFC	AveExpr	P.Value	adj.P.Val	ControlMean	ConditionMean			miR-140-3p.1 vs miR-140-3p.2		ID	probe_list	symbol	name	logFC	AveExpr	P.Value	adj.P.Val	ControlMean	ConditionMean
	(gene_list_mic-iso_ii_0.05P_NoFC)	3870338	rupwjK1x5AUVdTP1sU	3870338	IFI44L	interferon-induced protein 44-like	-1.89126	9.54936	1.08562e-05	0.000584124	11.1346	9.24329			(gene_list_mic-iso_i_0.05P_NoFC)	3870338	rupwjK1x5AUVdTP1sU	3870338	IFI44L	interferon-induced protein 44-like	-2.03074	9.54936	3.98478e-06	0.000723827	11.1346	9.17355			(gene_list_iso_i-iso_ii_0.05P_NoFC)	1470632	3uRuHld7oJSfAVyV7g	1470632	UROS	uroporphyrinogen III synthase	-1.39281	9.9861	2.60881e-12	2.96178e-08	9.53195	8.83555
	Negative logFC indicates supression by miR-140-3p.1	1470632	3uRuHld7oJSfAVyV7g	1470632	UROS	uroporphyrinogen III synthase	-1.3703	9.9861	3.65161e-12	4.6063e-09	10.2058	8.83555			Negative logFC indicates supression by miR-140-3p.2	2000148	N4OCV6LHOJqV4h6eeE	2000148	IFIT1	interferon-induced protein with tetratricopeptide repeats 1	-1.58384	10.9221	0.000365712	0.0190893	12.133	10.838			Negative logFC indicates supression by miR-140-3p.1 vs -3p.2	4210128	Bhkvq.dMLNcvTsTWDk	4210128	MTPN	myotrophin	-0.851652	10.054	1.19456e-08	2.4658e-05	9.78144	9.35561
		520408	EEDSXrRSf9oEkiESKk	520408	IFIT3	interferon-induced protein with tetratricopeptide repeats 3	-1.36914	9.35332	0.000703519	0.0140288	10.3739	9.00479				2100196	uF4JJC4mp6Ku5KGF70	2100196	ISG15	ISG15 ubiquitin-like modifier	-1.4925	11.6619	1.98138e-06	0.000449891	12.7444	11.6207			Positive logFC indicates supression by miR-140-3p.2 vs -3p.2	4070088	EQOCo9zUkI17UIsl7o	4070088	CNIH1	cornichon family AMPA receptor auxiliary protein 1	-0.837412	10.3065	2.39854e-08	3.38383e-05	10.1043	9.68558
		2600747	0nhUk0lEd6voA7_Xvo	2600747	IFIT2	interferon-induced protein with tetratricopeptide repeats 2	-1.35294	8.85719	0.00226928	0.0330509	9.60213	8.24919				7320561	oid6lfUuflFcTHf7ek	7320561	OAS2	2'-5'-oligoadenylate synthetase 2, 69/71kDa	-1.48459	9.4742	8.05135e-06	0.0011871	10.5594	9.28942				4640445	oqjgg.l8f5UvXCHuL4	4640445	AIDA	axin interactor, dorsalization associated	-0.823034	9.66635	1.35396e-09	6.14859e-06	9.43281	9.02129
		5960343	iJedp7O.dkZ0Vn0uac	5960343	HELZ2	helicase with zinc finger 2, transcriptional coactivator	-1.28408	9.75645	3.71021e-08	6.2403e-06	10.5479	9.26379				7040035	3Aq_iknpEIp4peng8U	7040035	OAS1	2'-5'-oligoadenylate synthetase 1, 40/46kDa	-1.40306	8.40145	3.7843e-06	0.000704315	9.42719	8.16688				6590041	EUuyelHzUqf.cfTRCg	6590041	RNASE4	ribonuclease, RNase A family, 4	-0.79138	10.392	5.94148e-11	4.49691e-07	10.0684	9.6727
		6860482	lo4foRHV6R4It4Eel4	6860482	HERC6	HECT and RLD domain containing E3 ubiquitin protein ligase family member 6	-1.27494	8.73861	5.58364e-06	0.000342654	9.73502	8.46008				1690066	HFS7.KJOLlu7ubXtok	1690066	MX1	myxovirus (influenza virus) resistance 1, interferon-inducible protein p78 (mouse)	-1.38434	12.0153	0.000109904	0.00826317	13.1048	11.9589				5910382	9XmkEbkV4ohK6S42cc	5910382	RNASE4	ribonuclease, RNase A family, 4	-0.767429	10.0317	1.14954e-09	6.14859e-06	9.73486	9.35115
		2570300	WneIYOc6nkjh98ij_U	2570300	IFI44	interferon-induced protein 44	-1.24397	8.91766	1.39742e-05	0.00071084	9.91678	8.6728				2570300	WneIYOc6nkjh98ij_U	2570300	IFI44	interferon-induced protein 44	-1.28212	8.91766	9.25127e-06	0.00128497	9.91678	8.65373				2900187	WN4cuoB9Or9dN7Ttjg	2900187	CNIH1	cornichon family AMPA receptor auxiliary protein 1	-0.744015	10.4853	5.55938e-09	1.79461e-05	10.2305	9.85847
		1500280	9lUF6j54kqCf5O_dwo	1500280	IFIT3	interferon-induced protein with tetratricopeptide repeats 3	-1.23805	9.78303	0.00131263	0.0224822	10.8629	9.62484				1500280	9lUF6j54kqCf5O_dwo	1500280	IFIT3	interferon-induced protein with tetratricopeptide repeats 3	-1.27405	9.78303	0.0010095	0.038719	10.8629	9.60684				2490537	E6TRKkiWoJjg.oh3uo	2490537	TNFRSF1B	tumor necrosis factor receptor superfamily, member 1B	-0.683827	8.98374	1.81917e-06	0.000779358	8.88991	8.54799
		7040035	3Aq_iknpEIp4peng8U	7040035	OAS1	2'-5'-oligoadenylate synthetase 1, 40/46kDa	-1.11756	8.40145	7.72569e-05	0.00266744	9.42719	8.30963				6860482	lo4foRHV6R4It4Eel4	6860482	HERC6	HECT and RLD domain containing E3 ubiquitin protein ligase family member 6	-1.22855	8.73861	9.38712e-06	0.00129178	9.73502	8.48328				6480059	uR.XnXd7dyREHuDte4	6480059	ACTA2	actin, alpha 2, smooth muscle, aorta	-0.677483	10.0999	6.32293e-09	1.79461e-05	9.88675	9.54801
		5720482	Tpa8gVuHs93V_jFXOU	5720482	HERC5	HECT and RLD domain containing E3 ubiquitin protein ligase 5	-1.10926	9.27955	0.000185385	0.00510226	10.0275	8.91823				1090390	0IiH14JJlUUJ0Il01k	1090390	OAS1	2'-5'-oligoadenylate synthetase 1, 40/46kDa	-1.2035	8.39946	0.000175471	0.0115151	9.29818	8.24511				110181	NkGdd4Dn7f.3vlgMno	110181	KIAA1199	KIAA1199	-0.675192	11.7441	3.41641e-07	0.000225293	11.3416	11.004
		360132	E5w5yFLPwqcN0RdfJ4	360132	LHFPL2	lipoma HMGIC fusion partner-like 2	-1.10154	9.86206	2.69184e-10	1.1754e-07	10.2832	9.18162				3990170	oUL016nU_reU_ae0_Y	3990170	IFI27	interferon, alpha-inducible protein 27	-1.1703	11.8165	0.000563468	0.0260572	12.79	11.7611				3120767	ff7kki6fEerdDOVd_k	3120767	CNIH1	cornichon family AMPA receptor auxiliary protein 1	-0.6709	10.1947	1.43427e-06	0.000678468	9.96783	9.63238
		7320561	oid6lfUuflFcTHf7ek	7320561	OAS2	2'-5'-oligoadenylate synthetase 2, 69/71kDa	-1.05541	9.4742	0.000487833	0.0106815	10.5594	9.50402				1820750	ix1KUCgkUiUOgfjpXA	1820750	STAT1	signal transducer and activator of transcription 1, 91kDa	-0.98258	10.2588	6.38964e-07	0.00018365	10.912	10.0878				5910431	TTZOhZKKkj2hRyl4Dg	5910431	COL4A1	collagen, type IV, alpha 1	-0.665736	8.89288	1.13013e-08	2.4658e-05	8.75742	8.42455
		4290148	QcTp5rXYs3hZYjXono	4290148	HIST2H2AA4	histone cluster 2, H2aa4	-1.02422	8.43889	1.10442e-08	2.53302e-06	9.05891	8.03469				4900674	Wk6rmu6qk7nl77zq.8	4900674	BST2	bone marrow stromal cell antigen 2	-0.973984	7.91572	1.27222e-05	0.00167948	8.50113	7.65465				6370187	f7RJH0gDEQSVfeVWRI	6370187	RAI14	retinoic acid induced 14	-0.652667	10.4714	5.57101e-07	0.000324347	10.2331	9.90673
		6660601	E0LNfvhGlOFH9VupTo	6660601	HMOX1	heme oxygenase (decycling) 1	-0.990496	11.7161	1.68042e-09	4.91315e-07	12.4058	11.4153				450189	o3qVxJeiBeiDXEVEgU	450189	XAF1	XIAP associated factor 1	-0.973362	9.50744	0.000260995	0.0151331	10.2663	9.31656				1340470	HWkeCk5Je2ki7fBFI4	1340470	CECR5	cat eye syndrome chromosome region, candidate 5	-0.651806	9.97243	2.53347e-08	3.38383e-05	9.75152	9.42562
		3990010	9qsESLlfOCi_iNeQoI	3990010	IFI44L	interferon-induced protein 44-like	-0.979589	7.69769	1.21571e-06	0.000100377	8.40768	7.42809				3990010	9qsESLlfOCi_iNeQoI	3990010	IFI44L	interferon-induced protein 44-like	-0.970875	7.69769	1.39335e-06	0.000363648	8.40768	7.43245				2710735	ZtKFRqk837e49avnuE	2710735	RASD1	RAS, dexamethasone-induced 1	-0.641505	9.64734	1.4902e-08	2.7101e-05	9.38089	9.06014
		2190717	3knn2jUR7N7tNVE6tc	2190717	IL18BP	interleukin 18 binding protein	-0.966507	9.0007	2.2608e-07	2.56669e-05	9.52087	8.55437				1010246	0B2unl2eOJ63mNeDqo	1010246	IFI6	interferon, alpha-inducible protein 6	-0.959155	12.477	0.0013904	0.0483468	13.2779	12.4948				6270373	xiBIDLpPk5UkI2pXxU	6270373	MCUR1	mitochondrial calcium uniporter regulator 1	-0.635077	8.76405	2.79475e-06	0.00111329	8.53082	8.21328
		6400176	N4YTYufXzonoklZcgU	6400176	IRF7	interferon regulatory factor 7	-0.928408	9.87856	0.00013957	0.00409442	10.6227	9.69428				3450180	HdefXV5T01eVd1OCfg	3450180	OAS1	2'-5'-oligoadenylate synthetase 1, 40/46kDa	-0.95062	8.22091	9.28099e-06	0.00128497	8.87787	7.97339				7560541	TdR.nr0l9u6desG6dQ	7560541	SLC2A5	solute carrier family 2 (facilitated glucose/fructose transporter), member 5	-0.628167	8.92316	1.67099e-08	2.7101e-05	8.67504	8.36096
		450189	o3qVxJeiBeiDXEVEgU	450189	XAF1	XIAP associated factor 1	-0.926203	9.50744	0.00043982	0.00989546	10.2663	9.34014				6400176	N4YTYufXzonoklZcgU	6400176	IRF7	interferon regulatory factor 7	-0.948105	9.87856	0.000109555	0.00826317	10.6227	9.68443				770541	iRwF4H.Qdb666ikmpI	770541	EI24	etoposide induced 2.4	-0.627856	10.3847	8.11312e-08	7.67569e-05	10.2264	9.91243
		7050575	KUzo0FE5E18cSDW1.Q	7050575	PPAP2B	phosphatidic acid phosphatase type 2B	-0.916382	10.6438	1.07542e-11	9.76742e-09	10.8171	9.90072				5720482	Tpa8gVuHs93V_jFXOU	5720482	HERC5	HECT and RLD domain containing E3 ubiquitin protein ligase 5	-0.93272	9.27955	0.00108152	0.0404562	10.0275	9.00651				6770242	QXiUguq58x1QF_LtSU	6770242	MARCKSL1	MARCKS-like 1	-0.610153	8.83624	2.32993e-08	3.38383e-05	8.66881	8.36373
		3360343	NZ6BfqQoIO4kIsiIuU	3360343	RSAD2	radical S-adenosyl methionine domain containing 2	-0.914578	7.58239	8.09134e-05	0.0027669	8.13391	7.21934				2350504	09kidveWWSQwJ1.lmA	2350504	TYMP	thymidine phosphorylase	-0.913206	11.7796	1.49487e-05	0.00184471	12.4869	11.5786				5360148	uVnHtvPjRN7uCUCVbo	5360148	LIPA	lipase A, lysosomal acid, cholesterol esterase	-0.60653	8.66987	2.85886e-08	3.46273e-05	8.48009	8.17682
		2350504	09kidveWWSQwJ1.lmA	2350504	TYMP	thymidine phosphorylase	-0.903359	11.7796	1.72813e-05	0.000833096	12.4869	11.5835				990768	TpnrGwMhQ5Lyunf1CE	990768	OAS3	2'-5'-oligoadenylate synthetase 3, 100kDa	-0.905138	8.34476	4.15658e-06	0.000749042	9.01274	8.29114				5550768	rDrnu1ntRIAZXwslcU	5550768	NA	NA	-0.60435	9.59848	1.6506e-07	0.000126326	9.38541	9.08323
		1090390	0IiH14JJlUUJ0Il01k	1090390	OAS1	2'-5'-oligoadenylate synthetase 1, 40/46kDa	-0.902647	8.39946	0.00279	0.0381166	9.29818	8.39554				5700725	iqLR_Of0rw0ic6ucSk	5700725	EPSTI1	epithelial stromal interaction 1 (breast)	-0.897486	9.92876	0.000193733	0.0123913	10.6924	9.82684				1170445	QeSdz1iV8kVPWFMsw0	1170445	CADM1	cell adhesion molecule 1	-0.602582	8.67459	9.06709e-06	0.00263035	8.56587	8.26458
		6100022	cZUqab.lwTUpb3vFAg	6100022	HIST2H2AC	histone cluster 2, H2ac	-0.88195	8.14563	1.4941e-07	1.92756e-05	8.70442	7.82247				5960343	iJedp7O.dkZ0Vn0uac	5960343	HELZ2	helicase with zinc finger 2, transcriptional coactivator	-0.830884	9.75645	2.79764e-05	0.00294089	10.5479	9.49038				7400341	r3a619VkpK7ShaXDAQ	7400341	VPS51	vacuolar protein sorting 51 homolog (S. cerevisiae)	-0.602345	9.63981	1.60353e-05	0.00400107	9.32404	9.02287
		6590041	EUuyelHzUqf.cfTRCg	6590041	RNASE4	ribonuclease, RNase A family, 4	-0.881568	10.392	6.73837e-12	7.24832e-09	10.5543	9.6727				4150692	WguiinKqUS_efTwTIo	4150692	PARP14	poly (ADP-ribose) polymerase family, member 14	-0.818021	8.95054	7.96382e-07	0.000223242	9.56945	8.75768				870491	lSy3hs.Vfe1XLCVL54	870491	BUB3	BUB3 mitotic checkpoint protein	-0.599475	11.0617	6.60526e-07	0.000365802	10.9228	10.623
		1400634	QRltaupcktnU.Nn4jc	1400634	MT1M	metallothionein 1M	-0.87306	12.1579	1.57337e-08	3.24772e-06	12.7453	11.8723				7330392	osGi.IlKnjn_u6Ukd4	7330392	TAP1	transporter 1, ATP-binding cassette, sub-family B (MDR/TAP)	-0.789946	9.65852	2.60248e-05	0.00285469	10.1969	9.44437				5910338	igd57UpHn6fHNUkCHk	5910338	TMEM203	transmembrane protein 203	-0.593694	9.77165	2.89755e-08	3.46273e-05	9.63161	9.33476
		610451	xYf1Y2UpKL93a4cc2c	610451	HIST2H2AA3	histone cluster 2, H2aa3	-0.862373	8.18933	1.24835e-09	4.10798e-07	8.70656	7.84419				4290148	QcTp5rXYs3hZYjXono	4290148	HIST2H2AA4	histone cluster 2, H2aa4	-0.764462	8.43889	1.42878e-06	0.000368658	9.05891	8.16456				4060358	uud.vTT6V09Qkfxnt4	4060358	ABCA1	ATP-binding cassette, sub-family A (ABC1), member 1	-0.584379	9.08948	1.88623e-06	0.000793123	8.8038	8.51161
		2710735	ZtKFRqk837e49avnuE	2710735	RASD1	RAS, dexamethasone-induced 1	-0.861959	9.64734	5.59721e-11	3.33682e-08	9.9221	9.06014				4810187	ikRLn9bpHkxDeKXXd0	4810187	STAT1	signal transducer and activator of transcription 1, 91kDa	-0.75806	11.6125	2.4818e-06	0.000541845	12.1113	11.4527				5890630	TkydF.cBUvCToIisso	5890630	MTPN	myotrophin	-0.580551	8.60623	4.20281e-05	0.00763433	8.40022	8.10994
		3450180	HdefXV5T01eVd1OCfg	3450180	OAS1	2'-5'-oligoadenylate synthetase 1, 40/46kDa	-0.85834	8.22091	3.59265e-05	0.00147513	8.87787	8.01953				5490240	cVdrdRuuzo3utPtXeQ	5490240	MAP1LC3A	microtubule-associated protein 1 light chain 3 alpha	-0.746872	10.3963	1.59466e-06	0.000393569	10.594	10.13				2140121	oSEiVHyftROjdDlDXU	2140121	BASP1	brain abundant, membrane attached signal protein 1	-0.576646	11.3788	1.88583e-05	0.00432521	11.1286	10.8403
		2650730	WUCfbfu.nki49qp4XI	2650730	STC1	stanniocalcin 1	-0.850393	9.09082	2.22805e-08	4.14674e-06	9.43307	8.58267				4570441	T03kDulKfqgQ465ECk	4570441	IFIH1	interferon induced with helicase C domain 1	-0.743904	7.79964	1.37545e-05	0.00177425	8.32339	7.62202				3170292	00nHeBI8cKU3XTdwqI	3170292	DDAH1	dimethylarginine dimethylaminohydrolase 1	-0.575576	8.77077	8.29843e-07	0.000428237	8.53984	8.25205
		290730	i7o1RUDUHTXr_eRHr0	290730	HIST1H2BD	histone cluster 1, H2bd	-0.846867	9.15582	6.84389e-08	1.04998e-05	9.65439	8.80752				6660601	E0LNfvhGlOFH9VupTo	6660601	HMOX1	heme oxygenase (decycling) 1	-0.735153	11.7161	3.11548e-07	0.000104029	12.4058	11.5429				4060576	9JVJ533Khc6pfbpN3s	4060576	SLC35D2	solute carrier family 35 (UDP-GlcNAc/UDP-glucose transporter), member D2	-0.569516	8.13093	1.59016e-08	2.7101e-05	8.10594	7.82119
		5700725	iqLR_Of0rw0ic6ucSk	5700725	EPSTI1	epithelial stromal interaction 1 (breast)	-0.83364	9.92876	0.000425985	0.00966276	10.6924	9.85876				2120079	fb3eXRMnxCUnogM6x0	2120079	EIF2AK2	eukaryotic translation initiation factor 2-alpha kinase 2	-0.732856	9.61435	1.83985e-05	0.00212059	10.1517	9.44377				1990630	cTqn3heJFCvioSjyko	1990630	TRIB3	tribbles homolog 3 (Drosophila)	-0.56857	9.06416	7.27572e-08	7.18272e-05	8.84929	8.565
		6370187	f7RJH0gDEQSVfeVWRI	6370187	RAI14	retinoic acid induced 14	-0.833032	10.4714	8.86776e-09	2.07579e-06	10.7398	9.90673				2070059	op3vv4MBuBuBUpoKhU	2070059	PARP10	poly (ADP-ribose) polymerase family, member 10	-0.731353	8.42473	2.72203e-05	0.00290562	8.87045	8.22087				7050575	KUzo0FE5E18cSDW1.Q	7050575	PPAP2B	phosphatidic acid phosphatase type 2B	-0.561123	10.6438	1.05562e-07	9.58756e-05	10.1813	9.90072
		20452	fIB26Kp7Wd666G8L2g	20452	TYMP	thymidine phosphorylase	-0.819315	8.18362	2.04512e-05	0.000940011	8.77876	7.95944				3130307	H66G8L2iqWW31UFKJI	3130307	TYMP	thymidine phosphorylase	-0.726758	8.01436	0.000143221	0.00997541	8.58997	7.85442				2470070	6vSOEmFl.09VWUXsdE	2470070	TBL1X	transducin (beta)-like 1X-linked	-0.560768	9.72724	6.58888e-07	0.000365802	9.62259	9.34221
		1340470	HWkeCk5Je2ki7fBFI4	1340470	CECR5	cat eye syndrome chromosome region, candidate 5	-0.815683	9.97243	4.0545e-10	1.64396e-07	10.2413	9.42562				2190717	3knn2jUR7N7tNVE6tc	2190717	IL18BP	interleukin 18 binding protein	-0.724962	9.0007	1.64124e-05	0.00198223	9.52087	8.67514				4280202	NjuS6jJK0vjfeSgrkk	4280202	NA	NA	-0.548711	10.1566	4.78658e-06	0.00175297	9.9794	9.70505
		4210524	xgu_Ce51XwNukoiPCs	4210524	RND3	Rho family GTPase 3	-0.813979	11.1922	1.38029e-07	1.8328e-05	11.7225	10.9085				4890270	fSohbtLKju5enuxurs	4890270	LY6E	lymphocyte antigen 6 complex, locus E	-0.723096	11.8466	8.39664e-05	0.00676079	12.4551	11.8007				2970672	3X5F_5LNfz97nvd14k	2970672	ANKIB1	ankyrin repeat and IBR domain containing 1	-0.545279	9.48662	3.1164e-08	3.53805e-05	9.35745	9.08481
		2710064	fVSZEVPRHRlBHdngR8	2710064	NA	NA	-0.813038	11.3435	9.54309e-07	8.302e-05	11.7757	10.9627				2510220	uUK90R6Xqfq5UzKK3s	2510220	IFI35	interferon-induced protein 35	-0.717113	10.1932	6.98809e-05	0.0059638	10.7211	9.9787				1090747	ER7He6kKOrUghVH0pE	1090747	TNFSF12	tumor necrosis factor (ligand) superfamily, member 12	-0.535767	8.45025	7.98244e-07	0.00042151	8.20349	7.93561
		4210128	Bhkvq.dMLNcvTsTWDk	4210128	MTPN	myotrophin	-0.805674	10.054	3.18487e-08	5.47845e-06	10.1613	9.35561				2570079	KZTRJ4H74jVbvHlzSQ	2570079	STAT1	signal transducer and activator of transcription 1, 91kDa	-0.712166	11.3753	0.000145849	0.0100658	11.8646	11.2463				7100288	HIXrpEnSp50S4KQxR4	7100288	CCT2	chaperonin containing TCP1, subunit 2 (beta)	-0.535366	10.2321	1.59766e-05	0.00400107	10.0697	9.80203
		4150692	WguiinKqUS_efTwTIo	4150692	PARP14	poly (ADP-ribose) polymerase family, member 14	-0.805535	8.95054	1.011e-06	8.63872e-05	9.56945	8.76392				1470382	cl2ge4RVTfYfSLffUI	1470382	IRF7	interferon regulatory factor 7	-0.711331	7.99257	1.55178e-05	0.00190458	8.50665	7.83749				7000086	olSgryO7_QML5UCrVU	7000086	KCTD20	potassium channel tetramerization domain containing 20	-0.533285	9.38334	7.20114e-05	0.0108284	9.32497	9.05833
		1240440	fSUyR.vR7Xu0iR4nUU	1240440	TXNIP	thioredoxin interacting protein	-0.804748	12.2281	3.95704e-09	1.05704e-06	12.4753	11.6705				5700735	6X_RJNfoqj2Qukle_M	5700735	PARP9	poly (ADP-ribose) polymerase family, member 9	-0.696173	9.60449	0.000611454	0.0274889	10.0833	9.50968				5360154	o7tElIqEC7q416IZS8	5360154	ZDHHC7	zinc finger, DHHC-type containing 7	-0.528388	10.288	4.32832e-08	4.46722e-05	10.0424	9.77816
		7400341	r3a619VkpK7ShaXDAQ	7400341	VPS51	vacuolar protein sorting 51 homolog (S. cerevisiae)	-0.804494	9.63981	2.13292e-07	2.4964e-05	9.82736	9.02287				3360343	NZ6BfqQoIO4kIsiIuU	3360343	RSAD2	radical S-adenosyl methionine domain containing 2	-0.693267	7.58239	0.00144337	0.0496563	8.13391	7.32999				3460008	c0eXxdXRr77ih4u7oI	3460008	TMEM173	transmembrane protein 173	-0.524963	10.047	2.95753e-06	0.0011382	9.88766	9.62518
		5090671	QWq7Z1IXOOH7yUCHlE	5090671	GDF15	growth differentiation factor 15	-0.797175	10.0197	2.12724e-08	4.05893e-06	10.431	9.63386				2650193	THp8GLRJdJ7nqGFft0	2650193	SDC4	syndecan 4	-0.692905	10.6827	7.32014e-09	5.01227e-06	10.9587	10.6085				270152	3KehFd5YsOG7unqF98	270152	SLC7A5	solute carrier family 7 (amino acid transporter light chain, L system), member 5	-0.523527	10.4063	3.23035e-05	0.00632313	10.3343	10.0725
		1580561	uqElee0jgBIOEbANYo	1580561	MT1H	metallothionein 1H	-0.78732	8.09549	4.1849e-09	1.10491e-06	8.58763	7.80031				5360156	fp75V5VfrXlXIxJL8w	5360156	IFITM1	interferon induced transmembrane protein 1	-0.692458	13.1377	6.05811e-05	0.00529059	13.6822	12.991				4070044	WtVe_sT_vF0.5b9I_4	4070044	RNF38	ring finger protein 38	-0.519979	8.64307	1.08646e-06	0.000548205	8.53086	8.27087
		7560541	TdR.nr0l9u6desG6dQ	7560541	SLC2A5	solute carrier family 2 (facilitated glucose/fructose transporter), member 5	-0.771199	8.92316	3.72157e-10	1.5364e-07	9.13216	8.36096				6100022	cZUqab.lwTUpb3vFAg	6100022	HIST2H2AC	histone cluster 2, H2ac	-0.689549	8.14563	6.58028e-06	0.00103758	8.70442	7.91867				6650189	fqiMRwVUgOHnCXfl_0	6650189	PEX5	peroxisomal biogenesis factor 5	-0.516515	9.99626	2.60676e-06	0.00105695	9.84799	9.58973
		2510220	uUK90R6Xqfq5UzKK3s	2510220	IFI35	interferon-induced protein 35	-0.767752	10.1932	2.98549e-05	0.00126945	10.7211	9.95338				2940687	HSIVJI7B3T7JTVAgBU	2940687	TMEM245	transmembrane protein 245	-0.685952	8.34062	1.73527e-09	1.57604e-06	8.70521	8.18487				5960021	K5XvN1y5wQxHUtOJak	5960021	PIP4K2A	phosphatidylinositol-5-phosphate 4-kinase, type II, alpha	-0.513441	10.8195	1.62851e-06	0.000738933	10.7002	10.4435
		4220246	xX56r6K.R_RNOir8uc	4220246	CCL20	chemokine (C-C motif) ligand 20	-0.765734	10.6252	2.16938e-08	4.07091e-06	11.1656	10.3998				6060484	BkH9RXlT.7AHktN_hc	6060484	MARCKS	myristoylated alanine-rich protein kinase C substrate	-0.682308	11.6066	1.51571e-10	2.75729e-07	11.9047	11.5084				1070754	iuXtF7fR5df9XtOdNI	1070754	CAP1	CAP, adenylate cyclase-associated protein 1 (yeast)	-0.511657	11.5076	1.88199e-05	0.00432521	11.3515	11.0956
		2140121	oSEiVHyftROjdDlDXU	2140121	BASP1	brain abundant, membrane attached signal protein 1	-0.76376	11.3788	2.98153e-07	3.23917e-05	11.604	10.8403				3890609	iXpUnp.XtUDSUuzDSU	3890609	PLSCR1	phospholipid scramblase 1	-0.6695	8.53174	0.000324451	0.0174988	8.97017	8.38933				4200543	NiJ34UuDRSWMYG35QQ	4200543	GPX7	glutathione peroxidase 7	-0.510456	9.51215	2.1904e-06	0.000904279	9.42812	9.17289
		130093	3fdn6gdS3Rdp_Q6FUE	130093	MT1H	metallothionein 1H	-0.751786	12.9746	6.77758e-09	1.69112e-06	13.4587	12.7069				2340072	utE_0gSunnu65TYtXk	2340072	PARP12	poly (ADP-ribose) polymerase family, member 12	-0.66815	8.76115	5.79002e-05	0.00507599	9.2824	8.60434				1780619	fR1MSzyuKOjmpntflo	1780619	EHD1	EH-domain containing 1	-0.510342	9.37859	1.6391e-05	0.00404536	9.21978	8.96461
		5910431	TTZOhZKKkj2hRyl4Dg	5910431	COL4A1	collagen, type IV, alpha 1	-0.751205	8.89288	1.22418e-09	4.08767e-07	9.17576	8.42455				3140707	rfqvqsrIxQOAR.ShfU	3140707	PARP9	poly (ADP-ribose) polymerase family, member 9	-0.66264	8.0972	8.83213e-05	0.00698754	8.55118	7.9729				50435	inuu5Me7LxMlfUPerU	50435	DNM1L	dynamin 1-like	-0.508264	8.05781	2.02763e-05	0.00446984	7.95841	7.70428
		3130307	H66G8L2iqWW31UFKJI	3130307	TYMP	thymidine phosphorylase	-0.744356	8.01436	0.000108707	0.00345701	8.58997	7.84562				4220044	QEpXPUlV_fR3FoSGkk	4220044	SLC15A3	solute carrier family 15 (oligopeptide transporter), member 3	-0.656488	10.3737	0.000432216	0.0212422	10.8467	10.2974				5340142	NXui3vHvf3kKHRdfiU	5340142	RCL1	RNA terminal phosphate cyclase-like 1	-0.50781	9.37335	1.437e-07	0.000116531	9.17046	8.91656
		5340142	NXui3vHvf3kKHRdfiU	5340142	RCL1	RNA terminal phosphate cyclase-like 1	-0.73261	9.37335	1.84153e-10	8.89654e-08	9.64917	8.91656				1820592	ipWbdgqkXuB0Ap3.SI	1820592	HIST2H2AA3	histone cluster 2, H2aa3	-0.629938	8.06641	0.00030256	0.0167284	8.53614	7.89718				3940500	clCJam8z5j6R.OeFNo	3940500	OSR1	odd-skipped related 1 (Drosophila)	-0.507369	9.40161	1.04529e-05	0.00289005	9.24687	8.99318
		6590594	33obrCQopAnZlAmA1Y	6590594	HIST1H2AC	histone cluster 1, H2ac	-0.730138	8.55375	1.40178e-08	3.06047e-06	8.96398	8.23384				2070170	3XUk9LUqolGgFO9_fA	2070170	UBE2L6	ubiquitin-conjugating enzyme E2L 6	-0.614549	11.2087	0.000142801	0.00997541	11.674	11.0646				1300743	Zhsfhe6FeOShJSh900	1300743	IAH1	isoamyl acetate-hydrolyzing esterase 1 homolog (S. cerevisiae)	-0.506113	10.2326	1.2609e-06	0.000622391	10.1211	9.86805
		5910382	9XmkEbkV4ohK6S42cc	5910382	RNASE4	ribonuclease, RNase A family, 4	-0.729694	10.0317	2.95056e-09	8.17018e-07	10.0808	9.35115				4210524	xgu_Ce51XwNukoiPCs	4210524	RND3	Rho family GTPase 3	-0.608158	11.1922	1.15612e-05	0.00155486	11.7225	11.0114				360132	E5w5yFLPwqcN0RdfJ4	360132	LHFPL2	lipoma HMGIC fusion partner-like 2	-0.50048	9.86206	8.16557e-05	0.0120394	9.43186	9.18162
		3870594	NX9EfunjuDnhYBOiNU	3870594	IFI16	interferon, gamma-inducible protein 16	-0.726306	8.59224	2.21977e-07	2.54556e-05	8.95232	8.22601				360132	E5w5yFLPwqcN0RdfJ4	360132	LHFPL2	lipoma HMGIC fusion partner-like 2	-0.601058	9.86206	7.60727e-06	0.00114164	10.2832	9.43186				1740543	lPl3ht63.otHeTieeE	1740543	JAK1	Janus kinase 1	-0.494697	9.14766	0.000129852	0.0170429	8.98507	8.73773
		4900674	Wk6rmu6qk7nl77zq.8	4900674	BST2	bone marrow stromal cell antigen 2	-0.718984	7.91572	0.000466603	0.0103161	8.50113	7.78215				240722	EUAD7d6Qy8X1SMStVU	240722	OAS2	2'-5'-oligoadenylate synthetase 2, 69/71kDa	-0.600718	7.34783	6.41099e-06	0.00103074	7.79634	7.24031				6980010	3qL.LbKXzjDxVmuu7I	6980010	MED28	mediator complex subunit 28	-0.49104	9.2602	6.34891e-06	0.00208815	9.10445	8.85893
		7330392	osGi.IlKnjn_u6Ukd4	7330392	TAP1	transporter 1, ATP-binding cassette, sub-family B (MDR/TAP)	-0.715034	9.65852	8.95829e-05	0.00299128	10.1969	9.48183				20452	fIB26Kp7Wd666G8L2g	20452	TYMP	thymidine phosphorylase	-0.599332	8.18362	0.000726478	0.0310648	8.77876	8.06943				1090414	QUX6npHfJEXiEj8JdU	1090414	TMEM203	transmembrane protein 203	-0.490197	9.71574	2.64792e-07	0.000187886	9.55968	9.31458
		630091	WeyXq7G.R0L3XHih34	630091	NCOA7	nuclear receptor coactivator 7	-0.713857	8.9312	4.25993e-06	0.000270941	9.31218	8.59832				4640703	BuOl._Or.vu37gQtvE	4640703	CHMP5	charged multivesicular body protein 5	-0.593153	9.90004	9.47708e-07	0.000259261	10.1698	9.75292				6020719	fV011w74gDQP16u7X4	6020719	RAB23	RAB23, member RAS oncogene family	-0.489549	9.42289	1.19855e-05	0.00323979	9.27577	9.03099
		7650097	ukoevq3qjc6TUIS4R0	7650097	OASL	2'-5'-oligoadenylate synthetase-like	-0.710746	7.5967	0.000712418	0.0141153	8.03058	7.31983				3130576	WULO_39Q65fn653Xro	3130576	CHIC2	cysteine-rich hydrophobic domain 2	-0.581663	9.79903	1.33594e-06	0.000352718	9.9887	9.69296				4850674	Ek9TyQi_xVdVLfZfXc	4850674	PSAT1	phosphoserine aminotransferase 1	-0.488339	9.72983	5.7166e-06	0.00199251	9.60133	9.35716
		2260477	TlzuclRAgz7dPJeDuU	2260477	PTGS2	prostaglandin-endoperoxide synthase 2 (prostaglandin G/H synthase and cyclooxygenase)	-0.706642	7.90228	1.70217e-07	2.1236e-05	8.27156	7.56492				7400689	6uVd7N.4guaDK_fcUU	7400689	GID8	GID complex subunit 8	-0.575917	9.64047	2.60197e-08	1.37396e-05	9.95556	9.51099				650458	imM9It1UhaS006S.SY	650458	FILIP1L	filamin A interacting protein 1-like	-0.480563	8.31612	3.45978e-05	0.00671435	8.14208	7.9018
		6770242	QXiUguq58x1QF_LtSU	6770242	MARCKSL1	MARCKS-like 1	-0.704966	8.83624	1.68777e-09	4.91315e-07	9.0687	8.36373				3170136	3t9fhRTT15ePIqfXTo	3170136	SAMD9L	sterile alpha motif domain containing 9-like	-0.574541	9.06335	0.000901303	0.035694	9.49128	8.97983				6270646	TXm4UjVovoAQ4ApVQo	6270646	MYC	v-myc avian myelocytomatosis viral oncogene homolog	-0.479289	9.70729	1.60089e-05	0.00400107	9.66134	9.4217
		4060358	uud.vTT6V09Qkfxnt4	4060358	ABCA1	ATP-binding cassette, sub-family A (ABC1), member 1	-0.699281	9.08948	1.08311e-07	1.48151e-05	9.21089	8.51161				610451	xYf1Y2UpKL93a4cc2c	610451	HIST2H2AA3	histone cluster 2, H2aa3	-0.571102	8.18933	1.4538e-06	0.0003709	8.70656	7.98982				1240440	fSUyR.vR7Xu0iR4nUU	1240440	TXNIP	thioredoxin interacting protein	-0.477805	12.2281	1.67383e-05	0.00408667	11.9094	11.6705
		270152	3KehFd5YsOG7unqF98	270152	SLC7A5	solute carrier family 7 (amino acid transporter light chain, L system), member 5	-0.698527	10.4063	5.14469e-07	5.01354e-05	10.771	10.0725				4900520	lpI4BStHqi3n0.XeJ4	4900520	SCG2	secretogranin II	-0.563775	8.63103	7.62892e-07	0.000216528	9.12386	8.53374				5890241	6dUoDtfd6beflfeLeU	5890241	ZFYVE26	zinc finger, FYVE domain containing 26	-0.476822	8.98711	2.60246e-05	0.00537194	8.86642	8.62801
		3710068	BLXpdZI59P_Ffp5LoI	3710068	WARS	tryptophanyl-tRNA synthetase	-0.698325	10.0834	7.1408e-09	1.74917e-06	10.2426	9.54425				7650128	f5OhpkpWUh8KhetFGc	7650128	TYMP	thymidine phosphorylase	-0.559211	8.00873	0.00130069	0.0460739	8.517	7.89667				3870500	QZXtSkcinV_G.pI4AE	3870500	FOXD1	forkhead box D1	-0.475496	9.85484	5.02178e-06	0.00180991	9.70717	9.46942
		4610520	K0vg5eesn.U97onlvU	4610520	GCNT3	glucosaminyl (N-acetyl) transferase 3, mucin type	-0.697266	7.59302	2.38428e-09	6.68365e-07	7.9988	7.30153				5820097	BwuX4noOqCqhCrS3to	5820097	TMBIM1	transmembrane BAX inhibitor motif containing 1	-0.555382	10.7435	1.56957e-05	0.00191605	10.9558	10.6301				5490068	rCF0505LoT9_l7.Xuo	5490068	MCOLN2	mucolipin 2	-0.473748	9.44101	2.17832e-05	0.00475587	9.37539	9.13852
		1820632	fQBeoP6vuzmDv0uXSE	1820632	PTGS2	prostaglandin-endoperoxide synthase 2 (prostaglandin G/H synthase and cyclooxygenase)	-0.691024	9.31796	2.1075e-06	0.000152884	9.65676	8.96573				5700707	BvwUf55wj.ltU9U..U	5700707	SPRED1	sprouty-related, EVH1 domain containing 1	-0.549593	9.16128	1.7785e-05	0.00206034	9.48303	9.01326				1580129	Tld5ZCAS7iceUZ4AcU	1580129	MRPS7	mitochondrial ribosomal protein S7	-0.473737	8.5699	5.79168e-06	0.00199251	8.45509	8.21822
		5360156	fp75V5VfrXlXIxJL8w	5360156	IFITM1	interferon induced transmembrane protein 1	-0.689947	13.1377	6.3324e-05	0.00226788	13.6822	12.9922				2190148	ivdSKCuggFOpKLKD4s	2190148	GBP1	guanylate binding protein 1, interferon-inducible	-0.548796	8.53227	0.000234775	0.014122	8.96142	8.57633				6250435	Kf7KZTSUf8glNJS7vo	6250435	ARHGEF3	Rho guanine nucleotide exchange factor (GEF) 3	-0.47141	8.86239	3.27672e-07	0.000225293	8.64188	8.40618
		2340072	utE_0gSunnu65TYtXk	2340072	PARP12	poly (ADP-ribose) polymerase family, member 12	-0.687984	8.76115	4.02637e-05	0.00160391	9.2824	8.59442				1740746	NoHuDMfXgqiogqKCdU	1740746	PLK2	polo-like kinase 2	-0.545119	8.47156	4.66728e-05	0.00430794	8.87149	8.28356				380019	KJ1Ar0e795Z7XovtFE	380019	DDIT4L	DNA-damage-inducible transcript 4-like	-0.471117	10.6471	0.000102341	0.0142562	10.4713	10.2357
		6220097	6Wwu19TkK1R3K4yEqE	6220097	PPAP2B	phosphatidic acid phosphatase type 2B	-0.686137	9.35448	2.32332e-07	2.62454e-05	9.43952	8.75338				5260612	cXifOcArqOHSJ6p60U	5260612	TRIM25	tripartite motif containing 25	-0.544024	8.97631	6.45655e-06	0.00103074	9.3293	8.7941				1340634	fio9xXgTF0SNdXtOUQ	1340634	GLB1	galactosidase, beta 1	-0.468626	10.8389	3.60063e-07	0.0002271	10.7124	10.4781
		2120079	fb3eXRMnxCUnogM6x0	2120079	EIF2AK2	eukaryotic translation initiation factor 2-alpha kinase 2	-0.682968	9.61435	4.55786e-05	0.00176605	10.1517	9.46871				2260066	6l.js.1XQjzQe7vYS4	2260066	CLIP1	CAP-GLY domain containing linker protein 1	-0.537835	9.07992	7.2534e-06	0.00110534	9.43039	8.99253				6380241	W5UMd_VNdn55XKO13s	6380241	UNC45A	unc-45 homolog A (C. elegans)	-0.468395	8.84677	1.36208e-05	0.00355487	8.72883	8.49463
		7650128	f5OhpkpWUh8KhetFGc	7650128	TYMP	thymidine phosphorylase	-0.681454	8.00873	0.000177029	0.00490797	8.517	7.83555				5960747	BhFLTHp0qVFnDl8OA0	5960747	TRIM22	tripartite motif containing 22	-0.53758	7.62128	0.000282448	0.0159138	7.95694	7.406				7570576	9IihNNBtcSiFS9LnSo	7570576	PRUNE2	prune homolog 2 (Drosophila)	-0.468022	8.45935	0.000534762	0.0472463	8.32523	8.09122
		5390161	BdXlXor7fQnuh96j_Q	5390161	DUSP5	dual specificity phosphatase 5	-0.681319	7.89265	5.62033e-09	1.43388e-06	8.29279	7.61147				1030747	lBLUXe7cU4VX10R4Xs	1030747	HLA-E	major histocompatibility complex, class I, E	-0.537386	11.5575	5.30899e-06	0.000920198	11.9232	11.3973				4670020	TWn13iT2Ol8kXTQlJE	4670020	NIPA2	non imprinted in Prader-Willi/Angelman syndrome 2	-0.465111	10.0562	2.94281e-06	0.0011382	9.91747	9.68491
		6250435	Kf7KZTSUf8glNJS7vo	6250435	ARHGEF3	Rho guanine nucleotide exchange factor (GEF) 3	-0.676453	8.86239	5.40311e-10	2.04472e-07	9.08263	8.40618				620458	xVei1iCgDoPevTHutU	620458	SMARCC1	SWI/SNF related, matrix associated, actin dependent regulator of chromatin, subfamily c, member 1	-0.525148	8.7464	3.43847e-05	0.00339452	8.91273	8.59697				6110204	0qd7bveQ31U9V043ek	6110204	MKLN1	muskelin 1, intracellular mediator containing kelch motifs	-0.464298	9.61598	5.16477e-05	0.00860306	9.53731	9.30516
		6200669	Wc8GcY5eBcULedeVQI	6200669	HIST1H2BD	histone cluster 1, H2bd	-0.672648	8.42764	2.10771e-07	2.48122e-05	8.818	8.14535				4220246	xX56r6K.R_RNOir8uc	4220246	CCL20	chemokine (C-C motif) ligand 20	-0.523746	10.6252	8.82999e-06	0.00126032	11.1656	10.5208				1430647	cq56XVSr_X3xo.IYr0	1430647	TAX1BP3	Tax1 (human T-cell leukemia virus type I) binding protein 3	-0.463304	10.4021	1.23992e-05	0.00327367	10.2244	9.99272
		1820750	ix1KUCgkUiUOgfjpXA	1820750	STAT1	signal transducer and activator of transcription 1, 91kDa	-0.665879	10.2588	0.000129459	0.00391735	10.912	10.2461				4480600	r3kCqbknnu3juqEnfc	4480600	MT1P3	metallothionein 1 pseudogene 3	-0.520194	10.2214	1.25152e-05	0.00167159	10.6545	10.0809				6280270	Tid4J.g09LrojpfesE	6280270	TMEM66	transmembrane protein 66	-0.456802	11.7891	2.36763e-05	0.00497772	11.5606	11.3322
		3170292	00nHeBI8cKU3XTdwqI	3170292	DDAH1	dimethylarginine dimethylaminohydrolase 1	-0.664462	8.77077	8.02012e-08	1.21403e-05	8.91651	8.25205				2000022	0tbjDbteANdkRHp66I	2000022	IRF9	interferon regulatory factor 9	-0.518252	11.0293	0.000472144	0.0227129	11.4336	10.9721				1410037	BRIt.oJSS25XWzHtR0	1410037	PIP4K2A	phosphatidylinositol-5-phosphate 4-kinase, type II, alpha	-0.456755	9.81384	7.85216e-06	0.00237722	9.67452	9.44614
		5270132	xm60reewT9UUHd_e1E	5270132	CBLB	Cbl proto-oncogene B, E3 ubiquitin protein ligase	-0.660441	9.29569	9.18189e-09	2.12739e-06	9.64207	8.98162				2690390	Tt5huq2hqZcdZqzRSc	2690390	HCG4	HLA complex group 4 (non-protein coding)	-0.51761	10.5825	0.000180283	0.0117293	10.9501	10.4311				1410408	ltS76e8uz_M95e3XTo	1410408	ARID5B	AT rich interactive domain 5B (MRF1-like)	-0.454903	11.3745	6.61724e-06	0.00211621	11.1502	10.9228
		4570441	T03kDulKfqgQ465ECk	4570441	IFIH1	interferon induced with helicase C domain 1	-0.658837	7.79964	6.52861e-05	0.00231985	8.32339	7.66456				2710064	fVSZEVPRHRlBHdngR8	2710064	NA	NA	-0.517593	11.3435	0.000341509	0.0180333	11.7757	11.1104				6580689	NXSh_QAat0k5fVIlOI	6580689	ARSD	arylsulfatase D	-0.454582	8.80802	1.84005e-05	0.00432521	8.71069	8.4834
		650458	imM9It1UhaS006S.SY	650458	FILIP1L	filamin A interacting protein 1-like	-0.658364	8.31612	3.67646e-07	3.84689e-05	8.56016	7.9018				3400019	KeS7W84uUAN7fgpJxE	3400019	RGS2	regulator of G-protein signaling 2, 24kDa	-0.516887	9.96749	0.000377347	0.0194287	10.2837	9.7523				6510608	Ke0X111R97NdIjnm6M	6510608	BTBD11	BTB (POZ) domain containing 11	-0.450802	10.1775	6.43753e-06	0.00208815	9.98522	9.75982
		3800168	cf3p10BLK_ksKSrVP0	3800168	SLC2A3	solute carrier family 2 (facilitated glucose transporter), member 3	-0.65753	11.2741	1.97165e-06	0.000145351	11.7516	11.0941				1740497	r_dQ6fDuAJ15Iwuhe0	1740497	RAB8B	RAB8B, member RAS oncogene family	-0.516443	8.33024	1.58916e-05	0.0019296	8.59876	8.15144				1400634	QRltaupcktnU.Nn4jc	1400634	MT1M	metallothionein 1M	-0.447156	12.1579	0.000251009	0.0284892	12.0959	11.8723
		3870500	QZXtSkcinV_G.pI4AE	3870500	FOXD1	forkhead box D1	-0.652384	9.85484	3.27286e-08	5.58748e-06	10.1218	9.46942				2900450	ir7h1CJIuKCFVCTIdo	2900450	ADAR	adenosine deaminase, RNA-specific	-0.516006	11.4011	1.40394e-05	0.00179089	11.7596	11.2817				6550196	lqPf8lfhPftVQF7Cys	6550196	CRK	v-crk avian sarcoma virus CT10 oncogene homolog	-0.443596	9.67786	0.00032339	0.0339059	9.61505	9.39325
		1820592	ipWbdgqkXuB0Ap3.SI	1820592	HIST2H2AA3	histone cluster 2, H2aa3	-0.647989	8.06641	0.000223074	0.00583538	8.53614	7.88815				1990079	lgq1V54eiJ6gzpP6Ec	1990079	FBXO32	F-box protein 32	-0.50435	10.7079	3.18992e-06	0.000629828	11.0707	10.6345				6480630	6eJh3H9Pv5Sbp2_e_U	6480630	ATP9A	ATPase, class II, type 9A	-0.439676	9.98649	4.06208e-05	0.00749867	9.86193	9.64209
		7210093	xiUdCQh3n3Ozril__8	7210093	PGM2L1	phosphoglucomutase 2-like 1	-0.64337	7.76619	2.78906e-08	4.9865e-06	8.08588	7.44251				6840035	Nk_t6ULcQ7VDNChBRU	6840035	GBP1	guanylate binding protein 1, interferon-inducible	-0.495904	7.99324	0.000457035	0.0221267	8.33287	8.01122				5420398	iV7oPQVQfbpmzjFwLo	5420398	TRMT112	tRNA methyltransferase 11-2 homolog (S. cerevisiae)	-0.439244	10.802	1.99446e-05	0.00446984	10.6768	10.4572
		380019	KJ1Ar0e795Z7XovtFE	380019	DDIT4L	DNA-damage-inducible transcript 4-like	-0.642213	10.6471	1.58837e-06	0.000123751	10.8779	10.2357				1660736	9mt0pQ8e6JJ.T1xUfk	1660736	ATP6V1D	ATPase, H+ transporting, lysosomal 34kDa, V1 subunit D	-0.49526	10.401	8.83861e-07	0.000244743	10.6731	10.2777				1050750	0Ru4E3t_tEiernlrRc	1050750	CLPTM1L	CLPTM1-like	-0.436081	10.5591	4.15502e-06	0.00154662	10.4719	10.2538
		4490709	HOQnslJXuIXlJX0kUc	4490709	FILIP1L	filamin A interacting protein 1-like	-0.640561	8.49517	2.50899e-06	0.000176375	8.76343	8.12287				1980592	QjIAoqJx3SnkJpBLlQ	1980592	HLA-H	major histocompatibility complex, class I, H (pseudogene)	-0.493784	8.9197	1.76367e-05	0.00205363	9.29613	8.8193				3120228	ETe7o7Q4QQXp8XopT0	3120228	AP2S1	adaptor-related protein complex 2, sigma 1 subunit	-0.434367	11.031	0.000489807	0.044309	10.867	10.6498
		5360154	o7tElIqEC7q416IZS8	5360154	ZDHHC7	zinc finger, DHHC-type containing 7	-0.633639	10.288	1.63546e-09	4.89371e-07	10.4118	9.77816				4730392	ZPwXFJX3VUMHutzEi0	4730392	MYL12A	myosin, light chain 12A, regulatory, non-sarcomeric	-0.490639	12.7111	7.75425e-05	0.00647309	12.8756	12.6739				3800465	fK5_UetekgOmnngLhc	3800465	FAM174B	family with sequence similarity 174, member B	-0.430653	8.27293	3.21716e-05	0.00632313	8.09982	7.8845
		1740746	NoHuDMfXgqiogqKCdU	1740746	PLK2	polo-like kinase 2	-0.630747	8.47156	6.73744e-06	0.000394279	8.87149	8.24074				290730	i7o1RUDUHTXr_eRHr0	290730	HIST1H2BD	histone cluster 1, H2bd	-0.476383	9.15582	0.000226771	0.0137308	9.65439	8.99276				5090671	QWq7Z1IXOOH7yUCHlE	5090671	GDF15	growth differentiation factor 15	-0.430269	10.0197	0.000169927	0.0207299	9.849	9.63386
		2900187	WN4cuoB9Or9dN7Ttjg	2900187	CNIH1	cornichon family AMPA receptor auxiliary protein 1	-0.628801	10.4853	1.06341e-07	1.46338e-05	10.4873	9.85847				6620121	TtPvdXXF7ey77qtdU4	6620121	CCL8	chemokine (C-C motif) ligand 8	-0.475356	7.66265	0.000907158	0.0357603	8.02497	7.51603				5810373	TTVSIXfu9eUTJ5Sp8I	5810373	FAM127B	family with sequence similarity 127, member B	-0.429045	9.27417	6.83313e-06	0.0021549	9.17362	8.9591
		4860224	6KSl0.TRkk7kpegiQI	4860224	WARS	tryptophanyl-tRNA synthetase	-0.62798	11.133	8.22619e-07	7.50136e-05	11.3044	10.6764				7000368	W2teeilGrlER2tWE44	7000368	UBE2L6	ubiquitin-conjugating enzyme E2L 6	-0.471538	8.97483	0.000498753	0.0237914	9.37251	8.85321				110307	WeFGdFdNS1MeM._QoE	110307	FILIP1L	filamin A interacting protein 1-like	-0.428806	8.73313	7.84982e-05	0.0116495	8.57257	8.35817
		1470382	cl2ge4RVTfYfSLffUI	1470382	IRF7	interferon regulatory factor 7	-0.62699	7.99257	7.70552e-05	0.0026671	8.50665	7.87966				5570279	ZunCJUCClCvmCVCAnk	5570279	HIST1H1C	histone cluster 1, H1c	-0.471157	9.41115	2.74762e-05	0.00290562	9.75432	9.31079				4860358	ZV7oCccsT4UmerjEj0	4860358	VBP1	von Hippel-Lindau binding protein 1	-0.428592	9.34932	7.73706e-06	0.00237402	9.19738	8.98309
		4480600	r3kCqbknnu3juqEnfc	4480600	MT1P3	metallothionein 1 pseudogene 3	-0.626905	10.2214	8.22534e-07	7.50136e-05	10.6545	10.0276				4610520	K0vg5eesn.U97onlvU	4610520	GCNT3	glucosaminyl (N-acetyl) transferase 3, mucin type	-0.471111	7.59302	1.81042e-06	0.00042089	7.9988	7.41461				520682	ZlekT1T_57rs17v1_0	520682	CPA4	carboxypeptidase A4	-0.428323	11.2716	0.000151586	0.0191217	11.3084	11.0943
		2140242	TY47U6f7qCMe6I4n1I	2140242	TNFAIP6	tumor necrosis factor, alpha-induced protein 6	-0.626526	11.1597	2.49876e-06	0.000176201	11.3614	10.7348				5490433	0Svv6Xd61N_pPK91JI	5490433	ADAR	adenosine deaminase, RNA-specific	-0.46961	9.70035	0.00100624	0.0386593	10.0202	9.66371				2260477	TlzuclRAgz7dPJeDuU	2260477	PTGS2	prostaglandin-endoperoxide synthase 2 (prostaglandin G/H synthase and cyclooxygenase)	-0.426983	7.90228	0.000187452	0.0222842	7.77841	7.56492
		6980010	3qL.LbKXzjDxVmuu7I	6980010	MED28	mediator complex subunit 28	-0.626054	9.2602	1.51027e-07	1.93741e-05	9.48498	8.85893				3420632	oLUKIIIpcl4lAiIsak	3420632	PSMB8	proteasome (prosome, macropain) subunit, beta type, 8	-0.469233	8.68469	7.69187e-05	0.00644471	8.91913	8.55116				4490709	HOQnslJXuIXlJX0kUc	4490709	FILIP1L	filamin A interacting protein 1-like	-0.426965	8.49517	0.000411378	0.0393363	8.33635	8.12287
		4070044	WtVe_sT_vF0.5b9I_4	4070044	RNF38	ring finger protein 38	-0.625048	8.64307	5.41534e-08	8.65921e-06	8.89592	8.27087				2480577	Z994OdWBx4f4IrJdeU	2480577	PDE4B	phosphodiesterase 4B, cAMP-specific	-0.468441	10.4284	8.92885e-06	0.00126032	10.7728	10.2436				7380634	QpZVLnjojlH9u4eYE8	7380634	MRGBP	MRG/MORF4L binding protein	-0.425912	9.19232	1.41187e-06	0.000678468	9.01157	8.79862
		5910338	igd57UpHn6fHNUkCHk	5910338	TMEM203	transmembrane protein 203	-0.619824	9.77165	1.35407e-08	2.985e-06	9.95458	9.33476				5270112	BlpDqSl5Ax6RIk8NMQ	5270112	HMGCS1	3-hydroxy-3-methylglutaryl-CoA synthase 1 (soluble)	-0.461064	8.98896	1.38308e-05	0.00177425	9.06737	8.92029				670463	WunPH_9_tfRKl51NUU	670463	AK3	adenylate kinase 3	-0.421889	10.184	4.59805e-05	0.00815651	9.99729	9.78635
		110181	NkGdd4Dn7f.3vlgMno	110181	KIAA1199	KIAA1199	-0.619408	11.7441	1.3222e-06	0.000107992	11.6234	11.004				4780224	BJIHip6jPXTrpJnTJg	4780224	STMN3	stathmin-like 3	-0.460435	8.75412	4.16312e-05	0.00395514	9.09062	8.59994				70121	lSQl7o6IcSqM6ikqCI	70121	NA	NA	-0.41963	7.75125	0.000108846	0.0149785	7.64761	7.43779
		6270373	xiBIDLpPk5UkI2pXxU	6270373	MCUR1	mitochondrial calcium uniporter regulator 1	-0.617592	8.76405	4.19895e-06	0.000267813	8.83087	8.21328				5220070	Bzkii9KFxeipi5ei_c	5220070	HLA-F	major histocompatibility complex, class I, F	-0.460419	8.72874	0.000165317	0.0110403	9.06178	8.58067				7570358	Tf6QkorhHI6e4O41nQ	7570358	NPC1	Niemann-Pick disease, type C1	-0.419222	10.4218	9.15166e-06	0.00263035	10.3721	10.1625
		4900520	lpI4BStHqi3n0.XeJ4	4900520	SCG2	secretogranin II	-0.616467	8.63103	1.81608e-07	2.21699e-05	9.12386	8.5074				1510193	6egQlQDgeLl6C.GXjI	1510193	WTAP	Wilms tumor 1 associated protein	-0.458474	9.05919	0.000235097	0.014122	9.43678	8.93854				3710068	BLXpdZI59P_Ffp5LoI	3710068	WARS	tryptophanyl-tRNA synthetase	-0.417902	10.0834	2.31134e-05	0.00495106	9.7532	9.54425
		2760537	0W6nuULuVKju.kCoTc	2760537	MT1IP	metallothionein 1I, pseudogene	-0.61433	11.4437	1.27752e-06	0.00010472	11.8923	11.278				1580561	uqElee0jgBIOEbANYo	1580561	MT1H	metallothionein 1H	-0.45749	8.09549	2.31621e-05	0.00259073	8.58763	7.96522				2450187	3NRFCKu_44rlruQKgc	2450187	GPD1L	glycerol-3-phosphate dehydrogenase 1-like	-0.416882	7.80379	3.44183e-06	0.0013025	7.69012	7.48167
		6510408	6993jqamKu727jq_i4	6510408	FRMD8	FERM domain containing 8	-0.613921	9.63615	2.17786e-06	0.000156985	9.88312	9.2692				3060273	KSeeUuIKRV1u6JG6Iw	3060273	MT3	metallothionein 3	-0.45476	7.27512	1.15728e-05	0.00155486	7.71541	7.25137				3780554	NqAI5QBO1XRUpwH4x4	3780554	CRBN	cereblon	-0.415615	8.74514	2.88273e-05	0.00579251	8.51812	8.31031
		2900747	i6SQgrik0qBqDSnqHg	2900747	C10orf10	chromosome 10 open reading frame 10	-0.613893	11.9363	1.89147e-08	3.73458e-06	12.2322	11.6183				2490577	EDUn7DWVAJpJQ2iZig	2490577	PLEKHA4	pleckstrin homology domain containing, family A (phosphoinositide binding specific) member 4	-0.452002	9.15542	4.85997e-06	0.000858209	9.41523	8.96689				7380601	ijKPXwjvFFSqlEJSXk	7380601	ERMP1	endoplasmic reticulum metallopeptidase 1	-0.413828	7.84152	6.27268e-06	0.00208815	7.7856	7.57869
		670463	WunPH_9_tfRKl51NUU	670463	AK3	adenylate kinase 3	-0.612911	10.184	2.0449e-07	2.44377e-05	10.3993	9.78635				20241	EdV._eEEe7E_FH1xTE	20241	SLC7A1	solute carrier family 7 (cationic amino acid transporter, y+ system), member 1	-0.450702	9.67825	5.37338e-05	0.00480347	9.82552	9.5838				4230626	r_nlt6Wp3TrH13uB7s	4230626	PRKCD	protein kinase C, delta	-0.411734	8.80085	5.94072e-06	0.00201328	8.69427	8.4884
		6480059	uR.XnXd7dyREHuDte4	6480059	ACTA2	actin, alpha 2, smooth muscle, aorta	-0.60713	10.0999	4.41977e-08	7.32521e-06	10.1551	9.54801				4850494	o3aWaFalm7iZn_Rdc0	4850494	NA	NA	-0.450047	9.92865	0.000327556	0.0176066	10.2555	9.87285				2650730	WUCfbfu.nki49qp4XI	2650730	STC1	stanniocalcin 1	-0.411605	9.09082	0.000554545	0.048145	8.78847	8.58267
		3360224	rQhICISiE4t.looAkk	3360224	MMP1	matrix metallopeptidase 1 (interstitial collagenase)	-0.606082	11.3624	0.000150205	0.00431715	11.5906	10.9845				3290292	lUECOC9XNxoCk4eopU	3290292	LAP3	leucine aminopeptidase 3	-0.44929	9.11042	0.000734444	0.0312823	9.42147	9.02195				3190379	c5OkDXtrdS_vN4Mu0U	3190379	TGFBR3	transforming growth factor, beta receptor III	-0.410227	9.37094	0.000247303	0.0283599	9.24403	9.03891
		430196	0npT50gf7uL4lSl3r4	430196	MRPL14	mitochondrial ribosomal protein L14	-0.604945	10.3985	5.38444e-08	8.65921e-06	10.6026	9.99769				2760537	0W6nuULuVKju.kCoTc	2760537	MT1IP	metallothionein 1I, pseudogene	-0.446041	11.4437	9.7626e-05	0.00751422	11.8923	11.3621				3870594	NX9EfunjuDnhYBOiNU	3870594	IFI16	interferon, gamma-inducible protein 16	-0.40893	8.59224	0.000471868	0.0433775	8.43047	8.22601
		2070170	3XUk9LUqolGgFO9_fA	2070170	UBE2L6	ubiquitin-conjugating enzyme E2L 6	-0.60438	11.2087	0.000172429	0.00480389	11.674	11.0697				6110630	WVHqq_qwz3utdJXsXw	6110630	HIST1H2BK	histone cluster 1, H2bk	-0.446009	10.8934	0.000865682	0.0349754	11.1568	10.7922				6560017	KC1J.AOeT5.qUieyXo	6560017	GLIS3	GLIS family zinc finger 3	-0.405321	9.69607	2.55204e-05	0.00531621	9.55463	9.35197
		110307	WeFGdFdNS1MeM._QoE	110307	FILIP1L	filamin A interacting protein 1-like	-0.60179	8.73313	7.18999e-07	6.71835e-05	8.95996	8.35817				5900725	9BLd1lWRSNCy.oTRXE	5900725	PHLDA1	pleckstrin homology-like domain, family A, member 1	-0.443334	11.642	6.96501e-06	0.00108253	12.0992	11.5988				3130220	EgX.UL43NS4bpeupv0	3130220	TMEM158	transmembrane protein 158 (gene/pseudogene)	-0.404013	7.62019	5.68187e-05	0.00924145	7.46619	7.26419
		1410408	ltS76e8uz_M95e3XTo	1410408	ARID5B	AT rich interactive domain 5B (MRF1-like)	-0.600114	11.3745	8.95724e-08	1.30848e-05	11.5229	10.9228				1110373	Bgi_QDtQKuFA4Yldl0	1110373	C15orf48	chromosome 15 open reading frame 48	-0.442917	10.8834	8.34295e-06	0.00121086	11.2424	10.8392				5810746	6e6EQfn3l015fLuQ3Q	5810746	MATN2	matrilin 2	-0.400676	9.27619	1.55447e-05	0.00400107	9.11185	8.91151
		5890241	6dUoDtfd6beflfeLeU	5890241	ZFYVE26	zinc finger, FYVE domain containing 26	-0.598203	8.98711	1.03708e-06	8.78655e-05	9.22621	8.62801				2650730	WUCfbfu.nki49qp4XI	2650730	STC1	stanniocalcin 1	-0.438789	9.09082	0.000286362	0.0160546	9.43307	8.78847				5360424	fkk3u29x4kZ93l2deE	5360424	RPS6KA2	ribosomal protein S6 kinase, 90kDa, polypeptide 2	-0.397567	9.54926	5.69807e-05	0.00924145	9.46164	9.26286
		6040626	fXJXr.6XX.57RSbZvU	6040626	CA9	carbonic anhydrase IX	-0.593554	8.94537	3.85593e-07	4.01618e-05	9.33778	8.74423				2650564	opRpn6DXr756Od.5jw	2650564	RARRES3	retinoic acid receptor responder (tazarotene induced) 3	-0.436791	10.1464	0.000173387	0.0114114	10.4278	10.019				6290435	f6o16VdBde6BUkve8w	6290435	USP4	ubiquitin specific peptidase 4 (proto-oncogene)	-0.396373	8.31062	2.6857e-05	0.00544477	8.17873	7.98055
		770541	iRwF4H.Qdb666ikmpI	770541	EI24	etoposide induced 2.4	-0.592144	10.3847	2.15415e-07	2.50831e-05	10.5046	9.91243				4010086	NeZfUgkrVAwJS5UXgA	4010086	OSGIN1	oxidative stress induced growth inhibitor 1	-0.434976	8.59703	9.23503e-05	0.00718119	8.95423	8.5328				3420288	KLl5qhKHur9_tEXu_s	3420288	PDPN	podoplanin	-0.39613	12.202	0.000217379	0.0255741	12.0563	11.8583
		4540593	cih1cgkjvlGfXMyXuI	4540593	SLC19A3	solute carrier family 19 (thiamine transporter), member 3	-0.590989	8.70677	1.36664e-06	0.000111222	8.93155	8.34056				630091	WeyXq7G.R0L3XHih34	630091	NCOA7	nuclear receptor coactivator 7	-0.434084	8.9312	0.00140785	0.0487295	9.31218	8.73821				4780086	cXBw6jUkqU.dSKlLNc	4780086	CRK	v-crk avian sarcoma virus CT10 oncogene homolog	-0.39612	9.27105	0.000260777	0.0288839	9.18688	8.98882
		6560017	KC1J.AOeT5.qUieyXo	6560017	GLIS3	GLIS family zinc finger 3	-0.590955	9.69607	8.90993e-08	1.30848e-05	9.94292	9.35197				6590594	33obrCQopAnZlAmA1Y	6590594	HIST1H2AC	histone cluster 1, H2ac	-0.432347	8.55375	4.2767e-05	0.0040137	8.96398	8.38274				240309	N1HteUKxF0sdV9UHgs	240309	CTSB	cathepsin B	-0.39581	10.7378	0.000408581	0.0393103	10.7356	10.5377
		2480577	Z994OdWBx4f4IrJdeU	2480577	PDE4B	phosphodiesterase 4B, cAMP-specific	-0.589949	10.4284	2.75849e-07	3.01126e-05	10.7728	10.1829				1940605	lf5Lnd3uek.CaIdjpU	1940605	WRAP73	WD repeat containing, antisense to TP73	-0.431195	8.47857	1.72876e-05	0.0020274	8.64748	8.39805				4920379	Bnsku19NSoLw6LfoV8	4920379	NA	NA	-0.389562	8.37216	0.000396113	0.0384365	8.22268	8.0279
		3130301	fr1fXPUJ9TJ55XL.f0	3130301	PIM1	pim-1 oncogene	-0.589491	8.13348	1.59144e-06	0.000123751	8.51038	7.92089				6860719	ul690Lv1yEiKRerSzw	6860719	CYTH1	cytohesin 1	-0.430144	9.01897	6.37475e-06	0.00103074	9.3619	9.00369				3190592	EH07iSk6rdXiJ4wWoA	3190592	NA	NA	-0.388424	8.71034	1.92817e-05	0.0043781	8.63642	8.44221
		7200398	3M5JGKp5CJV0V4nqJQ	7200398	HLA-C	major histocompatibility complex, class I, C	-0.585805	8.46899	1.44293e-06	0.000115363	8.85782	8.27201				6650541	HohZok1CB6CcLMZ5ro	6650541	SP100	SP100 nuclear antigen	-0.428917	7.91881	5.99379e-06	0.0010007	8.24243	7.81518				630601	9KihUR5xH3jVf6.xxU	630601	37500	septin 2	-0.386674	12.0467	1.00846e-05	0.00282693	11.9261	11.7328
		4890270	fSohbtLKju5enuxurs	4890270	LY6E	lymphocyte antigen 6 complex, locus E	-0.585732	11.8466	0.000804905	0.0153581	12.4551	11.8694				2750025	xkjTf4ske.6pXa3d4I	2750025	PEX19	peroxisomal biogenesis factor 19	-0.427796	8.58686	2.57594e-05	0.00283929	8.80012	8.45413				1990468	W8fn_kwIOJQ4F3u17o	1990468	ADD3	adducin 3 (gamma)	-0.385	7.95556	3.96313e-05	0.00737597	7.78218	7.58968
		2490537	E6TRKkiWoJjg.oh3uo	2490537	TNFRSF1B	tumor necrosis factor receptor superfamily, member 1B	-0.585729	8.98374	1.64105e-05	0.000803056	9.13372	8.54799				1400634	QRltaupcktnU.Nn4jc	1400634	MT1M	metallothionein 1M	-0.425904	12.1579	0.000419635	0.0208796	12.7453	12.0959				6370661	flMJt7m6LVQwF7rXl4	6370661	AP2S1	adaptor-related protein complex 2, sigma 1 subunit	-0.384574	12.6967	6.65433e-05	0.0103489	12.5967	12.4044
		5420564	HR0Ih8yURBQ3efSHeo	5420564	NFIL3	nuclear factor, interleukin 3 regulated	-0.58426	9.28814	8.2665e-07	7.50796e-05	9.58904	9.00478				6100521	fctt136XSSd9XvfHr4	6100521	PHF11	PHD finger protein 11	-0.424414	10.5656	3.67115e-05	0.00353209	10.8688	10.4662				360192	QUUtJIOgnyKB_XuJno	360192	INSIG1	insulin induced gene 1	-0.384449	10.7797	0.000146733	0.0187175	10.6535	10.4613
		4070088	EQOCo9zUkI17UIsl7o	4070088	CNIH1	cornichon family AMPA receptor auxiliary protein 1	-0.580234	10.3065	7.98489e-06	0.00045554	10.2658	9.68558				770187	HuB6Fe_cJ1pCQ01yso	770187	NA	NA	-0.422639	8.62386	0.000960262	0.0372713	8.9454	8.53722				1400592	TZeN.gBHESp57R9UqU	1400592	LRRC32	leucine rich repeat containing 32	-0.384232	8.29463	0.000372049	0.0372148	8.1399	7.94778
		6650164	Tlmcdek7o0UIxD9614	6650164	NA	NA	-0.578103	8.76218	2.78665e-08	4.9865e-06	8.97728	8.39918				130519	TpXkSunv37e87SKBLU	130519	STAT2	signal transducer and activator of transcription 2, 113kDa	-0.421005	11.4906	8.21836e-05	0.00670909	11.8103	11.3536				430196	0npT50gf7uL4lSl3r4	430196	MRPL14	mitochondrial ribosomal protein L14	-0.382351	10.3985	4.94764e-05	0.00854359	10.1889	9.99769
		4640445	oqjgg.l8f5UvXCHuL4	4640445	AIDA	axin interactor, dorsalization associated	-0.576914	9.66635	6.45626e-07	6.13372e-05	9.5982	9.02129				1510196	0R3_RHfu..nR7RPVJE	1510196	PHF11	PHD finger protein 11	-0.420722	10.2196	9.85112e-05	0.00755674	10.5112	10.1238				5490612	Zov8vJoLS9Kk.yp7fk	5490612	ARHGAP12	Rho GTPase activating protein 12	-0.380192	7.79078	0.000459669	0.042601	7.69571	7.50562
		1070754	iuXtF7fR5df9XtOdNI	1070754	CAP1	CAP, adenylate cyclase-associated protein 1 (yeast)	-0.574664	11.5076	3.75336e-06	0.000247025	11.6703	11.0956				160274	ugqXsXVxS4XrtfP3Fk	160274	NA	NA	-0.417974	7.59191	7.79832e-05	0.0064847	7.84727	7.48154				5270132	xm60reewT9UUHd_e1E	5270132	CBLB	Cbl proto-oncogene B, E3 ubiquitin protein ligase	-0.377112	9.29569	5.01326e-05	0.00855873	9.17018	8.98162
		1990092	BiSop96y534517t6_k	1990092	CYB561D1	cytochrome b561 family, member D1	-0.572811	8.73637	4.82778e-07	4.78688e-05	8.98324	8.41043				730164	Qq7CX0l6QvE7ICVEfs	730164	SLC40A1	solute carrier family 40 (iron-regulated transporter), member 1	-0.41786	9.62759	0.000237946	0.0142179	9.9507	9.70404				2140630	Tukq7v7qou9HrHfi6U	2140630	GLE1	GLE1 RNA export mediator	-0.375568	8.97819	0.00035558	0.0360438	8.83545	8.64767
		7570576	9IihNNBtcSiFS9LnSo	7570576	PRUNE2	prune homolog 2 (Drosophila)	-0.571839	8.45935	5.74479e-05	0.00209713	8.66306	8.09122				580601	uuolsd.lfeeO3N07e4	580601	PIGC	phosphatidylinositol glycan anchor biosynthesis, class C	-0.409873	9.1498	6.79662e-05	0.00586784	9.32393	9.03481				1300671	xKJf1Lzfi_Sd7L9_KU	1300671	NCOA4	nuclear receptor coactivator 4	-0.373331	11.6369	0.000161946	0.0200937	11.5281	11.3415
		5130091	To0eg1I2JkvTkQpVvg	5130091	DICER1	dicer 1, ribonuclease type III	-0.568565	8.56175	0.000141344	0.00413576	8.93758	8.36901				3940762	fep1FPXB1KyEIyO0RE	3940762	APH1B	APH1B gamma secretase subunit	-0.407588	8.81237	9.8832e-06	0.00135185	9.16196	8.75818				780168	cUnv1Ree5LRfI70glk	780168	ISCU	iron-sulfur cluster assembly enzyme	-0.372124	11.0105	5.77353e-05	0.00926195	10.843	10.6569
		4220672	QeeYeOUoQX91SOwEiI	4220672	MT1F	metallothionein 1F	-0.568112	12.9085	9.2973e-06	0.000516148	13.2214	12.6533				3400450	Qfoc5Ut2vUvcfUkgqk	3400450	CHKB	choline kinase beta	-0.405568	9.36373	3.51026e-06	0.000670694	9.65722	9.27408				3930367	0nXq9CyzxRX9EJBId0	3930367	DAB2	Dab, mitogen-responsive phosphoprotein, homolog 2 (Drosophila)	-0.372024	11.6106	0.000552908	0.048145	11.4464	11.2604
		2070059	op3vv4MBuBuBUpoKhU	2070059	PARP10	poly (ADP-ribose) polymerase family, member 10	-0.56782	8.42473	0.000500646	0.0109075	8.87045	8.30263				4230021	cbfiOkT1xj4IKrfiNU	4230021	NCK2	NCK adaptor protein 2	-0.404972	9.43766	0.000868309	0.0350192	9.6876	9.34461				4290037	l4pUCR_fE13jJ79A7k	4290037	NOV	nephroblastoma overexpressed	-0.371641	9.99581	0.000495242	0.0446229	9.78144	9.59562
		7000368	W2teeilGrlER2tWE44	7000368	UBE2L6	ubiquitin-conjugating enzyme E2L 6	-0.567061	8.97483	6.40773e-05	0.00228764	9.37251	8.80545				4760324	KpekLq4COgfnni5FH0	4760324	NOS2	nitric oxide synthase 2, inducible	-0.402992	8.50537	3.58847e-05	0.00346722	8.81768	8.40214				1660047	WVONp1S5FV8KsJKUTM	1660047	SNX29	sorting nexin 29	-0.371338	7.68898	5.41328e-06	0.00192053	7.59537	7.4097
		1090747	ER7He6kKOrUghVH0pE	1090747	TNFSF12	tumor necrosis factor (ligand) superfamily, member 12	-0.565375	8.45025	3.40121e-07	3.64282e-05	8.50098	7.93561				3800398	Kh15Vr0FcUn7rB8e0Q	3800398	FBXO6	F-box protein 6	-0.40258	8.13145	0.000369624	0.0192493	8.36156	8.03935				3870543	rtyX5WJ.XxDSJV3Rfs	3870543	PUM1	pumilio RNA-binding family member 1	-0.370851	10.5079	9.56459e-05	0.0136587	10.4112	10.2258
		5960747	BhFLTHp0qVFnDl8OA0	5960747	TRIM22	tripartite motif containing 22	-0.5643	7.62128	0.000165872	0.00467863	7.95694	7.39264				5080021	uUov4NTXqSTHiFeX8A	5080021	BIRC3	baculoviral IAP repeat containing 3	-0.401685	8.64898	0.000537943	0.0251846	8.99551	8.53681				6620397	BVAAoikiCA4ldXaYJc	6620397	ISCU	iron-sulfur cluster assembly enzyme	-0.370573	9.37555	0.000102104	0.0142562	9.18134	8.99606
		1400446	WFCuSI6EIklKIVJjeI	1400446	PLIN2	perilipin 2	-0.56399	10.2964	2.18652e-07	2.52016e-05	10.5521	9.98806				6560075	3tH0U0E9eVSOn_49XU	6560075	TRIM21	tripartite motif containing 21	-0.400568	8.25982	0.00124733	0.044813	8.59921	8.16432				4180079	3Gm9endeVEo4E.2n18	4180079	CRISPLD2	cysteine-rich secretory protein LCCL domain containing 2	-0.368866	9.20551	5.79229e-05	0.00926195	9.08235	8.89792
		3780554	NqAI5QBO1XRUpwH4x4	3780554	CRBN	cereblon	-0.563029	8.74514	3.50157e-07	3.71261e-05	8.87334	8.31031				1510608	0576touUtHn_gt7veo	1510608	ZMAT3	zinc finger, matrin-type 3	-0.400482	9.2739	0.000113358	0.00841144	9.4608	8.98368				6290059	iDpdN157X2JtWnsUOg	6290059	ACOT2	acyl-CoA thioesterase 2	-0.367693	8.8293	0.000257906	0.0287112	8.84666	8.66281
		4280202	NjuS6jJK0vjfeSgrkk	4280202	NA	NA	-0.560797	10.1566	3.4937e-06	0.000233317	10.2658	9.70505				6370500	TXVRJtLgLbX7dIOFKo	6370500	AGRN	agrin	-0.399319	8.28965	0.000927856	0.0361991	8.60079	8.21885				1400446	WFCuSI6EIklKIVJjeI	1400446	PLIN2	perilipin 2	-0.367274	10.2964	9.46521e-05	0.013631	10.1717	9.98806
		1780619	fR1MSzyuKOjmpntflo	1780619	EHD1	EH-domain containing 1	-0.560375	9.37859	4.47806e-06	0.000281659	9.52498	8.96461				2680670	9qIANVn5wOMcBb7_p0	2680670	FNIP2	folliculin interacting protein 2	-0.399098	7.78031	0.000667842	0.0291351	8.09724	7.62068				1190035	6Jehe6mLVPp6nel40c	1190035	CECR5	cat eye syndrome chromosome region, candidate 5	-0.363264	7.87038	6.83727e-05	0.0104193	7.7864	7.60477
		4540398	crU3qCaj_r44ogOkUk	4540398	BEND5	BEN domain containing 5	-0.559643	9.17246	3.26357e-05	0.00135968	9.60507	9.04542				3870504	3_J5a9mL2KUr1l7bq8	3870504	ARRDC2	arrestin domain containing 2	-0.397749	7.89175	3.09265e-05	0.00313683	8.21346	7.79825				130093	3fdn6gdS3Rdp_Q6FUE	130093	MT1H	metallothionein 1H	-0.363122	12.9746	0.000284806	0.0309417	12.8884	12.7069
		6330132	ZSVvWSocin9p._oSQc	6330132	ISG20	interferon stimulated exonuclease gene 20kDa	-0.55956	10.0435	0.00219605	0.0322315	10.3706	9.81101				5390161	BdXlXor7fQnuh96j_Q	5390161	DUSP5	dual specificity phosphatase 5	-0.395921	7.89265	2.85256e-05	0.00295754	8.29279	7.75417				830278	TknXgre75HtFLdCc5c	830278	GLIPR2	GLI pathogenesis-related 2	-0.360743	8.18693	8.97171e-05	0.0130584	8.06776	7.88739
		4810187	ikRLn9bpHkxDeKXXd0	4810187	STAT1	signal transducer and activator of transcription 1, 91kDa	-0.55913	11.6125	0.000135714	0.00402815	12.1113	11.5522				6940605	ilVw_Hg6BV34UC4VSA	6940605	TRIM69	tripartite motif containing 69	-0.394684	7.77398	0.00020927	0.0130834	7.99743	7.63995				3370202	ZgtzjsBH_XXux7tMBo	3370202	ANXA2P1	annexin A2 pseudogene 1	-0.35929	10.6652	0.000257953	0.0287112	10.5748	10.3951
		4280577	o_6dVarNGX.HlGiDlc	4280577	BMP2	bone morphogenetic protein 2	-0.55843	9.84405	3.72863e-05	0.00151776	10.1665	9.6081				7200398	3M5JGKp5CJV0V4nqJQ	7200398	HLA-C	major histocompatibility complex, class I, C	-0.394353	8.46899	0.000250972	0.01484	8.85782	8.36774				6250192	Zl7s26IBCIUH.09XlU	6250192	COL6A3	collagen, type VI, alpha 3	-0.353512	12.7628	0.000105285	0.0145768	12.707	12.5302
		5900725	9BLd1lWRSNCy.oTRXE	5900725	PHLDA1	pleckstrin homology-like domain, family A, member 1	-0.557567	11.642	2.10903e-07	2.48122e-05	12.0992	11.5416				2510523	ciUoKIeRL.gJElbStY	2510523	RBCK1	RanBP-type and C3HC4-type zinc finger containing 1	-0.389091	9.84606	0.000465283	0.0224304	10.062	9.76512				430400	Bu0nKwI4QHle3pLSfU	430400	GLT8D1	glycosyltransferase 8 domain containing 1	-0.353312	9.27601	4.55533e-05	0.00814436	9.11235	8.9357
		6270646	TXm4UjVovoAQ4ApVQo	6270646	MYC	v-myc avian myelocytomatosis viral oncogene homolog	-0.556204	9.70729	1.93646e-06	0.000143444	9.9779	9.4217				130093	3fdn6gdS3Rdp_Q6FUE	130093	MT1H	metallothionein 1H	-0.388664	12.9746	0.000134169	0.00949044	13.4587	12.8884				4900465	Q5FmV6Lfc2dU203_TU	4900465	RUVBL1	RuvB-like 1 (E. coli)	-0.35102	8.32735	0.000170725	0.0207299	8.25866	8.08315
		7400091	ciUL0RR5T9depBIuIU	7400091	HTR2A	5-hydroxytryptamine (serotonin) receptor 2A, G protein-coupled	-0.555174	7.85176	1.39723e-06	0.000112616	8.05977	7.5046				6620538	ll4OOJc7V5cEeu3R00	6620538	UBL3	ubiquitin-like 3	-0.386844	9.42511	0.000497699	0.0237911	9.63065	9.32071				2030292	NLnrgCsqeLjxfJRKuk	2030292	EDEM1	ER degradation enhancer, mannosidase alpha-like 1	-0.350464	8.63514	3.9276e-05	0.00737597	8.53434	8.35911
		1030333	cSj1OhRehCQFQHWCH4	1030333	CCL2	chemokine (C-C motif) ligand 2	-0.554742	11.5614	0.000124274	0.00379779	11.6961	11.1414				5290300	ig66z0utSj3sOfxEpI	5290300	ADAM10	ADAM metallopeptidase domain 10	-0.386592	7.60063	6.72691e-05	0.00582981	7.79379	7.47779				7100639	Nnunn0fI5LiETL671g	7100639	ERRFI1	ERBB receptor feedback inhibitor 1	-0.350174	12.0346	0.0001466	0.0187175	11.8451	11.6701
		2680670	9qIANVn5wOMcBb7_p0	2680670	FNIP2	folliculin interacting protein 2	-0.554034	7.78031	1.48576e-05	0.000743076	8.09724	7.54321				3800487	Tv66R568VepXg6JwDQ	3800487	ZNFX1	zinc finger, NFX1-type containing 1	-0.386464	9.9411	0.000539052	0.0251846	10.2372	9.91648				510142	9tcizknrAFIpxNSzx4	510142	RAP1BL	RAP1B, member of RAS oncogene family pseudogene	-0.34993	7.37446	0.000166291	0.0204097	7.34038	7.16542
		1510608	0576touUtHn_gt7veo	1510608	ZMAT3	zinc finger, matrin-type 3	-0.553757	9.2739	1.46173e-06	0.000115645	9.4608	8.90705				4590224	uhfkPyDQkriEqILOXk	4590224	EVI2A	ecotropic viral integration site 2A	-0.385787	8.63582	8.96048e-05	0.00704002	8.92314	8.49802				5960703	cuu9Th9IsTU5otTz_I	5960703	37500	septin 2	-0.349684	11.6138	8.88566e-06	0.00262023	11.4787	11.3038
		3130220	EgX.UL43NS4bpeupv0	3130220	TMEM158	transmembrane protein 158 (gene/pseudogene)	-0.553475	7.62019	6.91039e-07	6.48378e-05	7.81766	7.26419				460730	ZKcgDHZH10gV39_8Go	460730	BMPR2	bone morphogenetic protein receptor, type II (serine/threonine kinase)	-0.384978	8.52405	0.00026696	0.0153722	8.79415	8.43887				650326	HlBzpe6NA1JeeXn.zo	650326	TFAM	transcription factor A, mitochondrial	-0.346049	8.39589	3.11013e-05	0.00619462	8.32245	8.14943
		7400743	KVb81O7U_GlNzvn32k	7400743	RNF213	ring finger protein 213	-0.549343	8.6295	1.07365e-06	8.92976e-05	8.91555	8.36621				3140553	ulUaBHPXMIyeAgnnuI	3140553	SAR1A	SAR1 homolog A (S. cerevisiae)	-0.383036	8.62928	0.00137423	0.0479312	8.76819	8.46189				1990092	BiSop96y534517t6_k	1990092	CYB561D1	cytochrome b561 family, member D1	-0.342898	8.73637	0.000412315	0.0393363	8.58188	8.41043
		3120767	ff7kki6fEerdDOVd_k	3120767	CNIH1	cornichon family AMPA receptor auxiliary protein 1	-0.548327	10.1947	2.47527e-05	0.00109345	10.1807	9.63238				4900435	rpB1LSBJIDCblvSrUg	4900435	TNFSF13B	tumor necrosis factor (ligand) superfamily, member 13b	-0.381677	7.55468	0.00115385	0.0424625	7.82998	7.41729				4290431	NoSEsN17je5ye4pJ3o	4290431	DPYSL3	dihydropyrimidinase-like 3	-0.342514	11.2425	0.00011722	0.0156565	11.0864	10.9151
		3400019	KeS7W84uUAN7fgpJxE	3400019	RGS2	regulator of G-protein signaling 2, 24kDa	-0.545879	9.96749	0.000210441	0.00560173	10.2837	9.73781				70463	KdBVGQvXieBOiQqirg	70463	NOL3	nucleolar protein 3 (apoptosis repressor with CARD domain)	-0.380927	8.50613	0.00014991	0.0103147	8.80879	8.44611				3290682	NS3EtTUChQXl8RN0KA	3290682	SLC35F5	solute carrier family 35, member F5	-0.342456	8.58574	0.000555536	0.048145	8.57375	8.40253
		7550411	xV81EqjEujNwBSFVLo	7550411	TBC1D9B	TBC1 domain family, member 9B (with GRAM domain)	-0.544969	9.44131	8.63345e-06	0.000484027	9.68524	9.14028				6200669	Wc8GcY5eBcULedeVQI	6200669	HIST1H2BD	histone cluster 1, H2bd	-0.379427	8.42764	0.000448316	0.0219385	8.818	8.29196				5550037	cfMedTfVaUTlWULHkQ	5550037	CNN2	calponin 2	-0.342088	10.6039	8.24869e-05	0.0120835	10.4882	10.3172
		5550768	rDrnu1ntRIAZXwslcU	5550768	NA	NA	-0.544726	9.59848	8.74117e-07	7.84494e-05	9.62796	9.08323				5870202	fX.hK7ke.7dS4kTFOY	5870202	FBXO33	F-box protein 33	-0.37832	8.80814	6.88491e-05	0.0058992	9.09979	8.77066				1660184	WUn5.vkZepD9JShPKE	1660184	GPR88	G protein-coupled receptor 88	-0.336673	9.05852	0.000160821	0.0200638	8.84873	8.6804
		6620121	TtPvdXXF7ey77qtdU4	6620121	CCL8	chemokine (C-C motif) ligand 8	-0.542516	7.66265	0.000237112	0.00613197	8.02497	7.48245				6370678	Z_jCSSxSf0.sEt7pPo	6370678	PTBP3	polypyrimidine tract binding protein 3	-0.377572	8.49404	0.000426526	0.0210537	8.74503	8.40794				5550408	0SU5CShIOuHq5X64ns	5550408	TMED3	transmembrane emp24 protein transport domain containing 3	-0.334153	12.3569	0.00055932	0.0482188	12.2237	12.0566
		7100639	Nnunn0fI5LiETL671g	7100639	ERRFI1	ERBB receptor feedback inhibitor 1	-0.542014	12.0346	3.55083e-07	3.73264e-05	12.2121	11.6701				3130301	fr1fXPUJ9TJ55XL.f0	3130301	PIM1	pim-1 oncogene	-0.37736	8.13348	0.000455799	0.0221267	8.51038	8.02696				4480280	uOd.yBqAadI157pGqU	4480280	BRPF3	bromodomain and PHD finger containing, 3	-0.333349	8.95194	0.00048738	0.0442658	8.87929	8.71262
		6180427	xHuohSaLqKiGSyEiEg	6180427	G0S2	G0/G1switch 2	-0.540769	9.34034	2.9536e-06	0.000202611	9.59989	9.05912				4040450	fbXiV885e6yJDkIeAI	4040450	VCPIP1	valosin containing protein (p97)/p47 complex interacting protein 1	-0.37734	7.95369	0.0013954	0.0484125	8.21359	7.85033				2650192	olk1zp3H_IasXq7Ne4	2650192	ADTRP	androgen-dependent TFPI-regulating protein	-0.329226	7.88313	0.000115212	0.0155383	7.84273	7.67812
		990768	TpnrGwMhQ5Lyunf1CE	990768	OAS3	2'-5'-oligoadenylate synthetase 3, 100kDa	-0.538067	8.34476	0.00169362	0.0269862	9.01274	8.47468				3930377	WkEvu3I7SKTp6l1N3k	3930377	TRIM38	tripartite motif containing 38	-0.377245	7.99095	4.13625e-05	0.00394612	8.25977	7.87159				3420747	WuDuXii3aBogFLVYFA	3420747	ADD3	adducin 3 (gamma)	-0.328782	7.73905	0.000287748	0.0311124	7.63552	7.47113
		1510193	6egQlQDgeLl6C.GXjI	1510193	WTAP	Wilms tumor 1 associated protein	-0.538012	9.05919	3.56521e-05	0.00146918	9.43678	8.89877				2140279	xhiNqZvSrrOlshBc.s	2140279	HINT3	histidine triad nucleotide binding protein 3	-0.374704	8.58726	0.00056007	0.025953	8.8958	8.49037				7550500	EBp7SeefqtCoRl94G0	7550500	JUNB	jun B proto-oncogene	-0.328255	8.40022	0.000577991	0.0489696	8.33326	8.16913
		4920148	ryl6g9Y1yeSNk1RDmI	4920148	ALDH1A3	aldehyde dehydrogenase 1 family, member A3	-0.536016	9.00893	9.39958e-07	8.20873e-05	9.18749	8.65148				5420070	WI7KsS6BMJLvFXp6i0	5420070	FRMD6	FERM domain containing 6	-0.371429	10.1316	0.000512284	0.0243345	10.3376	10.0286				2760451	TV8AtQN9_M_4FsVfUs	2760451	KPNA3	karyopherin alpha 3 (importin alpha 4)	-0.326872	7.81796	0.00046458	0.0428811	7.71548	7.55204
		5890047	ZdIDrSOtKJSc5JLMU0	5890047	ZDHHC17	zinc finger, DHHC-type containing 17	-0.531579	8.12475	4.92942e-07	4.83327e-05	8.36739	7.83581				6220097	6Wwu19TkK1R3K4yEqE	6220097	PPAP2B	phosphatidic acid phosphatase type 2B	-0.370921	9.35448	0.0007261	0.0310648	9.43952	8.91099				1820253	Tl5771E3b578T1.uiU	1820253	PRKRIR	protein-kinase, interferon-inducible double stranded RNA dependent inhibitor, repressor of (P58 repressor)	-0.326651	9.43662	0.000315764	0.0336608	9.34429	9.18097
		5960021	K5XvN1y5wQxHUtOJak	5960021	PIP4K2A	phosphatidylinositol-5-phosphate 4-kinase, type II, alpha	-0.528663	10.8195	1.04258e-06	8.80029e-05	10.9722	10.4435				510288	u0YEMn5ncd7Lzuj5Yk	510288	MFSD1	major facilitator superfamily domain containing 1	-0.370667	9.7239	0.000200087	0.0126904	9.94625	9.59635				5670397	WvHo8nV117uOsU5Mi0	5670397	NA	NA	-0.323116	9.11154	0.00032108	0.0339059	9.14152	8.97996
		3940500	clCJam8z5j6R.OeFNo	3940500	OSR1	odd-skipped related 1 (Drosophila)	-0.528331	9.40161	5.94299e-06	0.000358887	9.52151	8.99318				3460133	iWC39U9H3cgJ5QhIpI	3460133	PAK2	p21 protein (Cdc42/Rac)-activated kinase 2	-0.369994	8.45882	0.000252444	0.0148883	8.72021	8.35321				6370364	3ene_nuE3PU3uLh3_E	6370364	NA	NA	-0.31779	11.0232	0.00050458	0.0451063	10.8824	10.7235
		2810296	6fmSuYulJIrRgwHk3c	2810296	BCKDHA	branched chain keto acid dehydrogenase E1, alpha polypeptide	-0.52741	9.06085	1.9712e-05	0.000913741	9.24289	8.71548				4560576	c7XeqIK5TrfK7e5VKE	4560576	MYD88	myeloid differentiation primary response 88	-0.368504	8.11103	0.000835255	0.034049	8.32894	8.02631				5720735	QeUV54t73rDarMMp3k	5720735	JAG1	jagged 1	-0.312932	8.57375	0.000183144	0.0220024	8.41195	8.25548
		5260612	cXifOcArqOHSJ6p60U	5260612	TRIM25	tripartite motif containing 25	-0.526376	8.97631	1.02197e-05	0.000555138	9.3293	8.80292				1430626	B.fQzu_EFJXuverJAo	1430626	KCTD9	potassium channel tetramerization domain containing 9	-0.368299	8.07306	0.000203672	0.0128819	8.30113	7.99528				7050136	xl68XtOg55Lrr_UJ94	7050136	RAB22A	RAB22A, member RAS oncogene family	-0.311804	8.94477	0.000292684	0.0314961	8.82496	8.66906
		1740543	lPl3ht63.otHeTieeE	1740543	JAK1	Janus kinase 1	-0.526132	9.14766	6.26364e-05	0.0022575	9.26386	8.73773				130446	BdXXenNcV7e6nf8cUk	130446	SNX11	sorting nexin 11	-0.367671	8.6506	0.000328001	0.0176066	8.86115	8.61257				1190047	3RSnk4h4X1pPfHDLf0	1190047	DENND5B	DENN/MADD domain containing 5B	-0.31132	7.72526	4.96677e-05	0.00854359	7.69127	7.53561
		4670020	TWn13iT2Ol8kXTQlJE	4670020	NIPA2	non imprinted in Prader-Willi/Angelman syndrome 2	-0.524555	10.0562	4.66141e-07	4.69674e-05	10.2095	9.68491				6040088	Nd91eTR709EOAryggk	6040088	ACN9	ACN9 homolog (S. cerevisiae)	-0.36695	8.05646	0.000463182	0.0223766	8.21904	7.94365				1010465	uCje7y1eo6dQpedygo	1010465	MICU1	mitochondrial calcium uptake 1	-0.310333	8.25925	0.000390079	0.0380134	8.13515	7.97999
		7050136	xl68XtOg55Lrr_UJ94	7050136	RAB22A	RAB22A, member RAS oncogene family	-0.524429	8.94477	2.55546e-07	2.85834e-05	9.19349	8.66906				520324	Q6NBB5x3agh13HRJ4I	520324	REEP5	receptor accessory protein 5	-0.366923	10.4575	0.000581972	0.0266416	10.5351	10.3292				7380367	fkrKaifV5updP355Ig	7380367	C9orf69	chromosome 9 open reading frame 69	-0.308522	9.18231	0.000252195	0.0284892	9.19836	9.0441
		2570079	KZTRJ4H74jVbvHlzSQ	2570079	STAT1	signal transducer and activator of transcription 1, 91kDa	-0.524409	11.3753	0.00283527	0.0385265	11.8646	11.3402				5090671	QWq7Z1IXOOH7yUCHlE	5090671	GDF15	growth differentiation factor 15	-0.366906	10.0197	0.000881825	0.0352512	10.431	9.849				460204	0XlXNHLk57pSEjhF.4	460204	PLIN2	perilipin 2	-0.307866	11.4792	0.000388656	0.0380134	11.3245	11.1705
		1410037	BRIt.oJSS25XWzHtR0	1410037	PIP4K2A	phosphatidylinositol-5-phosphate 4-kinase, type II, alpha	-0.523717	9.81384	1.0527e-06	8.82011e-05	9.96986	9.44614				1510181	N5VZ4Z9X5b6f6O3_eQ	1510181	PTGES	prostaglandin E synthase	-0.366158	8.77596	0.000743933	0.0313973	9.00881	8.74035				3140520	oJVKJUv0Ol_e7rv0Lk	3140520	TMOD1	tropomodulin 1	-0.299333	7.5938	0.000114748	0.0155383	7.4963	7.34664
		460204	0XlXNHLk57pSEjhF.4	460204	PLIN2	perilipin 2	-0.523271	11.4792	3.3379e-07	3.59196e-05	11.6938	11.1705				2900747	i6SQgrik0qBqDSnqHg	2900747	C10orf10	chromosome 10 open reading frame 10	-0.365732	11.9363	4.8923e-05	0.00444338	12.2322	11.7424				2470242	Bq.iMjj.6gKkA7tI5U	2470242	SEMA3D	sema domain, immunoglobulin domain (Ig), short basic domain, secreted, (semaphorin) 3D	-0.296756	6.88857	0.000255992	0.0287112	6.92456	6.77619
		6280270	Tid4J.g09LrojpfesE	6280270	TMEM66	transmembrane protein 66	-0.523091	11.7891	3.65059e-06	0.000242369	11.8553	11.3322				2640202	fBCyRXo_Nol13dAeqU	2640202	NOS2	nitric oxide synthase 2, inducible	-0.365651	8.0687	5.35816e-05	0.00480347	8.33252	7.98039				6350037	rCeDkQije4R4Tp7ruQ	6350037	DNM1L	dynamin 1-like	-0.295366	7.89258	0.000455821	0.0425921	7.77667	7.62899
		6380241	W5UMd_VNdn55XKO13s	6380241	UNC45A	unc-45 homolog A (C. elegans)	-0.522847	8.84677	2.88473e-06	0.000198487	9.01747	8.49463				2470161	ood7Xu0Xd1K7Unt05c	2470161	PLEKHF1	pleckstrin homology domain containing, family F (with FYVE domain) member 1	-0.36458	9.22224	0.000370913	0.0192722	9.42204	9.09703				4390632	WiQHvStpC0d81Hv_X0	4390632	NA	NA	-0.294699	7.14608	0.000376627	0.0372351	7.07272	6.92537
		6980167	El3_iTFR4669EJxUZU	6980167	ZNF295-AS1	ZNF295 antisense RNA 1	-0.522758	7.80781	1.39939e-05	0.00071084	8.00559	7.48283				6960037	uKz5l5_r3lOXok4V4g	6960037	EDC4	enhancer of mRNA decapping 4	-0.364275	9.01238	0.000590447	0.0269197	9.18801	8.86977				1570129	BSwYp.47vieiuLoWqk	1570129	TRAFD1	TRAF-type zinc finger domain containing 1	-0.29025	9.01208	0.000341272	0.035063	8.86468	8.71956
		4780224	BJIHip6jPXTrpJnTJg	4780224	STMN3	stathmin-like 3	-0.520913	8.75412	8.12151e-06	0.000461018	9.09062	8.56971				6020692	Nv6rtD.c0GQEXyrFSE	6020692	2006-03-01	membrane-associated ring finger (C3HC4) 6, E3 ubiquitin protein ligase	-0.364072	9.34388	0.000128746	0.00933961	9.5238	9.22155				7160180	KlNYvHTiFLlTgrSHik	7160180	UCHL3	ubiquitin carboxyl-terminal esterase L3 (ubiquitin thiolesterase)	-0.279837	9.29112	0.000267089	0.0294394	9.2029	9.06298
		2680543	0kuu29FuIt5MgdJLuU	2680543	PDE4B	phosphodiesterase 4B, cAMP-specific	-0.520712	9.40465	3.99035e-05	0.00159235	9.70823	9.18752				5050402	iSYLWdWZUIKnYICW4c	5050402	HIST1H2BK	histone cluster 1, H2bk	-0.363852	9.33834	0.000355453	0.0185966	9.63903	9.29276				3940392	Qd3CE93iu7igtHHXJc	3940392	PRUNE2	prune homolog 2 (Drosophila)	-0.278353	11.3921	0.000295119	0.0316084	11.2993	11.1601
		2690390	Tt5huq2hqZcdZqzRSc	2690390	HCG4	HLA complex group 4 (non-protein coding)	-0.520248	10.5825	0.000170315	0.00475666	10.9501	10.4298				5670594	ftON52g115wIKd6m4k	5670594	NMB	neuromedin B	-0.362856	9.02535	3.25813e-05	0.003259	9.39465	9.00974				6760037	3q3rFfkoX_yvuoALZI	6760037	SYTL2	synaptotagmin-like 2	-0.276938	8.6883	0.000584996	0.049041	8.54695	8.40848
		2940438	uqkfDrRfsEv_7B1S44	2940438	PTGER4	prostaglandin E receptor 4 (subtype EP4)	-0.519732	8.27221	1.98589e-06	0.000145928	8.52637	8.00664				730286	9KgVOTeXpPykkiVeFs	730286	TXNRD1	thioredoxin reductase 1	-0.360121	8.28026	8.60757e-05	0.00688181	8.53218	8.24826				1170170	TulH1wooEFW3jdIPpE	1170170	STC2	stanniocalcin 2	-0.274154	12.0113	0.0005026	0.0451063	11.9091	11.772
		4040576	95LUl4qd9pA7JOpF0g	4040576	IL6	interleukin 6 (interferon, beta 2)	-0.516091	10.7067	0.000248994	0.00636674	11.0158	10.4997				7000338	0fUxPL1RTZOVKhR5ek	7000338	ATXN7L3B	ataxin 7-like 3B	-0.359766	9.2492	8.2438e-05	0.00670909	9.43078	9.13476				4010075	Tf7n3Pn._7.vCTtX6U	4010075	XPR1	xenotropic and polytropic retrovirus receptor 1	-0.273052	8.2673	0.000575499	0.0489696	8.14339	8.00687
		5080021	uUov4NTXqSTHiFeX8A	5080021	BIRC3	baculoviral IAP repeat containing 3	-0.515717	8.64898	3.10983e-05	0.00131249	8.99551	8.47979				2320133	xk6Coy.p1fopzsp_1Y	2320133	TXNRD1	thioredoxin reductase 1	-0.359345	8.3493	0.000187685	0.0121067	8.65329	8.32893				240064	9WQUXkBSBh3IP19VlU	240064	ETV6	ets variant 6	-0.272905	8.49968	0.000333345	0.0345613	8.3504	8.21395
		1030747	lBLUXe7cU4VX10R4Xs	1030747	HLA-E	major histocompatibility complex, class I, E	-0.514233	11.5575	9.84195e-06	0.000538485	11.9232	11.4089				5050047	xpTRqDotTnICJ0u_p4	5050047	CCAR2	cell cycle and apoptosis regulator 2	-0.355779	8.19481	0.000102116	0.00778069	8.36046	8.11901				2650753	Q7XTF7RPrjdEiipTlk	2650753	KIAA1324L	KIAA1324-like	-0.268406	7.37408	0.000336345	0.0347138	7.2676	7.13339
		2490754	WaoAUj3_TepXcePvAo	2490754	MAP1LC3B	microtubule-associated protein 1 light chain 3 beta	-0.513173	9.79011	8.62298e-07	7.76958e-05	9.9965	9.48333				7050575	KUzo0FE5E18cSDW1.Q	7050575	PPAP2B	phosphatidic acid phosphatase type 2B	-0.355259	10.6438	7.85384e-05	0.0064847	10.8171	10.1813				3930093	iHl3kOH7LS6CLNH9V4	3930093	UBA5	ubiquitin-like modifier activating enzyme 5	-0.257084	7.73108	0.000544537	0.0479235	7.67045	7.5419
		240722	EUAD7d6Qy8X1SMStVU	240722	OAS2	2'-5'-oligoadenylate synthetase 2, 69/71kDa	-0.511352	7.34783	5.39113e-05	0.00200674	7.79634	7.28499				4570100	EpRCVKLnhITSCegqEI	4570100	NA	NA	-0.355201	8.88512	0.000293549	0.0164171	9.19999	8.82132				3840678	KXROrt7r3de7A7RlUU	3840678	CARD10	caspase recruitment domain family, member 10	-0.2537	7.21269	0.000271637	0.0297961	7.199	7.07215
		1470341	u4qfw1.AH6IJ6epmuk	1470341	PLEKHB2	pleckstrin homology domain containing, family B (evectins) member 2	-0.510929	8.29832	8.359e-06	0.0004698	8.54471	8.03378				3170446	BH70tH4jgOfqsn.U10	3170446	NUDT21	nudix (nucleoside diphosphate linked moiety X)-type motif 21	-0.354009	8.18695	0.000979663	0.0377661	8.28744	8.12875				5550402	lI103moLul6vFFJLlE	5550402	PHF19	PHD finger protein 19	0.262557	7.41142	0.000585313	0.049041	7.50982	7.6411
		4860671	cAA8noRrpKZe7umplI	4860671	KDSR	3-ketodihydrosphingosine reductase	-0.509904	8.53455	1.57107e-05	0.000774171	8.71833	8.20843				7040132	rS90d3wOsXQAnol3eU	7040132	ANKRD12	ankyrin repeat domain 12	-0.353416	8.41131	0.00018968	0.0121663	8.69542	8.33022				4180133	6UKFA16L3VB.Io6Aqk	4180133	SKA3	spindle and kinetochore associated complex subunit 3	0.265228	7.07767	0.000249942	0.0284892	7.15541	7.28802
		7100288	HIXrpEnSp50S4KQxR4	7100288	CCT2	chaperonin containing TCP1, subunit 2 (beta)	-0.508218	10.2321	3.15733e-05	0.00133006	10.3102	9.80203				4890487	luo2ITsJJNOiv4I5ZM	4890487	B2M	beta-2-microglobulin	-0.350876	13.3908	0.000433493	0.0212589	13.6338	13.3388				780528	9UEi3Ker08Tj04lIFE	780528	CKS2	CDC28 protein kinase regulatory subunit 2	0.270908	8.77255	0.000361277	0.0364584	9.04812	9.18357
		1990468	W8fn_kwIOJQ4F3u17o	1990468	ADD3	adducin 3 (gamma)	-0.505974	7.95556	8.40765e-07	7.60574e-05	8.09565	7.58968				6180427	xHuohSaLqKiGSyEiEg	6180427	G0S2	G0/G1switch 2	-0.35016	9.34034	0.000615932	0.0275224	9.59989	9.15443				1990546	T9U13d7opQFB3_UklE	1990546	MLEC	malectin	0.271575	10.4809	0.000444499	0.0420533	10.7835	10.9193
		1570129	BSwYp.47vieiuLoWqk	1570129	TRAFD1	TRAF-type zinc finger domain containing 1	-0.503565	9.01208	1.94956e-07	2.34215e-05	9.22312	8.71956				5310360	3t7o3njsS5f55zo0A0	5310360	TLE4	transducin-like enhancer of split 4 (E(sp1) homolog, Drosophila)	-0.35013	7.62587	0.00034734	0.0182563	7.85856	7.53588				2470600	l0zjrGkkqLpVS8E6e4	2470600	KATNAL1	katanin p60 subunit A-like 1	0.279575	8.58721	0.000589613	0.0492197	8.70171	8.8415
		1980309	EVLftPlJ7vrLnu_Dxo	1980309	IL8	interleukin 8	-0.503538	11.4191	0.000110712	0.00351391	11.7549	11.2514				4070719	rma6Gv6ZUUpjQx.o.8	4070719	C15orf48	chromosome 15 open reading frame 48	-0.349565	8.03536	8.6946e-05	0.00690279	8.34246	7.97298				3800600	uu3qV6J6jhPi.ieeF4	3800600	MAGED1	melanoma antigen family D, 1	0.295087	11.5139	0.000120215	0.0159625	11.5892	11.7367
		7380634	QpZVLnjojlH9u4eYE8	7380634	MRGBP	MRG/MORF4L binding protein	-0.503264	9.19232	9.70161e-08	1.37678e-05	9.30188	8.79862				7050382	lklI6yJkjlRR4CLh.g	7050382	CASP1	caspase 1, apoptosis-related cysteine peptidase	-0.347653	8.03796	0.000204631	0.0129065	8.32104	7.90663				450424	E3u67.sWkajOgYAef4	450424	ACKR3	atypical chemokine receptor 3	0.302343	11.1762	0.000560635	0.0482188	11.1906	11.3417
		2470070	6vSOEmFl.09VWUXsdE	2470070	TBL1X	transducin (beta)-like 1X-linked	-0.502304	9.72724	3.49211e-06	0.000233317	9.84451	9.34221				870451	NqLqAJOwidf_461NxU	870451	ASB8	ankyrin repeat and SOCS box containing 8	-0.347026	8.21289	0.00143953	0.0495995	8.3536	8.12095				2320170	BngJ4o2iQv3oZHz9XU	2320170	CDC45	cell division cycle 45	0.302391	7.43457	0.000377172	0.0372351	7.63758	7.78877
		5220070	Bzkii9KFxeipi5ei_c	5220070	HLA-F	major histocompatibility complex, class I, F	-0.501804	8.72874	6.02214e-05	0.00218782	9.06178	8.55998				6510735	QjpTeSFCCQldBIHg3E	6510735	DDX60L	DEAD (Asp-Glu-Ala-Asp) box polypeptide 60-like	-0.34689	7.1858	0.00024784	0.0147315	7.41254	7.09211				1240300	Np36oQpDf56GQvWwVg	1240300	ENO3	enolase 3 (beta, muscle)	0.303279	7.61183	0.000518182	0.0461332	7.6744	7.82604
		6510608	Ke0X111R97NdIjnm6M	6510608	BTBD11	BTB (POZ) domain containing 11	-0.500707	10.1775	1.37956e-06	0.000111872	10.2605	9.75982				1450333	91r.DPno.nF.rx_5Ls	1450333	AKAP11	A kinase (PRKA) anchor protein 11	-0.346745	8.14192	2.66694e-05	0.0028836	8.34952	8.03063				5260403	reEHuCUV6nEgFEt9Uk	5260403	ST3GAL5	ST3 beta-galactoside alpha-2,3-sialyltransferase 5	0.303629	7.60086	0.000355534	0.0360438	7.69525	7.84706
		630278	33KnLHy.RFaieogAF4	630278	H1F0	H1 histone family, member 0	-0.498683	10.8411	0.000268485	0.00670196	11.0477	10.549				5420564	HR0Ih8yURBQ3efSHeo	5420564	NFIL3	nuclear factor, interleukin 3 regulated	-0.345667	9.28814	0.000654129	0.0287285	9.58904	9.12408				6620537	WpPs.euj7khRgKe8i0	6620537	SAR1B	SAR1 homolog B (S. cerevisiae)	0.308318	7.98211	0.00056708	0.0485891	8.04616	8.20032
		6620397	BVAAoikiCA4ldXaYJc	6620397	ISCU	iron-sulfur cluster assembly enzyme	-0.498402	9.37555	1.93946e-06	0.000143444	9.49446	8.99606				5720768	3ep7rP6uN.E99IdO7s	5720768	IRAK3	interleukin-1 receptor-associated kinase 3	-0.344386	7.89944	4.86429e-05	0.00443909	8.10585	7.7859				4390273	uEkIk7u5R9VxVBuAF0	4390273	RASSF7	Ras association (RalGDS/AF-6) domain family (N-terminal) member 7	0.310014	8.5956	0.000386757	0.0380134	8.77458	8.92959
		6520725	rJQp6Hq_nku678ujFE	6520725	TNFRSF14	tumor necrosis factor receptor superfamily, member 14	-0.498288	9.81125	3.16908e-05	0.00133254	9.96304	9.46475				630356	0Lt45pR09p1Ug9ch6s	630356	DAZAP2	DAZ associated protein 2	-0.343947	11.9562	8.21814e-05	0.00670909	12.1107	11.8412				7550608	xnUO7kn_Byp6r7q5d8	7550608	TMEM9B	TMEM9 domain family, member B	0.310072	9.91087	0.000193407	0.0228724	9.94146	10.0965
		4670414	lF4JSEqSKbWeEDR1Tg	4670414	TMEM140	transmembrane protein 140	-0.498227	8.58913	0.000468515	0.0103484	8.83706	8.33883				6060475	od8q77LJ4BOiObJ7Tk	6060475	BMPR2	bone morphogenetic protein receptor, type II (serine/threonine kinase)	-0.342916	7.91722	0.00135	0.0473043	8.23669	7.8286				650113	QKKeknu5KOpIrMOMKM	650113	COL2A1	collagen, type II, alpha 1	0.311703	7.37313	0.000235634	0.0274374	7.49838	7.65423
		360192	QUUtJIOgnyKB_XuJno	360192	INSIG1	insulin induced gene 1	-0.498065	10.7797	5.30853e-06	0.000326654	10.9593	10.4613				7610538	05.K._ASVaYZdz6d2k	7610538	H1FX	H1 histone family, member X	-0.342114	8.8987	0.000625717	0.0277957	9.11007	8.77714				1450392	iHl5x_KlKOdVSoIBoM	1450392	COL11A2	collagen, type XI, alpha 2	0.313511	7.6916	0.000484756	0.0442043	7.7308	7.88756
		50435	inuu5Me7LxMlfUPerU	50435	DNM1L	dynamin 1-like	-0.497469	8.05781	2.68381e-05	0.00116374	8.20174	7.70428				4210470	36UM.uV3ofyyn_sDuI	4210470	PCNXL4	pecanex-like 4 (Drosophila)	-0.340743	9.07018	0.000652178	0.0286984	9.31531	8.9749				540100	B7JXoXl19XapTH3v1M	540100	TCTA	T-cell leukemia translocation altered	0.317264	8.78414	0.000478855	0.0438423	8.85212	9.01075
		1090414	QUX6npHfJEXiEj8JdU	1090414	TMEM203	transmembrane protein 203	-0.497178	9.71574	2.10149e-07	2.48122e-05	9.81175	9.31458				6620201	NhcK0.n9DyKdSLfTLo	6620201	KLHL24	kelch-like family member 24	-0.340545	8.23971	0.000428934	0.0211266	8.55029	8.15293				4490615	HoBSf3rwrwRSOuVdPo	4490615	TSPAN3	tetraspanin 3	0.319147	11.7448	0.000321993	0.0339059	11.8615	12.0211
		4760703	rXfTkN64kuuSmqJSIA	4760703	DDX58	DEAD (Asp-Glu-Ala-Asp) box polypeptide 58	-0.496916	7.60602	0.0017544	0.0275487	7.95429	7.45737				7210093	xiUdCQh3n3Ozril__8	7210093	PGM2L1	phosphoglucomutase 2-like 1	-0.339191	7.76619	0.00026074	0.0151331	8.08588	7.5946				3060100	ryfiJVEp3lEVuH01Ec	3060100	ADCY9	adenylate cyclase 9	0.321618	7.63514	0.000276753	0.0302113	7.57592	7.73673
		3370671	rJd5BC0rrrTv1fcv_k	3370671	MED20	mediator complex subunit 20	-0.496684	9.05402	2.85413e-06	0.000196979	9.2434	8.74672				5890047	ZdIDrSOtKJSc5JLMU0	5890047	ZDHHC17	zinc finger, DHHC-type containing 17	-0.338501	8.12475	0.000216656	0.0133679	8.36739	7.93235				1450653	6eelF5f9RoaSh7huiI	1450653	NA	NA	0.321868	7.20241	0.000238726	0.0275153	7.3327	7.49363
		3800465	fK5_UetekgOmnngLhc	3800465	FAM174B	family with sequence similarity 174, member B	-0.494768	8.27293	4.90401e-06	0.00030507	8.37926	7.8845				1980369	BusjR_K0IvuEUl6UF4	1980369	C4orf3	chromosome 4 open reading frame 3	-0.337568	10.768	0.000164769	0.0110361	10.9945	10.6885				2680278	HuWssSMFXTAjnzcF1U	2680278	FAM111A	family with sequence similarity 111, member A	0.322648	9.07477	0.000343814	0.035165	9.16425	9.32557
		7610053	THcpENrtDZ3SnUue_0	7610053	DDX60	DEAD (Asp-Glu-Ala-Asp) box polypeptide 60	-0.494537	7.75926	0.0017294	0.0274025	8.11051	7.61597				3930750	uV6nvqKBI4hLpzIJH4	3930750	IRAK2	interleukin-1 receptor-associated kinase 2	-0.337459	8.32757	0.000207218	0.0129975	8.62477	8.25767				5260594	i_rhDkROepAKuOlLp4	5260594	AHNAK2	AHNAK nucleoprotein 2	0.323332	9.59322	0.000446725	0.0420885	9.5816	9.74327
		3140707	rfqvqsrIxQOAR.ShfU	3140707	PARP9	poly (ADP-ribose) polymerase family, member 9	-0.493913	8.0972	0.00178451	0.02781	8.55118	8.05726				3460070	0tJ6OFIueAVElEJLUg	3460070	SPP1	secreted phosphoprotein 1	-0.337319	11.137	0.000223947	0.0136692	11.3693	11.0848				830543	cUTV3lHVIA3GJX0XUg	830543	EPYC	epiphycan	0.330311	8.29019	0.000429417	0.0407964	8.33481	8.49996
		3840593	Eo.0e9wnVbhe64pgKg	3840593	SP110	SP110 nuclear body protein	-0.4934	9.14179	0.00110669	0.0198018	9.49553	9.00213				6650164	Tlmcdek7o0UIxD9614	6650164	NA	NA	-0.336929	8.76218	8.35213e-05	0.00674897	8.97728	8.51976				6250382	9Jf90CV.S8QUVRzoNI	6250382	ANAPC13	anaphase promoting complex subunit 13	0.330804	11.0664	0.00045348	0.0425484	11.2061	11.3715
		7050576	WSJVRo.eRHere566BM	7050576	COMMD7	COMM domain containing 7	-0.493017	10.5225	9.10799e-07	8.04693e-05	10.7296	10.2366				4670575	H10pNT1DQgOOud5NLo	4670575	HTATIP2	HIV-1 Tat interactive protein 2, 30kDa	-0.33526	8.91348	0.00100177	0.038553	9.04582	8.9281				2940687	HSIVJI7B3T7JTVAgBU	2940687	TMEM245	transmembrane protein 245	0.331231	8.34062	0.000125778	0.0166041	8.18487	8.35049
		130519	TpXkSunv37e87SKBLU	130519	STAT2	signal transducer and activator of transcription 2, 113kDa	-0.492395	11.4906	1.10549e-05	0.000590827	11.8103	11.3179				5720327	Q7lNpAlKQnkCGgMiCc	5720327	PSMA3	proteasome (prosome, macropain) subunit, alpha type, 3	-0.333503	8.38702	0.000320608	0.0174156	8.4664	8.31884				3360053	NeX0pSCQFA.FK.p6KI	3360053	KDELR3	KDEL (Lys-Asp-Glu-Leu) endoplasmic reticulum protein retention receptor 3	0.332307	10.581	0.000115651	0.0155383	10.7726	10.9387
		2970437	0e.hddVd584KrJOPe4	2970437	PLEKHA2	pleckstrin homology domain containing, family A (phosphoinositide binding specific) member 2	-0.490801	8.02959	1.10588e-05	0.000590827	8.24941	7.75861				4830382	W.NXvk3p5EiXddAjnE	4830382	CPEB2	cytoplasmic polyadenylation element binding protein 2	-0.333297	7.5031	0.000265744	0.0153536	7.75131	7.44618				2490168	x6q7AIi0SsVQosjlKs	2490168	MAGEH1	melanoma antigen family H, 1	0.333796	8.5621	0.000576802	0.0489696	8.63885	8.80574
		1660184	WUn5.vkZepD9JShPKE	1660184	GPR88	G protein-coupled receptor 88	-0.490514	9.05852	1.04826e-06	8.81552e-05	9.17091	8.6804				50402	T5vrUiaKe7l6qL.Xcw	50402	ENO2	enolase 2 (gamma, neuronal)	-0.332086	10.2329	0.000225674	0.0137242	10.5913	10.2697				2060079	Zq5NDnizVh19pTzIik	2060079	MGAT2	mannosyl (alpha-1,6-)-glycoprotein beta-1,2-N-acetylglucosaminyltransferase	0.333829	7.9615	1.75772e-05	0.00420113	7.92078	8.0877
		4880673	Hi9BxO96qVojI4f5I4	4880673	GADD45A	growth arrest and DNA-damage-inducible, alpha	-0.489554	10.2805	0.0010082	0.0183671	10.4562	9.96665				2630347	3gMUcd42..R4Vrimqo	2630347	NA	NA	-0.331697	9.24043	0.00133977	0.0470184	9.32198	9.17934				3850154	cumUIGBe.BJ7BQ6x40	3850154	MTDH	metadherin	0.335971	8.97367	0.000555397	0.048145	8.98488	9.15287
		1940647	6K6SSU1vPP1DohclSk	1940647	HBP1	HMG-box transcription factor 1	-0.489371	8.94926	3.90665e-07	4.02123e-05	9.22353	8.73416				7510392	f3r8rs7L6lO8ftSKCI	7510392	DIP2B	DIP2 disco-interacting protein 2 homolog B (Drosophila)	-0.330376	8.19899	0.000197208	0.0125429	8.46199	8.09687				7150762	9fClEek3V4X3UqEgko	7150762	PTGIS	prostaglandin I2 (prostacyclin) synthase	0.33964	8.93599	0.000221118	0.0258799	9.01943	9.18925
		3120228	ETe7o7Q4QQXp8XopT0	3120228	AP2S1	adaptor-related protein complex 2, sigma 1 subunit	-0.488354	11.031	0.000138751	0.00408368	11.1382	10.6498				6520646	QVApRNQhKQw4ki.EnU	6520646	IQGAP1	IQ motif containing GTPase activating protein 1	-0.330322	9.19212	0.000523763	0.0247669	9.40354	9.16482				3420300	Hp.kpTMl3nkDnSV574	3420300	EEF2K	eukaryotic elongation factor-2 kinase	0.342304	9.28127	6.80439e-05	0.0104193	9.31559	9.48674
		6650189	fqiMRwVUgOHnCXfl_0	6650189	PEX5	peroxisomal biogenesis factor 5	-0.48812	9.99626	5.91056e-06	0.00035788	10.0778	9.58973				5870242	BA3uA107.feWzUy9AQ	5870242	NA	NA	-0.329262	8.11951	0.00122335	0.0440912	8.39307	8.12079				5870113	K6DSNcJTISnD5UUdUo	5870113	THOC7	THO complex 7 homolog (Drosophila)	0.343003	11.0984	5.12669e-05	0.00860306	11.1495	11.321
		6420309	6l04e7_O1.PjEC4l7k	6420309	FAM134B	family with sequence similarity 134, member B	-0.486772	9.49886	8.1822e-06	0.00046205	9.75678	9.27001				6280209	Zr9OhHviQ7EuzrufF4	6280209	CAMSAP2	calmodulin regulated spectrin-associated protein family, member 2	-0.32746	8.36128	0.000144688	0.0100161	8.62844	8.29389				4890500	cSXdQq.0XyQQ6ie6i4	4890500	TOR1A	torsin family 1, member A (torsin A)	0.343533	9.46696	0.000580497	0.0489991	9.52897	9.70074
		5960731	3g_pJ05_IVDdTjhcQk	5960731	SOD2	superoxide dismutase 2, mitochondrial	-0.485765	7.96806	0.000461381	0.0102206	8.22375	7.73799				5080280	u5fXW__biBW7lX1RTM	5080280	SEMA4B	sema domain, immunoglobulin domain (Ig), transmembrane domain (TM) and short cytoplasmic domain, (semaphorin) 4B	-0.327456	8.40852	0.000723498	0.0310544	8.51988	8.33867				7050026	H5OvxXeLzv33LiTl54	7050026	SPCS3	signal peptidase complex subunit 3 homolog (S. cerevisiae)	0.34661	7.50641	4.15715e-05	0.00761227	7.52827	7.70157
		870491	lSy3hs.Vfe1XLCVL54	870491	BUB3	BUB3 mitotic checkpoint protein	-0.485663	11.0617	1.43127e-05	0.000723377	11.1087	10.623				1240440	fSUyR.vR7Xu0iR4nUU	1240440	TXNIP	thioredoxin interacting protein	-0.326943	12.2281	0.00118095	0.042906	12.4753	11.9094				1850397	EJ3Owoh8iUB78J7NNU	1850397	HAPLN1	hyaluronan and proteoglycan link protein 1	0.346984	9.07013	0.000332902	0.0345613	9.18585	9.35934
		1940180	xEJ7VZ5GJk3HuR3evQ	1940180	PSMB9	proteasome (prosome, macropain) subunit, beta type, 9	-0.484107	8.04644	5.68355e-05	0.00208483	8.26986	7.78575				2850743	EKASSh6dC5UK.vypeo	2850743	NA	NA	-0.32642	8.9947	0.00112038	0.0416357	9.16113	8.92412				4150066	EA4JWlRFYRSV559cHw	4150066	CKB	creatine kinase, brain	0.347543	7.54791	5.19078e-05	0.00860306	7.70269	7.87646
		1990630	cTqn3heJFCvioSjyko	1990630	TRIB3	tribbles homolog 3 (Drosophila)	-0.482813	9.06416	1.03325e-06	8.78655e-05	9.04782	8.565				3060100	ryfiJVEp3lEVuH01Ec	3060100	ADCY9	adenylate cyclase 9	-0.325697	7.63514	0.000241555	0.0143957	7.74081	7.57592				1980553	op9CKam5Xei1XFOHgo	1980553	ADAM15	ADAM metallopeptidase domain 15	0.349524	8.83582	6.24447e-05	0.00977841	8.88719	9.06195
		7610440	odbdZwAxgDyUpuumJE	7610440	XAF1	XIAP associated factor 1	-0.481359	8.16927	0.00156168	0.0254555	8.49887	8.01751				6060767	BgnCcruCDoPoJUeX1Q	6060767	AASDHPPT	aminoadipate-semialdehyde dehydrogenase-phosphopantetheinyl transferase	-0.325205	7.75375	0.000298164	0.0165934	7.96985	7.72775				5820292	W9VDXpAJUCNUq0oiFU	5820292	COPZ2	coatomer protein complex, subunit zeta 2	0.351954	8.8665	0.000520131	0.0461332	8.92534	9.10131
		2970672	3X5F_5LNfz97nvd14k	2970672	ANKIB1	ankyrin repeat and IBR domain containing 1	-0.481166	9.48662	2.57376e-07	2.86469e-05	9.56598	9.08481				6380743	ivqukS6VAiSfSIw9fo	6380743	STX12	syntaxin 12	-0.32493	8.11412	0.000273832	0.0155831	8.3332	7.99499				3780600	363QqASg7R.hXt_gbY	3780600	SPCS3	signal peptidase complex subunit 3 homolog (S. cerevisiae)	0.357195	7.9975	6.11598e-05	0.00964371	8.13458	8.31317
		7050382	lklI6yJkjlRR4CLh.g	7050382	CASP1	caspase 1, apoptosis-related cysteine peptidase	-0.481158	8.03796	3.13831e-06	0.00021399	8.32104	7.83988				2940438	uqkfDrRfsEv_7B1S44	2940438	PTGER4	prostaglandin E receptor 4 (subtype EP4)	-0.323134	8.27221	0.000705621	0.0303444	8.52637	8.10494				5260014	3ZI6Kh14TJSee4DDoI	5260014	CDKN3	cyclin-dependent kinase inhibitor 3	0.362164	8.35528	0.000184463	0.0220443	8.56557	8.74666
		70162	x4OBJA5SCC9SVSdedI	70162	TDG	thymine-DNA glycosylase	-0.48034	7.90795	0.000946973	0.0174971	8.18192	7.70158				4590370	oKl7qJeQHR50IIToh0	4590370	SLC2A1	solute carrier family 2 (facilitated glucose transporter), member 1	-0.321142	11.2743	0.000735697	0.0312823	11.5873	11.2341				1850192	uU2TOod_UtfhPtqf9A	1850192	NA	NA	0.362433	8.05489	0.000236975	0.0274528	8.22212	8.40334
		150474	6JFXS9e5dJUSlHuMOs	150474	CA12	carbonic anhydrase XII	-0.480263	9.57224	9.04774e-06	0.000503812	9.7973	9.31704				610367	N0_ivqCguKIC7378u8	610367	HECA	headcase homolog (Drosophila)	-0.317704	7.21993	0.000114652	0.00847979	7.42551	7.11226				6620292	r7_NRVfV4A16iv8_eU	6620292	C10orf54	chromosome 10 open reading frame 54	0.362906	8.57692	3.7376e-05	0.00713158	8.70623	8.88769
		6290435	f6o16VdBde6BUkve8w	6290435	USP4	ubiquitin specific peptidase 4 (proto-oncogene)	-0.479676	8.31062	1.8622e-06	0.000139089	8.46022	7.98055				6860400	BH4IFDULu5VxVSdILI	6860400	NAP1L5	nucleosome assembly protein 1-like 5	-0.315988	7.97855	0.000272661	0.0155554	8.11516	7.981				1940605	lf5Lnd3uek.CaIdjpU	1940605	WRAP73	WD repeat containing, antisense to TP73	0.363536	8.47857	0.000142456	0.0183784	8.39805	8.57982
		1690465	NVfUXd.l7KOx7Oy05E	1690465	NA	NA	-0.479451	8.8643	9.72067e-07	8.38605e-05	9.17418	8.69473				6290524	0V.iL1ELrLIuvwbf10	6290524	TOR1AIP1	torsin A interacting protein 1	-0.314643	9.45422	0.000133932	0.00949044	9.58004	9.36479				6860400	BH4IFDULu5VxVSdILI	6860400	NAP1L5	nucleosome assembly protein 1-like 5	0.363653	7.97855	5.39893e-05	0.00888319	7.981	8.16282
		5360148	uVnHtvPjRN7uCUCVbo	5360148	LIPA	lipase A, lysosomal acid, cholesterol esterase	-0.478346	8.66987	1.39865e-06	0.000112616	8.65517	8.17682				3400482	Zeqv30z1576CS_FIDk	3400482	RPIA	ribose 5-phosphate isomerase A	-0.314426	7.64642	0.00061319	0.0274889	7.81148	7.56006				110451	cXSOUqt53JNLCz8kgE	110451	SSR1	signal sequence receptor, alpha	0.365003	10.1727	4.26673e-05	0.00768891	10.3155	10.498
		5860093	EV6IdaEeElm6xIMBvM	5860093	NA	NA	-0.474272	7.46359	7.1371e-05	0.00250085	7.67914	7.20487				1770433	KUnW793Cg8.REaFN.I	1770433	YWHAG	tyrosine 3-monooxygenase/tryptophan 5-monooxygenase activation protein, gamma polypeptide	-0.313502	8.70451	0.00113879	0.0421128	8.84899	8.66631				450164	Kk8_4SUYFT5UQVdRXY	450164	RAB5C	RAB5C, member RAS oncogene family	0.368725	8.74197	0.000181957	0.0219762	8.76211	8.94647
		3060273	KSeeUuIKRV1u6JG6Iw	3060273	MT3	metallothionein 3	-0.473314	7.27512	6.64771e-06	0.000392059	7.71541	7.2421				1780709	rh_Ah_yO7jvSkSjngI	1780709	DDX17	DEAD (Asp-Glu-Ala-Asp) box helicase 17	-0.31035	8.56172	0.000381294	0.0195875	8.72712	8.46122				5720327	Q7lNpAlKQnkCGgMiCc	5720327	PSMA3	proteasome (prosome, macropain) subunit, alpha type, 3	0.371891	8.38702	9.48516e-05	0.013631	8.31884	8.50478
		6060475	od8q77LJ4BOiObJ7Tk	6060475	BMPR2	bone morphogenetic protein receptor, type II (serine/threonine kinase)	-0.473257	7.91722	4.25128e-05	0.00167898	8.23669	7.76343				4670167	6fPW7u.qL5_q_qtuqE	4670167	CAPZB	capping protein (actin filament) muscle Z-line, beta	-0.308795	9.48845	0.00132628	0.0466891	9.63373	9.4205				7330253	0ofRQkgMVokZTUQrnk	7330253	MCM5	minichromosome maintenance complex component 5	0.3722	8.1017	9.82095e-05	0.0139372	8.431	8.6171
		1980594	oUh7jh6iang4jou5PE	1980594	FTH1P8	ferritin, heavy polypeptide 1 pseudogene 8	-0.473248	13.0722	1.6662e-05	0.000811861	13.4268	12.9535				2070088	NUU4V31054Hk9fVQ0U	2070088	HLA-G	major histocompatibility complex, class I, G	-0.307981	8.07336	0.000643494	0.0284264	8.35048	8.00466				6960168	ZoOoiqC36SoDV.6URI	6960168	ATP8B2	ATPase, aminophospholipid transporter, class I, type 8B, member 2	0.376433	10.1085	3.61497e-05	0.00695606	10.1733	10.3615
		5290433	oiUU3Hq5914u4S7Keo	5290433	NA	NA	-0.473088	8.14068	0.00165987	0.0265602	8.35097	7.87788				5900471	ETS.78dNdSgeStC_0o	5900471	PTGER2	prostaglandin E receptor 2 (subtype EP2), 53kDa	-0.307276	9.71079	0.000523546	0.0247669	9.96527	9.67953				7610537	ukAuCSgIKlekpQSnQI	7610537	HMGB2	high mobility group box 2	0.376824	9.15119	7.42462e-05	0.011091	9.43174	9.62016
		1440408	EnQtQNeU4Xd7HcoFSo	1440408	GEM	GTP binding protein overexpressed in skeletal muscle	-0.472354	9.28266	2.7505e-05	0.00118731	9.46243	8.99007				7050131	9jjkvez8_57t61wuiU	7050131	ATP6V1A	ATPase, H+ transporting, lysosomal 70kDa, V1 subunit A	-0.307018	10.7118	0.000158991	0.0107782	10.9764	10.6136				2630347	3gMUcd42..R4Vrimqo	2630347	NA	NA	0.378102	9.24043	0.000376906	0.0372351	9.17934	9.36839
		6560075	3tH0U0E9eVSOn_49XU	6560075	TRIM21	tripartite motif containing 21	-0.469222	8.25982	0.000259672	0.00655123	8.59921	8.12999				2630474	rV99EXHR.EH_dcHur4	2630474	MLLT11	myeloid/lymphoid or mixed-lineage leukemia (trithorax homolog, Drosophila); translocated to, 11	-0.306993	8.62131	0.000920493	0.0360357	8.81411	8.56252				4860114	um0iUnihKfl6H3sIyg	4860114	ACKR3	atypical chemokine receptor 3	0.379092	10.5402	0.000324037	0.0339059	10.6123	10.8019
		4590224	uhfkPyDQkriEqILOXk	4590224	EVI2A	ecotropic viral integration site 2A	-0.464442	8.63582	8.20074e-06	0.00046205	8.92314	8.4587				7400743	KVb81O7U_GlNzvn32k	7400743	RNF213	ring finger protein 213	-0.305295	8.6295	0.00137769	0.0479783	8.91555	8.48823				3420400	ZesSOBIdK_4_OSiR2U	3420400	NA	NA	0.381466	8.0134	4.81862e-05	0.00842696	8.2375	8.42823
		2060088	uXRKlUK7WLu_reBmAw	2060088	CLCN7	chloride channel, voltage-sensitive 7	-0.464129	11.0775	8.32092e-05	0.00282837	11.3419	10.8777				70541	ul141JapUj1HivItT8	70541	REC8	REC8 meiotic recombination protein	-0.305215	7.86509	0.000236806	0.0141871	8.06301	7.83981				1820037	3nfp1fivecuu8ouvEE	1820037	SLC11A2	solute carrier family 11 (proton-coupled divalent metal ion transporter), member 2	0.387181	9.29838	0.000133226	0.0172859	9.25119	9.44478
		1170170	TulH1wooEFW3jdIPpE	1170170	STC2	stanniocalcin 2	-0.463601	12.0113	5.41319e-07	5.2303e-05	12.2356	11.772				4210019	Nic3pfHfLL.yxuehFE	4210019	RIOK3	RIO kinase 3	-0.304677	9.98918	0.000280433	0.0158396	10.2963	10.0052				4290010	uD1Su_6ysPg06qS.V0	4290010	DPH5	diphthamide biosynthesis 5	0.389407	8.27918	0.000112493	0.0153871	8.33355	8.52825
		2490240	Bu43rRzuHl.Gv3dTuc	2490240	PTPRE	protein tyrosine phosphatase, receptor type, E	-0.462671	9.52279	0.000232722	0.00605289	9.74501	9.28234				6200072	indenl.07J0nOkVU4E	6200072	GPR19	G protein-coupled receptor 19	-0.30316	7.4465	0.000509859	0.0242701	7.71622	7.38922				3170446	BH70tH4jgOfqsn.U10	3170446	NUDT21	nudix (nucleoside diphosphate linked moiety X)-type motif 21	0.390624	8.18695	0.000370538	0.0372148	8.12875	8.32406
		5890630	TkydF.cBUvCToIisso	5890630	MTPN	myotrophin	-0.460056	8.60623	0.000573968	0.0121346	8.57	8.10994				4120039	BZWDenaaDF3yEJEV6o	4120039	FTH1P2	ferritin, heavy polypeptide 1 pseudogene 2	-0.301734	12.774	0.00118315	0.0429147	13.0623	12.7152				990161	KSM9_nSper4qJ8qChs	990161	CDIPT	CDP-diacylglycerol--inositol 3-phosphatidyltransferase	0.398189	9.49969	0.000152714	0.0191575	9.53004	9.72914
		1980592	QjIAoqJx3SnkJpBLlQ	1980592	HLA-H	major histocompatibility complex, class I, H (pseudogene)	-0.459879	8.9197	4.41496e-05	0.00172541	9.29613	8.83625				4200440	xByFFJO9O1IXaS6bkc	4200440	TULP4	tubby like protein 4	-0.301017	8.4285	0.00021166	0.013131	8.64974	8.38503				3400332	TkrTkRL.jAqSwQs_qU	3400332	RHOB	ras homolog family member B	0.401927	7.89594	6.99676e-06	0.00217628	7.96846	8.16942
		290292	lu_lLiOC3XQKCkk7tc	290292	STEAP2	STEAP family member 2, metalloreductase	-0.459474	9.07361	6.63663e-05	0.00235088	9.29341	8.83394				1690465	NVfUXd.l7KOx7Oy05E	1690465	NA	NA	-0.299151	8.8643	0.00042605	0.0210537	9.17418	8.78488				7320747	Q69cXogn_KCpSiVfaE	7320747	PSTPIP1	proline-serine-threonine phosphatase interacting protein 1	0.408382	7.8464	0.000150431	0.0190821	7.94488	8.14907
		6620201	NhcK0.n9DyKdSLfTLo	6620201	KLHL24	kelch-like family member 24	-0.454187	8.23971	1.40523e-05	0.000712213	8.55029	8.09611				1580338	0Xn_ie7DpJgE7J7f70	1580338	KANSL1	KAT8 regulatory NSL complex subunit 1	-0.298842	8.46288	0.000598432	0.027176	8.7127	8.37332				20241	EdV._eEEe7E_FH1xTE	20241	SLC7A1	solute carrier family 7 (cationic amino acid transporter, y+ system), member 1	0.417965	9.67825	0.000131787	0.0171974	9.5838	9.79278
		4280047	Nle6oq35fBNX5P6eQI	4280047	PMP22	peripheral myelin protein 22	-0.453988	10.3209	4.2785e-05	0.00168659	10.5606	10.1066				1770661	xjq9LrOJIoIjVIyyUs	1770661	RAB21	RAB21, member RAS oncogene family	-0.297398	8.74378	0.000743294	0.0313973	8.96472	8.64458				620458	xVei1iCgDoPevTHutU	620458	SMARCC1	SWI/SNF related, matrix associated, actin dependent regulator of chromatin, subfamily c, member 1	0.418777	8.7464	0.000459142	0.042601	8.59697	8.80636
		510520	xlfFSgM19OlEgOiplQ	510520	ARHGAP22	Rho GTPase activating protein 22	-0.453592	9.7021	9.0378e-05	0.00301002	9.81791	9.36432				830411	BGU.UKkoKpLteCVN.0	830411	PPME1	protein phosphatase methylesterase 1	-0.295164	9.36483	0.00144598	0.0496707	9.56948	9.40315				4730196	N4TSXn31Xeaf0eeL94	4730196	TK1	thymidine kinase 1, soluble	0.420236	8.42055	6.82358e-05	0.0104193	8.76696	8.97707
		1980524	HU6l.0SqESn3wBBWn0	1980524	GBP4	guanylate binding protein 4	-0.452371	7.62224	2.68564e-05	0.00116374	7.86459	7.41222				1050600	lvhNQNyUiV9HlOMnqk	1050600	MAP2K1	mitogen-activated protein kinase kinase 1	-0.294504	10.1232	0.000182903	0.0118319	10.3099	10.0731				1980484	Hs8SyFnhvVC4SNSpf0	1980484	EFHD1	EF-hand domain family, member D1	0.420742	9.09556	2.66602e-05	0.00544477	9.24988	9.46025
		5340129	rXn6YfSwnEnCVNpaAI	5340129	AKR1C2	aldo-keto reductase family 1, member C2	-0.451486	12.4222	0.000252014	0.00641623	12.5941	12.1426				2480050	c9dFJStdKQLXSUufyI	2480050	SOX7	SRY (sex determining region Y)-box 7	-0.294312	7.13662	0.000898528	0.035694	7.30618	7.04744				4480224	i3nnejp4KdepTfTuec	4480224	SRPRB	signal recognition particle receptor, B subunit	0.421345	10.0439	8.64536e-06	0.00258292	10.1428	10.3534
		7040301	QpCljp0o46pElZf4EM	7040301	PLEKHB2	pleckstrin homology domain containing, family B (evectins) member 2	-0.451455	7.78674	0.000189955	0.00518427	7.98864	7.53718				2900358	Td6KP6rlXdpKgSgsoM	2900358	MFSD12	major facilitator superfamily domain containing 12	-0.290765	7.87289	0.00106736	0.0401913	8.16201	7.84898				4180452	unu3iN6N5U0f6cuEqc	4180452	ATP1B1	ATPase, Na+/K+ transporting, beta 1 polypeptide	0.429268	9.30709	2.01479e-05	0.00446984	9.49383	9.70846
		3990241	9TjadUuRVfCrCSlkzc	3990241	NA	NA	-0.450562	7.90429	1.97187e-05	0.000913741	8.07949	7.62893				830164	l6PUrei.1DvDsBIHpE	830164	ZFP36L1	ZFP36 ring finger protein-like 1	-0.290655	9.22148	0.000901709	0.035694	9.41527	9.14006				3460743	HrlFBU.7lE5C.4MKOs	3460743	COL11A1	collagen, type XI, alpha 1	0.432492	10.6748	1.85755e-05	0.00432521	10.8268	11.0431
		4230626	r_nlt6Wp3TrH13uB7s	4230626	PRKCD	protein kinase C, delta	-0.450358	8.80085	1.59705e-06	0.000123763	8.93876	8.4884				2810504	iJ6LSpD1BQgHmkpauQ	2810504	MAFG-AS1	MAFG antisense RNA 1 (head to head)	-0.290324	7.64669	0.000100406	0.00767619	7.90264	7.58227				7320139	BKGRXR1Xnl9HX94UJA	7320139	SOX8	SRY (sex determining region Y)-box 8	0.433849	8.49104	0.000100036	0.0141081	8.62118	8.83811
		5490612	Zov8vJoLS9Kk.yp7fk	5490612	ARHGAP12	Rho GTPase activating protein 12	-0.449329	7.79078	7.17523e-05	0.00250647	7.95495	7.50562				2480739	oonHKO31JdeS0KLFHs	2480739	SKP1	S-phase kinase-associated protein 1	-0.290141	9.69173	0.0010967	0.0408894	9.88889	9.66455				4670575	H10pNT1DQgOOud5NLo	4670575	HTATIP2	HIV-1 Tat interactive protein 2, 30kDa	0.435096	8.91348	6.07715e-05	0.00964371	8.9281	9.14565
		1980113	NHao516.tTcef49fo0	1980113	MKRN1	makorin ring finger protein 1	-0.448723	10.4861	9.57951e-07	8.302e-05	10.6172	10.1685				6590037	f3ilRECehFVKdx1NU8	6590037	SLC20A2	solute carrier family 20 (phosphate transporter), member 2	-0.289722	8.15004	0.00130067	0.0460739	8.2619	8.00031				6020735	irp0SIKOkjrklBDnhY	6020735	GINS2	GINS complex subunit 2 (Psf2 homolog)	0.441914	8.01163	5.15042e-05	0.00860306	8.3586	8.57955
		6380138	6S13FNeR7iSRzF7m_0	6380138	WASL	Wiskott-Aldrich syndrome-like	-0.446346	9.67962	2.02029e-05	0.00093048	9.87744	9.43109				3120474	3ncoveBoKSGIpH81LU	3120474	NA	NA	-0.289662	8.50644	0.00118102	0.042906	8.6374	8.46262				2970730	ouy5EZGrv3u5y_ffnk	2970730	MYADM	myeloid-associated differentiation marker	0.446286	11.8372	2.46504e-07	0.000180552	11.8387	12.0618
		2490577	EDUn7DWVAJpJQ2iZig	2490577	PLEKHA4	pleckstrin homology domain containing, family A (phosphoinositide binding specific) member 4	-0.44467	9.15542	6.13373e-06	0.000368484	9.41523	8.97056				4050358	fdeh7h.S6iOgu.SIHg	4050358	SUMO1P3	SUMO1 pseudogene 3	-0.289592	8.25695	0.00088131	0.0352512	8.44302	8.16023				110468	Hnt6oVwi.3Re9LdNwU	110468	S100A16	S100 calcium binding protein A16	0.449541	9.24852	2.34459e-05	0.00497535	9.32529	9.55006
		2850286	rVP0hJBOyCO9JuSp_c	2850286	KIAA0226L	KIAA0226-like	-0.444304	8.97314	1.20911e-05	0.00063483	9.26536	8.82105				5420176	rSJR3H6XheStX5VlJQ	5420176	NA	NA	-0.287997	7.26922	0.000626768	0.0277957	7.44513	7.236				2940110	rUvfXhFo6ufqBb_JfM	2940110	UHRF1	ubiquitin-like with PHD and ring finger domains 1	0.450398	8.45993	2.26627e-05	0.00490075	8.83317	9.05837
		4810520	Tpd7ZHBnduvnYe_ze4	4810520	TRIB1	tribbles homolog 1 (Drosophila)	-0.444212	9.49405	4.41334e-05	0.00172541	9.7135	9.26929				3610162	0pBqCG1CXwE0u5bOtQ	3610162	IDS	iduronate 2-sulfatase	-0.287953	8.7372	0.000786665	0.0325355	8.92822	8.70518				5340246	QUXlLvPznV9urjpRlc	5340246	CRIP2	cysteine-rich protein 2	0.450652	10.4712	0.000399249	0.0385759	10.5483	10.7737
		4900435	rpB1LSBJIDCblvSrUg	4900435	TNFSF13B	tumor necrosis factor (ligand) superfamily, member 13b	-0.443702	7.55468	0.00025706	0.00649979	7.82998	7.38627				4120037	6qCpJCgTqFIJe10sO4	4120037	CBL	Cbl proto-oncogene, E3 ubiquitin protein ligase	-0.286439	7.30657	0.000766522	0.0318766	7.49314	7.21525				5820097	BwuX4noOqCqhCrS3to	5820097	TMBIM1	transmembrane BAX inhibitor motif containing 1	0.459359	10.7435	0.000163024	0.0201176	10.6301	10.8597
		4920379	Bnsku19NSoLw6LfoV8	4920379	NA	NA	-0.440845	8.37216	0.000101192	0.00330125	8.46875	8.0279				2060047	iXftIjXcUSE8MniSiU	2060047	B4GALT5	UDP-Gal:betaGlcNAc beta 1,4- galactosyltransferase, polypeptide 5	-0.285357	9.0326	0.000575774	0.0264646	9.2016	8.99875				650678	KjupQtR7XX6aQCVPgg	650678	TAGLN	transgelin	0.468759	12.3699	1.21996e-05	0.00325886	12.51	12.7444
		20446	3h4ZBUbsHtJaleLDZ8	20446	CEBPB	CCAAT/enhancer binding protein (C/EBP), beta	-0.440662	12.9222	2.12257e-05	0.000969722	13.1562	12.7156				460243	lbhxZeZRduX9.NxJp8	460243	UNC93B1	unc-93 homolog B1 (C. elegans)	-0.284165	7.50125	0.00094619	0.036788	7.71187	7.44338				6520139	Z0VAWkrmP_8FSYYH9Y	6520139	FGFR3	fibroblast growth factor receptor 3	0.471167	9.18117	1.70136e-05	0.0041097	9.38499	9.62058
		2900450	ir7h1CJIuKCFVCTIdo	2900450	ADAR	adenosine deaminase, RNA-specific	-0.439836	11.4011	0.000104911	0.0033885	11.7596	11.3198				5270132	xm60reewT9UUHd_e1E	5270132	CBLB	Cbl proto-oncogene B, E3 ubiquitin protein ligase	-0.283329	9.29569	0.00109526	0.0408894	9.64207	9.17018				940138	uehJW37hLh1S4lUgOE	940138	HRCT1	histidine rich carboxyl terminus 1	0.482289	7.94043	7.57292e-07	0.000409407	8.1814	8.42255
		6450703	l1NRAo5LlUH7HmXgy0	6450703	FAF2	Fas associated factor family member 2	-0.43902	9.94763	5.46245e-07	5.25553e-05	10.0445	9.60545				2480424	fogblc9Ed6ghnDe4Tc	2480424	PLCG2	phospholipase C, gamma 2 (phosphatidylinositol-specific)	-0.282697	7.96345	0.00040699	0.0205358	8.11877	7.9204				3990689	3x6dQshTtJ9FVaf7t4	3990689	NA	NA	0.482443	11.1576	3.47276e-07	0.000225293	11.2514	11.4926
		670255	ZeR5ueuGDUT03Q6CjU	670255	GADD45A	growth arrest and DNA-damage-inducible, alpha	-0.438738	9.89489	0.000251841	0.00641623	10.083	9.64422				2940113	Qt_Bx7ty6kDtPvF3u4	2940113	AGL	amylo-alpha-1, 6-glucosidase, 4-alpha-glucanotransferase	-0.282067	7.54443	0.00104635	0.0397412	7.67619	7.48989				5910364	3oz7S38qvqejlisAvc	5910364	TYMS	thymidylate synthetase	0.488899	9.46596	1.65972e-06	0.000738933	9.83589	10.0803
		3780270	H3866qSH_R8eS5BH5E	3780270	HBP1	HMG-box transcription factor 1	-0.438102	8.95937	1.72517e-05	0.000833096	9.16538	8.72727				3780681	KedHu197rdKJ5L7574	3780681	MBP	myelin basic protein	-0.281599	7.5679	0.00025493	0.0149959	7.76577	7.43259				4010136	cheO1PTVFd0S9of91U	4010136	COL2A1	collagen, type II, alpha 1	0.494605	9.96575	3.94363e-05	0.00737597	10.2548	10.5021
		2140279	xhiNqZvSrrOlshBc.s	2140279	HINT3	histidine triad nucleotide binding protein 3	-0.436175	8.58726	0.000108373	0.00345392	8.8958	8.45963				6450139	9ELgpTQIPq4UbhQTkY	6450139	FTH1P3	ferritin, heavy polypeptide 1 pseudogene 3	-0.281435	12.0454	0.00101281	0.0387805	12.3301	11.9813				4730138	0UF6kEiYhVN8CFe3QA	4730138	GPX8	glutathione peroxidase 8 (putative)	0.510863	10.2652	1.66906e-07	0.000126326	10.2356	10.491
		5310168	KeO7d0SfgCXiEnt_4o	5310168	HLA-B	major histocompatibility complex, class I, B	-0.436041	11.4577	0.00150393	0.0246915	11.8209	11.3849				2470348	N_flnpOXig7P6f48RE	2470348	NFKBIZ	nuclear factor of kappa light polypeptide gene enhancer in B-cells inhibitor, zeta	-0.281147	10.1641	0.00141821	0.0489391	10.4051	10.0612				3850692	0PHsTIiErqT.6nF69s	3850692	KLF2	Kruppel-like factor 2 (lung)	0.520797	10.3741	4.82474e-05	0.00842696	10.5221	10.7825
		1030102	KVKklX_6VKMNBHvd3s	1030102	RGS16	regulator of G-protein signaling 16	-0.435372	8.58128	2.95922e-05	0.00126301	8.78646	8.35109				3610709	xfe6UjfjT0FLDrF4oE	3610709	PAG1	phosphoprotein associated with glycosphingolipid microdomains 1	-0.280379	7.37178	0.00126875	0.045439	7.59266	7.29099				5870136	NkogIvQMRu1kSZYjXo	5870136	CLIC3	chloride intracellular channel 3	0.53703	7.55052	4.17309e-07	0.000256093	7.66432	7.93283
		2680162	NfX56O6SDURSfNBQRI	2680162	EVI2A	ecotropic viral integration site 2A	-0.435268	7.58116	1.00245e-05	0.000547156	7.81641	7.38114				6980164	NirqREVJpeSLCfPFRA	6980164	NKIRAS2	NFKB inhibitor interacting Ras-like 2	-0.279323	8.28135	0.000451932	0.0220679	8.47964	8.1278				6770408	3ieeV36bi_bPSnn.nk	6770408	MCM2	minichromosome maintenance complex component 2	0.549066	7.93929	1.05643e-05	0.00289005	8.15636	8.43089
		5690411	EqAloiQQQAO.CWpmuk	5690411	MAFF	v-maf avian musculoaponeurotic fibrosarcoma oncogene homolog F	-0.433366	8.28778	0.000210169	0.00560173	8.54372	8.11035				510673	feJX9UTtynUO3XsrUU	510673	CDS2	CDP-diacylglycerol synthase (phosphatidate cytidylyltransferase) 2	-0.277884	8.42943	0.000790281	0.0326257	8.65193	8.38144				4490739	BlKOCoh6kId8ZVEeQ8	4490739	PPAP2A	phosphatidic acid phosphatase type 2A	0.560754	11.1713	1.42364e-07	0.000116531	11.3974	11.6778
		3870504	3_J5a9mL2KUr1l7bq8	3870504	ARRDC2	arrestin domain containing 2	-0.432679	7.89175	1.01075e-05	0.000550361	8.21346	7.78079				6660382	ltevVv3UXIewF3YqSo	6660382	CDKN1A	cyclin-dependent kinase inhibitor 1A (p21, Cip1)	-0.275066	12.463	0.00119724	0.0432835	12.7108	12.3609				5490240	cVdrdRuuzo3utPtXeQ	5490240	MAP1LC3A	microtubule-associated protein 1 light chain 3 alpha	0.56576	10.3963	7.00815e-05	0.0106085	10.13	10.4129
		6330725	ce1oOUVE31P1O1XVIk	6330725	BCL3	B-cell CLL/lymphoma 3	-0.43215	9.85112	1.48039e-05	0.000743076	10.0129	9.58074				7320437	36UASnSlAhdUJ7Ox9Q	7320437	DSCR3	Down syndrome critical region gene 3	-0.273613	9.38374	0.00084191	0.0342588	9.58486	9.36098				1030630	oQpMVX1Biiz3sOOLU0	1030630	PPAP2A	phosphatidic acid phosphatase type 2A	0.568174	10.4627	1.56805e-06	0.000726617	10.654	10.9381
		1190035	6Jehe6mLVPp6nel40c	1190035	CECR5	cat eye syndrome chromosome region, candidate 5	-0.431238	7.87038	7.27573e-06	0.000422513	8.036	7.60477				6760546	3Xvv55T6TgOlB7p7xI	6760546	TIPARP	TCDD-inducible poly(ADP-ribose) polymerase	-0.273004	8.95251	0.000555139	0.0257771	9.16664	8.88502				3130576	WULO_39Q65fn653Xro	3130576	CHIC2	cysteine-rich hydrophobic domain 2	0.571845	9.79903	1.72925e-06	0.000755084	9.69296	9.97889
		150678	KktV7v5SIx7nYLIr.E	150678	WBP1L	WW domain binding protein 1-like	-0.430811	8.39417	0.000351426	0.00827747	8.44942	8.01861				4760504	0e5JLp3u7A5zkeKMRA	4760504	PTEN	phosphatase and tensin homolog	-0.273003	9.95372	0.000804536	0.0330938	10.1153	9.91286				6060484	BkH9RXlT.7AHktN_hc	6060484	MARCKS	myristoylated alanine-rich protein kinase C substrate	0.572019	11.6066	4.31113e-09	1.63147e-05	11.5084	11.7944
		6280458	9OpibkU1f.guykhEqE	6280458	BCL6	B-cell CLL/lymphoma 6	-0.430164	11.727	9.50602e-05	0.00313726	11.9474	11.5173				5570646	WFY10lkdYtS5NXSP3c	5570646	SCML1	sex comb on midleg-like 1 (Drosophila)	-0.272724	7.6778	0.000756045	0.0317315	7.87304	7.61837				4730392	ZPwXFJX3VUMHutzEi0	4730392	MYL12A	myosin, light chain 12A, regulatory, non-sarcomeric	0.577858	12.7111	9.39379e-06	0.00266619	12.6739	12.9629
		4780086	cXBw6jUkqU.dSKlLNc	4780086	CRK	v-crk avian sarcoma virus CT10 oncogene homolog	-0.428329	9.27105	0.000108458	0.00345392	9.41715	8.98882				2970730	ouy5EZGrv3u5y_ffnk	2970730	MYADM	myeloid-associated differentiation marker	-0.271802	11.8372	0.000220356	0.0135227	11.8874	11.8387				4150477	0KUU9efjqneP5350Lo	4150477	LOXL4	lysyl oxidase-like 4	0.582473	11.3743	5.14549e-07	0.000307456	11.5933	11.8845
		6280332	oUxq_v0XXS1flxVLiI	6280332	CXCL16	chemokine (C-X-C motif) ligand 16	-0.428184	9.08579	8.78885e-05	0.00294336	9.32937	8.90119				5690347	TXw.koeX66f7_eoQpU	5690347	TPST2	tyrosylprotein sulfotransferase 2	-0.267054	8.67291	0.000662584	0.0289877	8.89108	8.57257				5270112	BlpDqSl5Ax6RIk8NMQ	5270112	HMGCS1	3-hydroxy-3-methylglutaryl-CoA synthase 1 (soluble)	0.627961	8.98896	1.28615e-07	0.00011232	8.92029	9.23427
		4760324	KpekLq4COgfnni5FH0	4760324	NOS2	nitric oxide synthase 2, inducible	-0.428081	8.50537	1.63419e-05	0.000803056	8.81768	8.3896				3840079	KTonQjt_7e7pyOl3n4	3840079	RAB3GAP1	RAB3 GTPase activating protein subunit 1 (catalytic)	-0.265624	10.428	0.000600752	0.0271947	10.5402	10.3543				2650193	THp8GLRJdJ7nqGFft0	2650193	SDC4	syndecan 4	0.685401	10.6827	8.91281e-09	2.2486e-05	10.6085	10.9512
		6650541	HohZok1CB6CcLMZ5ro	6650541	SP100	SP100 nuclear antigen	-0.425585	7.91881	6.69164e-06	0.000392611	8.24243	7.81685				5820730	05_ddd1VJX1XW4XFR0	5820730	NA	NA	-0.2616	7.22775	0.00131154	0.046242	7.39822	7.17887				5310471	6V04FQT4y1fgRE55Yk	5310471	UBE2C	ubiquitin-conjugating enzyme E2C	0.752747	7.93178	4.06977e-08	4.40039e-05	8.09283	8.4692
		3140193	Wpqpan6BjsYxXTLhTw	3140193	NSMF	NMDA receptor synaptonuclear signaling and neuronal migration factor	-0.425444	8.26238	0.000169843	0.00474934	8.36587	7.94042				160279	iU7tU3QlEiQdEqx9EU	160279	SLC15A4	solute carrier family 15 (oligopeptide transporter), member 4	-0.257151	10.4026	0.00037702	0.0194287	10.6123	10.428				4260368	ojLV_BETnlid6ABVEk	4260368	UBE2C	ubiquitin-conjugating enzyme E2C	1.14473	8.47564	2.11505e-12	2.96178e-08	8.73358	9.30595
		3190148	inm.CX1VNux5Ivieko	3190148	DDIT4	DNA-damage-inducible transcript 4	-0.425317	11.5416	0.0002559	0.00648163	11.696	11.2707				3400438	9V4f795ApF5O7e727I	3400438	HLA-A	major histocompatibility complex, class I, A	-0.248779	13.2301	0.00128832	0.0459223	13.4793	13.2186
		4670544	05VLSnQle6_ygwJe40	4670544	ACSS2	acyl-CoA synthetase short-chain family member 2	-0.425185	9.15743	3.61846e-05	0.00148037	9.31669	8.8915				2060079	Zq5NDnizVh19pTzIik	2060079	MGAT2	mannosyl (alpha-1,6-)-glycoprotein beta-1,2-N-acetylglucosaminyltransferase	-0.240577	7.9615	0.000751438	0.0315966	7.99444	7.92078
		7330053	xeS0eEuVKneq7d0ScM	7330053	HLA-F	major histocompatibility complex, class I, F	-0.424913	9.72429	0.00226161	0.0329603	10.0837	9.65882				1770646	igFXtVLSIwTUHB1IJo	1770646	EXO1	exonuclease 1	0.233514	6.98244	0.00123388	0.0444	6.82076	7.05999
		6660382	ltevVv3UXIewF3YqSo	6660382	CDKN1A	cyclin-dependent kinase inhibitor 1A (p21, Cip1)	-0.424652	12.463	8.08786e-06	0.000460258	12.7108	12.2861				1430129	lo7qXyXUrUhxx3O91I	1430129	KIF4A	kinesin family member 4A	0.251432	6.98101	0.000575423	0.0264646	6.83217	7.10423
		4640392	csqv1J9VKdaX7S3f5M	4640392	MLLT6	myeloid/lymphoid or mixed-lineage leukemia (trithorax homolog, Drosophila); translocated to, 6	-0.424529	8.70486	1.5718e-05	0.000774171	8.93227	8.50774				3990026	B_xQuiSuvmpCb7kiVM	3990026	CCNE1	cyclin E1	0.25347	7.30645	0.00111299	0.0414288	7.12524	7.34875
		6980164	NirqREVJpeSLCfPFRA	6980164	NKIRAS2	NFKB inhibitor interacting Ras-like 2	-0.42435	8.28135	2.38635e-06	0.000170391	8.47964	8.05529				990725	0onxwe6.kVwR3okHy0	990725	DONSON	downstream neighbor of SON	0.254405	7.72081	0.00106045	0.0400641	7.48971	7.85338
		6620528	Be1Z5u.1342oHXn3X4	6620528	MT1X	metallothionein 1X	-0.424089	13.867	0.000112299	0.00354149	14.1088	13.6847				3800753	WR1KULuXyRi4US.DIU	3800753	CDCA7L	cell division cycle associated 7-like	0.256985	7.65964	0.00116982	0.0427728	7.4196	7.72935
		3800537	WWOITW6.XRdRTEaXOc	3800537	PLEKHB2	pleckstrin homology domain containing, family B (evectins) member 2	-0.423797	8.39473	5.41962e-05	0.00201075	8.63443	8.21063				2140288	oSxE1zlMLrVEsQrpdU	2140288	PLBD1	phospholipase B domain containing 1	0.257332	9.286	0.000580873	0.0266416	9.0254	9.30067
		2060440	Q1T_A_emeelo5P.i.s	2060440	MAFB	v-maf avian musculoaponeurotic fibrosarcoma oncogene homolog B	-0.423183	11.762	5.37319e-05	0.00200334	11.9119	11.4888				1570551	07oEYidddKpekdF9z0	1570551	NCAPD3	non-SMC condensin II complex, subunit D3	0.258433	7.28204	0.000780268	0.0323329	7.08831	7.35224
		3420288	KLl5qhKHur9_tEXu_s	3420288	PDPN	podoplanin	-0.423074	12.202	0.000103067	0.00333883	12.2813	11.8583				5220095	xNS4iDi.l33566LJI4	5220095	DLGAP5	discs, large (Drosophila) homolog-associated protein 5	0.25957	7.15118	0.00102392	0.0391398	7.0212	7.25453
		6020719	fV011w74gDQP16u7X4	6020719	RAB23	RAB23, member RAS oncogene family	-0.420996	9.42289	8.23271e-05	0.00280543	9.45199	9.03099				2070520	9d5S3L96kr9e7Sz1V0	2070520	CDCA7	cell division cycle associated 7	0.262363	7.19955	0.000679797	0.029457	6.99937	7.33119
		6180070	3q5fX60UKS5uRvKv18	6180070	FTH1P11	ferritin, heavy polypeptide 1 pseudogene 11	-0.420222	13.0816	2.13481e-05	0.000972818	13.3361	12.9159				5960504	EC1yOkA26V0ecK5In4	5960504	PSMC3IP	PSMC3 interacting protein	0.263009	7.28538	0.00105042	0.0398178	7.05036	7.42324
		2640224	oV6dVJET1.gMK.QzE0	2640224	VEGFA	vascular endothelial growth factor A	-0.419965	9.55155	0.000134478	0.00400192	9.83807	9.41811				7380619	BVyJeKIKeKHnqJxI0k	7380619	NA	NA	0.263721	7.59191	0.000742904	0.0313973	7.34243	7.63194
		5310707	u5FJr7cEyAoPpfHH_o	5310707	EI24	etoposide induced 2.4	-0.419735	7.67309	0.00140285	0.0234214	7.85801	7.43828				2680707	rnkbnwA5Ii454Hwq9I	2680707	NA	NA	0.264341	7.44487	0.000601239	0.0271947	7.31529	7.48475
		780168	cUnv1Ree5LRfI70glk	780168	ISCU	iron-sulfur cluster assembly enzyme	-0.419221	11.0105	1.23736e-05	0.000642918	11.0761	10.6569				1190484	iX1VOd4yV_v5FzMAkU	1190484	NA	NA	0.269111	7.02681	0.00115087	0.0424215	6.90648	7.08336
		7050131	9jjkvez8_57t61wuiU	7050131	ATP6V1A	ATPase, H+ transporting, lysosomal 70kDa, V1 subunit A	-0.418534	10.7118	2.81203e-06	0.000194665	10.9764	10.5579				110139	0uNJKi.P4oTS0X_q_U	110139	EML4	echinoderm microtubule associated protein like 4	0.269229	8.42288	0.000671175	0.029139	8.28451	8.54544
		6280224	oJH9jvqZ6b_73qRRbg	6280224	CYP26B1	cytochrome P450, family 26, subfamily B, polypeptide 1	-0.417997	9.37481	0.00156599	0.0254891	9.50709	9.08909				3120689	9gvpOAnkdStJOBjpd0	3120689	ANTXR1	anthrax toxin receptor 1	0.271881	9.39009	0.00129835	0.0460739	9.24023	9.47159
		4480280	uOd.yBqAadI157pGqU	4480280	BRPF3	bromodomain and PHD finger containing, 3	-0.417796	8.95194	3.72991e-05	0.00151776	9.13042	8.71262				5670315	BaRT4sTmIV4YUsQnRo	5670315	LSM7	LSM7 homolog, U6 small nuclear RNA associated (S. cerevisiae)	0.272245	10.1206	0.000978775	0.0377661	9.90838	10.1387
		6450139	9ELgpTQIPq4UbhQTkY	6450139	FTH1P3	ferritin, heavy polypeptide 1 pseudogene 3	-0.416135	12.0454	1.14162e-05	0.000605643	12.3301	11.914				2340390	ZUFFTncF6ISU1Xl0gw	2340390	MRAP2	melanocortin 2 receptor accessory protein 2	0.272326	7.68112	0.000765013	0.0318723	7.37587	7.69681
		5570279	ZunCJUCClCvmCVCAnk	5570279	HIST1H1C	histone cluster 1, H1c	-0.415918	9.41115	0.000126083	0.0038376	9.75432	9.33841				1070152	QnnX7JUVOIJCIXwKfU	1070152	IL17RB	interleukin 17 receptor B	0.274427	7.59579	0.00020974	0.0130834	7.35401	7.65193
		3460008	c0eXxdXRr77ih4u7oI	3460008	TMEM173	transmembrane protein 173	-0.414532	10.047	6.9982e-05	0.00245977	10.0397	9.62518				2680497	WjXKC3vXtdXuSrNeyo	2680497	NCAPD2	non-SMC condensin I complex, subunit D2	0.275279	8.34644	0.000856208	0.0347162	8.15891	8.42778
		1340634	fio9xXgTF0SNdXtOUQ	1340634	GLB1	galactosidase, beta 1	-0.413072	10.8389	2.53126e-06	0.000177391	10.8911	10.4781				460382	0peLJ1XU1_yGdS1ccc	460382	CARM1	coactivator-associated arginine methyltransferase 1	0.275387	10.4794	0.000173047	0.0114114	10.3714	10.5536
		4590228	uL6367TOjSKRC5Ip7o	4590228	GLRX	glutaredoxin (thioltransferase)	-0.412007	12.4545	0.000145559	0.00422772	12.6442	12.2322				4150687	3J4UjVK71ImL30mh04	4150687	NDUFB2	NADH dehydrogenase (ubiquinone) 1 beta subcomplex, 2, 8kDa	0.275883	12.0018	0.000306181	0.0168333	11.7905	12.0769
		4180612	Ev0skz636T9_ke6954	4180612	UHMK1	U2AF homology motif (UHM) kinase 1	-0.411516	9.70705	4.51658e-05	0.00175305	10.0164	9.60491				4810112	0yeeXXDfXnLqFF9F6o	4810112	HAUS4	HAUS augmin-like complex, subunit 4	0.276787	8.5903	0.00091715	0.0360291	8.3064	8.66511
		1340600	cV6F0uopuniFB6.lzA	1340600	PPP1R15A	protein phosphatase 1, regulatory subunit 15A	-0.40983	10.8921	0.000572305	0.0121107	11.1422	10.7323				3390128	QB76KIJ4KKeIViSL_U	3390128	TPM2	tropomyosin 2 (beta)	0.280844	12.472	0.000189671	0.0121663	12.2363	12.5938
		6250064	xXQSlSoqC7iZfrOHwA	6250064	IRF1	interferon regulatory factor 1	-0.40922	8.78199	0.00235782	0.0339699	8.98593	8.57671				3870072	l2OXHZDpESUXUsXLI0	3870072	GULP1	GULP, engulfment adaptor PTB domain containing 1	0.281036	7.5042	0.000820313	0.0336818	7.31216	7.51046
		4010086	NeZfUgkrVAwJS5UXgA	4010086	OSGIN1	oxidative stress induced growth inhibitor 1	-0.407889	8.59703	0.000192877	0.00523858	8.95423	8.54634				240221	NLdHHg5Rffj0UrcB5I	240221	DLGAP5	discs, large (Drosophila) homolog-associated protein 5	0.281049	7.24699	0.000319304	0.0173864	7.00451	7.3525
		5670594	ftON52g115wIKd6m4k	5670594	NMB	neuromedin B	-0.406958	9.02535	6.99752e-06	0.000407399	9.39465	8.98769				5870725	BepQfvreD3XB1P_Ank	5870725	TTK	TTK protein kinase	0.281465	7.14138	0.000751187	0.0315966	6.93294	7.20455
		6370661	flMJt7m6LVQwF7rXl4	6370661	AP2S1	adaptor-related protein complex 2, sigma 1 subunit	-0.406797	12.6967	3.30797e-05	0.00137566	12.8112	12.4044				3140440	lUIR6eK7yoIoIq6yKI	3140440	NA	NA	0.281595	8.15801	0.00105492	0.0399218	7.91709	8.2551
		2470348	N_flnpOXig7P6f48RE	2470348	NFKBIZ	nuclear factor of kappa light polypeptide gene enhancer in B-cells inhibitor, zeta	-0.406639	10.1641	2.50642e-05	0.00110206	10.4051	9.9985				70239	3oVdQMr.n3rg360_rw	70239	AGGF1	angiogenic factor with G patch and FHA domains 1	0.281891	8.09287	0.0003502	0.0183641	7.87301	8.18228
		1580129	Tld5ZCAS7iceUZ4AcU	1580129	MRPS7	mitochondrial ribosomal protein S7	-0.406274	8.5699	4.4971e-05	0.00174848	8.62449	8.21822				2450156	BV.1_HPEeXooySIJe0	2450156	XBP1	X-box binding protein 1	0.283788	11.6377	0.000456665	0.0221267	11.4405	11.7199
		4780187	0k6btP6tn_Ornasgck	4780187	NA	NA	-0.406115	7.67156	2.08832e-05	0.000957926	7.93178	7.52566				2510088	czEq3N_fXFxN5_JLl0	2510088	GPR64	G protein-coupled receptor 64	0.284707	7.53099	0.00114676	0.0423389	7.26993	7.6323
		5490068	rCF0505LoT9_l7.Xuo	5490068	MCOLN2	mucolipin 2	-0.405503	9.44101	0.000146325	0.00424325	9.54402	9.13852				2510348	BuImZn5oZppPAa_Smw	2510348	PCNA	proliferating cell nuclear antigen	0.284781	7.40889	0.000912781	0.0359196	7.15617	7.51727
		5870307	TNJCXUutQFJZe9lujE	5870307	NA	NA	-0.404967	11.1362	2.83422e-05	0.00121882	11.348	10.943				7650672	EbqUp7uI76O.rHtTt4	7650672	ANGPTL2	angiopoietin-like 2	0.28512	11.0372	0.00116699	0.042738	10.8136	10.9751
		4570100	EpRCVKLnhITSCegqEI	4570100	NA	NA	-0.40213	8.88512	7.17189e-05	0.00250647	9.19999	8.79785				3180189	iFIAVOeKIBXFLu9Lkk	3180189	ZNF271	zinc finger protein 271	0.285433	7.83059	0.0011296	0.0419096	7.6672	7.93412
		3140603	Nv15JPKzh_94sefWuc	3140603	SVIL	supervillin	-0.402062	9.63905	0.000442629	0.00994098	9.87623	9.47416				6580474	od6Lrsx5RNLv4tLVSI	6580474	TUBB	tubulin, beta class I	0.288476	12.0653	0.000396117	0.0200874	11.8043	12.2233
		1850079	HnVfl7oE_3rXJ7r1T4	1850079	KANSL1	KAT8 regulatory NSL complex subunit 1	-0.400497	7.99457	0.00323133	0.0424107	8.1972	7.7967				1340689	iSPq6y6ivuTopS4CeE	1340689	RPN1	ribophorin I	0.288914	11.8583	0.000876305	0.0352166	11.6602	11.9449
		4060768	HlSi9AnsuJ7T7lHNdQ	4060768	DBT	dihydrolipoamide branched chain transacylase E2	-0.400275	8.8704	4.88615e-05	0.00185527	9.06732	8.66705				7330301	ZrASDeuPOrCCF691PU	7330301	NA	NA	0.289313	7.24686	0.000692184	0.0298797	7.03196	7.37448
		3940762	fep1FPXB1KyEIyO0RE	3940762	APH1B	APH1B gamma secretase subunit	-0.399961	8.81237	1.27942e-05	0.000660237	9.16196	8.762				510731	Hu16j3eVXeLIu_6jAo	510731	RRM2	ribonucleotide reductase M2	0.291337	7.15726	0.000533961	0.0251538	6.97787	7.23446
		7510392	f3r8rs7L6lO8ftSKCI	7510392	DIP2B	DIP2 disco-interacting protein 2 homolog B (Drosophila)	-0.399875	8.19899	1.94062e-05	0.000904798	8.46199	8.06212				3120379	fk1EX_OkOSPrJK9TKY	3120379	DPY19L1	dpy-19-like 1 (C. elegans)	0.292006	9.18476	0.000590492	0.0269197	8.98542	9.34435
		5220240	xt.it_o4NIDc1Kc31I	5220240	FTH1	ferritin, heavy polypeptide 1	-0.399597	11.1933	0.00213511	0.031583	11.4081	11.0085				6040072	TgCjpDpGiBDvUgqoLk	6040072	GPR89C	G protein-coupled receptor 89C	0.292771	7.52147	0.00130954	0.046242	7.37533	7.65073
		2340673	NSVUBJUuWEU_9f0R.U	2340673	PTPRE	protein tyrosine phosphatase, receptor type, E	-0.399332	9.07362	0.00310021	0.0411177	9.28833	8.889				5690066	0hVSs_3.hNSS1Cs_IQ	5690066	XBP1	X-box binding protein 1	0.294458	12.0187	0.0013549	0.0474027	11.7508	12.0996
		3930377	WkEvu3I7SKTp6l1N3k	3930377	TRIM38	tripartite motif containing 38	-0.399118	7.99095	2.00188e-05	0.000924769	8.25977	7.86065				2030594	r5SshFJULFddSC3uHE	2030594	PARVA	parvin, alpha	0.294737	10.332	0.000270276	0.0154582	10.1363	10.4159
		3610630	WSev16s5eh75Uuwje4	3610630	CRBN	cereblon	-0.398443	8.36464	0.000714813	0.0141381	8.47742	8.07898				70364	WqrWeViDqD3fRyDOiE	70364	ARL5A	ADP-ribosylation factor-like 5A	0.29768	7.43346	0.000792376	0.0326528	7.18386	7.47878
		3930750	uV6nvqKBI4hLpzIJH4	3930750	IRAK2	interleukin-1 receptor-associated kinase 2	-0.396741	8.32757	3.00527e-05	0.00127547	8.62477	8.22803				4490687	rgOgStynV2v15FUC4k	4490687	GBGT1	globoside alpha-1,3-N-acetylgalactosaminyltransferase 1	0.29854	8.8764	0.000671096	0.029139	8.64032	8.92104
		2850537	EVSp6JRCjFdH_TiieA	2850537	TBC1D9B	TBC1 domain family, member 9B (with GRAM domain)	-0.395955	8.77174	0.000197464	0.00531865	9.00741	8.61146				6200692	6txq5SNLKl7j9e0u10	6200692	FOXO3	forkhead box O3	0.298935	10.6738	0.000395635	0.0200874	10.4164	10.709
		670332	NVr0.zm5iC0usHnkqc	670332	NPEPPS	aminopeptidase puromycin sensitive	-0.39567	9.07724	0.000267212	0.00668944	9.33443	8.93876				2630711	9jhKTJepM0XT6wKnIk	2630711	MCM4	minichromosome maintenance complex component 4	0.299526	7.37188	0.000494049	0.0236664	7.11666	7.56151
		3800369	iQuv5dPl.lE3gvdJJE	3800369	FAM110B	family with sequence similarity 110, member B	-0.395149	8.33826	9.47238e-05	0.00313528	8.47602	8.08087				7380601	ijKPXwjvFFSqlEJSXk	7380601	ERMP1	endoplasmic reticulum metallopeptidase 1	0.299715	7.84152	0.000335081	0.0177765	7.6928	7.7856
		1850564	xX6nkjUwofXvfq5Q7U	1850564	LBP	lipopolysaccharide binding protein	-0.395109	11.2174	0.000262946	0.00661912	11.5291	11.134				1570193	Z_6__elQ4tXLRNV5SI	1570193	ARHGDIB	Rho GDP dissociation inhibitor (GDI) beta	0.3004	9.47414	0.000329961	0.0176701	9.21931	9.58171
		6900278	0iEd5d66eSJDFQl0.o	6900278	FYCO1	FYVE and coiled-coil domain containing 1	-0.393979	9.17139	9.48924e-05	0.00313628	9.35871	8.96473				5810253	Qu_z0gAaoio58PpXpk	5810253	POLA1	polymerase (DNA directed), alpha 1, catalytic subunit	0.300606	7.75473	0.000398953	0.0201751	7.52341	7.77371
		870242	oV6Se3UijQJRFQIsKQ	870242	STEAP2	STEAP family member 2, metalloreductase	-0.393823	8.90717	0.000697163	0.0139716	9.04196	8.64813				4250156	r5OgFNEn5e6oUdJe6s	4250156	EBP	emopamil binding protein (sterol isomerase)	0.301712	8.06861	0.000135244	0.00952855	7.85703	8.18197
		770187	HuB6Fe_cJ1pCQ01yso	770187	NA	NA	-0.393735	8.62386	0.00181607	0.0281472	8.9454	8.55167				1780079	unQoCMCepoKK7m6feo	1780079	CD99L2	CD99 molecule-like 2	0.301758	9.90207	0.000668518	0.0291351	9.69973	9.9489
		240064	9WQUXkBSBh3IP19VlU	240064	ETV6	ets variant 6	-0.39304	8.49968	3.39941e-06	0.000229042	8.60699	8.21395				4480152	WrlIsC.cAwT13R_xVE	4480152	OGN	osteoglycin	0.302344	8.31142	0.00141605	0.0489387	8.02585	8.35317
		5570433	T_HqiKToggHdPSqdSg	5570433	PTGFR	prostaglandin F receptor (FP)	-0.39301	8.01473	0.00355183	0.0451809	8.08889	7.69588				7200168	xinjtCRRFUFUm3bi1g	7200168	PDGFRL	platelet-derived growth factor receptor-like	0.304339	11.2708	0.000160042	0.0108152	10.9412	11.3714
		360259	6hOi5K6Ee7ge._tLz4	360259	TROVE2	TROVE domain family, member 2	-0.392578	9.11716	0.000392228	0.00904155	9.30089	8.90831				5080619	Q7mVIU1KOCKpX7vlVE	5080619	SULT1A3	sulfotransferase family, cytosolic, 1A, phenol-preferring, member 3	0.30485	7.61861	0.000901416	0.035694	7.43284	7.68508
		450491	9WQr2P9P4klI6yJkjk	450491	CASP1	caspase 1, apoptosis-related cysteine peptidase	-0.392542	7.74368	5.48365e-05	0.00203119	7.93552	7.54298				5270605	TWtddPKuSpcrd9Quqg	5270605	RASA4CP	RAS p21 protein activator 4C, pseudogene	0.306229	7.40276	0.00128051	0.0457158	7.26959	7.4816
		4120039	BZWDenaaDF3yEJEV6o	4120039	FTH1P2	ferritin, heavy polypeptide 1 pseudogene 2	-0.392361	12.774	7.38309e-05	0.00256723	13.0623	12.6699				870546	TqCLahRL88UPeKC1l8	870546	MAD2L1	MAD2 mitotic arrest deficient-like 1 (yeast)	0.306457	7.64846	0.000687818	0.0297478	7.39013	7.82022
		6550204	HrRegSt1Dc7yRzunSU	6550204	RSPO3	R-spondin 3	-0.392131	8.89302	0.000325459	0.00775433	9.03476	8.64263				6420739	6n6Sz9J6eig_iApVBQ	6420739	PGM3	phosphoglucomutase 3	0.306576	8.75947	0.000280066	0.0158396	8.53746	8.91778
		6580689	NXSh_QAat0k5fVIlOI	6580689	ARSD	arylsulfatase D	-0.391291	8.80802	0.000118457	0.00366941	8.87469	8.4834				2640014	QAlidLxTKhK1F3HqV0	2640014	PLEKHG4	pleckstrin homology domain containing, family G (with RhoGef domain) member 4	0.307085	7.55131	0.000226056	0.0137242	7.26276	7.61175
		4200240	6nGQ7l7rVHDe4ede6A	4200240	SP100	SP100 nuclear antigen	-0.390862	7.29146	1.70643e-05	0.000826143	7.52154	7.13068				3170286	cV.XdXSD_7_eXc37.8	3170286	NA	NA	0.307144	12.9097	0.000171836	0.0113832	12.6943	13.1029
		6980474	66I09TxHUl6kUoGAds	6980474	ZNF160	zinc finger protein 160	-0.390269	8.96947	4.25179e-05	0.00167898	9.10141	8.71114				2340524	fHE9Fg9QglqK9JLXpU	2340524	ALG14	ALG14, UDP-N-acetylglucosaminyltransferase subunit	0.307154	7.57658	0.000825134	0.0338186	7.30583	7.65408
		5700707	BvwUf55wj.ltU9U..U	5700707	SPRED1	sprouty-related, EVH1 domain containing 1	-0.389963	9.16128	0.000879133	0.0165425	9.48303	9.09307				520292	Q4dLhS5e4k6pSgLesM	520292	MC1R	melanocortin 1 receptor (alpha melanocyte stimulating hormone receptor)	0.307723	7.86473	0.000409389	0.0205927	7.59429	7.79559
		5720735	QeUV54t73rDarMMp3k	5720735	JAG1	jagged 1	-0.389933	8.57375	1.20166e-05	0.000633059	8.64542	8.25548				540411	l1KHvzJ76Chyt9XJVU	540411	NA	NA	0.308095	7.16682	0.000278315	0.0157985	6.96318	7.26971
		4070719	rma6Gv6ZUUpjQx.o.8	4070719	C15orf48	chromosome 15 open reading frame 48	-0.389393	8.03536	2.26142e-05	0.00101881	8.34246	7.95307				20195	3oeDevdd_xFXQVzkl4	20195	SUV39H1	suppressor of variegation 3-9 homolog 1 (Drosophila)	0.308723	7.84797	0.00130945	0.046242	7.63179	7.95939
		4900168	op7uVS.iC6_ShD8FNs	4900168	TSPAN5	tetraspanin 5	-0.389297	8.9939	0.00162084	0.0261193	9.1322	8.7429				4070241	rf.W7q68MNtLdoqYp0	4070241	GYG2	glycogenin 2	0.309092	7.58542	0.000764063	0.0318723	7.3846	7.62068
		1400592	TZeN.gBHESp57R9UqU	1400592	LRRC32	leucine rich repeat containing 32	-0.389229	8.29463	0.000324915	0.0077495	8.33701	7.94778				5550500	K_J4XeF0fV7JC9fK14	5550500	MXRA7	matrix-remodelling associated 7	0.31146	8.70598	0.000906158	0.0357603	8.49567	8.75736
		3400709	9YWnbPWNLZ9T7yTbEY	3400709	NACC2	NACC family member 2, BEN and BTB (POZ) domain containing	-0.388344	8.39755	0.000526686	0.0113355	8.6488	8.26046				1740291	Wpt9ozfdFzvV6cILSI	1740291	TMSB15A	thymosin beta 15a	0.312005	7.15228	0.000131889	0.00941859	6.91236	7.23141
		4260142	3o9516f595p9rohLzo	4260142	DHX37	DEAH (Asp-Glu-Ala-His) box polypeptide 37	-0.388303	8.42824	0.000194448	0.00526865	8.54707	8.15877				1240523	lFaZ1PAyWyGgfZf3do	1240523	RPL41	ribosomal protein L41	0.312344	7.59775	0.000607288	0.0274084	7.41495	7.67602
		770551	3.h6oik6IIB3T0qnUo	770551	PTGFR	prostaglandin F receptor (FP)	-0.38748	7.74465	0.00202622	0.030507	7.86666	7.47918				3140008	ZdTpXaWfkVnd77Ef0M	3140008	NA	NA	0.313373	10.7522	0.000268904	0.0154185	10.5652	10.8385
		4490072	6d66qdeNZNQnwUKdQw	4490072	GFRA2	GDNF family receptor alpha 2	-0.386734	8.17032	0.000122104	0.00375534	8.36264	7.97591				7000735	le9Y.l3iBjdUg6CiYo	7000735	RANBP1	RAN binding protein 1	0.314243	9.58718	0.000550787	0.0256274	9.36854	9.72954
		1230470	WkKX3dSHNsF65fFC_4	1230470	RHOU	ras homolog family member U	-0.38655	9.39386	2.00382e-05	0.000924769	9.47536	9.08881				1470195	lekrQ59WhGjR.7ePUk	1470195	MCM7	minichromosome maintenance complex component 7	0.314607	10.6653	0.000418306	0.0208749	10.4281	10.7637
		5860152	T4Ue8_8f4f9IkRX13o	5860152	CD44	CD44 molecule (Indian blood group)	-0.386334	12.0126	9.75374e-05	0.00320504	12.1217	11.7354				1510296	HDlHhX3lZGeFRxC0ns	1510296	ASNS	asparagine synthetase (glutamine-hydrolyzing)	0.314873	10.5852	0.000129815	0.00938718	10.2841	10.5543
		4590370	oKl7qJeQHR50IIToh0	4590370	SLC2A1	solute carrier family 2 (facilitated glucose transporter), member 1	-0.385286	11.2743	0.000105353	0.0033931	11.5873	11.202				7550167	lrynlU1RXHe7p5.f64	7550167	SV2A	synaptic vesicle glycoprotein 2A	0.315541	7.09899	0.000171956	0.0113832	6.95544	7.16209
		4390327	9lWeuR4IlFe6ARxN5A	4390327	CLTA	clathrin, light chain A	-0.385212	10.7518	5.07948e-05	0.00190952	10.8919	10.5067				3800474	QXnojsD_U4fXooSSTo	3800474	ZWINT	ZW10 interacting kinetochore protein	0.316378	7.39347	0.000337289	0.0178519	7.084	7.52112
		1500524	fvtJ91V9Je.eSSUq90	1500524	PHC2	polyhomeotic homolog 2 (Drosophila)	-0.384809	8.65217	0.000201542	0.00540923	8.91023	8.52542				4640500	ipJcOd7qKh.nj9V31c	4640500	UCHL1	ubiquitin carboxyl-terminal esterase L1 (ubiquitin thiolesterase)	0.316382	7.48838	0.00030143	0.0167284	7.2929	7.59586
		3780681	KedHu197rdKJ5L7574	3780681	MBP	myelin basic protein	-0.38476	7.5679	5.05767e-06	0.000312914	7.76577	7.38101				6480204	leKQlOi4hUoloR90oA	6480204	THY1	Thy-1 cell surface antigen	0.316521	12.1344	0.000260837	0.0151331	11.8016	12.1922
		3800647	9CeiB62cSPGe6qxJIo	3800647	UGCG	UDP-glucose ceramide glucosyltransferase	-0.38455	9.21187	0.000758982	0.0146793	9.44165	9.0571				6550754	NSdbVSZ0674B7e05FE	6550754	EVL	Enah/Vasp-like	0.318567	10.0576	0.000919631	0.0360357	9.87157	10.0692
		1300743	Zhsfhe6FeOShJSh900	1300743	IAH1	isoamyl acetate-hydrolyzing esterase 1 homolog (S. cerevisiae)	-0.384174	10.2326	5.66301e-05	0.00208402	10.2522	9.86805				60504	ZFPkAtX9aqnX7Lhnko	60504	CTBS	chitobiase, di-N-acetyl-	0.319787	8.77492	0.00107187	0.0402277	8.53544	8.83993
		6480037	upLKdwurh6USliAKsQ	6480037	PLA2G15	phospholipase A2, group XV	-0.384047	8.35832	6.3295e-05	0.00226788	8.47308	8.08903				240086	WUT36ngZqXeEefEeR0	240086	PHGDH	phosphoglycerate dehydrogenase	0.31995	12.1487	0.000880961	0.0352512	11.8483	12.138
		2070088	NUU4V31054Hk9fVQ0U	2070088	HLA-G	major histocompatibility complex, class I, G	-0.383662	8.07336	5.69392e-05	0.00208526	8.35048	7.96682				6840577	Z0g_kkQIAZXdeH7Puk	6840577	KPNB1	karyopherin (importin) beta 1	0.321725	10.7201	0.0014533	0.049847	10.5112	10.7913
		4290431	NoSEsN17je5ye4pJ3o	4290431	DPYSL3	dihydropyrimidinase-like 3	-0.38315	11.2425	2.97913e-05	0.00126912	11.2983	10.9151				3930324	Z95JJ6aHY50CKHmXWI	3930324	CENPM	centromere protein M	0.322426	7.0962	0.000424715	0.0210537	6.82131	7.19349
		6860377	EkgiAodLu41r9._dlU	6860377	DUSP1	dual specificity phosphatase 1	-0.383044	11.2304	1.22922e-05	0.000641627	11.4113	11.0283				510487	K65pzoh7egp_g6.Pnw	510487	TFDP1	transcription factor Dp-1	0.322566	9.58432	4.86802e-05	0.00443909	9.39486	9.72269
		1940487	rlO55uXug3ouKrAJ40	1940487	STAT5A	signal transducer and activator of transcription 5A	-0.381887	8.7144	6.48617e-05	0.00230839	8.81709	8.4352				4880433	3gRRofXYRTQiQXoSJU	4880433	IDH2	isocitrate dehydrogenase 2 (NADP+), mitochondrial	0.323424	8.76891	0.000902331	0.035694	8.48398	8.86935
		5690408	BgU3oZZXrfNp3ddNcs	5690408	IRX3	iroquois homeobox 3	-0.381315	9.585	5.03655e-05	0.00189652	9.77062	9.38931				7550161	inVLZ4uXiWoJL57rF4	7550161	ADK	adenosine kinase	0.323759	8.47053	0.00126256	0.0452888	8.25073	8.56047
		4860066	oPTe91L4KTgvvlL97M	4860066	NA	NA	-0.380914	8.17238	0.000327782	0.0078015	8.3609	7.97999				7550192	uV.m.kub.HQslIBFUY	7550192	SLC16A10	solute carrier family 16 (aromatic amino acid transporter), member 10	0.324218	7.42713	0.000416172	0.020835	7.24385	7.48943
		2650564	opRpn6DXr756Od.5jw	2650564	RARRES3	retinoic acid receptor responder (tazarotene induced) 3	-0.380897	10.1464	0.00072407	0.0142221	10.4278	10.0469				5310278	KeeRO8i1Vi3dZ1Cujg	5310278	PABPC4	poly(A) binding protein, cytoplasmic 4 (inducible form)	0.324603	10.6861	0.000885618	0.0353407	10.4871	10.796
		20156	QfQKRJKSDipRKSi67o	20156	SDHAF2	succinate dehydrogenase complex assembly factor 2	-0.380853	10.4604	0.000147781	0.00426909	10.6157	10.2348				2970296	ZQ91Q4l.7e6gCSiGfY	2970296	ALG8	ALG8, alpha-1,3-glucosyltransferase	0.324724	8.98272	0.00070462	0.0303444	8.7347	9.12194
		6100521	fctt136XSSd9XvfHr4	6100521	PHF11	PHD finger protein 11	-0.380736	10.5656	0.00013593	0.00402929	10.8688	10.4881				4120278	BSeoXozSTRkQVCZACU	4120278	KIF23	kinesin family member 23	0.326005	7.36408	4.8558e-05	0.00443909	7.10757	7.47845
		3180661	9nafbZ5QXnvevX5Ph0	3180661	FAM134B	family with sequence similarity 134, member B	-0.380729	9.27587	0.000450734	0.0100435	9.43697	9.05625				4390703	iFeSJzriu6MKfK5Sns	4390703	PTPN1	protein tyrosine phosphatase, non-receptor type 1	0.326419	9.31366	0.000248846	0.0147527	9.0236	9.40627
		3940392	Qd3CE93iu7igtHHXJc	3940392	PRUNE2	prune homolog 2 (Drosophila)	-0.380333	11.3921	6.138e-06	0.000368484	11.5405	11.1601				630100	W393IZt_eoi7W_fVtY	630100	SNX5	sorting nexin 5	0.327219	8.49912	0.000758991	0.0317797	8.37269	8.59321
		3710678	0iWqWFZRzWSSXaUopg	3710678	PPAP2B	phosphatidic acid phosphatase type 2B	-0.379929	7.50495	0.000102551	0.00333123	7.58798	7.20805				630364	Brr6jN53eo6TS_pLTc	630364	PCGF6	polycomb group ring finger 6	0.327587	8.21055	0.000730176	0.0311642	7.97734	8.33704
		1580338	0Xn_ie7DpJgE7J7f70	1580338	KANSL1	KAT8 regulatory NSL complex subunit 1	-0.379902	8.46288	4.03918e-05	0.00160619	8.7127	8.33279				3710039	WoKko7FXgFo54sV4Ok	3710039	MRPL54	mitochondrial ribosomal protein L54	0.327593	10.0018	0.00104665	0.0397412	9.79016	10.1165
		5050577	oCd7geXnte4Hl55XuI	5050577	PNPLA7	patatin-like phospholipase domain containing 7	-0.378861	8.67003	0.00191478	0.0294095	8.7526	8.37374				5720438	35QRHIUd.o9CJHuzh4	5720438	GPX8	glutathione peroxidase 8 (putative)	0.328713	9.94693	0.00106732	0.0401913	9.68165	10.0834
		1660047	WVONp1S5FV8KsJKUTM	1660047	SNX29	sorting nexin 29	-0.378763	7.68898	4.07479e-06	0.000262102	7.78847	7.4097				5420136	N6fAOx3X.O63f6pY_o	5420136	NA	NA	0.328783	12.1027	0.000115362	0.00850458	11.8164	12.1966
		5290246	cR9RTs8Qt_FTV7bB1I	5290246	XPR1	xenotropic and polytropic retrovirus receptor 1	-0.378755	8.54385	0.00080475	0.0153581	8.65053	8.27178				7000743	lKR6E10bovRKdNLg94	7000743	ZWILCH	zwilch kinetochore protein	0.329734	8.19682	8.86951e-05	0.00699275	7.9294	8.34327
		2600070	WUI4XU92khcIvl3i8k	2600070	RAB38	RAB38, member RAS oncogene family	-0.378678	8.81879	0.000320834	0.00766828	9.00918	8.6305				6060612	9jUT7yueFyEiOB4rX4	6060612	COL1A2	collagen, type I, alpha 2	0.330539	12.344	0.000924939	0.0361474	12.1574	12.5631
		650092	TkeKM9I7O5X30RIRwY	650092	MMP13	matrix metallopeptidase 13 (collagenase 3)	-0.378606	10.8705	0.0018621	0.0287625	11.064	10.6854				6980382	0d83FzheYnlRRVS__Y	6980382	GTSE1	G-2 and S-phase expressed 1	0.330779	7.36541	0.000124791	0.00911095	7.12567	7.4748
		6770376	izRD5RU2r.q7u.0ybo	6770376	NSMAF	neutral sphingomyelinase (N-SMase) activation associated factor	-0.378315	8.77746	1.93659e-05	0.00090478	8.92479	8.54648				2070243	ZRIikoaSJTj9UWJjxg	2070243	SLC2A4RG	SLC2A4 regulator	0.330858	8.14233	0.0011865	0.0429674	7.92309	8.31154
		1740497	r_dQ6fDuAJ15Iwuhe0	1740497	RAB8B	RAB8B, member RAS oncogene family	-0.378198	8.33024	0.000596662	0.0124692	8.59876	8.22056				4850307	uXf_OXCSsJI5cJ7P3U	4850307	NA	NA	0.33119	8.09158	0.00137166	0.0479154	7.90054	8.2099
		1050309	0Tqer.ufHs76YfrKko	1050309	HLX	H2.0-like homeobox	-0.37756	7.42831	4.83171e-05	0.00184695	7.6012	7.22364				6130168	irV5fKXF46CwJdBRAA	6130168	GSTM2	glutathione S-transferase mu 2 (muscle)	0.331306	9.46456	0.00127621	0.0456339	9.13295	9.36226
		7040132	rS90d3wOsXQAnol3eU	7040132	ANKRD12	ankyrin repeat domain 12	-0.376996	8.41131	9.04093e-05	0.00301002	8.69542	8.31843				2650349	iURFSiCujC6nFCp9eQ	2650349	C19orf48	chromosome 19 open reading frame 48	0.332051	7.79459	0.000131908	0.00941859	7.5198	7.9067
		7160626	93b3M3TRJlJXv.JaAo	7160626	PPP2R5E	protein phosphatase 2, regulatory subunit B', epsilon isoform	-0.376015	9.46616	0.0019525	0.029794	9.54683	9.17081				6860131	6JKSi6oSKiJ_4eoS4A	6860131	HNRNPUL2	heterogeneous nuclear ribonucleoprotein U-like 2	0.332074	9.39999	0.00129142	0.0459609	9.0783	9.45208
		7400653	inpuVO_SM.1YvVSDo4	7400653	PFKFB4	6-phosphofructo-2-kinase/fructose-2,6-biphosphatase 4	-0.375899	10.331	0.00139485	0.0233389	10.7486	10.3727				6020280	Hr.Uil7.qn9UogI4B4	6020280	NRAS	neuroblastoma RAS viral (v-ras) oncogene homolog	0.332486	7.7473	0.000151585	0.0103711	7.51044	7.844
		2680189	ZumFCGP95fIkKj0V1k	2680189	LAG3	lymphocyte-activation gene 3	-0.375612	8.9768	0.00191694	0.0294095	9.05728	8.68166				5360398	QUUF7M0JdflUQJ9QJU	5360398	ERI1	exoribonuclease 1	0.332887	8.55433	0.00119904	0.0432835	8.31914	8.65312
		1690681	HS7dLf.5YgJEst6h6k	1690681	TNFAIP1	tumor necrosis factor, alpha-induced protein 1 (endothelial)	-0.375302	8.40821	0.000685749	0.0137793	8.59732	8.22202				3130541	u2q4gVCb6B7IVte2Hs	3130541	CCNF	cyclin F	0.334714	7.60973	1.48535e-05	0.00184297	7.44252	7.79062
		160224	xleUhmcj13Ct3iORb8	160224	CLEC16A	C-type lectin domain family 16, member A	-0.374869	8.63579	0.000252625	0.00641623	8.72833	8.35346				4830634	o7h_frpdPU7uXuXqk4	4830634	CDCA8	cell division cycle associated 8	0.335437	7.51413	0.000163296	0.0109966	7.23509	7.66017
		2230379	WbfQoVL541QQCtQAqU	2230379	NAMPT	nicotinamide phosphoribosyltransferase	-0.374329	9.5455	0.00186974	0.0288608	9.67752	9.30319				6100673	QIKPOKK_iSMueGiKOI	6100673	TUBA1C	tubulin, alpha 1c	0.335702	12.175	0.000737558	0.0313028	11.9526	12.262
		3520259	ZNn6kovIhSXqQzKgFU	3520259	LOC730202	uncharacterized LOC730202	-0.374241	8.48159	4.39304e-05	0.00172277	8.64772	8.27348				1780324	0giO7CAnTnnMYiLUt4	1780324	NA	NA	0.336097	8.64104	0.000537049	0.0251846	8.46794	8.69349
		1170246	BVU_ySonJs8l_6kE44	1170246	GEM	GTP binding protein overexpressed in skeletal muscle	-0.37404	9.15089	0.00067578	0.0136272	9.3137	8.93966				5910689	9r8Uo7LVHviiTc.Krw	5910689	SMC4	structural maintenance of chromosomes 4	0.336122	8.10655	0.000212932	0.0131739	7.84199	8.24375
		7000086	olSgryO7_QML5UCrVU	7000086	KCTD20	potassium channel tetramerization domain containing 20	-0.372863	9.38334	0.00264698	0.0369314	9.43119	9.05833				5130497	oSbQYvQInrxUkvlU3k	5130497	S100A13	S100 calcium binding protein A13	0.336282	11.4117	0.000650708	0.0286893	11.054	11.4918
		2470762	cXXV01fUF.ExNEg0FA	2470762	SECISBP2L	SECIS binding protein 2-like	-0.372819	9.62296	0.000363848	0.00849951	9.81556	9.44274				2570091	lqu3kUXqCMkQpcOK0U	2570091	PHF19	PHD finger protein 19	0.336862	9.07559	0.000831164	0.0339965	8.78755	9.14915
		2450187	3NRFCKu_44rlruQKgc	2450187	GPD1L	glycerol-3-phosphate dehydrogenase 1-like	-0.372303	7.80379	1.66998e-05	0.000811962	7.85398	7.48167				1660161	oERC63oTirEv3lxQhE	1660161	SLC2A12	solute carrier family 2 (facilitated glucose transporter), member 12	0.336971	8.6048	3.32642e-05	0.0033127	8.32568	8.68417
		6110091	9e.eSqOM_uL5QIJDEk	6110091	WSB1	WD repeat and SOCS box containing 1	-0.372235	8.00837	0.000900465	0.0168279	8.25625	7.88402				2100484	rl3XubOoEXJG56Op5c	2100484	STAT3	signal transducer and activator of transcription 3 (acute-phase response factor)	0.337563	9.05905	0.00115938	0.042597	8.87091	9.12779
		2680722	3XA73lxXvrMCM.4kh4	2680722	HIF1A	hypoxia inducible factor 1, alpha subunit (basic helix-loop-helix transcription factor)	-0.371796	7.8917	0.000712168	0.0141153	8.11074	7.73894				6560458	KI0p3kfNJa1.ukGSV4	6560458	GALNT16	UDP-N-acetyl-alpha-D-galactosamine:polypeptide N-acetylgalactosaminyltransferase 16	0.338699	7.6307	0.000182572	0.0118319	7.30308	7.69211
		1190367	uihtWnqOC3rrq2wvyg	1190367	IER3	immediate early response 3	-0.371613	12.1539	0.000221253	0.00581643	12.3989	12.0273				1820386	HBHbn5v4Jdm0dLZuo4	1820386	PARVB	parvin, beta	0.339308	8.11161	0.000591603	0.0269197	7.9536	8.21684
		7570209	HcE_0X3oiIvDqqT4o4	7570209	ARMC1	armadillo repeat containing 1	-0.370091	7.95309	0.000889256	0.0166734	8.1646	7.79451				7320386	Bu.09EuinE0JCqK1JU	7320386	TTL	tubulin tyrosine ligase	0.339875	9.10046	0.000975035	0.0377157	8.94482	9.24814
		5690347	TXw.koeX66f7_eoQpU	5690347	TPST2	tyrosylprotein sulfotransferase 2	-0.369952	8.67291	1.51165e-05	0.000752711	8.89108	8.52113				5820324	Hx_d9eadxWudFCmlFI	5820324	PXMP2	peroxisomal membrane protein 2, 22kDa	0.340167	7.89354	0.000572821	0.0264359	7.6637	7.97514
		7570358	Tf6QkorhHI6e4O41nQ	7570358	NPC1	Niemann-Pick disease, type C1	-0.369175	10.4218	4.85552e-05	0.00184951	10.5317	10.1625				6250563	xd6Z60LRKEWCAU0bEY	6250563	EFEMP1	EGF containing fibulin-like extracellular matrix protein 1	0.342342	12.062	0.00103822	0.03962	11.7793	12.0902
		6650100	QWLktdX6zcvUoVe6MU	6650100	WDR36	WD repeat domain 36	-0.36845	8.30994	0.000543036	0.0116213	8.53886	8.17041				60196	u6SequpltbGeZHoVnc	60196	GCSH	glycine cleavage system protein H (aminomethyl carrier)	0.342491	8.42496	0.000640251	0.0283383	8.17886	8.54518
		6940709	l.3_ISrf3eR1JcpBIk	6940709	ICA1L	islet cell autoantigen 1,69kDa-like	-0.368417	9.01124	0.000568785	0.0120587	9.17927	8.81085				4560139	Qg7RNZUhJ3_OKuOoHg	4560139	CNOT6	CCR4-NOT transcription complex, subunit 6	0.344294	7.72024	0.000176399	0.0115427	7.5008	7.81581
		7550437	WqpW9VIJ5S5.SOT4d8	7550437	NA	NA	-0.368395	8.3125	0.000639327	0.0131016	8.52593	8.15754				5900482	Q5K_yf.jqcdMS8j.Ek	5900482	HMGB2	high mobility group box 2	0.344717	7.78628	0.0003028	0.0167284	7.52872	7.92982
		150494	cZV_UAlAUtUde0_hv0	150494	NTN1	netrin 1	-0.368134	7.91613	0.000103079	0.00333883	8.07689	7.70876				6270452	KmuIV6TRhCDUceNE6E	6270452	KNSTRN	kinetochore-localized astrin/SPAG5 binding protein	0.344761	7.38704	0.000103892	0.00788953	7.10687	7.50172
		5910064	rnkqtLjonn0q7o6bTA	5910064	TRIM5	tripartite motif containing 5	-0.368066	7.77651	0.00164992	0.0264383	8.04801	7.67994				3840594	cpN.QldnevdKkk.1KY	3840594	LSM4	LSM4 homolog, U6 small nuclear RNA associated (S. cerevisiae)	0.345019	9.94044	0.000317321	0.0173199	9.72777	10.1583
		1990079	lgq1V54eiJ6gzpP6Ec	1990079	FBXO32	F-box protein 32	-0.367905	10.7079	0.000186384	0.00511867	11.0707	10.7028				450348	WSZ_siSdC_inpuiKNA	450348	GNG10	guanine nucleotide binding protein (G protein), gamma 10	0.345157	10.582	0.00133355	0.0468723	10.3009	10.6361
		1940576	QPfSeXzyi5zirBF73k	1940576	RPS6KB1	ribosomal protein S6 kinase, 70kDa, polypeptide 1	-0.367601	8.45675	0.000724029	0.0142221	8.60002	8.23241				2630209	N8EYzSRPV_000K76dI	2630209	ARL5A	ADP-ribosylation factor-like 5A	0.345268	8.24699	0.000229762	0.0138749	7.9998	8.35393
		460164	36iZWDenaSDN32EJEU	460164	FTH1P11	ferritin, heavy polypeptide 1 pseudogene 11	-0.366862	12.0088	0.0001733	0.00482224	12.2554	11.8885				5420358	T1exN70bn7tSu4fsB4	5420358	CD99L2	CD99 molecule-like 2	0.346505	10.9082	0.000454521	0.0221267	10.6507	10.9256
		2690315	QVJXp6lSZe73u8gK.w	2690315	RNF44	ring finger protein 44	-0.366067	7.33902	2.72895e-05	0.00118026	7.5517	7.18564				6290609	3S3ZjB5kpmhQJjd94o	6290609	RPS15	ribosomal protein S15	0.347152	7.51829	0.000121128	0.00887205	7.30307	7.61624
		1190026	Hkie59ehuPV.6Ceheg	1190026	APOBEC3G	apolipoprotein B mRNA editing enzyme, catalytic polypeptide-like 3G	-0.366018	7.9535	0.000198956	0.00535248	8.05793	7.69192				3850161	K46fTjUkS5dEQIHPq4	3850161	POGLUT1	protein O-glucosyltransferase 1	0.347366	7.92579	0.000284445	0.0159866	7.68063	7.97441
		4250398	B4rSS.s4hMn11PlVHU	4250398	STK4	serine/threonine kinase 4	-0.366007	9.95232	0.00277209	0.0379601	10.112	9.74596				5900433	uUlHrBT33HezlTitD4	5900433	KIF20B	kinesin family member 20B	0.347532	7.5021	0.000221772	0.0135729	7.25657	7.62075
		4490524	cv9_VS0p0JXuvsoMCU	4490524	ACSS2	acyl-CoA synthetase short-chain family member 2	-0.365425	9.03766	3.08793e-05	0.00130567	9.13199	8.76657				3060377	H6ddfnVeeOu1xVgdQA	3060377	MFAP4	microfibrillar-associated protein 4	0.348338	8.35142	3.34799e-05	0.00331962	7.95945	8.25917
		1990253	B.7mrn_C5fk0qPKJDw	1990253	TDG	thymine-DNA glycosylase	-0.36464	8.63282	3.80391e-05	0.00154235	8.86254	8.4979				2630673	i13nKFKuP0JSoJB6hU	2630673	ASF1B	anti-silencing function 1B histone chaperone	0.348515	7.40368	0.000205433	0.0129212	7.06375	7.54974
		4570433	9CStJBNrZChxelRJ1M	4570433	DDX41	DEAD (Asp-Glu-Ala-Asp) box polypeptide 41	-0.364584	9.45268	0.000117146	0.00363874	9.76997	9.40538				3370092	ZQorqdUo6xT539cnBU	3370092	STK39	serine threonine kinase 39	0.351071	8.87219	0.000409932	0.0205927	8.63349	9.05528
		6370500	TXVRJtLgLbX7dIOFKo	6370500	AGRN	agrin	-0.36458	8.28965	0.00209122	0.031157	8.60079	8.23621				6560301	TCl_h31eKvl4D19Of0	6560301	SH2B3	SH2B adaptor protein 3	0.351107	8.33084	0.000113292	0.00841144	8.14895	8.46282
		6290059	iDpdN157X2JtWnsUOg	6290059	ACOT2	acyl-CoA thioesterase 2	-0.36458	8.8293	0.000282586	0.00696677	9.02739	8.66281				5290692	QQ.6Xe4132UNU0lU5I	5290692	SLC35B1	solute carrier family 35, member B1	0.351625	10.7241	0.000608377	0.0274084	10.4579	10.8769
		6650017	915l9eG4leJjfc5L3k	6650017	ATP6V1B2	ATPase, H+ transporting, lysosomal 56/58kDa, V1 subunit B2	-0.364464	11.521	0.000244809	0.00629517	11.7796	11.4152				6550673	uQq5OtQ73SKTq65.7k	6550673	SLC25A5	solute carrier family 25 (mitochondrial carrier; adenine nucleotide translocator), member 5	0.351913	12.2478	7.01283e-05	0.0059638	12.0167	12.3524
		6840020	fcZTqE3D0iggrU7f6o	6840020	TNFSF13B	tumor necrosis factor (ligand) superfamily, member 13b	-0.364017	8.0558	0.000836973	0.0158369	8.21339	7.84937				5340017	TkcLT_R6_i_6IaX4t0	5340017	H19	H19, imprinted maternally expressed transcript (non-protein coding)	0.352104	10.9388	0.00107637	0.0403302	10.6381	11.174
		3460133	iWC39U9H3cgJ5QhIpI	3460133	PAK2	p21 protein (Cdc42/Rac)-activated kinase 2	-0.363999	8.45882	0.000300794	0.00731246	8.72021	8.35621				3870255	HiiPQRRISeSh2M1On0	3870255	DESI2	desumoylating isopeptidase 2	0.352176	8.81827	0.000871262	0.035076	8.63427	8.92538
		3310279	cpHj1hSpFV9InKhgSQ	3310279	TBC1D3G	TBC1 domain family, member 3G	-0.363749	7.7164	0.0017314	0.0274098	7.89384	7.53009				4180050	K63vX_n936K6tkkUjo	4180050	TIMELESS	timeless circadian clock	0.353065	8.39241	3.55006e-05	0.00346722	8.09354	8.55946
		1110373	Bgi_QDtQKuFA4Yldl0	1110373	C15orf48	chromosome 15 open reading frame 48	-0.363402	10.8834	0.000105103	0.00338989	11.2424	10.879				3460132	6fU3p5HUKVXe1.0gRM	3460132	PAQR4	progestin and adipoQ receptor family member IV	0.353686	8.01909	0.00139656	0.0484125	7.69181	8.09178
		2140735	fLlPRR5tep.GIU5CGo	2140735	RALGDS	ral guanine nucleotide dissociation stimulator	-0.363141	10.3481	0.000116024	0.00361377	10.5098	10.1466				5080561	W7DzRUiKvaSpAt6CnU	5080561	BARD1	BRCA1 associated RING domain 1	0.353819	7.43665	0.00017979	0.0117293	7.16555	7.57805
		6370364	3ene_nuE3PU3uLh3_E	6370364	NA	NA	-0.36307	11.0232	0.000119338	0.00369168	11.0865	10.7235				520603	fxYVSp4UUl3RopN87w	520603	NA	NA	0.354828	12.9049	0.000120384	0.0088461	12.6696	13.0148
		270068	QVuVUflxXe15fvPsLk	270068	SMOX	spermine oxidase	-0.363033	9.22857	0.00287774	0.0390101	9.46447	9.10144				5670180	9eHhRVdIkSNKhdGTd8	5670180	TUBG1	tubulin, gamma 1	0.354837	9.83586	0.00078034	0.0323329	9.54467	10.0379
		7040014	ElKvNSCYtVDlxhCEl8	7040014	CRK	v-crk avian sarcoma virus CT10 oncogene homolog	-0.362956	7.93713	0.00057766	0.0121786	8.08265	7.71969				1440709	TVOcePpG6VUQ6RDAlU	1440709	CILP	cartilage intermediate layer protein, nucleotide pyrophosphohydrolase	0.355584	8.9612	0.000491106	0.0235752	8.37443	8.88758
		1230521	93p8SqBEHPUQul.Lnc	1230521	KCNQ3	potassium voltage-gated channel, KQT-like subfamily, member 3	-0.362777	7.8779	0.000157885	0.0044924	8.06334	7.70056				4920070	r1.aWgWU31LD2UA4YE	4920070	RPL21	ribosomal protein L21	0.357129	11.9844	0.00083247	0.0339965	11.7836	12.0498
		6370091	uF7uCSSUl8Cy1PfnDo	6370091	ATP6V1G1	ATPase, H+ transporting, lysosomal 13kDa, V1 subunit G1	-0.362678	11.36	0.000332977	0.00789777	11.5508	11.1882				5860477	uCSh5POkf_X66VH91M	5860477	CANX	calnexin	0.357166	8.53682	0.000130469	0.00940088	8.20862	8.59673
		5080692	KGhlVCGTOHRRnt3hTg	5080692	NA	NA	-0.362433	10.2771	0.00390942	0.0486906	10.6223	10.2599				4570358	ZKBXf11nSI559PxUoo	4570358	CNTNAP1	contactin associated protein 1	0.357227	8.54511	0.00053796	0.0251846	8.20318	8.5528
		3370736	BE4SkcobeX.wpL1vCo	3370736	SOX4	SRY (sex determining region Y)-box 4	-0.362422	9.94313	0.000319624	0.00765548	10.1119	9.74943				10370	lCiieaASejheCuie1Q	10370	NA	NA	0.357233	11.7761	0.00026742	0.0153722	11.5471	11.8388
		3060008	9UKADq_n6h6iICgsRU	3060008	C2CD4B	C2 calcium-dependent domain containing 4B	-0.362299	7.22972	0.000514649	0.0111398	7.39966	7.03736				2340326	BIKKJ54BJ6GF4K6J7U	2340326	NA	NA	0.357348	12.6697	2.93498e-05	0.00301545	12.4079	12.7208
		4060576	9JVJ533Khc6pfbpN3s	4060576	SLC35D2	solute carrier family 35 (UDP-GlcNAc/UDP-glucose transporter), member D2	-0.361979	8.13093	1.88145e-05	0.000889144	8.18317	7.82119				4780129	cUuKnkp9ciu5zFObe0	4780129	CENPF	centromere protein F, 350/400kDa	0.357436	7.46264	0.000305904	0.0168333	7.22804	7.5992
		830278	TknXgre75HtFLdCc5c	830278	GLIPR2	GLI pathogenesis-related 2	-0.361845	8.18693	8.65301e-05	0.00291519	8.24923	7.88739				6330647	Tnv1l35faGWj.hud2Y	6330647	RPS7	ribosomal protein S7	0.358363	9.0747	0.00042024	0.0208796	8.87603	9.18598
		4120707	TjqRSXS7wqS6QJiLNc	4120707	COL4A3BP	collagen, type IV, alpha 3 (Goodpasture antigen) binding protein	-0.361531	8.21419	0.00081684	0.0155206	8.46405	8.10251				1740706	WuRw0SV__JDS308p1U	1740706	NA	NA	0.358833	7.64887	0.000944779	0.036788	7.46814	7.76915
		3870543	rtyX5WJ.XxDSJV3Rfs	3870543	PUM1	pumilio RNA-binding family member 1	-0.361301	10.5079	0.000129566	0.00391735	10.5871	10.2258				7330292	0Tvqnfodd6OFbVQL4Q	7330292	FBLN2	fibulin 2	0.360126	8.06731	2.62268e-05	0.002863	7.69447	8.03114
		1430598	Qn16OIImkv24mF0kvE	1430598	FBXO32	F-box protein 32	-0.361207	9.54098	0.0027253	0.0376403	9.91179	9.55058				3830327	cFcSl0vX5IriqyItJc	3830327	MGLL	monoglyceride lipase	0.361305	8.03775	5.46383e-05	0.00484616	7.76357	8.22145
		7320148	Ep7FbYOi.43Z4v6L6o	7320148	ZNF419	zinc finger protein 419	-0.361153	8.55566	0.000142914	0.00417095	8.71268	8.35152				3190452	3F3V.qj8O3rnll4v0I	3190452	DNAJB11	DnaJ (Hsp40) homolog, subfamily B, member 11	0.362893	10.7305	0.000135547	0.00952855	10.4754	10.9245
		3400450	Qfoc5Ut2vUvcfUkgqk	3400450	CHKB	choline kinase beta	-0.360698	9.36373	1.7969e-05	0.000857152	9.65722	9.29652				130086	WfSqyq5bS99DSekRH4	130086	CYB561	cytochrome b561	0.363286	7.97288	0.000218711	0.0134582	7.72325	7.96724
		1010465	uCje7y1eo6dQpedygo	1010465	MICU1	mitochondrial calcium uptake 1	-0.360284	8.25925	7.33736e-05	0.00255917	8.34027	7.97999				450292	iiipihinwAfdI0NuTU	450292	TUBB2A	tubulin, beta 2A class IIa	0.364428	9.57496	0.000759993	0.0317797	9.32559	9.80946
		2600463	B8p.nM1UpQMk7hEoSU	2600463	TNFRSF10B	tumor necrosis factor receptor superfamily, member 10b	-0.360218	10.0402	6.45917e-05	0.00230238	10.2319	9.87171				1070762	rXg2T3ceh3pefoiukk	1070762	PSRC1	proline/serine-rich coiled-coil 1	0.36494	7.83798	0.000331912	0.017691	7.61081	7.93312
		5420767	xLpTyx7iTgX4rCrqDk	5420767	PRUNE2	prune homolog 2 (Drosophila)	-0.359935	8.02296	0.00125409	0.0217038	8.19899	7.83905				1400689	0g7h0IdiljGKe495f4	1400689	JAM3	junctional adhesion molecule 3	0.36514	10.1892	0.000546652	0.0254872	9.89181	10.3566
		4610543	HQpQmhIqlOr7KPigaA	4610543	TLE1	transducin-like enhancer of split 1 (E(sp1) homolog, Drosophila)	-0.359867	7.92401	0.000297284	0.00724264	8.12729	7.76742				2140400	ENi1xDnFd1tTS_siBE	2140400	NA	NA	0.365382	11.1057	0.00117588	0.0428565	10.8659	11.3089
		3170132	Tele0e66NLoXngtHoc	3170132	ENAH	enabled homolog (Drosophila)	-0.359669	9.32332	0.000904449	0.0168811	9.38044	9.02077				1740343	HOolP5CjkGgi16mgoo	1740343	PCSK5	proprotein convertase subtilisin/kexin type 5	0.36539	7.94547	0.000843653	0.0342683	7.72928	7.94508
		1440452	9tIudLlBUKj39SIbFY	1440452	N4BP2L2	NEDD4 binding protein 2-like 2	-0.35855	9.26699	0.00012566	0.003835	9.40798	9.04943				3140110	WQ1fJHj48iK1VAgFHo	3140110	TPGS2	tubulin polyglutamylase complex subunit 2	0.365684	8.55146	6.49151e-06	0.00103074	8.23985	8.68562
		5290148	WXunv9W3K90Ss3XhIo	5290148	GPT2	glutamic pyruvate transaminase (alanine aminotransferase) 2	-0.35811	9.88046	0.000834508	0.0158034	10.0194	9.66134				2340528	ll_NSfykuIV6TRhCDU	2340528	KNSTRN	kinetochore-localized astrin/SPAG5 binding protein	0.366284	7.45335	0.00026126	0.0151331	7.23658	7.61032
		7570195	Nh7uCW.u63U7K57vVo	7570195	KIAA0355	KIAA0355	-0.35743	9.47099	0.000186433	0.00511867	9.68315	9.32572				6330494	ooufegc0lR_FFS.ugk	6330494	DUT	deoxyuridine triphosphatase	0.366682	7.6119	7.83685e-05	0.0064847	7.2915	7.71802
		5550037	cfMedTfVaUTlWULHkQ	5550037	CNN2	calponin 2	-0.357271	10.6039	4.86285e-05	0.00184951	10.6744	10.3172				1090577	0VTO3tX6Mq4p4JFKiA	1090577	VPS25	vacuolar protein sorting 25 homolog (S. cerevisiae)	0.367124	8.92081	0.000386348	0.0198005	8.62554	9.02373
		3890402	BeSiqdKBepNXepShlg	3890402	SLC25A24	solute carrier family 25 (mitochondrial carrier; phosphate carrier), member 24	-0.356969	7.67166	0.00285292	0.0387431	7.95538	7.59841				2360148	uIoc4hU0nmkJcqFKuI	2360148	COMP	cartilage oligomeric matrix protein	0.367254	12.9037	4.50376e-05	0.00420833	12.4901	12.9297
		5810373	TTVSIXfu9eUTJ5Sp8I	5810373	FAM127B	family with sequence similarity 127, member B	-0.356659	9.27417	7.60018e-05	0.00263795	9.31576	8.9591				6520139	Z0VAWkrmP_8FSYYH9Y	6520139	FGFR3	fibroblast growth factor receptor 3	0.367373	9.18117	0.000331213	0.017691	8.78204	9.38499
		630332	0eCamjRCtKE2AU168E	630332	ZNF773	zinc finger protein 773	-0.356301	8.4511	0.000133399	0.00398463	8.65117	8.29487				1660673	976d4p59p0Cpg3UlrI	1660673	MGARP	mitochondria-localized glutamic acid-rich protein	0.369553	8.74586	1.30618e-05	0.0017004	8.48559	8.85526
		1980164	HQEQrkkq1QKyejp4Hk	1980164	DHX32	DEAH (Asp-Glu-Ala-His) box polypeptide 32	-0.356216	9.25283	6.20125e-05	0.00223856	9.51186	9.15565				270593	finrhvSX_0MBe07mjU	270593	GPER1	G protein-coupled estrogen receptor 1	0.370788	8.8684	0.000132374	0.00942218	8.55353	8.99743
		1690500	EeIakLr51KPHV11AAo	1690500	PUM1	pumilio RNA-binding family member 1	-0.356142	10.3897	4.96766e-05	0.00187993	10.4514	10.0953				3460307	ruRIs4JL7ome5f7QjE	3460307	TMEM50B	transmembrane protein 50B	0.371401	9.03387	2.83525e-05	0.00295308	8.74507	9.00918
		4200008	oGin.oV2hVNUdJQu38	4200008	ATG2A	autophagy related 2A	-0.355139	8.23337	0.000440166	0.00989546	8.44904	8.0939				1260162	ousTrv7pfp4Tgnvu4o	1260162	DNMT1	DNA (cytosine-5-)-methyltransferase 1	0.372215	10.371	0.000169439	0.0112823	10.0659	10.5681
		2940687	HSIVJI7B3T7JTVAgBU	2940687	TMEM245	transmembrane protein 245	-0.354721	8.34062	5.56419e-05	0.00205098	8.70521	8.35049				5700086	9eebDoPl_ITUgjUFYM	5700086	CENPK	centromere protein K	0.372584	7.23625	4.52268e-05	0.00420869	6.98944	7.39801
		1510196	0R3_RHfu..nR7RPVJE	1510196	PHF11	PHD finger protein 11	-0.354128	10.2196	0.000632379	0.0130298	10.5112	10.1571				510315	ZEiOXHSiuS0F3FG5qI	510315	PSMB5	proteasome (prosome, macropain) subunit, beta type, 5	0.372588	11.1211	8.01953e-05	0.00659752	10.8579	11.2302
		6220441	3g4cUXe3j0X2ej3A7o	6220441	CISD1	CDGSH iron sulfur domain 1	-0.353071	10.8936	0.00127428	0.0220363	11.0015	10.6484				2600154	rX0IVB4kVnePVRJf3U	2600154	HSPB6	heat shock protein, alpha-crystallin-related, B6	0.373345	7.59361	0.000344826	0.0181662	7.27389	7.63772
		6220093	9scP1Olrp.19Tk0dVU	6220093	ATXN7L3	ataxin 7-like 3	-0.3529	8.44971	0.00039716	0.00911822	8.66881	8.31591				2470634	r9LHsz9Fe7DqlV3X90	2470634	PBX3	pre-B-cell leukemia homeobox 3	0.374443	8.88515	2.99719e-05	0.00306551	8.6648	9.04375
		4150519	Tse_fo5pEuvrDoMCjk	4150519	ABHD17C	abhydrolase domain containing 17C	-0.351818	8.62682	0.00175036	0.0275234	8.75297	8.40115				4560110	ipJS5GhY.st50N3vkU	4560110	MANF	mesencephalic astrocyte-derived neurotrophic factor	0.374662	11.1539	0.000321457	0.01742	10.8199	11.3276
		6380743	ivqukS6VAiSfSIw9fo	6380743	STX12	syntaxin 12	-0.351486	8.11412	0.000113833	0.00357001	8.3332	7.98172				7200270	ujaFNp3qg164My55zs	7200270	CHEK1	checkpoint kinase 1	0.374674	7.52292	3.12269e-05	0.00315128	7.21186	7.65146
		650326	HlBzpe6NA1JeeXn.zo	650326	TFAM	transcription factor A, mitochondrial	-0.351408	8.39589	2.55087e-05	0.00111815	8.50083	8.14943				3370487	cmkkomFB42RE5.v6M4	3370487	HNRNPAB	heterogeneous nuclear ribonucleoprotein A/B	0.375616	9.63865	1.08544e-05	0.00147581	9.34522	9.7485
		6200072	indenl.07J0nOkVU4E	6200072	GPR19	G protein-coupled receptor 19	-0.350841	7.4465	0.000103987	0.00336342	7.71622	7.36538				6480082	c3ndZXX_7NC7Z0SVT0	6480082	ARHGAP1	Rho GTPase activating protein 1	0.376878	11.1198	8.35224e-05	0.00674897	10.8292	11.1885
		1230064	6vV9F01t35QHgpx5KU	1230064	NA	NA	-0.350416	7.24578	0.000366975	0.0085462	7.41792	7.06751				5910523	KcV08EPJKkelIv7Fe4	5910523	LMO4	LIM domain only 4	0.37912	11.1928	0.000315363	0.0172546	10.8404	11.2582
		2810504	iJ6LSpD1BQgHmkpauQ	2810504	MAFG-AS1	MAFG antisense RNA 1 (head to head)	-0.350402	7.64669	9.0529e-06	0.000503812	7.90264	7.55224				1850021	9NVUCF94_C07EvS6XA	1850021	SLC25A43	solute carrier family 25, member 43	0.37985	9.33472	0.000387185	0.0198005	9.11208	9.45332
		240682	loJei5cJefslLjlQPg	240682	ANKRD37	ankyrin repeat domain 37	-0.35039	9.25289	0.00074462	0.0144261	9.51985	9.16946				650678	KjupQtR7XX6aQCVPgg	650678	TAGLN	transgelin	0.381383	12.3699	0.000159019	0.0107782	11.8942	12.51
		3440491	ZRVIK937MXnS0vX9HU	3440491	GALC	galactosylceramidase	-0.350158	8.08047	0.0011668	0.020572	8.18723	7.83707				4480176	uAOgFUiKLepKZUq5Oc	4480176	NA	NA	0.381384	9.51793	5.60494e-05	0.00495198	9.30006	9.56607
		1940162	xl7UnV3VQgEE4OJB9I	1940162	GBP2	guanylate binding protein 2, interferon-inducible	-0.350083	10.7118	0.000291874	0.00714439	10.8094	10.4593				6770168	Q1R.KuklLKUB1Ahb54	6770168	CRTAP	cartilage associated protein	0.381594	8.18043	0.000130832	0.00940088	7.87324	8.24404
		4860195	fdOqu36j44HugXl15k	4860195	SLC35A2	solute carrier family 35 (UDP-galactose transporter), member A2	-0.349959	9.71946	0.0001908	0.0051946	9.79886	9.4489				4850180	91ReE7X3iVrCJAIOkg	4850180	LYVE1	lymphatic vessel endothelial hyaluronan receptor 1	0.381841	8.03231	1.65426e-05	0.00198739	7.74988	8.09561
		6590400	N5qUSkq0j4ggkCeqCQ	6590400	XPO5	exportin 5	-0.349918	8.20814	0.000319167	0.00765548	8.34535	7.99544				3060703	Kbi2l5Tv1O5T98Vfso	3060703	LOC81691	exonuclease NEF-sp	0.382195	7.25554	4.6337e-05	0.0042944	6.93768	7.41157
		3710553	HN97InJZXh5fSF6V7I	3710553	SMOX	spermine oxidase	-0.349596	9.58166	0.00208492	0.0311039	9.82742	9.47783				2600392	xp6k.U0zIXeV9Isl0U	2600392	CENPA	centromere protein A	0.382929	7.34183	8.37248e-06	0.00121086	7.0038	7.49073
		2650019	BlfR1ReeUC1e5w6jxA	2650019	FAM53C	family with sequence similarity 53, member C	-0.349385	9.58193	0.000886845	0.0166557	9.73384	9.38446				6250382	9Jf90CV.S8QUVRzoNI	6250382	ANAPC13	anaphase promoting complex subunit 13	0.38307	11.0664	9.00976e-05	0.00705433	10.6576	11.2061
		4040450	fbXiV885e6yJDkIeAI	4040450	VCPIP1	valosin containing protein (p97)/p47 complex interacting protein 1	-0.349179	7.95369	0.00270571	0.0374837	8.21359	7.86441				5360670	6ut.eiK8ytHXql36tU	5360670	PLAU	plasminogen activator, urokinase	0.383225	9.24117	6.88159e-05	0.0058992	8.83958	9.31386
		1070373	xXvV9PnuL6i5PiI47U	1070373	SNX30	sorting nexin family member 30	-0.349017	7.7473	0.00113368	0.0201104	7.88856	7.53955				7650017	Bnl1Unc1QXdUHMAcrk	7650017	SERPINH1	serpin peptidase inhibitor, clade H (heat shock protein 47), member 1, (collagen binding protein 1)	0.38334	10.8049	0.000255662	0.0150001	10.5036	10.9394
		50475	upWX307QohTkj44igk	50475	SLU7	SLU7 splicing factor homolog (S. cerevisiae)	-0.348835	8.911	0.000102416	0.00333123	9.14887	8.80004				4250538	6Eq9lUtdeXohL47tOQ	4250538	STAT3	signal transducer and activator of transcription 3 (acute-phase response factor)	0.383837	9.3215	0.000112256	0.00839862	9.15411	9.40285
		1660215	oleu16v9uON.ne.Uuo	1660215	ATP6V0A1	ATPase, H+ transporting, lysosomal V0 subunit a1	-0.34775	10.3941	0.000138248	0.00407669	10.6317	10.284				4590026	ZS4J4QDQLpUqLt657k	4590026	IMPDH2	IMP (inosine 5'-monophosphate) dehydrogenase 2	0.384051	11.2424	7.08133e-05	0.00599957	10.9286	11.3059
		5220204	HiCg3odVNVUUowC14U	5220204	C19orf66	chromosome 19 open reading frame 66	-0.347283	8.94019	0.00229861	0.0333496	9.11315	8.76587				2650379	6qgEA34VJ4E7fXi0uU	2650379	GREM1	gremlin 1, DAN family BMP antagonist	0.38513	9.93765	0.000971375	0.0376383	9.48015	9.98677
		3930593	Tqi7yiSUoe7Lu7_vk0	3930593	ACSL3	acyl-CoA synthetase long-chain family member 3	-0.346914	8.13518	0.000100923	0.00329721	8.32552	7.9786				6960630	HqZ_1TXof9d07f55IE	6960630	CD97	CD97 molecule	0.385755	9.84781	0.000416589	0.020835	9.50322	10.0089
		4050746	HldjlBIYc9oot4Ro3Q	4050746	ZFHX3	zinc finger homeobox 3	-0.346874	9.54793	0.000122193	0.00375534	9.73354	9.38666				5820129	Z3lXXQiQCQO_rgae.U	5820129	PABPC1	poly(A) binding protein, cytoplasmic 1	0.386135	12.2505	0.000374538	0.0194161	11.9581	12.2528
		6110280	0uudhh1fRtSlFxN2rg	6110280	AMDHD2	amidohydrolase domain containing 2	-0.346218	7.80072	0.00137878	0.0231216	8.03487	7.68865				540053	WlF1W79QtJ.XkIIDXo	540053	FOXM1	forkhead box M1	0.386886	7.23045	2.18684e-05	0.00247909	6.92401	7.33508
		5390603	KnovrnqAVqnDvhBKdg	5390603	UPF2	UPF2 regulator of nonsense transcripts homolog (yeast)	-0.345934	8.8896	0.00100043	0.0182749	9.02464	8.67871				4540072	3aVeAhBJ1f3n2hFHQE	4540072	RMI2	RecQ mediated genome instability 2	0.387012	7.53595	4.27779e-05	0.0040137	7.20728	7.72554
		70168	cHaKeIrqKOX4n4ivgk	70168	MED29	mediator complex subunit 29	-0.345456	9.27913	0.00045723	0.0101398	9.47745	9.13199				1410242	xp.pD390lxFdH77o04	1410242	ATAD2	ATPase family, AAA domain containing 2	0.38707	7.41253	0.00117238	0.0427975	7.09607	7.56664
		2190452	Zl6be16VZe0gjgTsy4	2190452	NA	NA	-0.345285	8.63948	8.66829e-05	0.00291589	8.85143	8.50614				2850575	Ey6v5_K6wp.noV75KQ	2850575	RRM1	ribonucleotide reductase M1	0.388687	10.325	1.70046e-05	0.0020274	10.0245	10.47
		4830129	EXUux4qx6XJTug9XFc	4830129	PI4KB	phosphatidylinositol 4-kinase, catalytic, beta	-0.34511	8.68712	0.00112503	0.0200039	8.80107	8.45596				3830608	xCUu_neKefadCnDdSU	3830608	MGARP	mitochondria-localized glutamic acid-rich protein	0.388786	8.87341	0.000376584	0.0194287	8.59278	8.98713
		7650528	lQM06K1ej4ACJd1R10	7650528	NA	NA	-0.34505	10.9813	0.000578621	0.0121875	11.0928	10.7477				7000161	rjki1Tu13jcC_Tr63g	7000161	OIP5	Opa interacting protein 5	0.388895	7.46559	5.74749e-05	0.00505824	7.12013	7.6416
		7100382	lsSNUnzpfhUltdEjlo	7100382	SPSB1	splA/ryanodine receptor domain and SOCS box containing 1	-0.344714	8.96466	0.000148559	0.00428068	9.12528	8.78057				5720520	oKiggmYIlvLTlruumk	5720520	SNHG6	small nucleolar RNA host gene 6 (non-protein coding)	0.391408	10.7941	0.000396333	0.0200874	10.4997	10.8874
		70463	KdBVGQvXieBOiQqirg	70463	NOL3	nucleolar protein 3 (apoptosis repressor with CARD domain)	-0.344421	8.50613	0.000444194	0.00996627	8.80879	8.46437				3170068	9Ff619hplIXH7nOK6I	3170068	APOBEC3B	apolipoprotein B mRNA editing enzyme, catalytic polypeptide-like 3B	0.392563	7.1979	2.42516e-05	0.00269216	6.9091	7.36008
		2120544	legNVGV79X8237r6Ho	2120544	IMP3	IMP3, U3 small nucleolar ribonucleoprotein, homolog (yeast)	-0.344183	11.5914	0.00226014	0.03296	11.7441	11.3999				4280482	cfeXR9iSH.vdpnXRjo	4280482	DRAM1	DNA-damage regulated autophagy modulator 1	0.39261	10.8525	0.000613798	0.0274889	10.5189	10.8837
		4120053	66uL9VXXz3teIUakCc	4120053	PFKFB3	6-phosphofructo-2-kinase/fructose-2,6-biphosphatase 3	-0.34411	11.6829	0.00271945	0.0375824	11.9133	11.5692				6060719	Z.1lZlUpX5I2I.m1yI	6060719	RPL39L	ribosomal protein L39-like	0.392641	8.5509	0.000311767	0.017099	8.25967	8.69046
		1690608	orHeeLqQp4IIpe6Dkk	1690608	ALDH3A2	aldehyde dehydrogenase 3 family, member A2	-0.343346	10.4683	0.00147908	0.0243209	10.6427	10.2993				2710524	0ni05u_DVH0uRe6XdI	2710524	MAP1B	microtubule-associated protein 1B	0.39407	7.58968	8.67791e-05	0.00690279	7.28836	7.66759
		4180088	cXuunVXefdqtS5P_.c	4180088	ABL1	c-abl oncogene 1, non-receptor tyrosine kinase	-0.343012	9.74257	0.00168611	0.0268854	9.9154	9.57239				4230068	fXQ4KtUJW1W99UWM.U	4230068	RNASEH2A	ribonuclease H2, subunit A	0.394143	7.83328	0.000333061	0.0177107	7.56178	7.92846
		1770661	xjq9LrOJIoIjVIyyUs	1770661	RAB21	RAB21, member RAS oncogene family	-0.34288	8.74378	0.000168263	0.00473023	8.96472	8.62184				2320767	x6pZNcUe4_c16cRfA4	2320767	MATN3	matrilin 3	0.39487	8.12958	0.000660247	0.0289412	7.76428	8.27086
		4850176	0uTENpFUglVbSPV9S8	4850176	RNMT	RNA (guanine-7-) methyltransferase	-0.342095	9.35736	0.00344227	0.0441097	9.55052	9.20843				2760292	lGLhY85.f6XE9.Pea4	2760292	PPP1CC	protein phosphatase 1, catalytic subunit, gamma isozyme	0.395796	9.64599	0.000128623	0.00933961	9.32909	9.72242
		3460711	oVdvX6iOOl.gzkhBf4	3460711	FBXW11	F-box and WD repeat domain containing 11	-0.342084	9.83618	0.00035859	0.00842	9.97641	9.63432				610435	BnlSXq3rAoAsS.SpCA	610435	SSB	Sjogren syndrome antigen B (autoantigen La)	0.39651	10.2512	0.00107001	0.0402245	9.99508	10.3555
		5360424	fkk3u29x4kZ93l2deE	5360424	RPS6KA2	ribosomal protein S6 kinase, 90kDa, polypeptide 2	-0.341982	9.54926	0.000318221	0.00764606	9.60484	9.26286				4610608	6aaey6nd9dfUW4VQXc	4610608	NA	NA	0.396553	9.36982	2.75129e-05	0.00290562	9.0232	9.51991
		6280209	Zr9OhHviQ7EuzrufF4	6280209	CAMSAP2	calmodulin regulated spectrin-associated protein family, member 2	-0.341646	8.36128	8.83988e-05	0.00295609	8.62844	8.2868				5080228	TKeSE_i_Y6lIesSO.k	5080228	ATP2C1	ATPase, Ca++ transporting, type 2C, member 1	0.398363	8.5859	0.0011336	0.0419894	8.32983	8.71409
		1300671	xKJf1Lzfi_Sd7L9_KU	1300671	NCOA4	nuclear receptor coactivator 4	-0.341404	11.6369	0.000424103	0.00963684	11.6829	11.3415				1340367	NSlr9O8Ft8R3hNJQps	1340367	NA	NA	0.398723	8.56108	3.54623e-05	0.00346722	8.20448	8.61819
		670639	9rI7U5U7nXnqHQ9Kc4	670639	LONP2	lon peptidase 2, peroxisomal	-0.341399	8.86292	0.000629096	0.0129857	9.01653	8.67514				520463	0D5HTuh6hbmJ5bury0	520463	GPER1	G protein-coupled estrogen receptor 1	0.398936	9.28855	0.00116229	0.0426347	8.93887	9.40147
		2480128	3TqnUoJezRe7C_s.qQ	2480128	FBXO21	F-box protein 21	-0.340424	9.7588	0.000572292	0.0121107	9.81784	9.47742				6380333	KVLVIFEe_L6ER7AVeo	6380333	CS	citrate synthase	0.401368	10.6129	5.31449e-05	0.00478852	10.2773	10.644
		4210470	36UM.uV3ofyyn_sDuI	4210470	PCNXL4	pecanex-like 4 (Drosophila)	-0.340081	9.07018	0.000664707	0.0134999	9.31531	8.97523				3890523	9nj9cUl.l319Duv1Oo	3890523	NA	NA	0.402608	7.33646	1.73221e-05	0.0020274	7.16636	7.4392
		2350678	3FWFlJONlmSdelzx9E	2350678	HK1	hexokinase 1	-0.339986	7.43637	0.000169646	0.00474934	7.61833	7.27834				1940692	xrr_6oq4SroysSj6iE	1940692	LTBP2	latent transforming growth factor beta binding protein 2	0.402823	10.5981	0.000258017	0.0150993	10.222	10.5829
		3360768	HurpDPS58Ef9yb6xN4	3360768	YAP1	Yes-associated protein 1	-0.339796	9.02775	0.00193423	0.0295351	9.26541	8.92562				2600324	Et61PE22bedK3o4wRk	2600324	TMEM147	transmembrane protein 147	0.403574	11.6306	7.57536e-05	0.0063706	11.3011	11.7934
		6250019	Hfq3fFmIeIpILSVg5c	6250019	SHC1	SHC (Src homology 2 domain containing) transforming protein 1	-0.339446	12.0198	0.000688791	0.013816	12.1704	11.831				730487	iItmqESi31xLERGVl0	730487	RARS2	arginyl-tRNA synthetase 2, mitochondrial	0.403616	9.12921	6.92206e-06	0.00108253	8.85749	9.208
		1470215	cJTeEkpRy4S.f_71zo	1470215	MAP3K8	mitogen-activated protein kinase kinase kinase 8	-0.339418	8.84538	0.000136136	0.00403012	9.04103	8.70161				1820044	N_rX4HEl57fEUuicV8	1820044	ALDH9A1	aldehyde dehydrogenase 9 family, member A1	0.403918	11.6341	2.4306e-05	0.00269216	11.3899	11.6891
		1710437	opxN0zuc4ofclLq6Z4	1710437	NA	NA	-0.339293	7.73557	5.14845e-05	0.00193224	7.93987	7.60058				1770358	HYkdPedXO8.QqXUKkk	1770358	ZDHHC16	zinc finger, DHHC-type containing 16	0.404	9.10324	9.56491e-05	0.00738711	8.85652	9.20651
		1820253	Tl5771E3b578T1.uiU	1820253	PRKRIR	protein-kinase, interferon-inducible double stranded RNA dependent inhibitor, repressor of (P58 repressor)	-0.33905	9.43662	0.00021122	0.00561587	9.52002	9.18097				4040669	oeAQVSK8QOeV6OCe0U	4040669	MGARP	mitochondria-localized glutamic acid-rich protein	0.405959	8.60221	0.000196191	0.0125133	8.28944	8.73422
		6760037	3q3rFfkoX_yvuoALZI	6760037	SYTL2	synaptotagmin-like 2	-0.338749	8.6883	6.3252e-05	0.00226788	8.74723	8.40848				150543	6W70h16.fUp8S6E00k	150543	FAM83D	family with sequence similarity 83, member D	0.40838	7.27139	5.06849e-05	0.00458506	6.92272	7.4161
		2640202	fBCyRXo_Nol13dAeqU	2640202	NOS2	nitric oxide synthase 2, inducible	-0.338622	8.0687	0.000133546	0.00398463	8.33252	7.9939				940474	rUm2okCoTOYuB_JSpM	940474	SRPX2	sushi-repeat containing protein, X-linked 2	0.408497	11.4786	1.47459e-05	0.00183967	11.2128	11.6069
		4010075	Tf7n3Pn._7.vCTtX6U	4010075	XPR1	xenotropic and polytropic retrovirus receptor 1	-0.338415	8.2673	5.27649e-05	0.00197053	8.34528	8.00687				5960253	cNV8JUhN76heFVrT68	5960253	TRMT5	tRNA methyltransferase 5	0.411868	11.1728	0.000163694	0.0109966	10.7582	11.267
		2260066	6l.js.1XQjzQe7vYS4	2260066	CLIP1	CAP-GLY domain containing linker protein 1	-0.337895	9.07992	0.00146937	0.0242324	9.43039	9.0925				2570692	olCbXUp.hbtYDniPqA	2570692	STT3A	STT3A, subunit of the oligosaccharyltransferase complex (catalytic)	0.412377	10.9785	0.000621416	0.0276664	10.6624	11.118
		1240725	ZrCHlEtVSopEe7.Hj4	1240725	SLFN5	schlafen family member 5	-0.337851	7.6138	0.000703088	0.0140288	7.76725	7.4294				7160274	lk5u5KHp7ufodp1K6A	7160274	TXNDC12	thioredoxin domain containing 12 (endoplasmic reticulum)	0.412434	9.43039	0.000865224	0.0349754	9.21472	9.49725
		520201	ESR4IecZUIgoropJQg	520201	C6orf136	chromosome 6 open reading frame 136	-0.33768	8.79779	0.000196136	0.00530174	8.96314	8.62546				5550634	oqJ5InGSX2uS20du3Y	5550634	BEX1	brain expressed, X-linked 1	0.413848	8.4591	9.52145e-05	0.00737864	8.08797	8.53774
		5090382	lKgTliAeOG_SBQYrpY	5090382	NA	NA	-0.337382	11.8569	0.00204569	0.0307002	12.0806	11.7432				6290494	HSjhDStOu3ipNN9dN4	6290494	MCM3	minichromosome maintenance complex component 3	0.414075	8.02742	2.87743e-05	0.00296977	7.66956	8.20098
		650519	04TlFWDp0f0eKOe13g	650519	TMBIM6	transmembrane BAX inhibitor motif containing 6	-0.336776	12.4647	0.000138844	0.00408368	12.6156	12.2789				7040184	9mfFICWXhFOoruvz6Q	7040184	CCDC34	coiled-coil domain containing 34	0.41491	8.71853	0.000153456	0.0104636	8.32963	8.84519
		7550500	EBp7SeefqtCoRl94G0	7550500	JUNB	jun B proto-oncogene	-0.336421	8.40022	0.000451278	0.0100458	8.50555	8.16913				1740673	E9l1w1clHOYjh19BF8	1740673	NA	NA	0.41494	8.31871	3.21461e-05	0.00322969	8.01586	8.53112
		4010414	9r.RA_K6K6mvSzeUeg	4010414	PPFIBP1	PTPRF interacting protein, binding protein 1 (liprin beta 1)	-0.336051	9.92828	0.00111831	0.019925	10.0322	9.69616				3170491	frTvcZV_uVEewgrT1k	3170491	PDIA5	protein disulfide isomerase family A, member 5	0.41617	9.64604	2.71763e-05	0.00290562	9.37712	9.778
		4290037	l4pUCR_fE13jJ79A7k	4290037	NOV	nephroblastoma overexpressed	-0.335324	9.99581	0.00132208	0.0225199	9.93094	9.59562				840446	NqlLddw50j9Uy_n.ns	840446	CYB561	cytochrome b561	0.417989	7.6153	1.85464e-05	0.00212684	7.35844	7.65733
		2900358	Td6KP6rlXdpKgSgsoM	2900358	MFSD12	major facilitator superfamily domain containing 12	-0.335288	7.87289	0.000256056	0.00648163	8.16201	7.82672				2690608	Tme.WXfl9oZaP_G53Y	2690608	RPS7	ribosomal protein S7	0.418132	8.77848	0.000294311	0.0164192	8.53806	8.90684
		1230333	HclQKwvnP9NEvlzlSo	1230333	SS18	synovial sarcoma translocation, chromosome 18	-0.335274	8.3157	0.000904796	0.0168811	8.45271	8.11744				1820093	cA.6KSCd6VU666KUsc	1820093	NA	NA	0.418466	10.6348	0.00104258	0.0397196	10.3062	10.6974
		4120369	6TTnqoj3SEdjo1FRPQ	4120369	APOBEC3G	apolipoprotein B mRNA editing enzyme, catalytic polypeptide-like 3G	-0.334991	7.84398	0.00153578	0.0251055	7.95227	7.61727				6840301	0uZ93hdxOl1dJ5edBw	6840301	NT5DC2	5'-nucleotidase domain containing 2	0.418476	8.5345	7.13541e-05	0.00602292	8.25036	8.65647
		5220152	iAepXghr1JftfXu51c	5220152	TMEM55B	transmembrane protein 55B	-0.334933	8.71783	0.000647153	0.0132381	8.89007	8.55514				6980739	EKz7X8pqg6g1_eR75I	6980739	ABI3BP	ABI family, member 3 (NESH) binding protein	0.419597	10.5609	0.000211016	0.0131269	10.0672	10.5792
		7510309	E7e57V17nq2aO7KQT4	7510309	FRMD6	FERM domain containing 6	-0.334919	11.1625	0.0011786	0.0206971	11.373	11.0381				60184	6pX04X56kSAEV26LEc	60184	NDN	necdin, melanoma antigen (MAGE) family member	0.419751	11.7885	0.000105771	0.00800545	11.4408	11.8777
		5810458	lXnT7fi.cFO5I5Cb0o	5810458	ARHGAP28	Rho GTPase activating protein 28	-0.333686	7.64472	0.000671588	0.0135547	7.79466	7.46097				7000382	Bnp_L_xQBLX0H_R7l8	7000382	PQLC3	PQ loop repeat containing 3	0.420523	9.40595	1.45537e-05	0.00182573	9.05935	9.45613
		5420398	iV7oPQVQfbpmzjFwLo	5420398	TRMT112	tRNA methyltransferase 11-2 homolog (S. cerevisiae)	-0.333452	10.802	0.000493883	0.0107932	10.7907	10.4572				1940632	3Z6l7r4jC0UnGgr94Y	1940632	NCAPG2	non-SMC condensin II complex, subunit G2	0.420859	7.34268	2.24986e-06	0.000500837	7.08313	7.4528
		3370202	ZgtzjsBH_XXux7tMBo	3370202	ANXA2P1	annexin A2 pseudogene 1	-0.33306	10.6652	0.000566422	0.0120272	10.7282	10.3951				4150066	EA4JWlRFYRSV559cHw	4150066	CKB	creatine kinase, brain	0.42152	7.54791	3.88748e-06	0.000717634	7.1074	7.70269
		1300441	xopB7pPn18FJ067uDs	1300441	ZZZ3	zinc finger, ZZ-type containing 3	-0.332914	8.78	0.000122257	0.00375534	8.92264	8.58973				2120634	ZtVhJKQJdE_V0P9Vf0	2120634	CMTM4	CKLF-like MARVEL transmembrane domain containing 4	0.422036	8.96207	2.41537e-06	0.00053246	8.61041	9.08104
		2810463	0VT_7h_IxPF4OJK4CU	2810463	NA	NA	-0.332088	12.3772	0.000742479	0.0144261	12.6233	12.2912				1470669	KV6pQaQSTqXRdd7j98	1470669	TNC	tenascin C	0.423646	13.0322	0.000524657	0.0247669	12.668	12.996
		3840288	ZoVoRXuoXpdAdFA2dM	3840288	LRFN3	leucine rich repeat and fibronectin type III domain containing 3	-0.332003	8.99971	0.00202744	0.030507	9.0989	8.7669				6280242	ogNB0uoTJST.5MUr6k	6280242	DUT	deoxyuridine triphosphatase	0.424659	7.75803	5.91752e-06	0.0010007	7.36311	7.85989
		4780647	6R3lXR9fypAwRJIFG4	4780647	TMEM150A	transmembrane protein 150A	-0.331834	9.12877	0.000218012	0.00574266	9.23243	8.9006				5310615	NUSgsB59IlRLVedLtY	5310615	SLC25A15	solute carrier family 25 (mitochondrial carrier; ornithine transporter) member 15	0.425821	7.79305	2.74274e-05	0.00290562	7.4961	7.95462
		840482	WF_ziugieiGlHiZxeQ	840482	RNF31	ring finger protein 31	-0.331814	8.26251	0.000650367	0.0132893	8.4435	8.11169				940138	uehJW37hLh1S4lUgOE	940138	HRCT1	histidine rich carboxyl terminus 1	0.425849	7.94043	4.88505e-06	0.000858209	7.51441	8.1814
		6480630	6eJh3H9Pv5Sbp2_e_U	6480630	ATP9A	ATPase, class II, type 9A	-0.331778	9.98649	0.000898507	0.0168052	9.97387	9.64209				5550348	QXaXd7TnqC5cd3qUec	5550348	ICMT	isoprenylcysteine carboxyl methyltransferase	0.431825	9.06707	1.71125e-05	0.0020274	8.73246	9.24118
		4640484	H4vv_iwzVEHqsoJ0oc	4640484	CNOT8	CCR4-NOT transcription complex, subunit 8	-0.331637	8.25311	0.000875406	0.0164954	8.47698	8.14535				3060095	0iIE5buX8vJEmpJdLg	3060095	COL12A1	collagen, type XII, alpha 1	0.434516	12.1622	3.97318e-06	0.000723827	11.6909	12.2028
		510554	Tept6hfg5eV6_7odfA	510554	ARHGEF7	Rho guanine nucleotide exchange factor (GEF) 7	-0.331329	9.49719	0.000225704	0.00588385	9.68288	9.35155				1770561	W4w5VChCqbl6ZUuiw8	1770561	ITGA11	integrin, alpha 11	0.43467	10.4188	2.81429e-05	0.00294476	10.0111	10.4376
		1170300	cZeO2oSV51QsQMi4Vs	1170300	MT1G	metallothionein 1G	-0.331097	14.2374	0.000121345	0.00374866	14.4572	14.1261				6100079	ouCelRFzQJVedx7heg	6100079	CENPM	centromere protein M	0.43545	7.28565	1.27102e-05	0.00167948	6.97909	7.41657
		6110736	xsHVVKxjKh4M6FeeAk	6110736	IRS2	insulin receptor substrate 2	-0.33039	9.11999	0.00293368	0.039603	9.35445	9.02406				5670397	WvHo8nV117uOsU5Mi0	5670397	NA	NA	0.438133	9.11154	7.64246e-06	0.00114164	8.86495	9.14152
		6100288	fl07nu53_AoOEkhxAk	6100288	2015-09-01	15 kDa selenoprotein	-0.329718	10.2603	0.00343597	0.0441097	10.3119	9.98216				520682	ZlekT1T_57rs17v1_0	520682	CPA4	carboxypeptidase A4	0.439613	11.2716	0.000112445	0.00839862	11.083	11.3084
		4490044	fotXV6.890sXSnVe7E	4490044	LRFN4	leucine rich repeat and fibronectin type III domain containing 4	-0.329193	7.98427	0.00243101	0.0346645	8.22795	7.89876				3830131	0F8Fl88lI_7XU0efV4	3830131	TUBA1C	tubulin, alpha 1c	0.442388	12.6332	0.000389929	0.019896	12.2825	12.8046
		510288	u0YEMn5ncd7Lzuj5Yk	510288	MFSD1	major facilitator superfamily domain containing 1	-0.329124	9.7239	0.000688507	0.013816	9.94625	9.61713				6450669	f0gC47oTKKQ7uIfqr0	6450669	ANLN	anillin, actin binding protein	0.44252	7.36939	2.60586e-06	0.000547859	7.00572	7.53211
		1010082	uue7R0BBR1IFeOX9_o	1010082	NA	NA	-0.328962	9.86884	0.000419394	0.00955142	10.0448	9.71579				3890670	Nu3z03e73y5Il6Vnvo	3890670	DCAKD	dephospho-CoA kinase domain containing	0.444122	9.73564	2.8764e-06	0.000583138	9.32805	9.81554
		5080326	9T7by.FI1uOUfF7u.o	5080326	PSMA6	proteasome (prosome, macropain) subunit, alpha type, 6	-0.328741	11.491	0.000516272	0.011156	11.5642	11.2354				520670	Ke5JfrpAzdN5aVUoQs	520670	ITGA11	integrin, alpha 11	0.44467	9.45173	1.9107e-05	0.00218012	9.06136	9.46224
		5050402	iSYLWdWZUIKnYICW4c	5050402	HIST1H2BK	histone cluster 1, H2bk	-0.328681	9.33834	0.000972859	0.0178864	9.63903	9.31035				1740681	9eXWjLVYifvWCQkV5I	1740681	BOLA2	bolA family member 2	0.445455	7.62159	1.83645e-06	0.000421197	7.36164	7.71566
		6110204	0qd7bveQ31U9V043ek	6110204	MKLN1	muskelin 1, intracellular mediator containing kelch motifs	-0.328089	9.61598	0.00192909	0.0294764	9.63325	9.30516				5720128	91V_0SAUqHfSj_I6X4	5720128	COQ2	coenzyme Q2 4-hydroxybenzoate polyprenyltransferase	0.447197	8.87712	6.26474e-06	0.00103074	8.547	9.08448
		5260215	feiVLO57uLyC09_eII	5260215	OPTN	optineurin	-0.327791	9.34071	0.00192492	0.0294606	9.53633	9.20853				6650053	0p.q69Q_uiIJ3ikbTk	6650053	MCM3	minichromosome maintenance complex component 3	0.448677	10.0249	1.44832e-05	0.00182573	9.70111	10.2382
		3450041	irgieSOWIJSQESpUeg	3450041	RNF114	ring finger protein 114	-0.327591	9.36666	0.000623699	0.0129213	9.57392	9.24632				1450674	9STIfB1fCVITe_oXhU	1450674	NA	NA	0.449099	11.833	5.42255e-05	0.00482841	11.5036	11.9944
		4900133	oWA4lIXsEXhOOvXd_k	4900133	SRPX	sushi-repeat containing protein, X-linked	-0.327473	9.0855	8.72393e-05	0.0029273	9.2512	8.92373				1030630	oQpMVX1Biiz3sOOLU0	1030630	PPAP2A	phosphatidic acid phosphatase type 2A	0.449724	10.4627	4.0215e-05	0.00385284	9.92019	10.654
		1050132	fVLYgTfsJfTwqUXnt4	1050132	ZNF518B	zinc finger protein 518B	-0.327045	8.2118	0.000941123	0.0174584	8.32814	8.00109				4860543	iXWjLVYifvWCQkV5JU	4860543	BOLA2	bolA family member 2	0.450391	7.56952	1.71796e-05	0.0020274	7.27203	7.68936
		7200097	ioNfvl44c7r1X4eghE	7200097	N4BP2L2	NEDD4 binding protein 2-like 2	-0.326999	8.20852	0.00192546	0.0294606	8.37731	8.05031				6760632	uTfqhcQqXodIoS5Epw	6760632	LEPREL2	leprecan-like 2	0.45153	9.30505	9.27164e-06	0.00128497	8.95271	9.43737
		6280048	Z1g7Acu5yAkBRWUdAU	6280048	NA	NA	-0.326881	8.27216	0.00115034	0.0203582	8.43925	8.11237				3310288	H1.UHcXV0didf1XjSI	3310288	NA	NA	0.451933	10.459	0.000324419	0.0174988	10.0724	10.6919
		2510672	ZaVEV6DqIZNg0TqEjs	2510672	TCF4	transcription factor 4	-0.326867	8.92966	0.00079013	0.0151526	9.09337	8.7665				6130441	lRA1XkJz0Drjoxn6T0	6130441	ASPM	asp (abnormal spindle) homolog, microcephaly associated (Drosophila)	0.45371	7.44464	3.51504e-06	0.000670694	7.1125	7.59784
		7000609	9g9CEuEk8bRV6oSK0k	7000609	ARRDC2	arrestin domain containing 2	-0.326695	8.22463	0.000370112	0.00859279	8.40408	8.07739				5860411	3TUqI_5JJ02OLFOaUQ	5860411	TUBG1	tubulin, gamma 1	0.454071	8.73182	0.000151643	0.0103711	8.41105	8.94043
		1690630	uske9697_RlLqiIMCI	1690630	FAM43A	family with sequence similarity 43, member A	-0.32665	7.40321	0.000239276	0.00617386	7.59328	7.26663				1510180	9GZPNSojrvtevtXUeA	1510180	NA	NA	0.457913	9.92955	2.19833e-05	0.00247909	9.49131	10.0403
		3140369	6lMUe4eT4CO1f3d3lI	3140369	TGIF1	TGFB-induced factor homeobox 1	-0.32627	9.11949	0.00109578	0.0196376	9.35693	9.03066				4150196	lV.9_MUdNRu9ePtRP0	4150196	RAD51AP1	RAD51 associated protein 1	0.458087	7.37473	3.68007e-06	0.000696331	6.99239	7.56052
		3290224	lf6ul.uhp2yegLvjeo	3290224	IRF2BP2	interferon regulatory factor 2 binding protein 2	-0.326219	8.73466	0.000450423	0.0100435	8.83416	8.50794				3180367	uOq6EEW0haiFKknfRI	3180367	HJURP	Holliday junction recognition protein	0.458689	7.44429	1.31053e-05	0.0017004	7.07985	7.67312
		460730	ZKcgDHZH10gV39_8Go	460730	BMPR2	bone morphogenetic protein receptor, type II (serine/threonine kinase)	-0.32558	8.52405	0.0013891	0.0232763	8.79415	8.46857				1050706	ZqR1Qw4LulILoN.Eoc	1050706	CDK1	cyclin-dependent kinase 1	0.459323	7.49152	8.53058e-05	0.00684436	7.09072	7.67305
		7330164	3t7554CO3u5ezQTuH0	7330164	DENR	density-regulated protein	-0.324657	9.48581	7.91276e-05	0.00270991	9.60574	9.28109				2710292	oHcEntS7649S6Hs3e4	2710292	H2AFZ	H2A histone family, member Z	0.464856	11.8612	2.57306e-06	0.000547607	11.4624	12.0122
		840682	EevSlaKKv5qy_RoQ9o	840682	DAPK3	death-associated protein kinase 3	-0.324523	7.61819	0.000743124	0.0144261	7.82432	7.4998				1070386	QIoIq6yKKwhLKgIQqU	1070386	CBX1	chromobox homolog 1	0.465275	8.19457	9.13073e-05	0.00712448	7.79761	8.288
		5130725	rROR.u7dd8PgqKnio4	5130725	ABI1	abl-interactor 1	-0.324274	8.70135	0.00056677	0.0120272	8.89866	8.57438				5870193	QLR0VHu.euUKd_KlUc	5870193	FAM64A	family with sequence similarity 64, member A	0.465364	7.62473	4.91355e-06	0.000858209	7.19833	7.72552
		5390725	o7A8tqbrtG5ew1yedo	5390725	SSTR2	somatostatin receptor 2	-0.323975	9.64345	0.00166503	0.026624	9.76164	9.43767				670731	WtJxUh8OpSJThXRK34	670731	CYTL1	cytokine-like 1	0.466575	9.61977	2.97179e-06	0.000597147	9.1476	9.56267
		7610538	05.K._ASVaYZdz6d2k	7610538	H1FX	H1 histone family, member X	-0.323741	8.8987	0.00106014	0.0191044	9.11007	8.78633				6520692	TEBELFdlUiEUn0ul7Y	6520692	MNF1	mitochondrial nucleoid factor 1	0.46714	10.2576	3.58153e-05	0.00346722	9.91871	10.4557
		3610709	xfe6UjfjT0FLDrF4oE	3610709	PAG1	phosphoprotein associated with glycosphingolipid microdomains 1	-0.32296	7.37178	0.000317066	0.00763347	7.59266	7.2697				4060064	6VSPfSfjXorf9y3ifc	4060064	HMMR	hyaluronan-mediated motility receptor (RHAMM)	0.46836	7.77899	1.11182e-06	0.000300535	7.41145	7.9967
		6060326	Hf0uzdJqx1J_6T1TuE	6060326	ZBTB21	zinc finger and BTB domain containing 21	-0.320986	8.06391	0.00341581	0.0440678	8.26494	7.94395				3450288	KonQu2oHtwfSvu4ubw	3450288	NA	NA	0.468494	12.1751	0.000144194	0.0100125	11.9486	12.322
		5670497	6l5771E3T578T1.uiU	5670497	NA	NA	-0.320843	8.76478	0.00070526	0.0140288	8.91688	8.59604				5700296	NKXnnitHlH3ROefCok	5700296	ZDHHC16	zinc finger, DHHC-type containing 16	0.46959	10.991	1.25047e-06	0.000334038	10.6338	11.0861
		1980403	NPy5UqLUmDht7pQmK0	1980403	ZNF395	zinc finger protein 395	-0.32036	11.4081	0.00344431	0.0441097	11.6678	11.3474				4210309	9pUFj9TDskvFu9F0Rw	4210309	TMED5	transmembrane emp24 protein transport domain containing 5	0.469659	8.83958	2.20548e-05	0.00247909	8.5615	8.98687
		6940605	ilVw_Hg6BV34UC4VSA	6940605	TRIM69	tripartite motif containing 69	-0.320292	7.77398	0.00164192	0.0263659	7.99743	7.67714				50114	3p3cVJyBF9SEfnoSc0	50114	DNAJC9	DnaJ (Hsp40) homolog, subfamily C, member 9	0.48103	9.22458	1.70251e-06	0.000411247	8.85929	9.42338
		7560543	3jjI_X0V0SZEDAnGOU	7560543	MOCS1	molybdenum cofactor synthesis 1	-0.320097	9.13118	0.000773499	0.014884	9.33811	9.01801				1050672	Nfm1foeXvj46Au3keE	1050672	CKAP2	cytoskeleton associated protein 2	0.482009	7.64967	1.80886e-07	6.6245e-05	7.31929	7.82595
		2320598	B66Xp_33gb_vQO7.rU	2320598	NDP	Norrie disease (pseudoglioma)	-0.320033	9.26869	0.00171432	0.0272205	9.39015	9.07012				5700458	HUujYTBYbkl6gcTXQo	5700458	LOXL1	lysyl oxidase-like 1	0.486595	7.94344	1.74181e-07	6.48353e-05	7.53821	8.05889
		5490768	Zsj56XvsrrKhEjhYXo	5490768	GPR56	G protein-coupled receptor 56	-0.319787	7.68715	0.00309347	0.0411177	7.73875	7.41897				6290358	BSXeHuXs3VA91HY9R4	6290358	TPX2	TPX2, microtubule-associated	0.490535	7.44334	8.15507e-06	0.00119464	7.14041	7.61059
		6380296	olJK_nDnOqv.FEvlPs	6380296	SELT	selenoprotein T	-0.319575	7.88338	0.000611483	0.0126913	7.97241	7.65284				4010136	cheO1PTVFd0S9of91U	4010136	COL2A1	collagen, type II, alpha 1	0.491665	9.96575	4.25049e-05	0.0040137	9.51587	10.2548
		520598	ud3ioioldQH0jXur8s	520598	PPP1R21	protein phosphatase 1, regulatory subunit 21	-0.319021	7.93397	0.000551594	0.0117933	8.03257	7.71354				5700477	KqMhfuEhQ97hV7ferQ	5700477	NPR3	natriuretic peptide receptor C/guanylate cyclase C (atrionatriuretic peptide receptor C)	0.494134	7.60192	2.57374e-06	0.000547607	7.14484	7.64807
		6860347	KuXKK3qj139uutHBfE	6860347	FAM46C	family with sequence similarity 46, member C	-0.318553	7.87556	0.00192755	0.0294726	7.9507	7.63215				6900086	uloEAOK7sgSrVEr_qE	6900086	ADAMTS1	ADAM metallopeptidase with thrombospondin type 1 motif, 1	0.494684	10.4204	5.99019e-06	0.0010007	9.95809	10.4777
		5560193	Tfe_XUhdrlRJfijX1A	5560193	BCAS4	breast carcinoma amplified sequence 4	-0.318429	8.03638	0.00123017	0.0213549	8.16686	7.84843				2690541	TFhPJSnbLil1Ikr7ns	2690541	TPGS2	tubulin polyglutamylase complex subunit 2	0.497955	9.50353	3.58688e-05	0.00346722	9.08319	9.69461
		2600301	H4HUml00Un0IPNJ06U	2600301	ZNF565	zinc finger protein 565	-0.318345	7.47201	0.000418042	0.00953017	7.64351	7.32517				2120451	rHSkjdJXceLV8lCS.c	2120451	CD46	CD46 molecule, complement regulatory protein	0.498432	10.0809	1.81658e-06	0.00042089	9.66779	10.1941
		450468	ZVAgF_IkgCJNHlJyWU	450468	MRPL44	mitochondrial ribosomal protein L44	-0.318179	8.37029	0.000409782	0.00937954	8.56335	8.24517				1740458	HXVeIuKF01hTsPFPZ8	1740458	C7orf41	chromosome 7 open reading frame 41	0.499206	9.22509	4.75962e-06	0.000850959	8.71833	9.21998
		5270064	WYA7zwgBL1pak66dGU	5270064	SHROOM4	shroom family member 4	-0.31792	10.4378	0.00210952	0.0313551	10.5569	10.2389				4850398	TaxinFUbz5.1iioIC0	4850398	TXNDC5	thioredoxin domain containing 5 (endoplasmic reticulum)	0.499356	9.47477	6.48109e-06	0.00103074	8.98603	9.6521
		5810176	0nXnkFnuDnniBdXc6o	5810176	RASSF5	Ras association (RalGDS/AF-6) domain family member 5	-0.317848	8.26751	0.000380323	0.00880288	8.41362	8.09577				6110301	lSSXw3Ew99N2UPSWSU	6110301	KDELC2	KDEL (Lys-Asp-Glu-Leu) containing 2	0.499532	9.32091	7.09422e-06	0.00108839	8.90454	9.4911
		6620576	oqKCgYpCicCSbm9JXo	6620576	NA	NA	-0.317577	8.21397	0.00139006	0.0232763	8.346	8.02843				2140408	WCMR157lVN.XUB15e4	2140408	CS	citrate synthase	0.499633	10.7862	1.79317e-06	0.00042089	10.4073	10.8793
		1430647	cq56XVSr_X3xo.IYr0	1430647	TAX1BP3	Tax1 (human T-cell leukemia virus type I) binding protein 3	-0.317242	10.4021	0.000954679	0.0175995	10.31	9.99272				10414	rr5wo6ngnqt6F9DQJc	10414	PTTG1	pituitary tumor-transforming 1	0.501417	8.51953	5.89494e-06	0.0010007	8.10767	8.67152
		6580717	xWmgODnjFcstVJ1QEc	6580717	ZMYND15	zinc finger, MYND-type containing 15	-0.316105	7.15523	0.00100681	0.0183619	7.31534	6.99924				3460707	xWRvd5Vv35VLuv5Pt0	3460707	STMN1	stathmin 1	0.505708	7.57667	3.8263e-07	0.000122827	7.21727	7.83522
		2320189	rjoMglfvnsjubkt6SU	2320189	PTP4A2	protein tyrosine phosphatase type IVA, member 2	-0.315468	11.9049	0.000555641	0.0118575	11.9502	11.6347				2650014	orH6IeItEXtjxfeouk	2650014	TSNAX	translin-associated factor X	0.505924	8.4924	6.19361e-05	0.0053882	8.10234	8.57649
		3930452	EShicef6Jir9ef_L4U	3930452	CDK19	cyclin-dependent kinase 19	-0.314895	8.84155	0.000252409	0.00641623	8.96561	8.65072				5340338	TWl6.Zetu384kU7CXU	5340338	E2F2	E2F transcription factor 2	0.506884	7.38128	4.63312e-07	0.000141642	6.9515	7.59657
		3780403	TT1S4VferlBx4ooMfk	3780403	EFTUD1	elongation factor Tu GTP binding domain containing 1	-0.314732	8.24694	0.000557031	0.0118694	8.39111	8.07637				1070402	Elfl315U7j5rksv3vs	1070402	CANX	calnexin	0.508332	8.47188	8.67746e-06	0.00124703	8.12733	8.61122
		2070288	cQKpNoguSee5eO6gSc	2070288	MT1E	metallothionein 1E	-0.313749	13.9801	0.000242001	0.00623709	14.1912	13.8775				2070368	QdqpwA7WUX0_kEkaU0	2070368	TUBB4B	tubulin, beta 4B class IVb	0.510684	10.9667	2.07817e-06	0.000467198	10.6457	11.2102
		160274	ugqXsXVxS4XrtfP3Fk	160274	NA	NA	-0.313477	7.59191	0.00154334	0.0252108	7.84727	7.53379				1570746	9K5eeNRXBVi3kdBiik	1570746	NA	NA	0.514949	8.85085	7.00838e-06	0.00108253	8.50231	9.02349
		7400689	6uVd7N.4guaDK_fcUU	7400689	GID8	GID complex subunit 8	-0.313205	9.64047	0.000177508	0.00491525	9.95556	9.64235				780332	QLinorpJ9EgeiBSlC0	780332	FAM3C	family with sequence similarity 3, member C	0.518589	8.46353	3.45597e-06	0.000670694	8.0405	8.58038
		4860358	ZV7oCccsT4UmerjEj0	4860358	VBP1	von Hippel-Lindau binding protein 1	-0.312911	9.34932	0.000360252	0.00844156	9.296	8.98309				6370474	ooKJT36B6GH3gB6KGI	6370474	CDCA3	cell division cycle associated 3	0.520707	7.31133	5.93709e-06	0.0010007	6.91868	7.49794
		780204	NpQpu6Pn4lSi9MFJeg	780204	ZNF669	zinc finger protein 669	-0.31203	8.93901	0.00108606	0.0194941	9.0899	8.77787				4390593	0rXqOEkOeEelwovHTU	4390593	KDELR3	KDEL (Lys-Asp-Glu-Leu) endoplasmic reticulum protein retention receptor 3	0.522629	8.74768	1.28504e-05	0.0016866	8.32304	8.93786
		2680100	T0SyX54JTRI6iClOUk	2680100	TNIP1	TNFAIP3 interacting protein 1	-0.311325	9.67653	0.00236677	0.0340281	9.82788	9.51656				7570326	KSe4E6HfVUdd8.nRGo	7570326	ADRB2	adrenoceptor beta 2, surface	0.523476	7.78334	4.30972e-08	2.03868e-05	7.40455	7.96216
		2900593	3Pw.5wR0neV1WNV6dU	2900593	VEGFA	vascular endothelial growth factor A	-0.311264	8.30162	0.000678662	0.0136611	8.54226	8.23099				4050541	of0kyHwdXwlSE3viF4	4050541	HMGN2	high mobility group nucleosomal binding domain 2	0.52499	11.2344	8.93646e-06	0.00126032	10.7872	11.4029
		5260538	opQDUkjImIu4jpIooE	5260538	MSANTD3	Myb/SANT-like DNA-binding domain containing 3	-0.311264	9.12936	0.000487136	0.0106766	9.43744	9.12618				5690274	Tp9JH1.ru.XtUuC_gU	5690274	MCM6	minichromosome maintenance complex component 6	0.52658	9.91665	2.76697e-06	0.000566008	9.447	10.1298
		50402	T5vrUiaKe7l6qL.Xcw	50402	ENO2	enolase 2 (gamma, neuronal)	-0.311149	10.2329	0.000449223	0.0100435	10.5913	10.2802				2030520	0y_n_3tK5LemotSikk	2030520	PIGS	phosphatidylinositol glycan anchor biosynthesis, class S	0.528251	8.38793	2.71507e-06	0.000561668	7.93311	8.42653
		1990593	ilDChXubfdVdcJX7tc	1990593	IRX6	iroquois homeobox 6	-0.310652	7.39349	0.00231321	0.0335187	7.68424	7.37359				6380324	lLkJVIh77K_f.fXXqQ	6380324	CKAP2L	cytoskeleton associated protein 2-like	0.531673	7.34041	1.90499e-07	6.86583e-05	6.92948	7.50329
		4230102	cU6IqFSTKAlEx0l6Oo	4230102	SOCS3	suppressor of cytokine signaling 3	-0.308974	8.04163	0.00302178	0.0404062	8.22102	7.91204				5810743	uop775UlKlnk.4QT9Q	5810743	C12orf75	chromosome 12 open reading frame 75	0.538355	9.99338	3.09456e-05	0.00313683	9.51605	10.2094
		610367	N0_ivqCguKIC7378u8	610367	HECA	headcase homolog (Drosophila)	-0.308794	7.21993	0.000158786	0.0045124	7.42551	7.11672				540131	EgvWrnfZQXpJ3ves5c	540131	PXMP2	peroxisomal membrane protein 2, 22kDa	0.538494	8.78631	3.29233e-06	0.000644446	8.3898	8.95274
		460452	lWrkuHRF7D1JH_IpQo	460452	NA	NA	-0.308668	10.1626	0.000744308	0.0144261	10.2978	9.98909				7050543	ircfyu5nq3eud9Hvl4	7050543	TUBB2B	tubulin, beta 2B class IIb	0.542274	10.5327	1.45313e-05	0.00182573	10.1249	10.7795
		2640114	TT5df9Sknc9_SJTJKE	2640114	NECAP1	NECAP endocytosis associated 1	-0.308616	9.42171	0.000507033	0.0109854	9.58765	9.27904				4490739	BlKOCoh6kId8ZVEeQ8	4490739	PPAP2A	phosphatidic acid phosphatase type 2A	0.544359	11.1713	2.32263e-07	8.11349e-05	10.5727	11.3974
		5900025	iKLI5VdFREBVHS3UVA	5900025	FGF11	fibroblast growth factor 11	-0.308476	7.76352	0.00058786	0.0123338	7.99983	7.69135				2190010	HfpVTFVBftS6JUH3Ao	2190010	RACGAP1	Rac GTPase activating protein 1	0.544909	8.29092	5.98012e-07	0.000176857	7.85984	8.50795
		1660025	rezVUrddBHqeNeDpEo	1660025	CDK18	cyclin-dependent kinase 18	-0.308425	7.65502	0.00103695	0.0187759	7.86115	7.55273				3990458	Z99V3cQV3ddJn339_s	3990458	S100A4	S100 calcium binding protein A4	0.547151	12.4896	0.00061697	0.0275224	12.028	12.5985
		4670711	TxUSCigugqEokTKyOU	4670711	MTR	5-methyltetrahydrofolate-homocysteine methyltransferase	-0.308295	8.43671	0.00158694	0.0256829	8.54567	8.23737				7610537	ukAuCSgIKlekpQSnQI	7610537	HMGB2	high mobility group box 2	0.547622	9.15119	3.84071e-07	0.000122827	8.69571	9.43174
		780672	N1_epdT2tCKB0CiEvs	780672	NA	NA	-0.307882	8.01851	0.000344397	0.00812877	8.13094	7.82306				2940075	KntX6g6ldIoS59QsTc	2940075	STRADB	STE20-related kinase adaptor beta	0.549281	8.59787	3.96926e-07	0.000125175	8.22817	8.82458
		4150279	ZIKnrJ0pLuqgkeCXss	4150279	C6orf47	chromosome 6 open reading frame 47	-0.307752	8.6077	0.000769993	0.0148416	8.83555	8.5278				2480722	NlJfXQg5SEuhIgk5CE	2480722	UBE2T	ubiquitin-conjugating enzyme E2T (putative)	0.552736	7.85576	8.12272e-08	3.35335e-05	7.39737	8.08724
		2000154	cF_U6OF.uystfkXTko	2000154	NA	NA	-0.307723	8.00731	0.000589133	0.0123403	8.0612	7.75348				2630433	BiXUgqHpd5URfh9LP0	2630433	CDT1	chromatin licensing and DNA replication factor 1	0.554523	7.31818	7.81175e-06	0.00115931	6.88216	7.51605
		4490114	rl77DuShX3X9OoiErI	4490114	ZFP91	ZFP91 zinc finger protein	-0.307298	10.4213	0.000330334	0.00784577	10.6686	10.3613				6270195	9d7vd7PscFBdUDZ4nk	6270195	ARL5A	ADP-ribosylation factor-like 5A	0.554761	10.5773	8.55374e-08	3.46824e-05	10.2112	10.7058
		5870521	xpBLlSp3ju3dGm4C7g	5870521	HLA-H	major histocompatibility complex, class I, H (pseudogene)	-0.306809	11.7209	0.00378042	0.0474244	12.0046	11.6978				6660446	uR6JSuH11_bi4qRKDc	6660446	POC1A	POC1 centriolar protein A	0.562141	8.07075	2.72102e-06	0.000561668	7.66721	8.25379
		990017	6n2UX2I325F56V7670	990017	NA	NA	-0.306656	7.9601	0.00178215	0.02781	8.07712	7.77047				3360053	NeX0pSCQFA.FK.p6KI	3360053	KDELR3	KDEL (Lys-Asp-Glu-Leu) endoplasmic reticulum protein retention receptor 3	0.569723	10.581	4.57039e-08	2.11786e-05	10.0367	10.7726
		1410075	ZoF6LQAgefS1WexZeU	1410075	WIPI2	WD repeat domain, phosphoinositide interacting 2	-0.306643	8.05256	0.000741763	0.0144261	8.1924	7.88576				4490020	rks3p_1N63Cunn31Uk	4490020	MXRA5	matrix-remodelling associated 5	0.570334	12.0086	8.42688e-09	5.17137e-06	11.4961	12.1561
		5870605	BflLpXtHVOOf6.4i_o	5870605	NA	NA	-0.306456	8.42016	0.0020497	0.03074	8.60742	8.30097				5700373	lazqZV5PnqO.eVGv_8	5700373	TRIP13	thyroid hormone receptor interactor 13	0.572675	7.84494	1.01194e-07	3.96012e-05	7.4211	8.06595
		2450446	cRJfHL1_fUs.Q_t11U	2450446	TRIM33	tripartite motif containing 33	-0.305913	8.71661	0.00167483	0.0267259	8.90078	8.59487				3890349	6yzOVwBtKpkd7On2mk	3890349	HIST1H4C	histone cluster 1, H4c	0.576884	12.2906	1.51663e-06	0.000378424	11.8526	12.4093
		1660669	o6OFO4UH5EI6iR2Dek	1660669	NA	NA	-0.305802	10.9982	0.00344348	0.0441097	11.2229	10.9171				3370703	liCOpICeiVei_nu3u8	3370703	FEN1	flap structure-specific endonuclease 1	0.577084	8.87646	3.12801e-06	0.000623023	8.4254	9.18147
		110523	iF5cidQDId43SSS6ro	110523	NA	NA	-0.305658	8.11283	0.00127616	0.0220521	8.22361	7.91795				2320170	BngJ4o2iQv3oZHz9XU	2320170	CDC45	cell division cycle 45	0.580396	7.43457	4.16317e-08	2.01125e-05	6.90598	7.63758
		5700088	HK6nVduR.Pl6kv_fjc	5700088	NA	NA	-0.305404	8.5717	0.00173684	0.0274234	8.68961	8.3842				4480026	KUfiW8LnlD7EM5Up_Q	4480026	LAMTOR3	late endosomal/lysosomal adaptor, MAPK and MTOR activator 3	0.582775	9.83695	3.82784e-07	0.000122827	9.33252	9.95404
		3180176	Qsl4LqI_fi1KIUl6kE	3180176	SYNJ2BP	synaptojanin 2 binding protein	-0.305114	9.35532	0.00345287	0.0441944	9.47064	9.16553				780528	9UEi3Ker08Tj04lIFE	780528	CKS2	CDC28 protein kinase regulatory subunit 2	0.585309	8.77255	4.69398e-09	3.43811e-06	8.32735	9.04812
		2360706	EpFEkeqdF36_Nd_x6g	2360706	TOM1	target of myb1 (chicken)	-0.305	10.9719	0.00336659	0.0435814	11.1463	10.8413				4040204	3UIToHu90KvO6pup3U	4040204	APMAP	adipocyte plasma membrane associated protein	0.586541	9.85153	1.06674e-07	4.03691e-05	9.38381	10.0851
		620161	rQIIJXlN7le6l.1eqQ	620161	EFNA4	ephrin-A4	-0.30495	7.84511	0.000596933	0.0124692	7.97933	7.67438				6550288	fo.SvV._5fTlcffDl0	6550288	NA	NA	0.587527	9.24166	1.6911e-06	0.000411247	8.84976	9.32348
		6760494	xXHdOLBd0Sc1JE5RBU	6760494	NA	NA	-0.304833	9.17225	0.000369021	0.00857624	9.36689	9.06206				1570348	NB56UHfE1UkDTalPo8	1570348	CCND2	cyclin D2	0.594143	9.76535	0.000138801	0.00972722	9.31678	9.96521
		1300601	uYJel35_m4wV7TfVAk	1300601	ST3GAL1	ST3 beta-galactoside alpha-2,3-sialyltransferase 1	-0.304832	9.26528	0.000134443	0.00400192	9.3872	9.08237				6770026	NRBiFzZZNtCuhcC9Vk	6770026	AURKB	aurora kinase B	0.594401	7.4608	1.71458e-08	9.49542e-06	7.00008	7.68841
		60403	QlKVx3yVfTTtN1fOeg	60403	ZFAND2B	zinc finger, AN1-type domain 2B	-0.304548	9.00446	0.00128666	0.0221997	9.15323	8.84868				6040458	liiuX3qzd7vrs3uU_k	6040458	MRAP2	melanocortin 2 receptor accessory protein 2	0.594997	8.94607	2.58055e-06	0.000547607	8.36128	9.06535
		6480754	W9COkUnf6lyjHlqVVA	6480754	FAM195B	family with sequence similarity 195, member B	-0.304456	9.06649	0.000190287	0.00518685	9.22261	8.91816				1170047	iliJRH9CwFK66IVTX4	1170047	CRIP1	cysteine-rich protein 1 (intestinal)	0.596012	10.0782	5.99753e-07	0.000176857	9.41533	10.0992
		1230292	KanpUXb.nLgiKYgPng	1230292	MED30	mediator complex subunit 30	-0.304187	8.62347	0.00146381	0.024185	8.68038	8.37619				1450280	HLhL9JyhgSiu0h54JY	1450280	NCAPG	non-SMC condensin I complex, subunit G	0.600242	7.41936	5.09317e-09	3.61392e-06	6.98529	7.66899
		4560020	BS4MBTTflHFV14JRJI	4560020	CXCL12	chemokine (C-X-C motif) ligand 12	-0.303517	7.71667	0.000342323	0.00808822	7.73431	7.4308				540129	o.erexakdxenB6NKaw	540129	KDELR3	KDEL (Lys-Asp-Glu-Leu) endoplasmic reticulum protein retention receptor 3	0.603507	10.7859	6.33742e-06	0.00103074	10.2589	11.0018
		4560064	i7k.0Xiv1eTV5LlAlU	4560064	GLB1	galactosidase, beta 1	-0.303225	10.242	0.00100871	0.0183671	10.2848	9.98156				2940050	o_rupcEAKnQqnoh6ec	2940050	CYB5R2	cytochrome b5 reductase 2	0.604511	9.44748	7.72612e-09	5.01227e-06	8.9272	9.62828
		6660133	fjhRTne7SUoYKiE3q4	6660133	TGFBRAP1	transforming growth factor, beta receptor associated protein 1	-0.302983	8.658	0.00225677	0.032932	8.80547	8.50249				6550373	Q9G111OeKZDEWferSg	6550373	CENPN	centromere protein N	0.604589	7.80916	2.75394e-07	9.33299e-05	7.26418	7.99879
		7320551	3XSSesN_d5_EE3i5JY	7320551	LYN	v-yes-1 Yamaguchi sarcoma viral related oncogene homolog	-0.302588	8.65923	0.000787516	0.0151408	8.90275	8.60016				7380554	ZYBoM9Q53_1qiOm_14	7380554	LSM3	LSM3 homolog, U6 small nuclear RNA associated (S. cerevisiae)	0.608334	10.5469	7.45366e-06	0.00112829	10.0783	10.6631
		4920523	61fbvFdezA1Bd6tb3Y	4920523	HOXC6	homeobox C6	-0.302237	10.1835	0.0014519	0.0240107	10.2905	9.98823				4760646	cYOko5Xu.T1L6955VU	4760646	TROAP	trophinin associated protein	0.614497	7.51974	3.18523e-08	1.6072e-05	7.16994	7.7135
		4730181	fgHvgnkgUGK6WDX30o	4730181	FTH1P12	ferritin, heavy polypeptide 1 pseudogene 12	-0.301672	13.5034	0.00208437	0.0311039	13.7673	13.4656				3890544	xh7XpNgd1d7uw_iiFE	3890544	NUP37	nucleoporin 37kDa	0.617045	9.40836	3.53154e-09	3.08412e-06	8.85929	9.54561
		1230242	W9EVl6.fgu56tfV3nU	1230242	UBE2L3	ubiquitin-conjugating enzyme E2L 3	-0.301244	8.85835	0.00101224	0.0184166	8.95333	8.65209				2630577	llPVel9PmoPd.lFdJ4	2630577	CAV2	caveolin 2	0.617374	9.43252	1.78793e-06	0.00042089	8.89949	9.67522
		4250343	Zk5Qkk50uq.yntE5J4	4250343	PPP1R2	protein phosphatase 1, regulatory (inhibitor) subunit 2	-0.300574	8.7602	0.00108426	0.0194772	8.95911	8.65853				6200468	l.eSZlGKOlRCSNxx2g	6200468	CKS2	CDC28 protein kinase regulatory subunit 2	0.6213	8.52497	7.50877e-10	8.83146e-07	8.08234	8.76304
		7550022	xnTT3qL9TsunOS7oC4	7550022	STXBP5	syntaxin binding protein 5 (tomosyn)	-0.300568	8.59175	0.000526405	0.0113355	8.85411	8.55355				6960142	u1dct7Xm13tVq.SIQc	6960142	COL1A1	collagen, type I, alpha 1	0.624517	10.0952	6.23073e-07	0.000181378	9.74712	10.3904
		1410600	fAAo0np6kq6dO3MN0k	1410600	TRIM13	tripartite motif containing 13	-0.300433	9.00157	0.00246106	0.0349256	9.1426	8.84217				5290270	cNeHntOm5XeiClejuM	5290270	S100A4	S100 calcium binding protein A4	0.625537	12.1783	3.7176e-06	0.000697618	11.5878	12.2896
		5960703	cuu9Th9IsTU5otTz_I	5960703	2002-09-01	septin 2	-0.299845	11.6138	6.55941e-05	0.00232716	11.6037	11.3038				1300497	611OlTc2Wk13QuvF70	1300497	SPCS1	signal peptidase complex subunit 1 homolog (S. cerevisiae)	0.625793	11.7014	2.44452e-07	8.40989e-05	11.176	11.8507
		2630563	N7RuSgS4pKhKr3nX3Q	2630563	SLC39A14	solute carrier family 39 (zinc transporter), member 14	-0.299676	12.3629	0.0012347	0.0214009	12.5461	12.2464				1260767	cIuKeiukn0SB6IFKUI	1260767	FAM3C	family with sequence similarity 3, member C	0.629777	8.60466	9.16505e-08	3.6509e-05	8.10736	8.76615
		6270273	KKRfSYoSQKm3EiFJTM	6270273	KHDRBS3	KH domain containing, RNA binding, signal transduction associated 3	-0.299379	7.88648	0.000650827	0.0132893	8.07309	7.77371				6900209	E1CVE.UC0VUGbXdEW0	6900209	ADAM19	ADAM metallopeptidase domain 19	0.635603	8.33245	4.64509e-07	0.000141642	8.02102	8.49347
		20392	oToo.qIwJ7seW__itQ	20392	CISD1	CDGSH iron sulfur domain 1	-0.299069	10.6337	0.00195525	0.0298159	10.7797	10.4806				3420554	Th3rxI_343fo3XSN.o	3420554	PBK	PDZ binding kinase	0.638374	7.46391	7.99996e-09	5.04575e-06	6.95563	7.67096
		7210192	0SpIF3ghlHXUJfRXug	7210192	ADA	adenosine deaminase	-0.29828	7.94871	0.00198336	0.0301749	8.03001	7.73173				6480703	Q.Qr3BXMeyz3_q5V3U	6480703	AXL	AXL receptor tyrosine kinase	0.640022	10.6379	2.19282e-07	7.7797e-05	10.1313	10.8263
		6420017	ZX55cV.3dd690F0GL0	6420017	SIN3A	SIN3 transcription regulator family member A	-0.298246	8.99378	0.00379503	0.0475551	9.07969	8.78144				1230682	QkXgJ9dhN7wwJbKV_0	1230682	BIRC5	baculoviral IAP repeat containing 5	0.644377	7.71351	1.4856e-06	0.000374802	7.26298	7.87286
		620047	WiQB5EB_RPoC5BC9W4	620047	BNIP3L	BCL2/adenovirus E1B 19kDa interacting protein 3-like	-0.29819	7.88902	0.000993151	0.0181566	8.09779	7.7996				7510709	0nu9VB3veZGASze.ik	7510709	CEP55	centrosomal protein 55kDa	0.645608	7.69336	3.94554e-09	3.16652e-06	7.22248	7.91295
		7610097	rqVD33UYQ5WFk75EFQ	7610097	SETMAR	SET domain and mariner transposase fusion gene	-0.298074	8.63603	0.00045375	0.0100811	8.79066	8.49259				1450192	WSemIeyVXVHVEdHfkg	1450192	CENPM	centromere protein M	0.653127	7.73779	7.6865e-09	5.01227e-06	7.23311	7.95343
		3520541	cX8.55_OOIqKnnlEh4	3520541	CHUK	conserved helix-loop-helix ubiquitous kinase	-0.298009	7.86279	0.000272412	0.0067748	8.00814	7.71013				4260075	fHsiiVejfNKdJcjiYM	4260075	LSM3	LSM3 homolog, U6 small nuclear RNA associated (S. cerevisiae)	0.65586	10.7958	4.75241e-08	2.15817e-05	10.2843	10.9369
		2510332	QroP5K0lSg_kigsrt4	2510332	ZNF263	zinc finger protein 263	-0.29793	8.94461	0.000538126	0.0115475	9.11311	8.81518				1510291	EdRTqDUN75LdfQk97Y	1510291	PTTG1	pituitary tumor-transforming 1	0.656527	9.17318	4.67858e-07	0.000141642	8.65246	9.43554
		1070551	lV0EuOCiG7fo6KJJ7U	1070551	CSRP2BP	CSRP2 binding protein	-0.297824	7.97803	0.0013432	0.0226925	8.07424	7.77642				7570148	HXfUJXm1JibRJEF5AA	7570148	LMNB2	lamin B2	0.667549	9.08839	1.45994e-08	8.49984e-06	8.58983	9.32416
		4850079	KXlXe.WOK7Gji4XkcI	4850079	WDR5	WD repeat domain 5	-0.297627	7.97237	0.000912007	0.0169939	8.05975	7.76213				7330253	0ofRQkgMVokZTUQrnk	7330253	MCM5	minichromosome maintenance complex component 5	0.669547	8.1017	1.54043e-08	8.74424e-06	7.57535	8.431
		4920669	oi5F3_HK1SjVftXoso	4920669	OXSR1	oxidative stress responsive 1	-0.29692	10.1299	0.00104104	0.018835	10.3354	10.0385				3460520	6d0S7Hcwiu6u3v60o4	3460520	CCND2	cyclin D2	0.670802	10.8073	6.3579e-08	2.72382e-05	10.3196	10.9431
		5820768	QElrAaDRs69.e6t7pE	5820768	DEF8	differentially expressed in FDCP 8 homolog (mouse)	-0.29673	9.35388	0.00192321	0.0294606	9.4832	9.18647				620360	reVylPkk18jqGTDTxc	620360	CAV2	caveolin 2	0.673969	8.5971	2.58059e-08	1.37396e-05	8.04487	8.7741
		6370678	Z_jCSSxSf0.sEt7pPo	6370678	PTBP3	polypyrimidine tract binding protein 3	-0.296602	8.49404	0.0037266	0.0469307	8.74503	8.44842				990070	QQZ5pqaTqMGaU65liM	990070	MEST	mesoderm specific transcript	0.676737	8.91027	2.64018e-05	0.00286833	8.49505	9.13342
		6280092	f19hdR5lUXV5e7u8.Q	6280092	SLC25A23	solute carrier family 25 (mitochondrial carrier; phosphate carrier), member 23	-0.296508	9.37613	0.000952278	0.0175792	9.39938	9.10287				5260014	3ZI6Kh14TJSee4DDoI	5260014	CDKN3	cyclin-dependent kinase inhibitor 3	0.693007	8.35528	1.36694e-08	8.1678e-06	7.69148	8.56557
		4120431	9qrTqLkSTyEs.r0V7A	4120431	TMEM100	transmembrane protein 100	-0.296285	7.26816	7.85842e-05	0.00269537	7.40665	7.11036				4640403	KqOhjdUX9qU75VbiUM	4640403	AXL	AXL receptor tyrosine kinase	0.697863	11.1653	1.02901e-07	3.96012e-05	10.6443	11.3328
		20647	TFOcyiHqQBexDhBXoI	20647	ANTXR1	anthrax toxin receptor 1	-0.29578	10.4797	0.000582968	0.012245	10.511	10.2152				6020170	ECgp1eTtefnkZROrus	6020170	MCM4	minichromosome maintenance complex component 4	0.700532	8.50107	4.04427e-09	3.16652e-06	7.98963	8.79397
		2320286	uiflLrh5SgbXONR.vo	2320286	JARID2	jumonji, AT rich interactive domain 2	-0.295755	7.78563	0.00316309	0.0417749	8.03193	7.73618				5550328	iOf.tSojtvtevlXUeI	5550328	NA	NA	0.702839	10.4805	5.49433e-10	7.33849e-07	9.92871	10.6532
		1660736	9mt0pQ8e6JJ.T1xUfk	1660736	ATP6V1D	ATPase, H+ transporting, lysosomal 34kDa, V1 subunit D	-0.295532	10.401	0.000627307	0.0129605	10.6731	10.3776				5420309	T1.KDnu7e1pFWspePo	5420309	AURKA	aurora kinase A	0.707048	7.72685	5.94969e-10	7.50521e-07	7.23754	8.02943
		5720768	3ep7rP6uN.E99IdO7s	5720768	IRAK3	interleukin-1 receptor-associated kinase 3	-0.295528	7.89944	0.000284813	0.00701406	8.10585	7.81033				2340392	TuUn0AFY7rqzSikmnw	2340392	MELK	maternal embryonic leucine zipper kinase	0.719533	7.83987	6.55976e-08	2.75826e-05	7.29939	8.1568
		5310360	3t7o3njsS5f55zo0A0	5310360	TLE4	transducin-like enhancer of split 4 (E(sp1) homolog, Drosophila)	-0.295217	7.62587	0.00177391	0.0277208	7.85856	7.56334				4730605	Wg57u3taRVrKXj6v3I	4730605	AURKA	aurora kinase A	0.730892	7.89108	1.12533e-09	1.06466e-06	7.36926	8.18556
		6770209	WJeRGp_rq9f6II7p6A	6770209	C2CD2	C2 calcium-dependent domain containing 2	-0.294505	10.1321	0.00397392	0.0492457	10.2917	9.99716				4920201	9kpLnP37lwg79QC2TY	4920201	GALNT1	UDP-N-acetyl-alpha-D-galactosamine:polypeptide N-acetylgalactosaminyltransferase 1 (GalNAc-T1)	0.73753	8.0571	5.88576e-08	2.58283e-05	7.42355	8.2517
		6510735	QjpTeSFCCQldBIHg3E	6510735	DDX60L	DEAD (Asp-Glu-Ala-Asp) box polypeptide 60-like	-0.293956	7.1858	0.00128252	0.0221452	7.41254	7.11858				5050053	6Uf5NQR30VF1TGQqjs	5050053	TXNDC5	thioredoxin domain containing 5 (endoplasmic reticulum)	0.752234	11.3005	8.55686e-10	8.83146e-07	10.6565	11.5182
		3360681	cVSIwKeU.6q3sfOl4A	3360681	TNFAIP3	tumor necrosis factor, alpha-induced protein 3	-0.293842	7.5639	0.000446552	0.0100093	7.70805	7.4142				6290112	W36XVB31R1SDUgsJ3k	6290112	SRPR	signal recognition particle receptor (docking protein)	0.762816	9.46211	5.91505e-08	2.58283e-05	8.84874	9.6973
		2510292	ir_AidNlC9_NR_T1Ko	2510292	RNF219	ring finger protein 219	-0.29381	8.41463	0.00158195	0.025657	8.56434	8.27053				7000386	BWDoFLhJXqzXdXT3QQ	7000386	SEC22C	SEC22 vesicle trafficking protein homolog C (S. cerevisiae)	0.766654	8.75288	3.44884e-08	1.70238e-05	8.24443	8.84447
		50086	9SC__fOO7i4EzlHl6U	50086	TCF12	transcription factor 12	-0.293544	8.32956	0.00132489	0.022551	8.48649	8.19294				3180408	3XXsbKeSG4CVSq1P7M	3180408	XXYLT1	xyloside xylosyltransferase 1	0.771195	8.78639	2.26036e-10	3.66597e-07	8.26998	9.0392
		3460685	fIouv7hCaDUDpPYunU	3460685	KYNU	kynureninase	-0.292979	7.8913	0.000264569	0.00665261	7.99659	7.70361				2940110	rUvfXhFo6ufqBb_JfM	2940110	UHRF1	ubiquitin-like with PHD and ring finger domains 1	0.772823	8.45993	4.28546e-09	3.24352e-06	7.83515	8.83317
		4610289	BVTqe5QO9UqeReAKpM	4610289	MT1DP	metallothionein 1D, pseudogene	-0.291609	7.50772	0.000396859	0.00911822	7.69822	7.40661				1780601	lCVFfUT6l6edz3sULE	1780601	MLEC	malectin	0.78715	9.34987	4.00942e-09	3.16652e-06	8.66264	9.5755
		6900600	Z4olc5V4nsFUdShCMk	6900600	MFSD5	major facilitator superfamily domain containing 5	-0.29149	10.0284	0.00117572	0.0206785	10.122	9.83047				510041	WgE3lTuz46SJ75UQmU	510041	SEC22C	SEC22 vesicle trafficking protein homolog C (S. cerevisiae)	0.788686	9.6631	8.22679e-10	8.83146e-07	8.97158	9.72929
		4180079	3Gm9endeVEo4E.2n18	4180079	CRISPLD2	cysteine-rich secretory protein LCCL domain containing 2	-0.291407	9.20551	0.000761998	0.014725	9.18932	8.89792				2650608	xX7dOhfRSFxdAkUSTk	2650608	CCNA2	cyclin A2	0.810354	7.77534	1.57865e-10	2.75729e-07	7.17114	8.10112
		6200670	cFS454rTueg57P6FEQ	6200670	LPIN1	lipin 1	-0.291374	10.7114	0.00175568	0.0275498	10.8594	10.5681				940431	ige7pCIl0RdHK5IiVI	940431	CALU	calumenin	0.817245	10.9824	2.96795e-08	1.5316e-05	10.2181	11.1693
		3940242	HeKiKiV1AfSNe6vyzQ	3940242	PPP1R21	protein phosphatase 1, regulatory subunit 21	-0.291295	7.99963	0.00322513	0.0423932	8.09365	7.80236				160097	Z46PfU15aOLuruMSXE	160097	MELK	maternal embryonic leucine zipper kinase	0.862399	7.93498	1.09066e-09	1.06466e-06	7.24626	8.25345
		4730369	ZhXwAhHt0Huu8kUlJ0	4730369	BTG1	B-cell translocation gene 1, anti-proliferative	-0.291263	13.4538	0.000641548	0.0131352	13.6441	13.3529				1400673	clyu1_J4FkeCB37XR4	1400673	CDCA5	cell division cycle associated 5	0.880275	8.16647	3.67434e-10	5.56198e-07	7.53746	8.36577
		4670398	lLq5yrfh.N1nkQku74	4670398	TEAD2	TEA domain family member 2	-0.291245	10.5972	0.00147325	0.0242579	10.7131	10.4219				6020735	irp0SIKOkjrklBDnhY	6020735	GINS2	GINS complex subunit 2 (Psf2 homolog)	0.882697	8.01163	8.3698e-10	8.83146e-07	7.25494	8.3586
		5050441	Ne795C5TX7Eu8IqwTo	5050441	ZEB2	zinc finger E-box binding homeobox 2	-0.291109	7.60032	0.00113045	0.0200688	7.7839	7.49279				1500553	ccp.nyzTtTv19F0uic	1500553	NUSAP1	nucleolar and spindle associated protein 1	0.891565	8.15466	1.32765e-11	3.76822e-08	7.44754	8.45997
		1450333	91r.DPno.nF.rx_5Ls	1450333	AKAP11	A kinase (PRKA) anchor protein 11	-0.29103	8.14192	0.000216689	0.00572353	8.34952	8.05849				1990546	T9U13d7opQFB3_UklE	1990546	MLEC	malectin	0.919584	10.4809	9.86932e-13	7.46976e-09	9.72811	10.7835
		5260546	BXsNUkfoinivmUcR1I	5260546	ADAM17	ADAM metallopeptidase domain 17	-0.290896	9.40492	0.00121893	0.0212411	9.56537	9.27447				5910364	3oz7S38qvqejlisAvc	5910364	TYMS	thymidylate synthetase	0.931501	9.46596	1.56175e-11	3.94012e-08	8.65994	9.83589
		4230470	3IBLuikpmNJYHcqH64	4230470	FOXN3	forkhead box N3	-0.290737	10.2795	0.00133327	0.0226088	10.4698	10.1791				1050195	NjXGdGm9V.HQN6l.6Q	1050195	KIF20A	kinesin family member 20A	0.944344	8.17837	4.6448e-10	6.59156e-07	7.48015	8.43299
		6760546	3Xvv55T6TgOlB7p7xI	6760546	TIPARP	TCDD-inducible poly(ADP-ribose) polymerase	-0.290243	8.95251	0.000295141	0.00720589	9.16664	8.8764				5360070	rSTjV0ngdAJbQIX5dU	5360070	CCNB2	cyclin B2	0.975935	8.1519	1.17041e-11	3.76822e-08	7.43426	8.47408
		6350037	rCeDkQije4R4Tp7ruQ	6350037	DNM1L	dynamin 1-like	-0.289541	7.89258	0.000557246	0.0118694	7.91853	7.62899				4730196	N4TSXn31Xeaf0eeL94	4730196	TK1	thymidine kinase 1, soluble	1.00087	8.42055	4.24261e-11	9.63327e-08	7.55597	8.76696
		3190066	Q1QkESFHfVflXVUioc	3190066	ARFGAP2	ADP-ribosylation factor GTPase activating protein 2	-0.289502	8.44442	0.00251373	0.0355397	8.63564	8.34614				670286	clPfF5V8d4fPqAqIHk	670286	CDK6	cyclin-dependent kinase 6	1.02056	8.40672	2.06799e-12	9.39115e-09	7.69134	8.81663
		2320133	xk6Coy.p1fopzsp_1Y	2320133	TXNRD1	thioredoxin reductase 1	-0.289379	8.3493	0.00161137	0.0260411	8.65329	8.36391				6770619	9ud_nfqeixbriosBHI	6770619	GLO1	glyoxalase I	1.07508	10.7678	6.84995e-11	1.41395e-07	9.93179	11.031
		4060561	Wp2mgxd8hCRFeqhLjA	4060561	FTH1P2	ferritin, heavy polypeptide 1 pseudogene 2	-0.288821	11.4397	0.00290841	0.0393471	11.6488	11.36				2070494	iTtHHqiu9edyfUY4pk	2070494	PRC1	protein regulator of cytokinesis 1	1.11287	9.07482	4.94746e-13	5.61686e-09	8.27106	9.53378
		4120411	Z6qP.S6BX5VQO2FJVQ	4120411	ARHGEF2	Rho/Rac guanine nucleotide exchange factor (GEF) 2	-0.288603	11.7558	0.00230426	0.0334103	11.8659	11.5773				1500010	HClLklAJJdNRQpNZ4I	1500010	CDC20	cell division cycle 20	1.15663	9.05062	8.67251e-12	3.28197e-08	8.18753	9.29241
		1570156	igVgS9VeuSoulMrp1w	1570156	OAS2	2'-5'-oligoadenylate synthetase 2, 69/71kDa	-0.288453	7.15915	0.00308638	0.0411023	7.39715	7.1087				5090754	iKKgVb_bmVB1QukAKA	5090754	KIAA0101	KIAA0101	1.24925	8.56453	1.40727e-12	7.98839e-09	7.56754	8.97708
		3420747	WuDuXii3aBogFLVYFA	3420747	ADD3	adducin 3 (gamma)	-0.288049	7.73905	0.00107377	0.019304	7.75918	7.47113				3990619	x.Sd_F7Vd6eXeLeDdU	3990619	TOP2A	topoisomerase (DNA) II alpha 170kDa	1.48153	8.50141	2.89607e-15	6.57582e-11	7.34119	8.97964
		1510673	9Kp7kdKXhW_R4EIUDc	1510673	NA	NA	-0.287863	7.99811	0.0014169	0.0235866	8.24642	7.95855
		4050056	6nqrfcbivX6b78K0HU	4050056	TBC1D16	TBC1 domain family, member 16	-0.286993	7.93639	0.00176012	0.0275813	8.05927	7.77228
		650709	3YeUqXyHUTtT.70rMk	650709	RNF34	ring finger protein 34, E3 ubiquitin protein ligase	-0.286462	9.24333	0.00188293	0.0290447	9.39164	9.10518
		1230632	HnlJVHQf0vp3u0v9T0	1230632	RNF38	ring finger protein 38	-0.286374	7.94505	0.000633379	0.0130385	8.13712	7.85075
		6860719	ul690Lv1yEiKRerSzw	6860719	CYTH1	cytohesin 1	-0.286278	9.01897	0.000792896	0.0151892	9.3619	9.07562
		2970088	3uIneDntQVSejuSnFA	2970088	LIPT1	lipoyltransferase 1	-0.285987	7.71715	0.00144069	0.0238602	7.89288	7.60689
		1710630	KYSShMTvruCHqGEerI	1710630	ST6GAL1	ST6 beta-galactosamide alpha-2,6-sialyltranferase 1	-0.285899	9.06808	0.00265201	0.0369351	9.19165	8.90575
		3780079	Q1x9s0fBSyc3qOvUik	3780079	NA	NA	-0.285859	8.03816	0.000980143	0.0179767	8.13803	7.85217
		1740528	HXrUVKPLhSv9KAo.n0	1740528	NR3C1	nuclear receptor subfamily 3, group C, member 1 (glucocorticoid receptor)	-0.285631	7.69177	0.00111391	0.0198683	7.79984	7.51421
		4850504	TVI0yF3eTLLTK34f6o	4850504	ENTPD3	ectonucleoside triphosphate diphosphohydrolase 3	-0.285536	7.87487	0.000740922	0.0144261	8.03414	7.7486
		2470161	ood7Xu0Xd1K7Unt05c	2470161	PLEKHF1	pleckstrin homology domain containing, family F (with FYVE domain) member 1	-0.285438	9.22224	0.00344282	0.0441097	9.42204	9.1366
		3140520	oJVKJUv0Ol_e7rv0Lk	3140520	TMOD1	tropomodulin 1	-0.28542	7.5938	0.00019685	0.00530944	7.63206	7.34664
		4490612	uRl_S4fdt6i6keLXdI	4490612	CYB561D1	cytochrome b561 family, member D1	-0.285053	7.59194	0.00397549	0.0492457	7.7198	7.43475
		3450280	9LSxaCJeO4qSrqt6B8	3450280	PLEKHO1	pleckstrin homology domain containing, family O member 1	-0.285042	9.05516	0.00281733	0.0383332	9.26264	8.97759
		3190609	BNbgFq61QicgHSgFUo	3190609	SBNO2	strawberry notch homolog 2 (Drosophila)	-0.284381	8.65663	0.000803911	0.0153581	8.84109	8.55671
		7040709	EM0HlJeiCuEtQu5BJ4	7040709	IGF2BP2	insulin-like growth factor 2 mRNA binding protein 2	-0.284359	9.20997	0.00205529	0.0308036	9.36881	9.08445
		6450278	fNrt557tVK37urpEjc	6450278	MKNK1	MAP kinase interacting serine/threonine kinase 1	-0.28427	8.57732	0.00354309	0.0451202	8.71768	8.43341
		6110279	NGgYGkd8Ur8WklDVLU	6110279	NET1	neuroepithelial cell transforming 1	-0.283965	8.17065	0.000975365	0.017918	8.32403	8.04007
		2000592	HYQkRVqiEuEOArCXSk	2000592	FTH1P8	ferritin, heavy polypeptide 1 pseudogene 8	-0.283838	9.28209	0.00242758	0.0346452	9.5098	9.22596
		1340521	feXBv597jrzPlyQkRU	1340521	YWHAB	tyrosine 3-monooxygenase/tryptophan 5-monooxygenase activation protein, beta polypeptide	-0.283665	11.3758	0.00130446	0.0224527	11.4922	11.2086
		7160414	ZnfAAeVPYool_SKuAk	7160414	C7orf63	chromosome 7 open reading frame 63	-0.28334	7.82471	0.00041403	0.0094482	7.83371	7.55037
		1030044	EWoL7_uCglXV6k.3lw	1030044	B4GALT3	UDP-Gal:betaGlcNAc beta 1,4- galactosyltransferase, polypeptide 3	-0.283268	9.27301	0.00200787	0.0303339	9.43817	9.1549
		2490463	HpfZ_Tz_pfT0jgfiuU	2490463	MXI1	MAX interactor 1, dimerization protein	-0.282894	7.40272	0.0015794	0.025634	7.53853	7.25563
		5080156	lXIpI6niMAh76pReFI	5080156	CLP1	cleavage and polyadenylation factor I subunit 1	-0.28244	8.05963	0.00073222	0.0143449	8.2019	7.91946
		5340553	cq3agOdI_O3xST996k	5340553	CEP350	centrosomal protein 350kDa	-0.282213	8.17094	0.00387465	0.0483926	8.28192	7.99971
		4200291	NEgvvnzju4uBM5R5ek	4200291	TCF12	transcription factor 12	-0.281839	8.11587	0.00105659	0.0190839	8.29696	8.01512
		6650612	i_Ul3nnXnXq.gjkpY0	6650612	TOLLIP	toll interacting protein	-0.281369	8.10045	0.00204142	0.0306767	8.24081	7.95944
		2350068	ui7IehIRKnH3i6KJIQ	2350068	WDR12	WD repeat domain 12	-0.281317	8.39502	0.000130921	0.00393733	8.54561	8.2643
		7040546	6dwbogOJ9OeKy6_XyI	7040546	LCLAT1	lysocardiolipin acyltransferase 1	-0.280873	8.22813	0.000927844	0.0172403	8.3475	8.06663
		2320129	9XkaCEIiyXdS.SQWco	2320129	YBX3	Y box binding protein 3	-0.280782	12.7806	0.0019888	0.0301829	12.9404	12.6596
		4180521	3JOFKIq8OIlCKLF65E	4180521	TMEM63B	transmembrane protein 63B	-0.280362	7.26951	0.000603255	0.012555	7.43597	7.15561
		1510746	6oB8uoiwSDl6Il4d4k	1510746	BET1	Bet1 golgi vesicular membrane trafficking protein	-0.280233	7.91757	0.00378773	0.0474899	7.98102	7.70079
		4230678	uR8UXT_f96KU5DMpqE	4230678	HIST2H2BE	histone cluster 2, H2be	-0.280203	7.47562	0.00156588	0.0254891	7.6306	7.3504
[truncated: 1,140 more rows]

## Sheet: Supplemental Table S4
	Down with -3p.1 in HAC vs Con (693)	Down with -3p.2 in HAC vs Con (237)	Down with -3P.1 and -3p.2 in HAC vs Con (161)	Down with -3p.1 in HAC vs -3p.2 (153)	Down with -3p.2 in HAC vs -3p.1 (84)
[truncated: 693 more rows]

[truncated: 6 more sheets: Supplemental Table S5, Supplemental Table S6, Supplemental Table S7, Supplemental Table S8, Supplemental Table S9, Supplemental Table S10]
